# Supplementary material
Source: PubMed Central journal article supplement (PMC2666792)

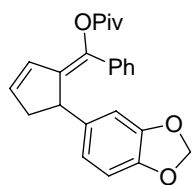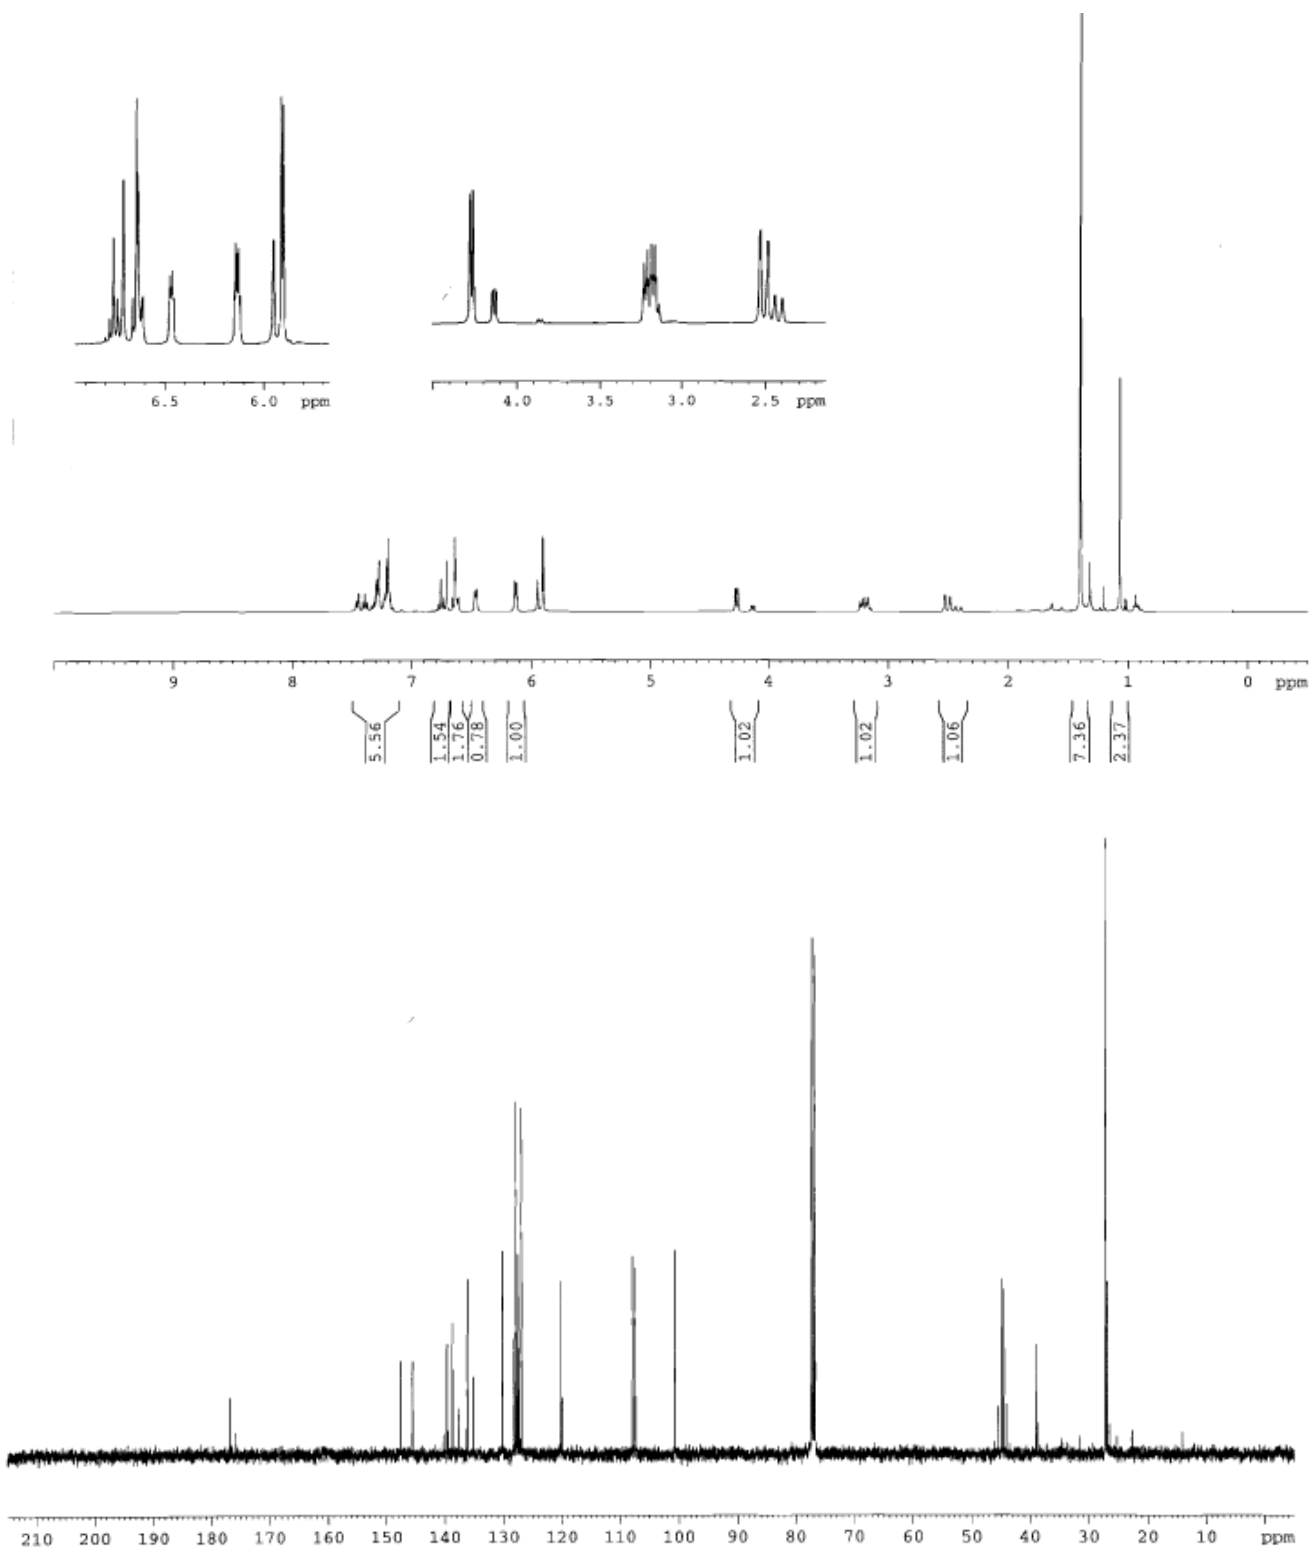

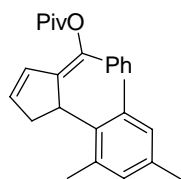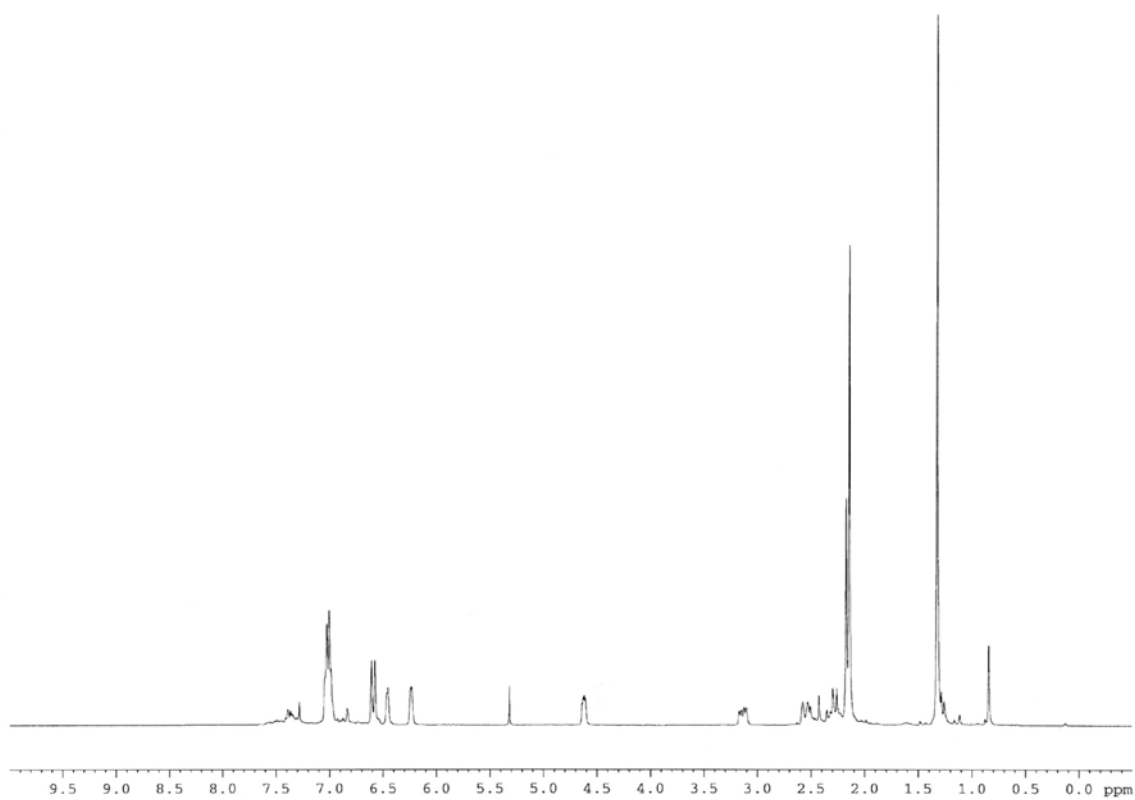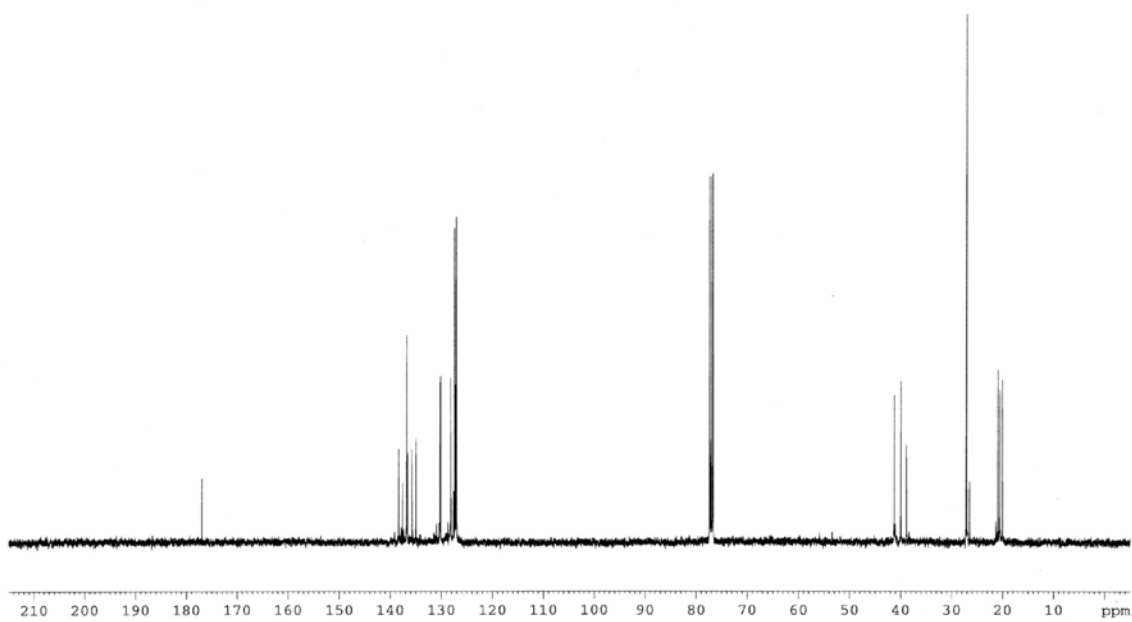

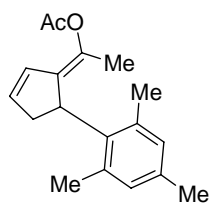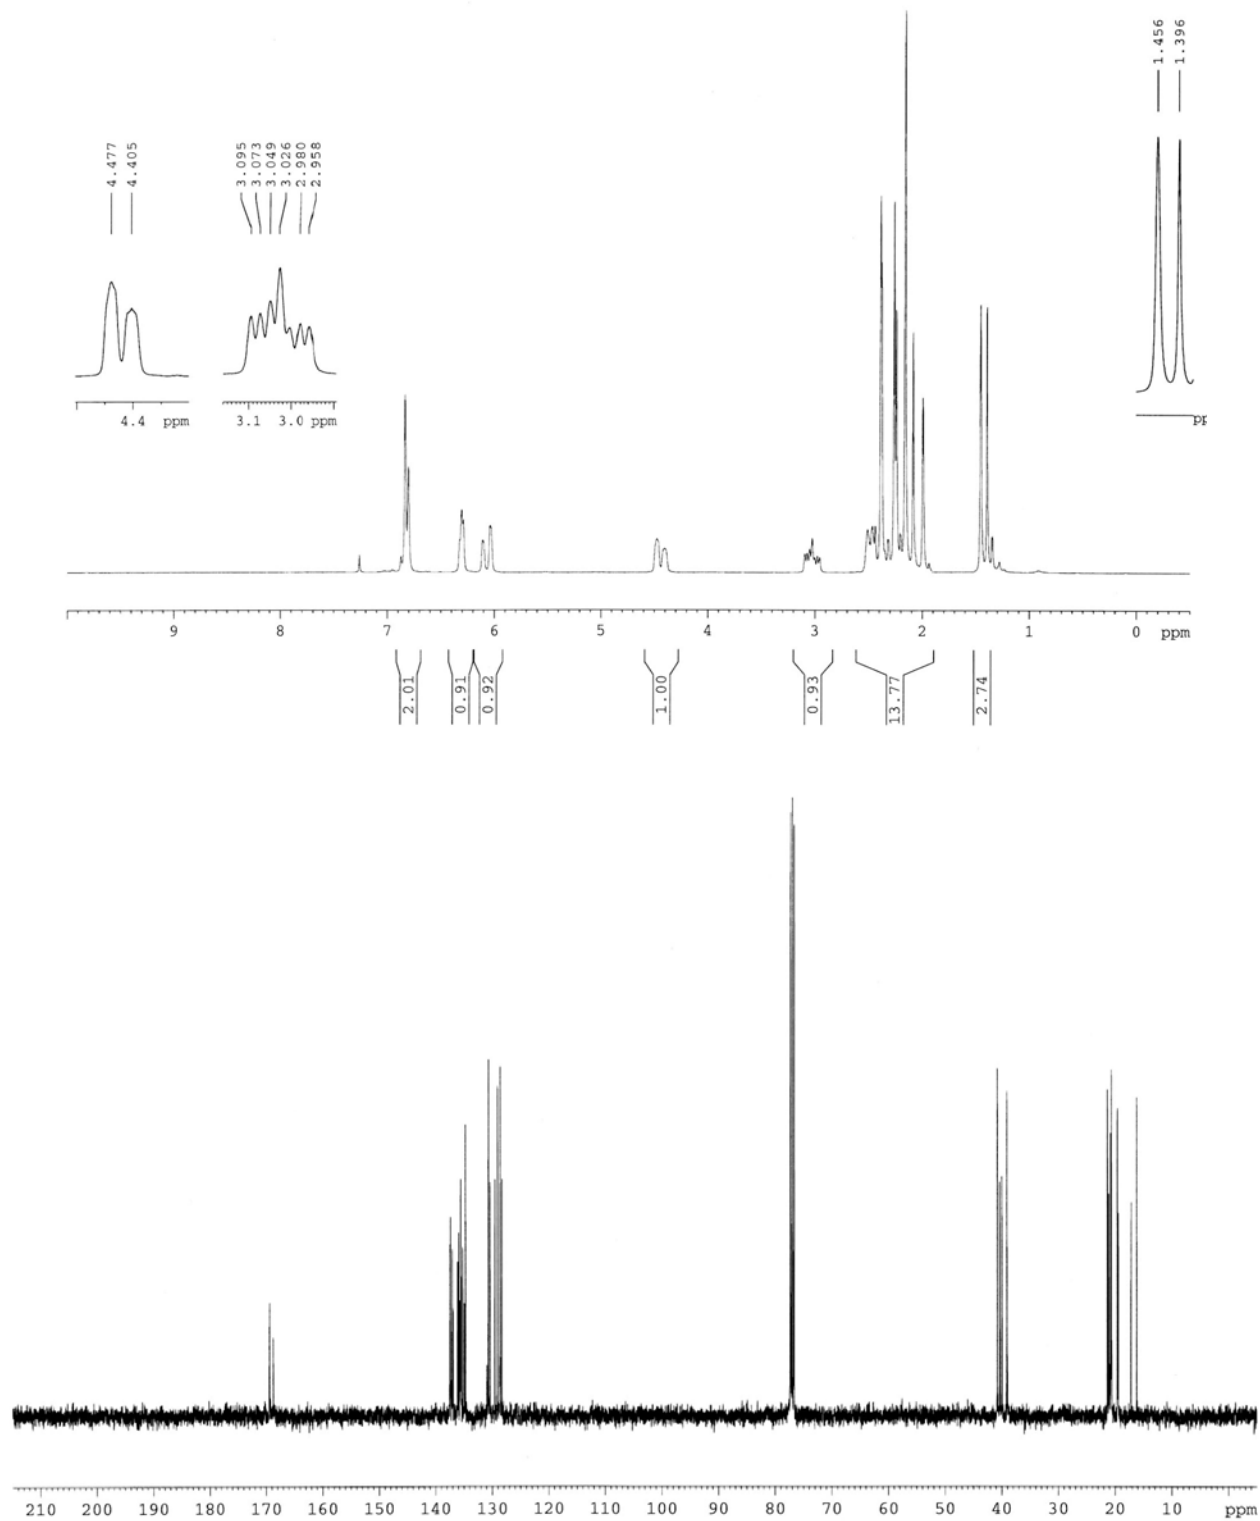

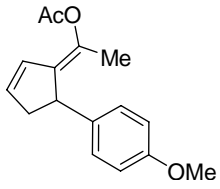

VQ-400 pa0808.053

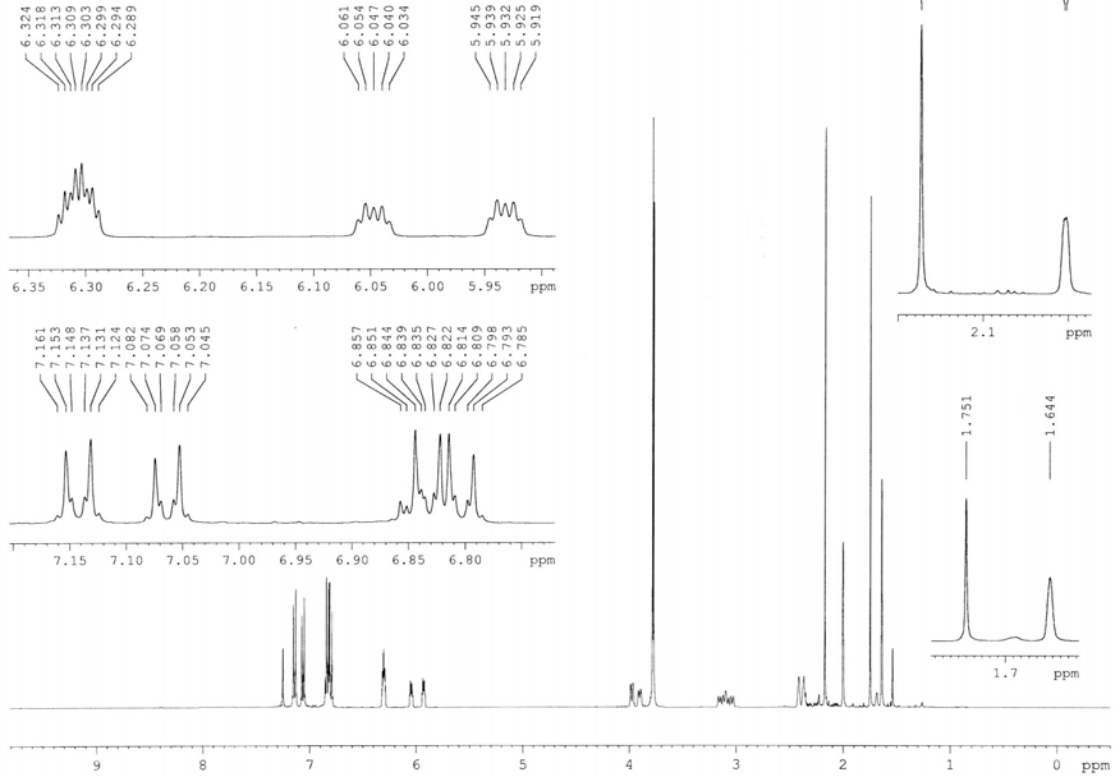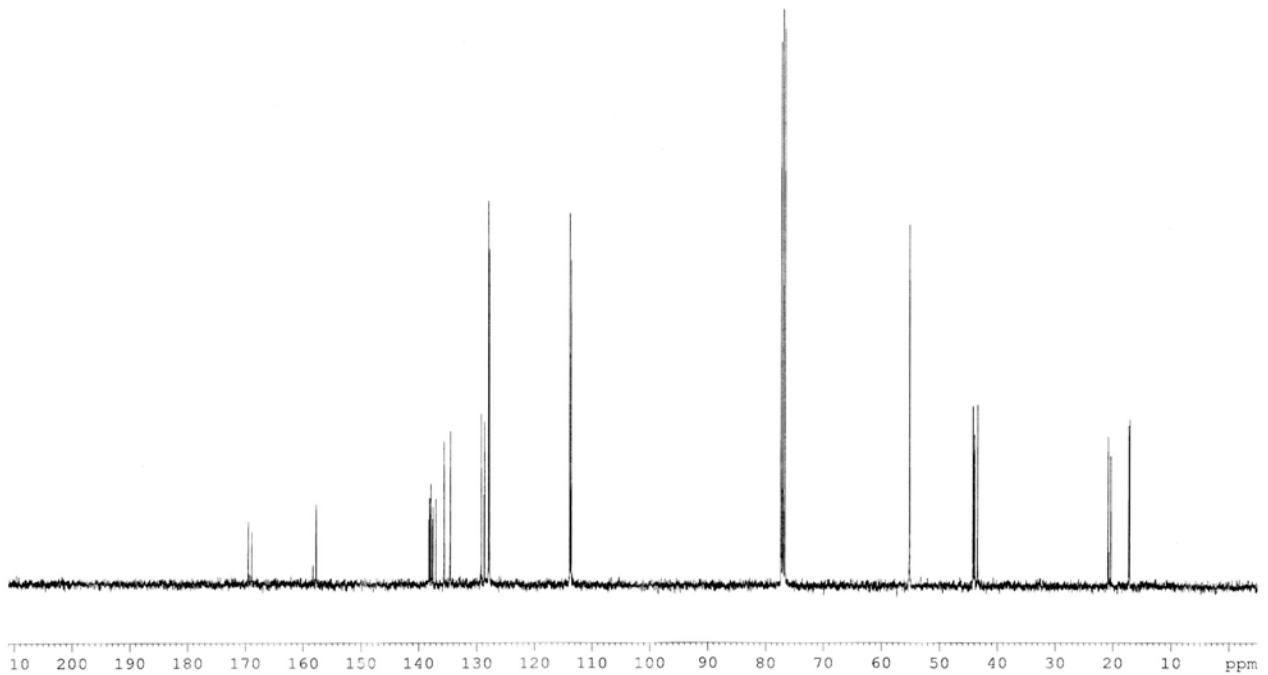

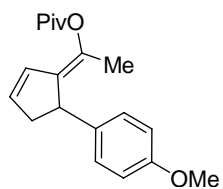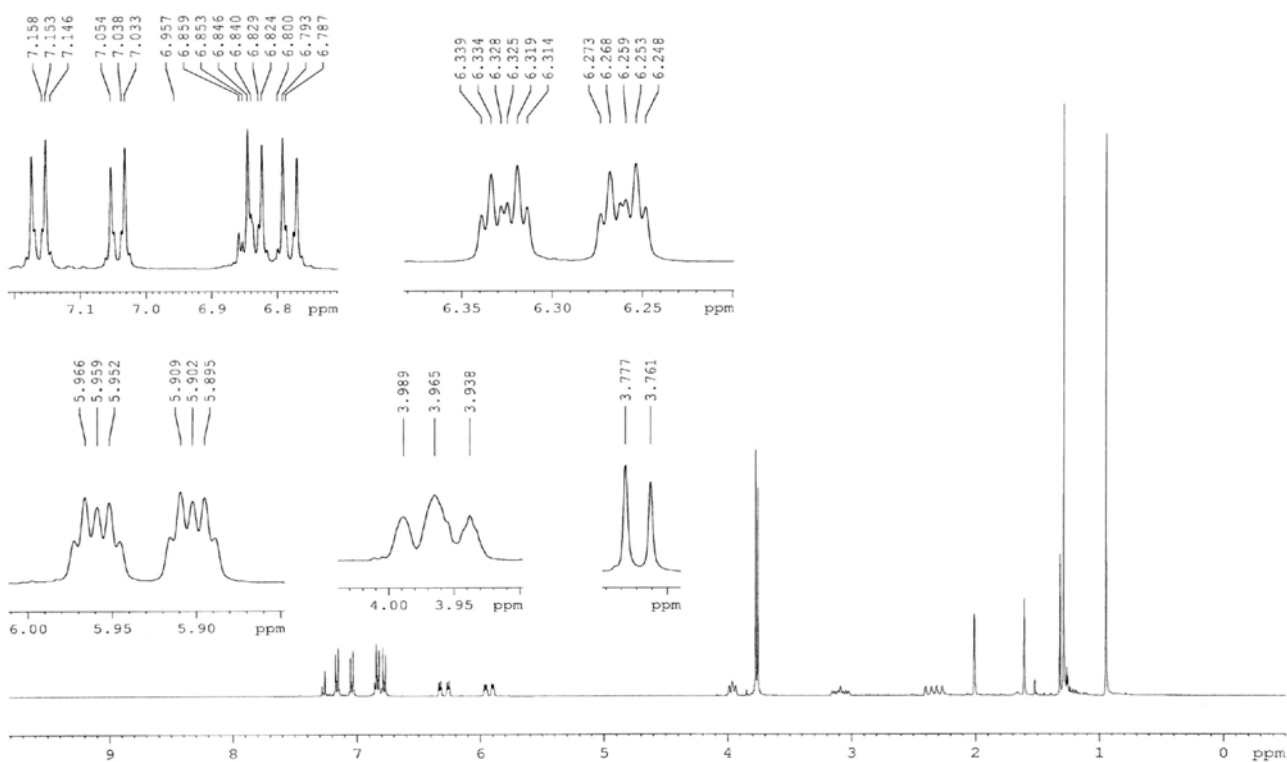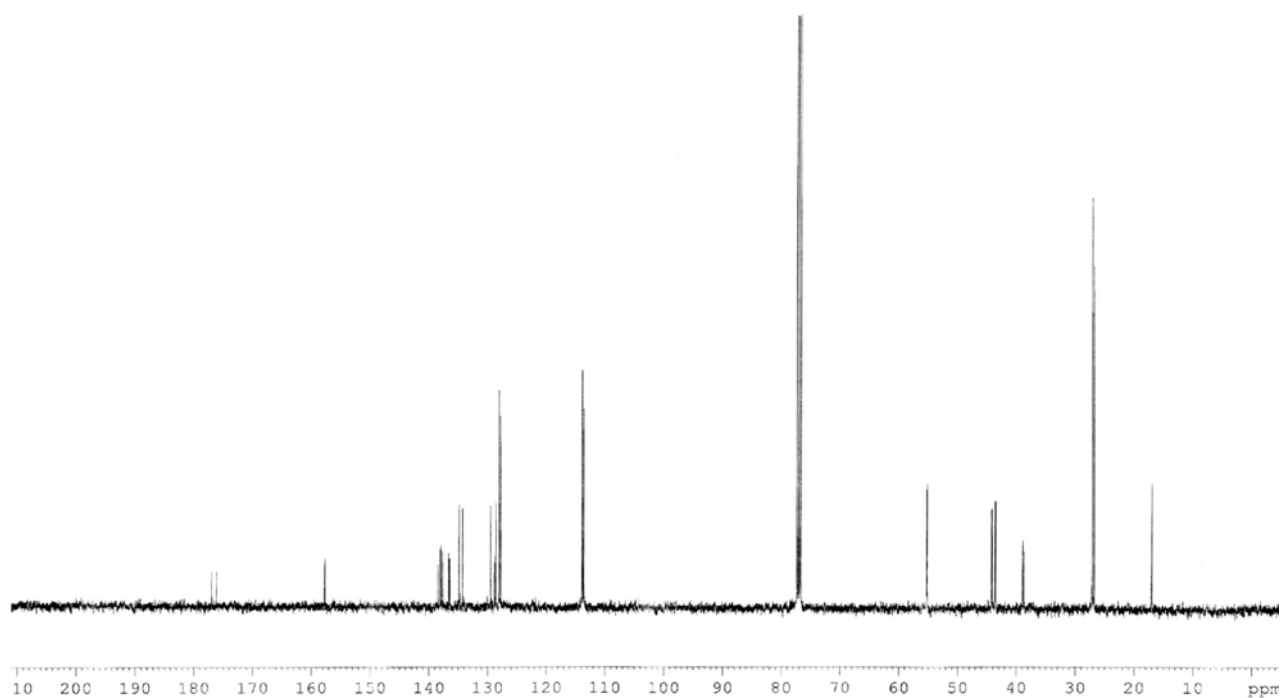

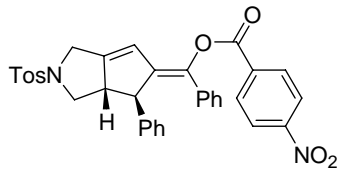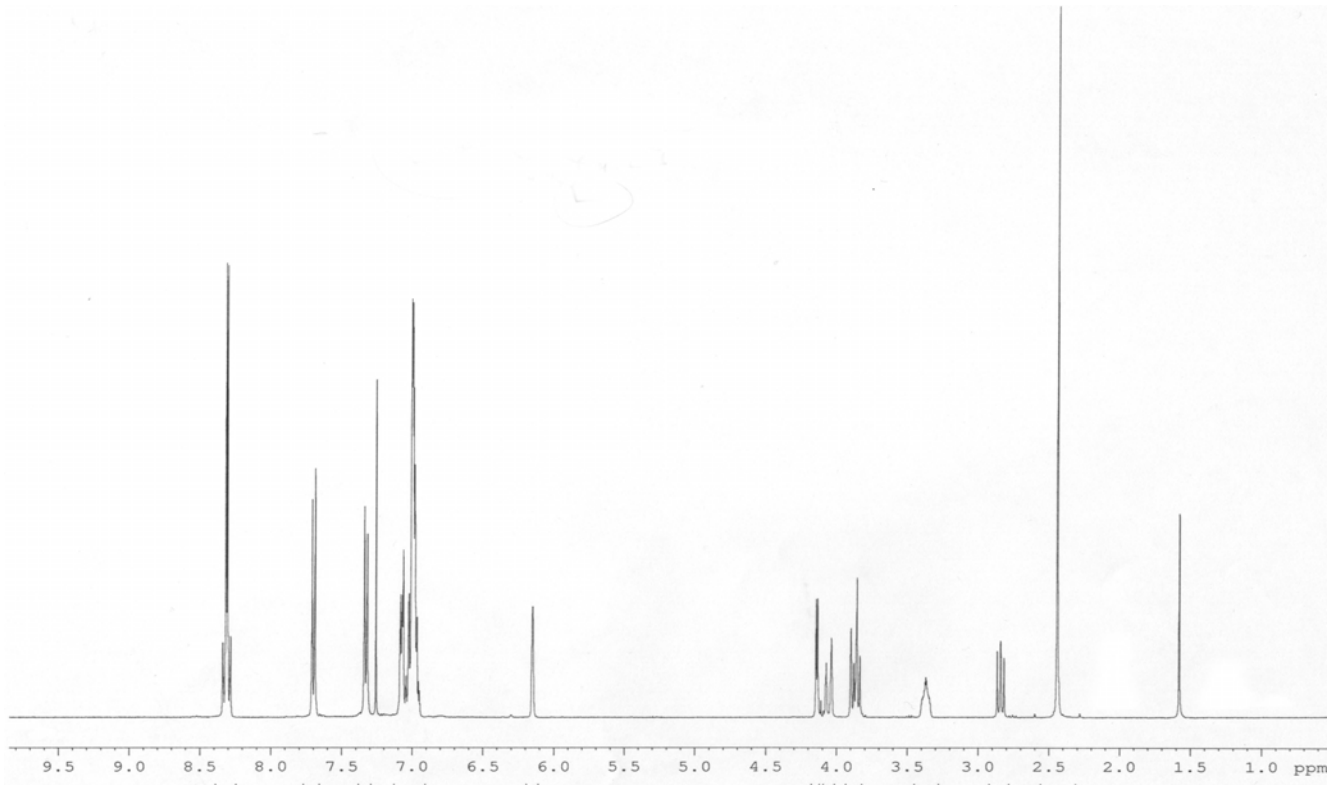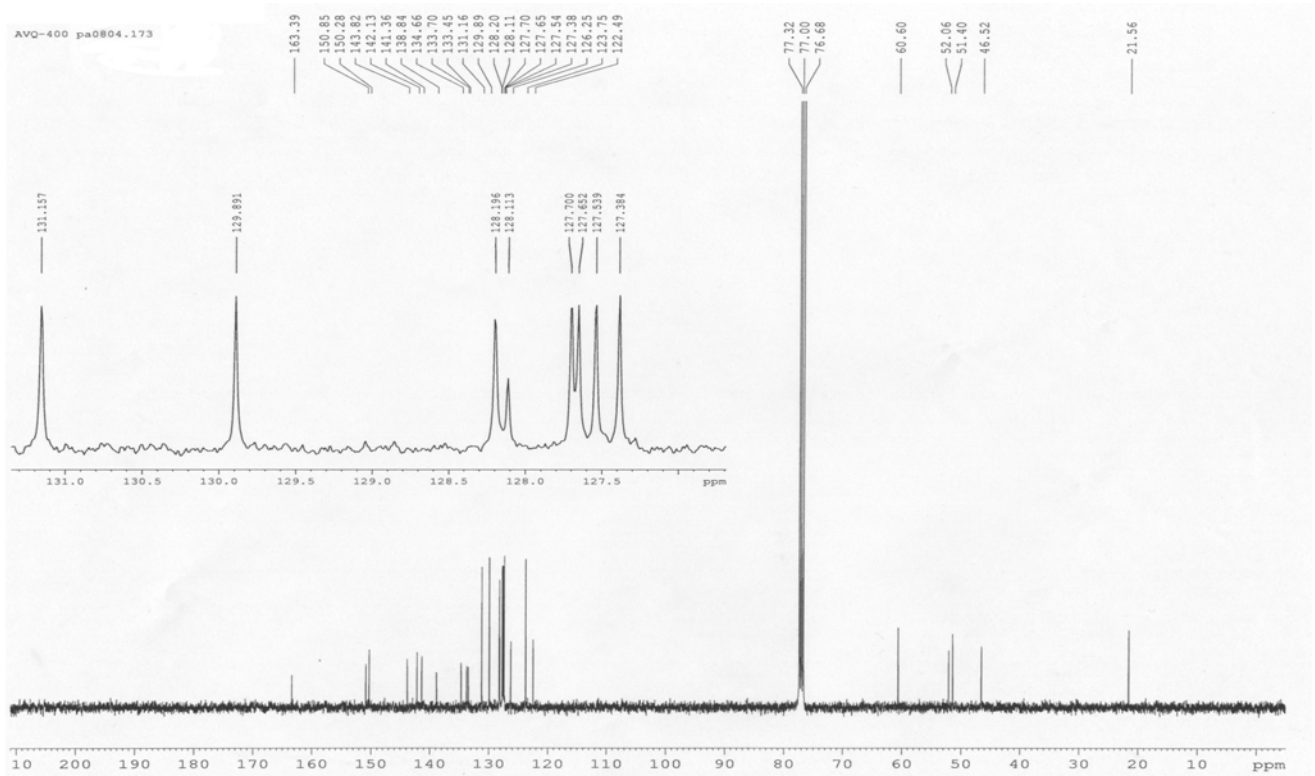

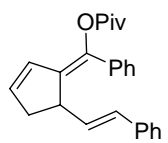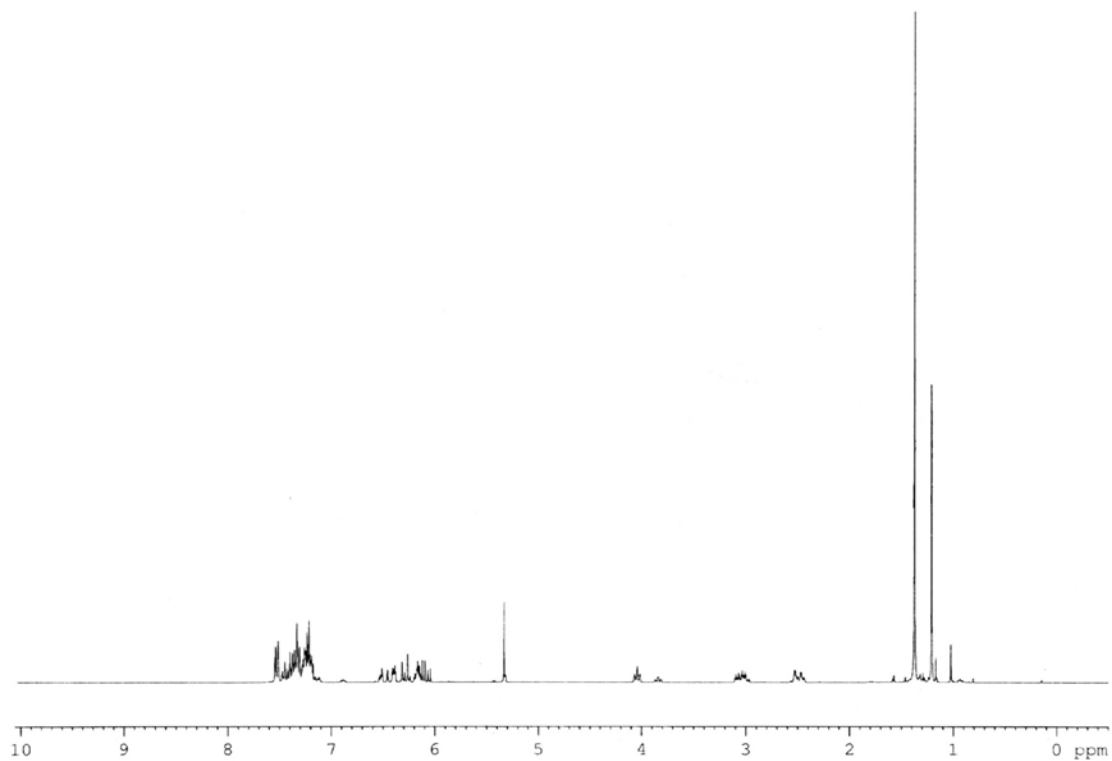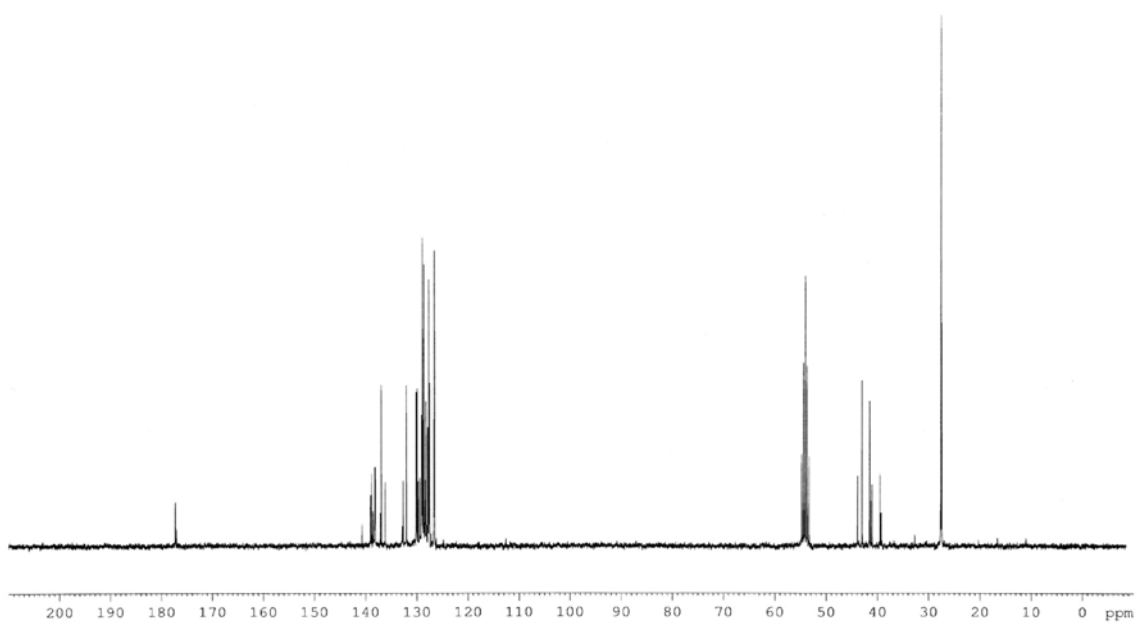

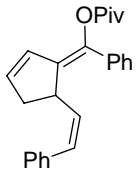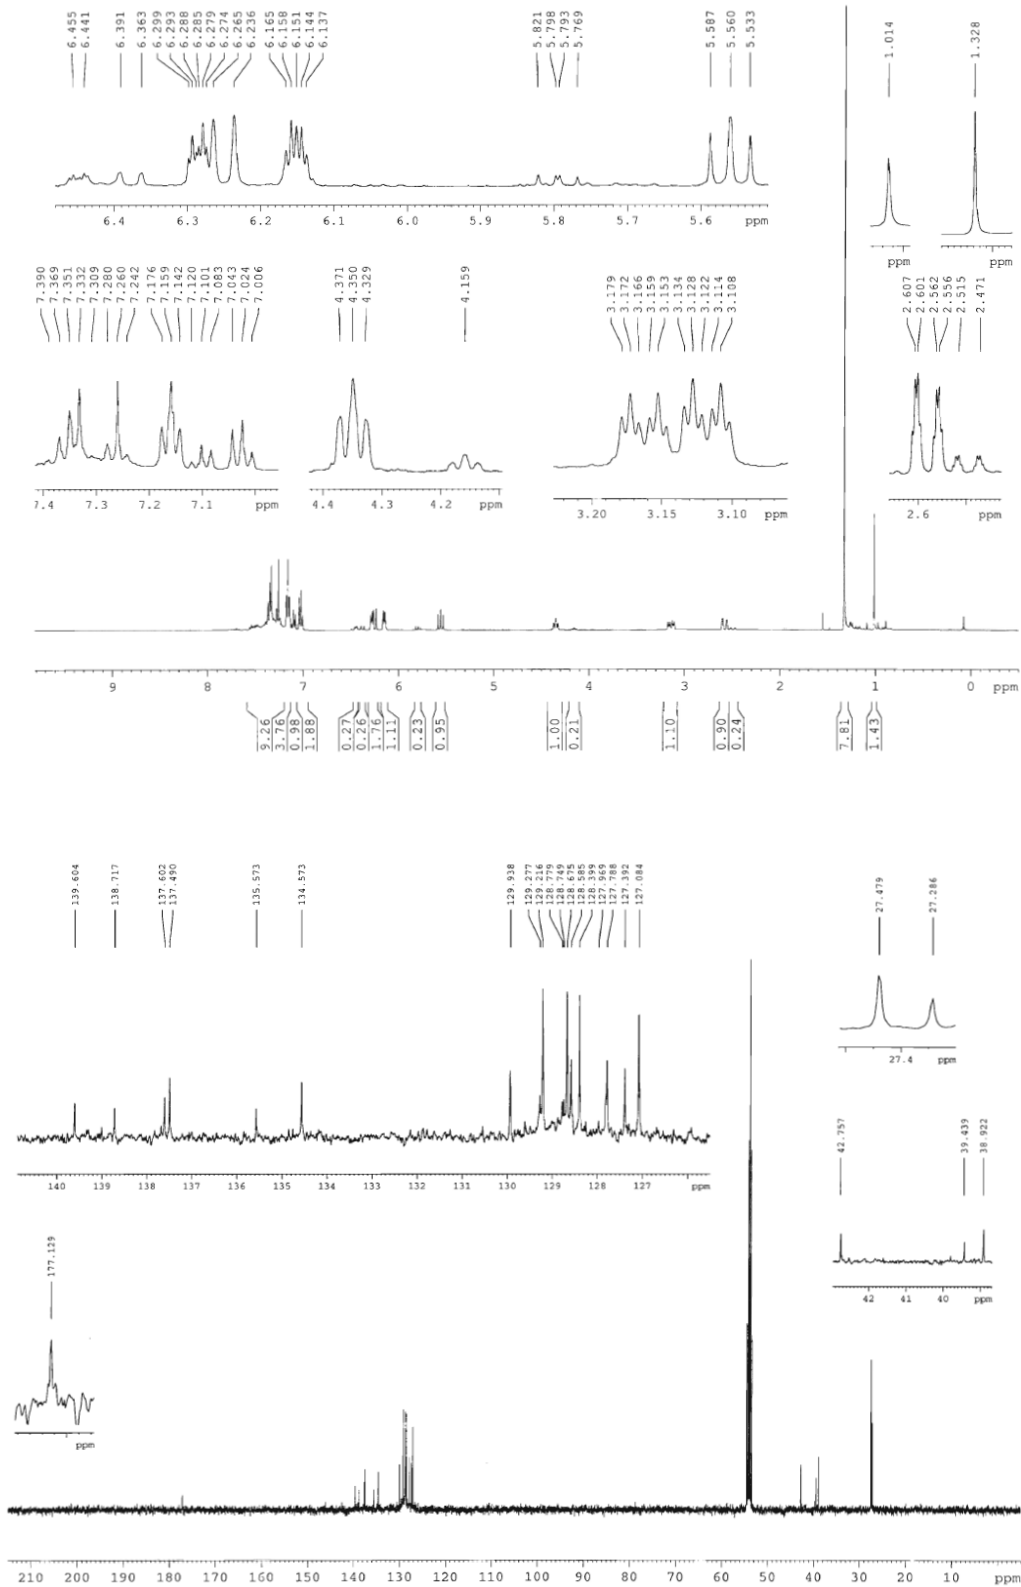



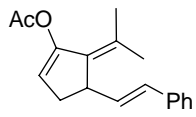

AVB-400 pa11.141

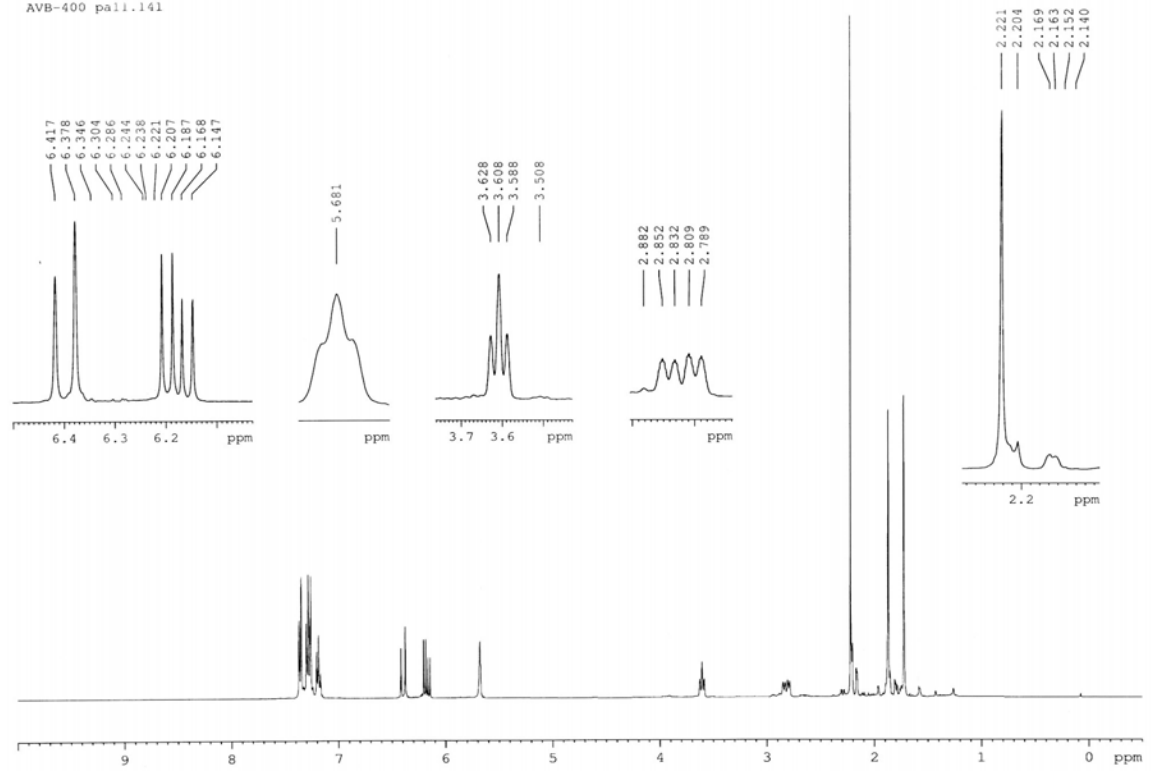

AVB-400 pa11.145

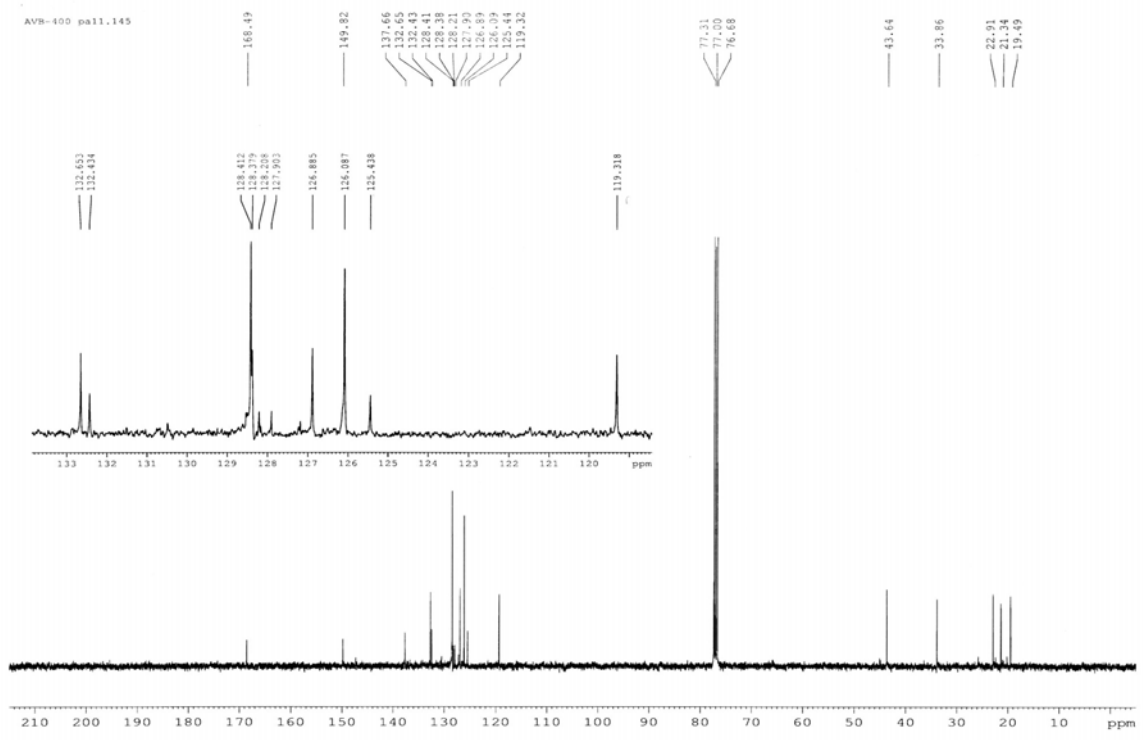

## 2D studies on cyclopentene 36: COSY

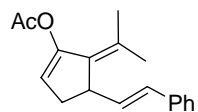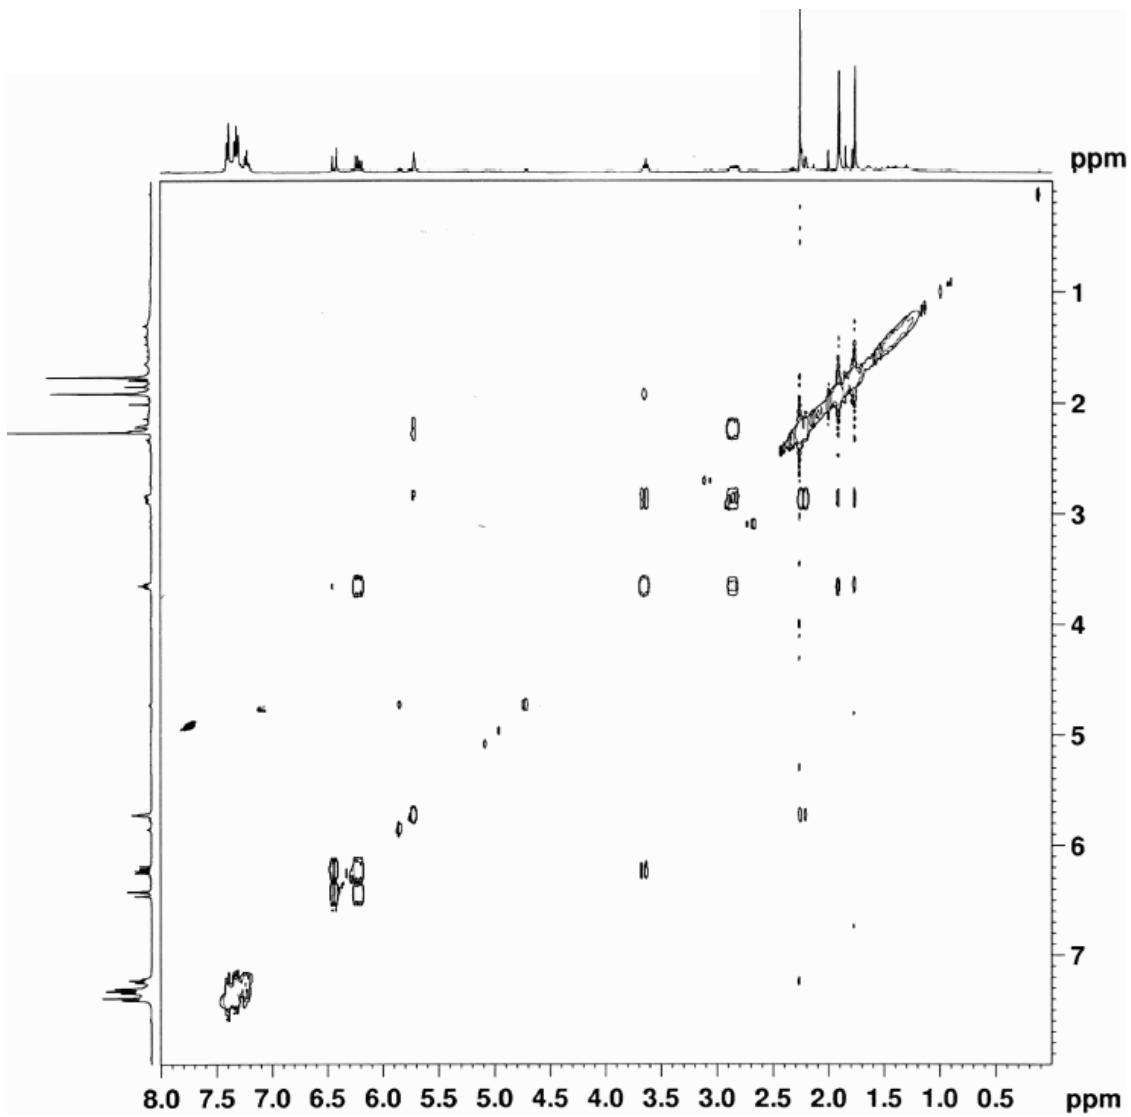

## 2D studies on cyclopentene 36: COSY

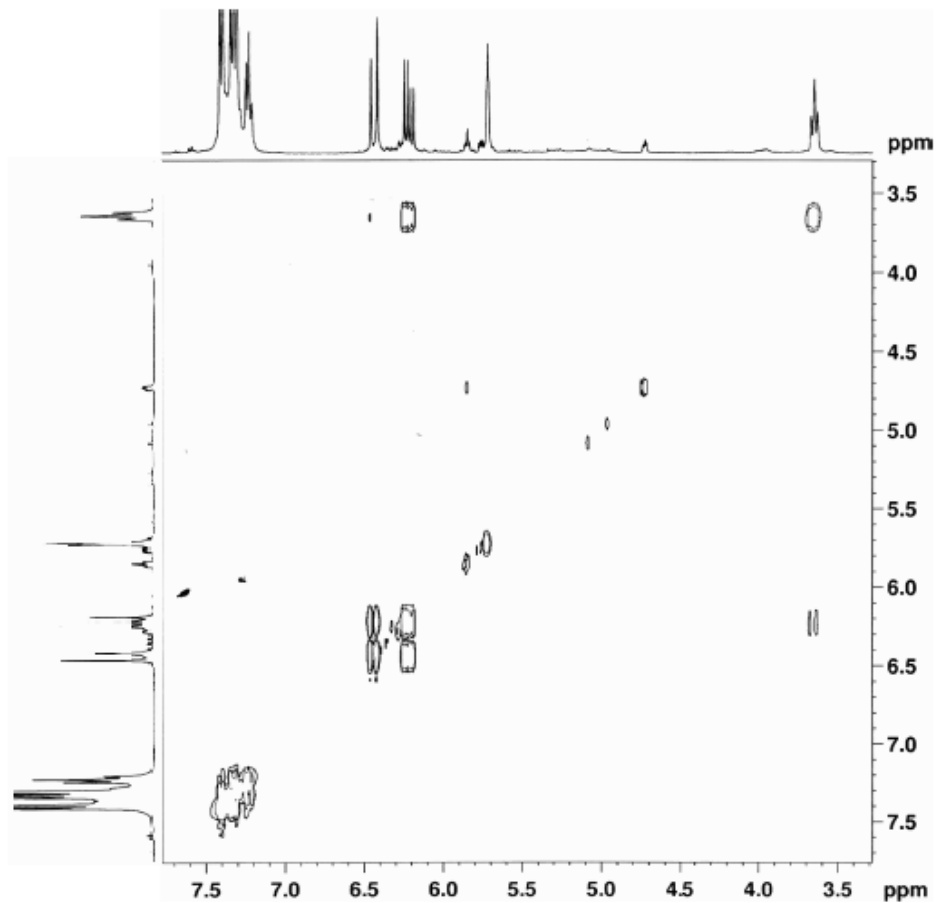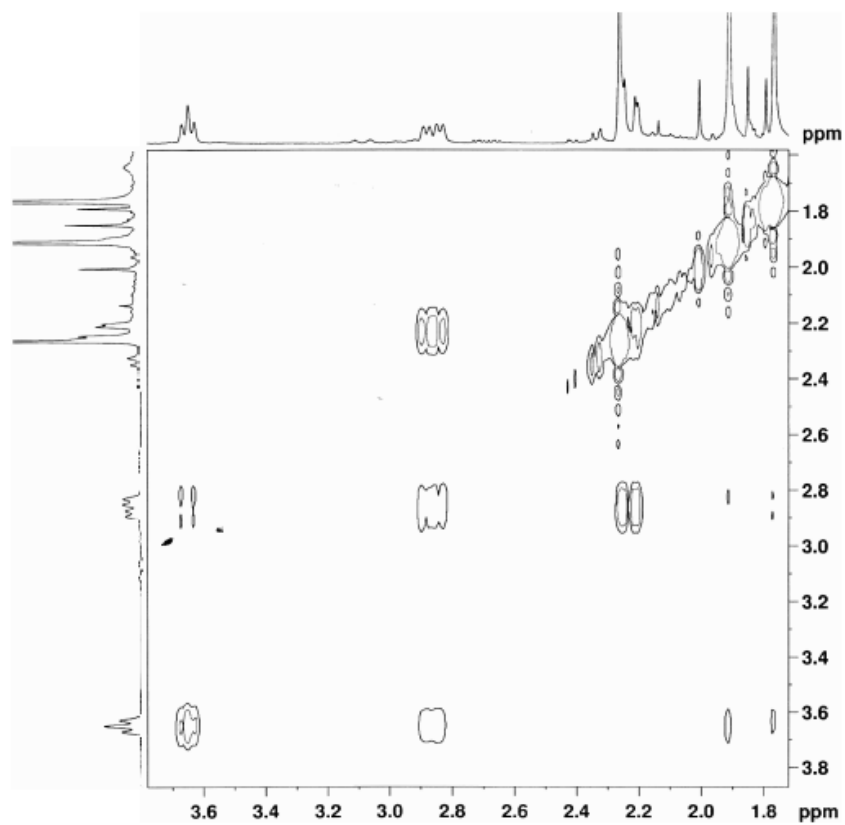

## 2D studies on cyclopentene 36: HMQC

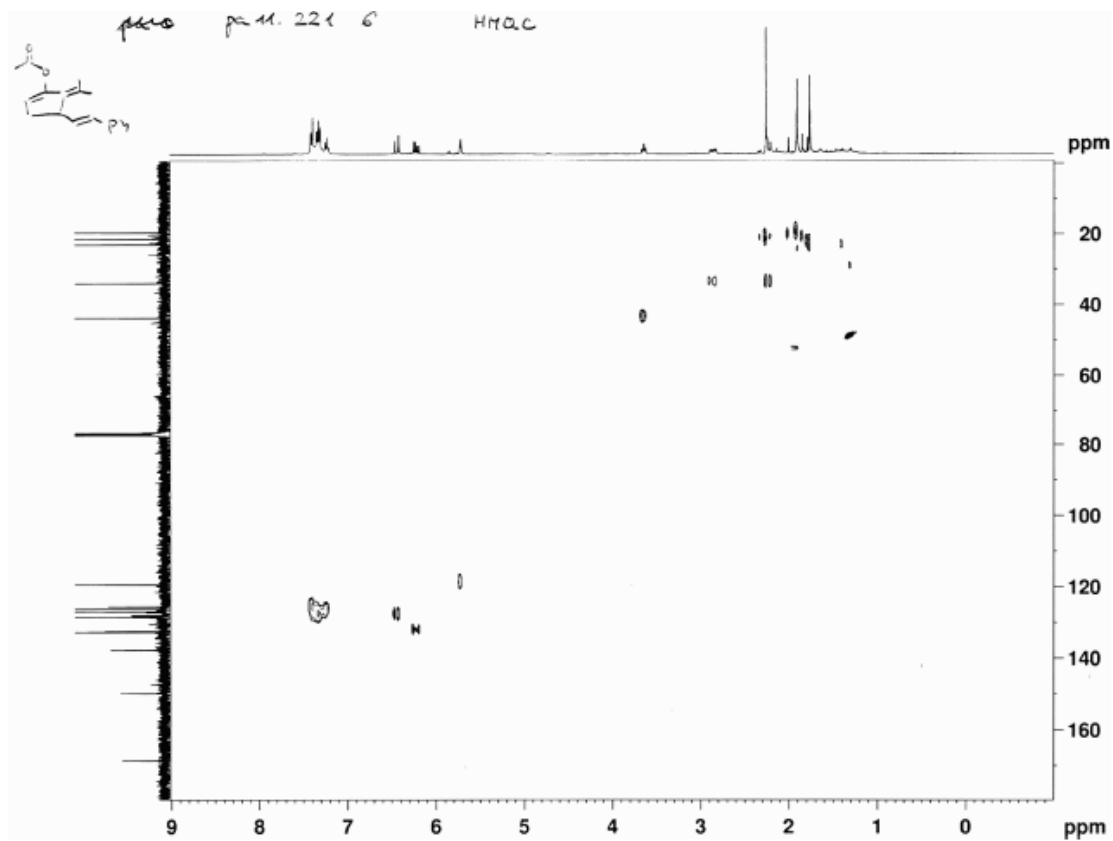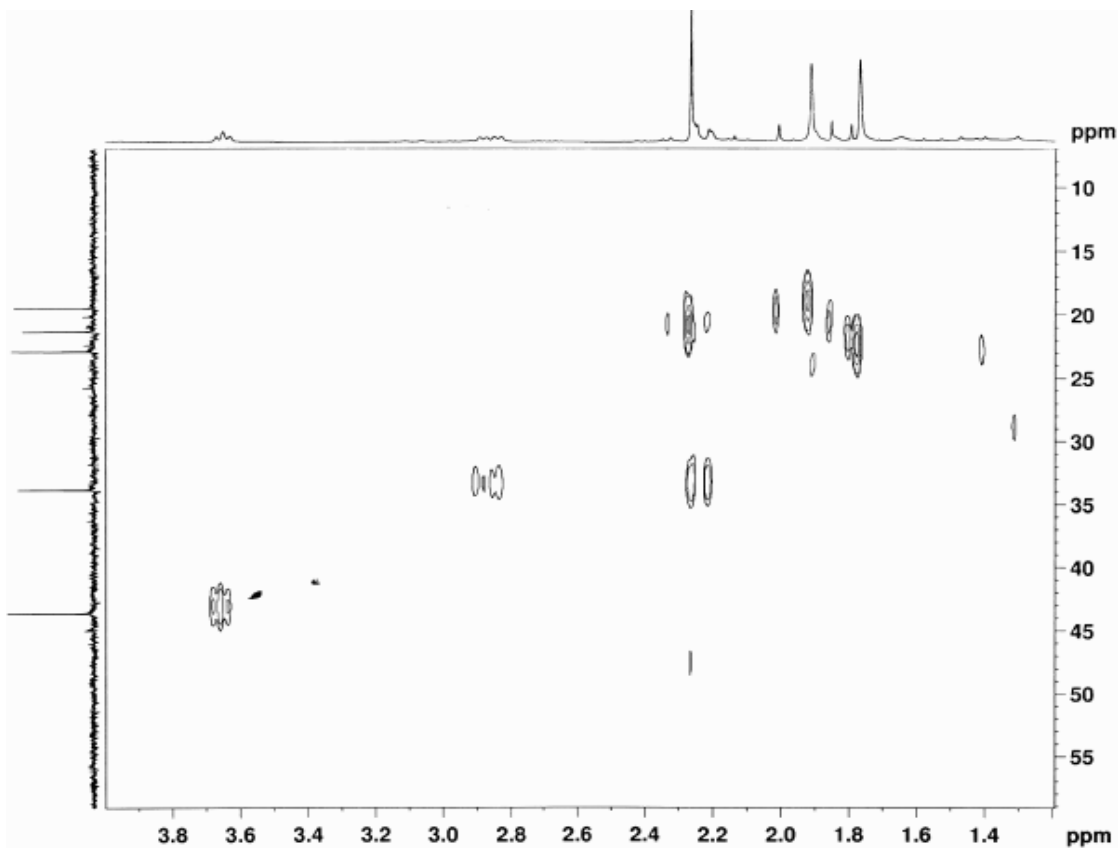

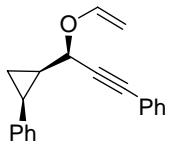

AVB- 400 pa0710.0:1

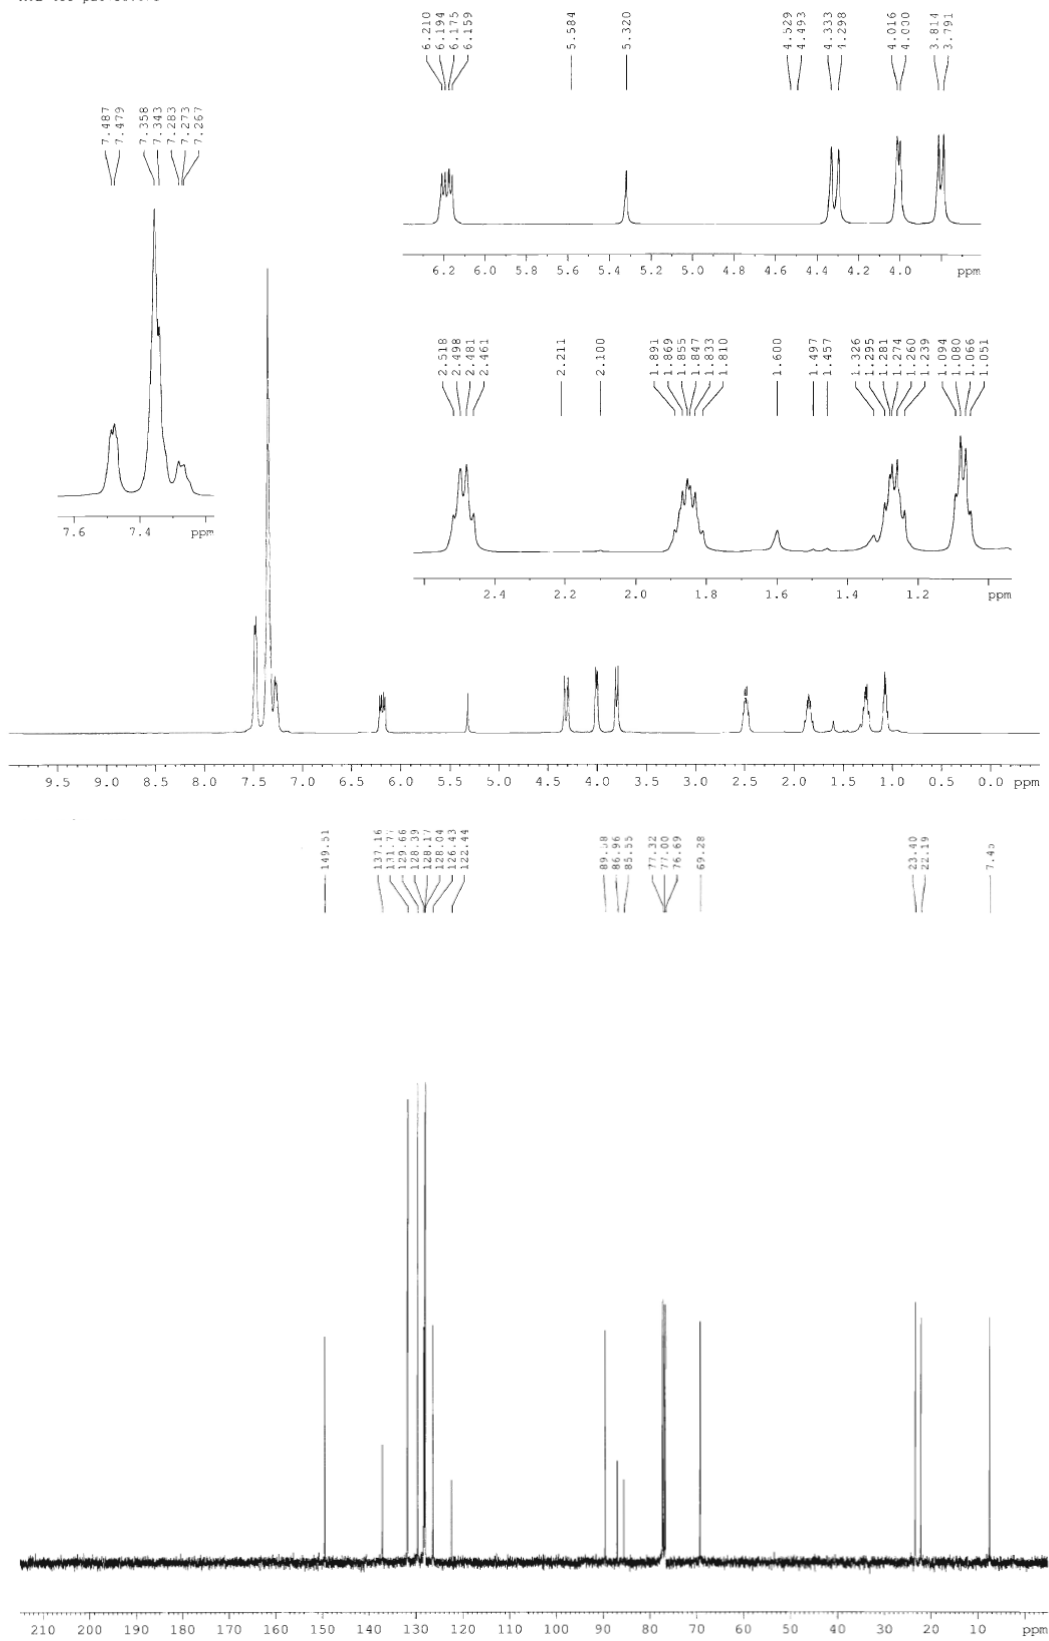

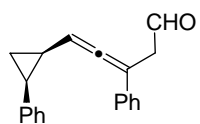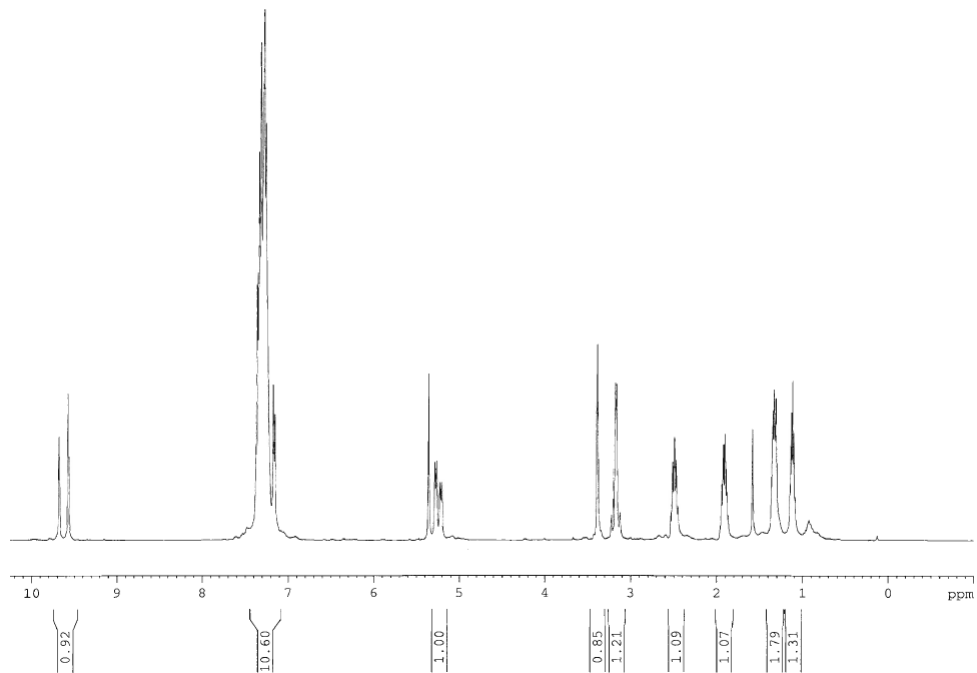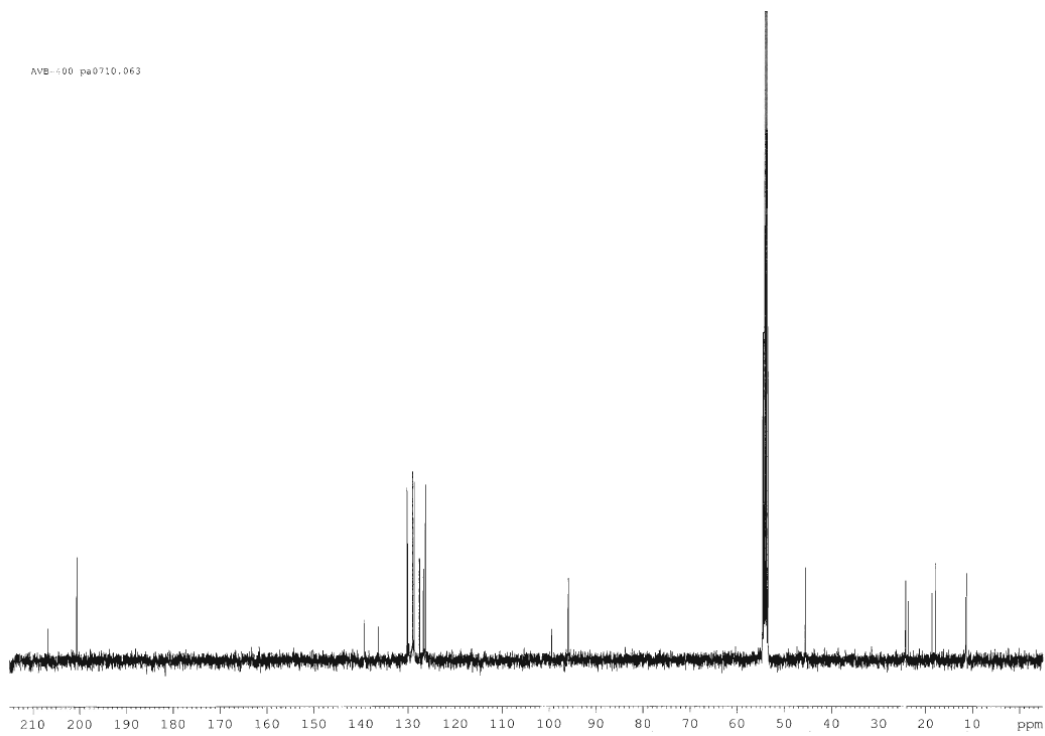

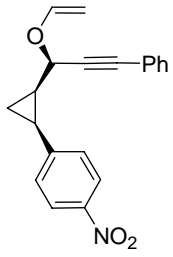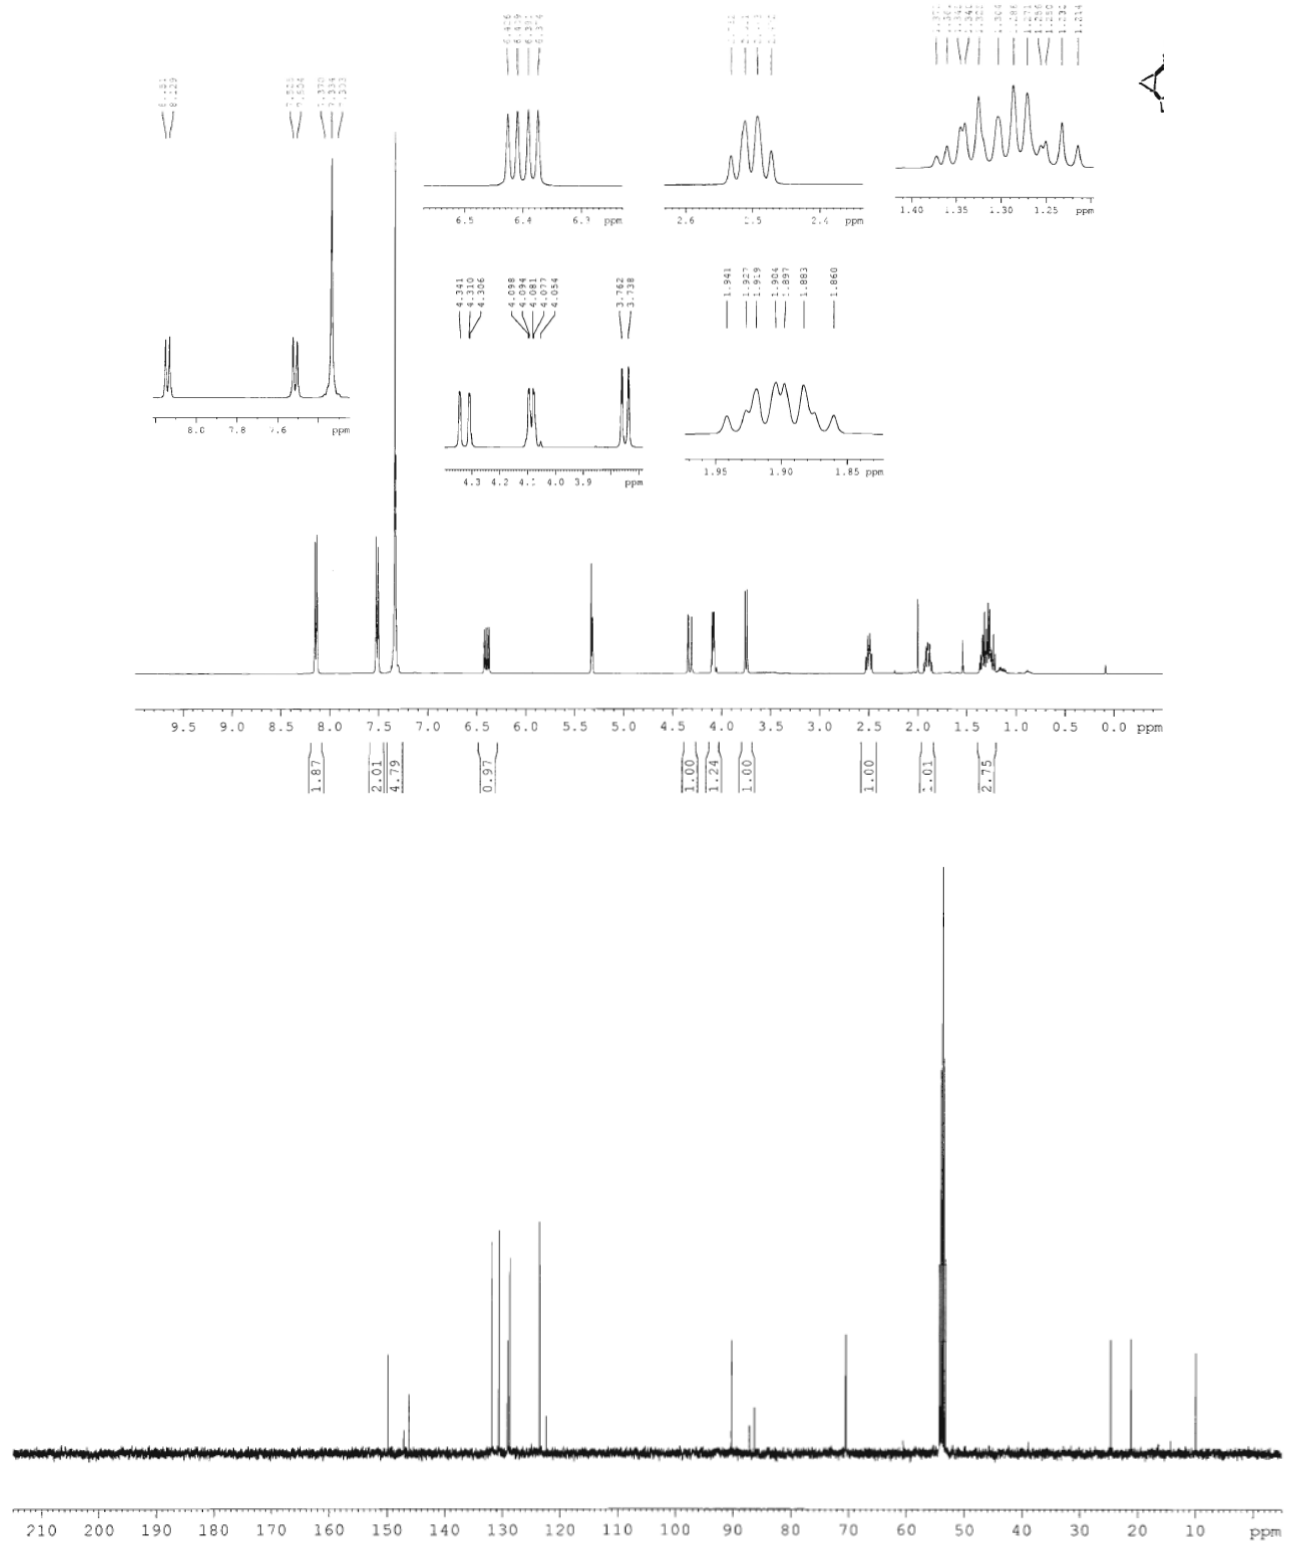

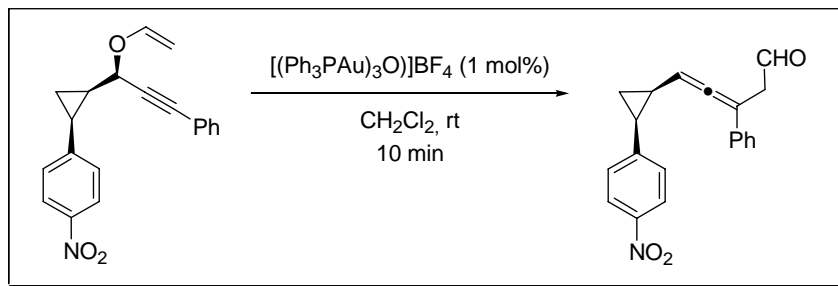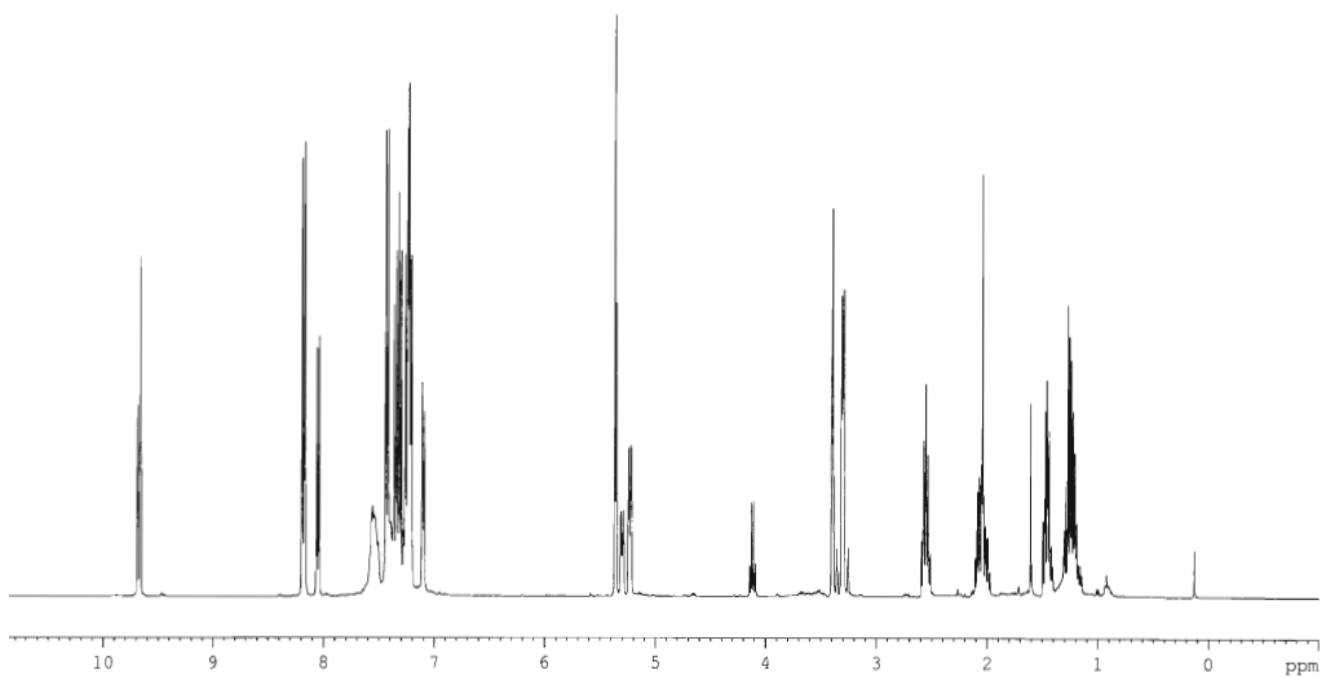



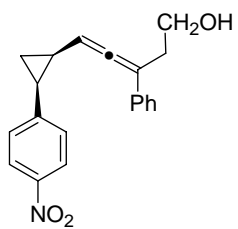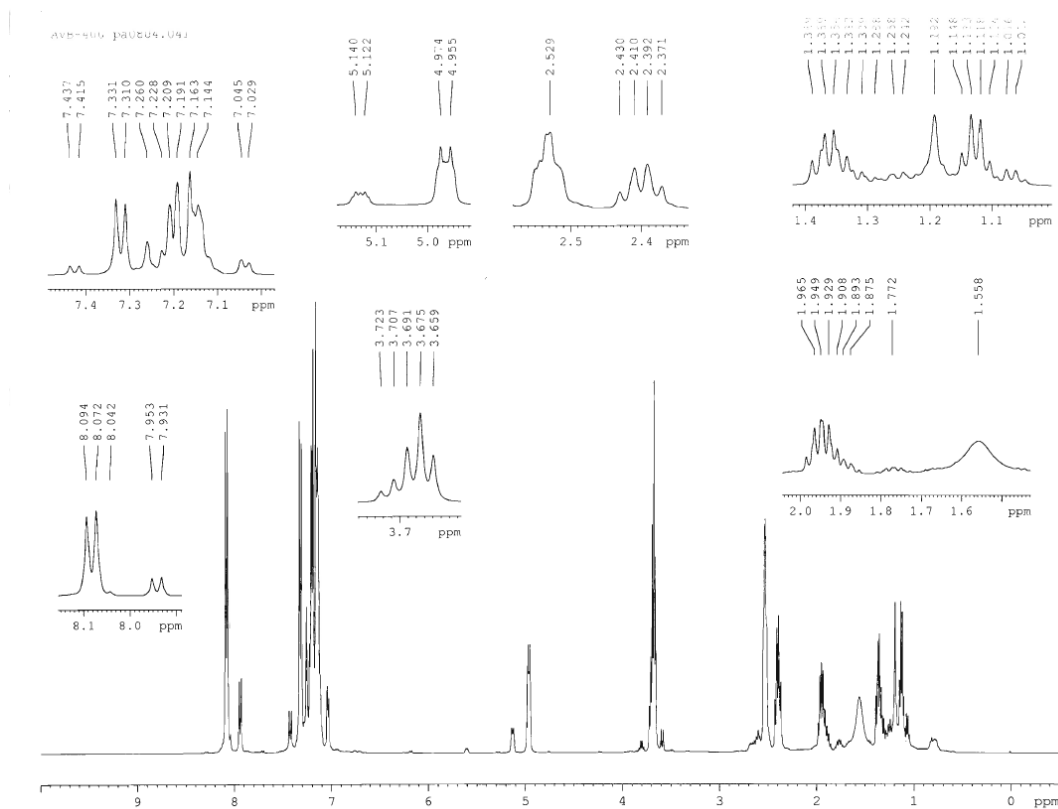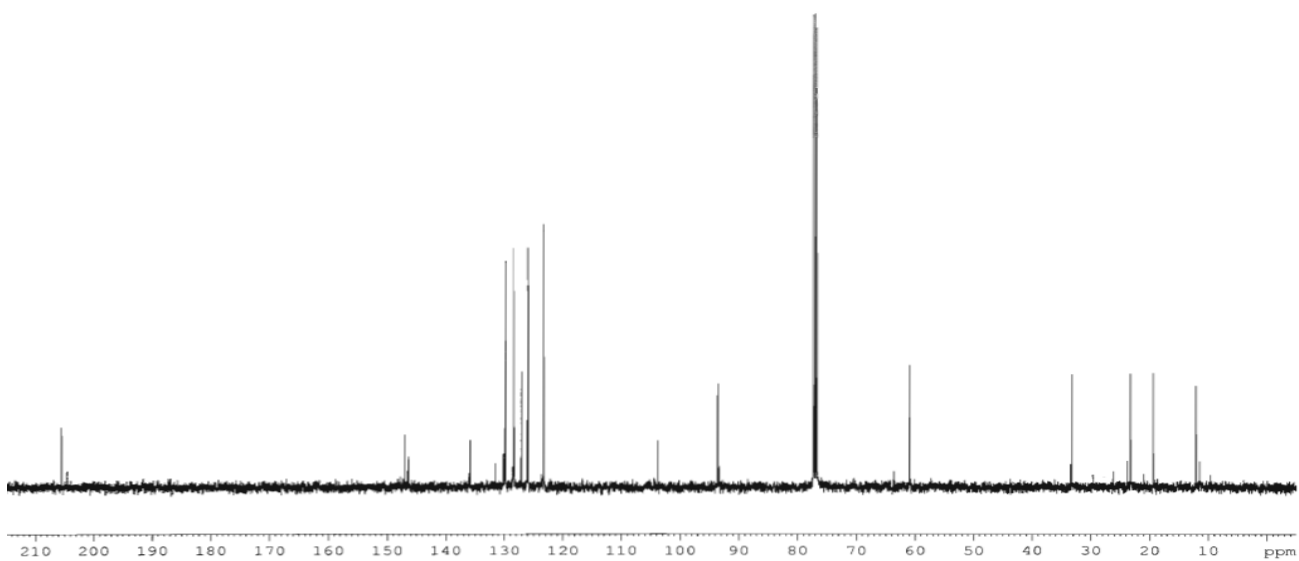

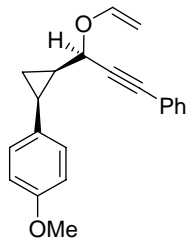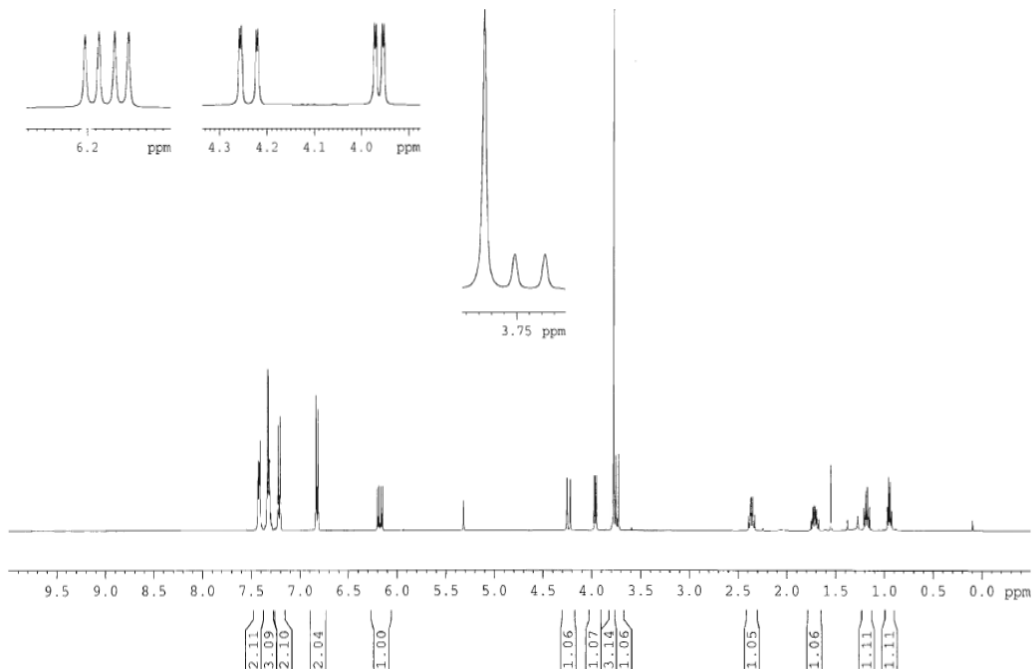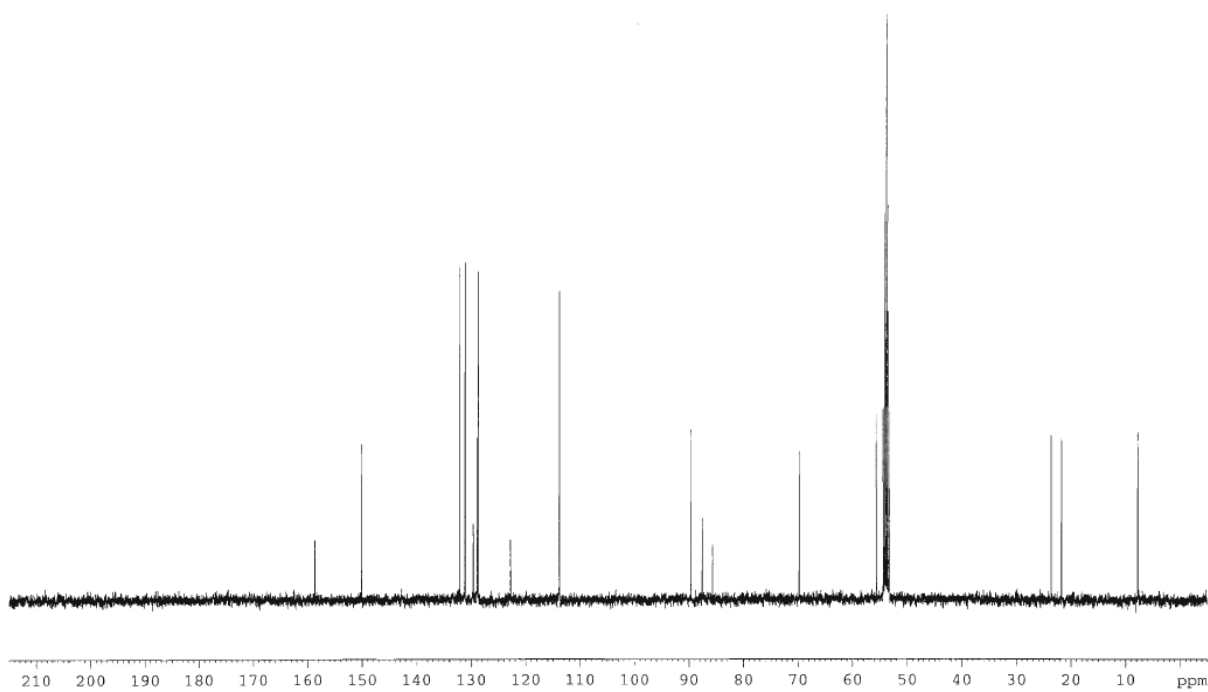

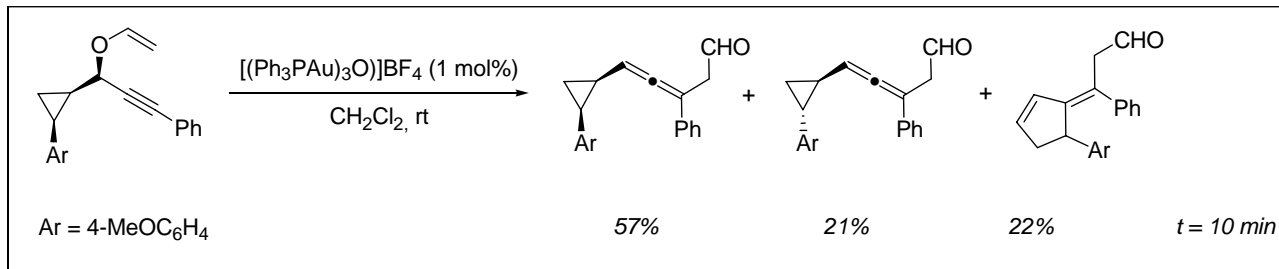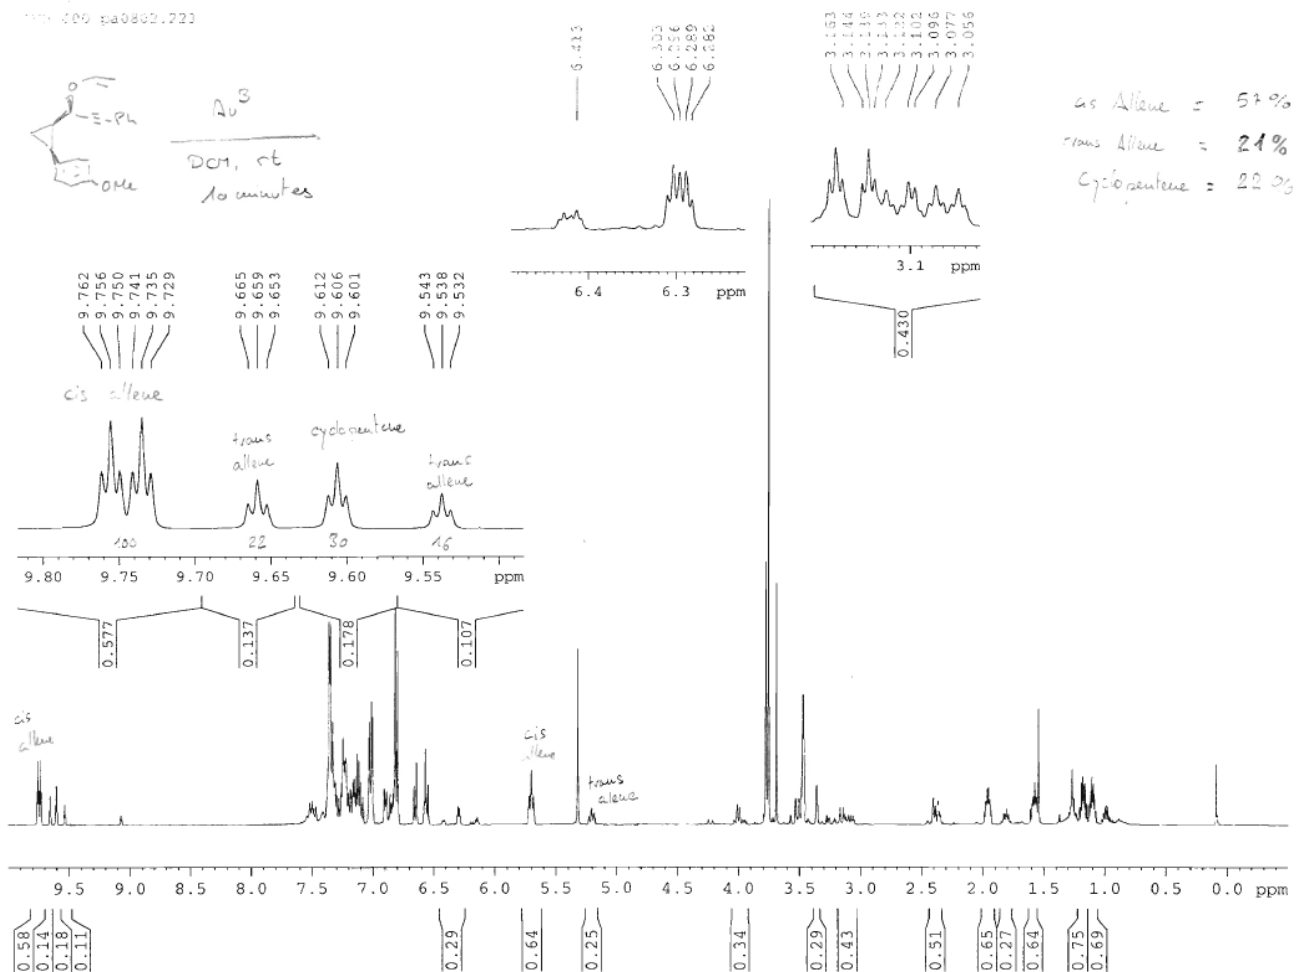

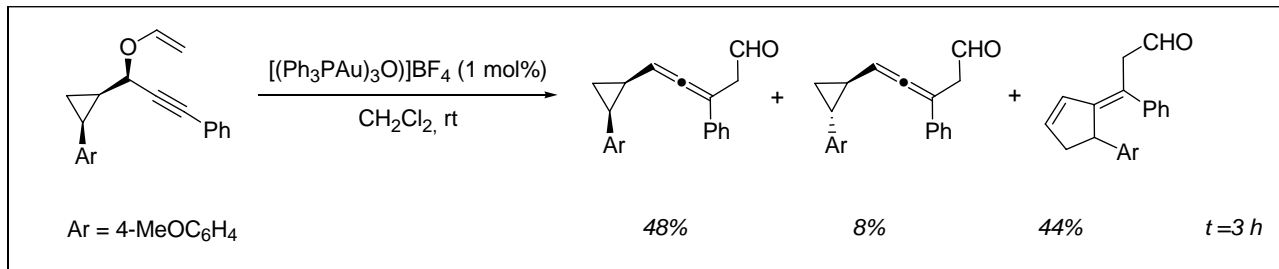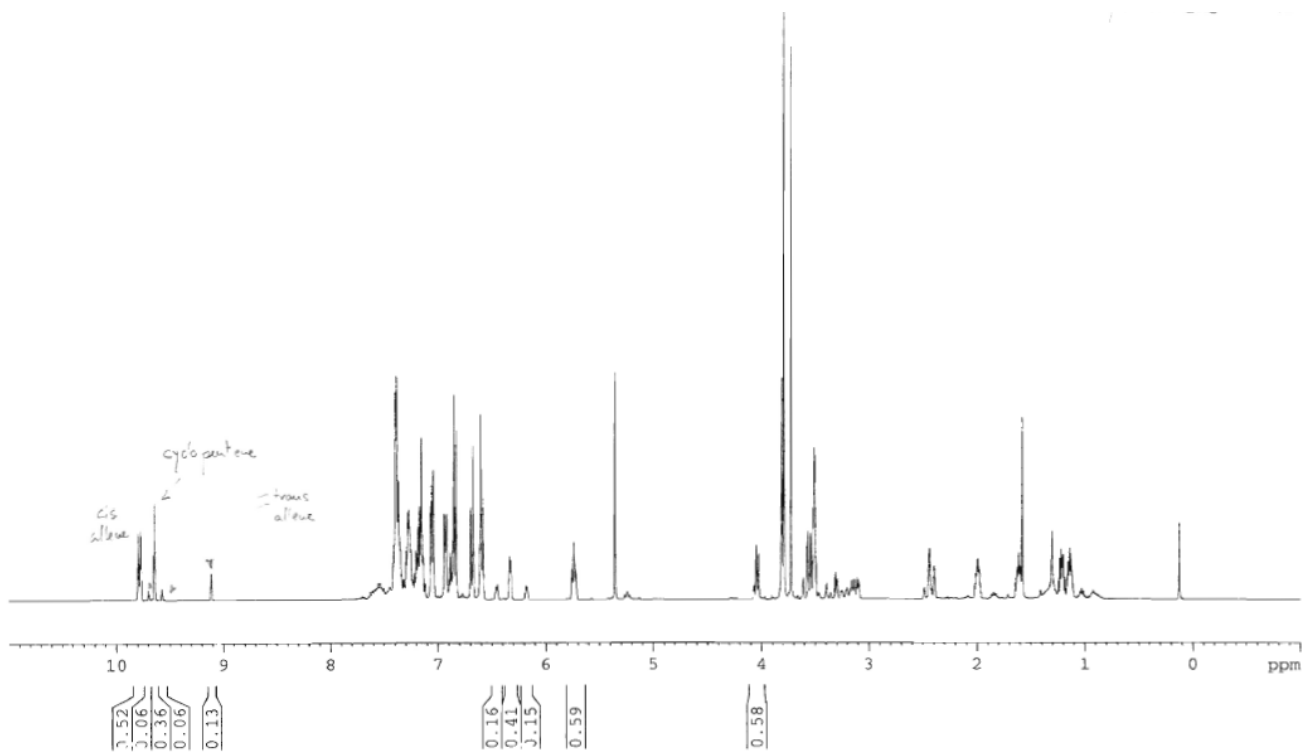

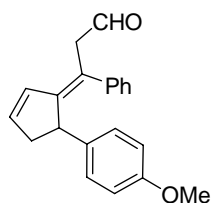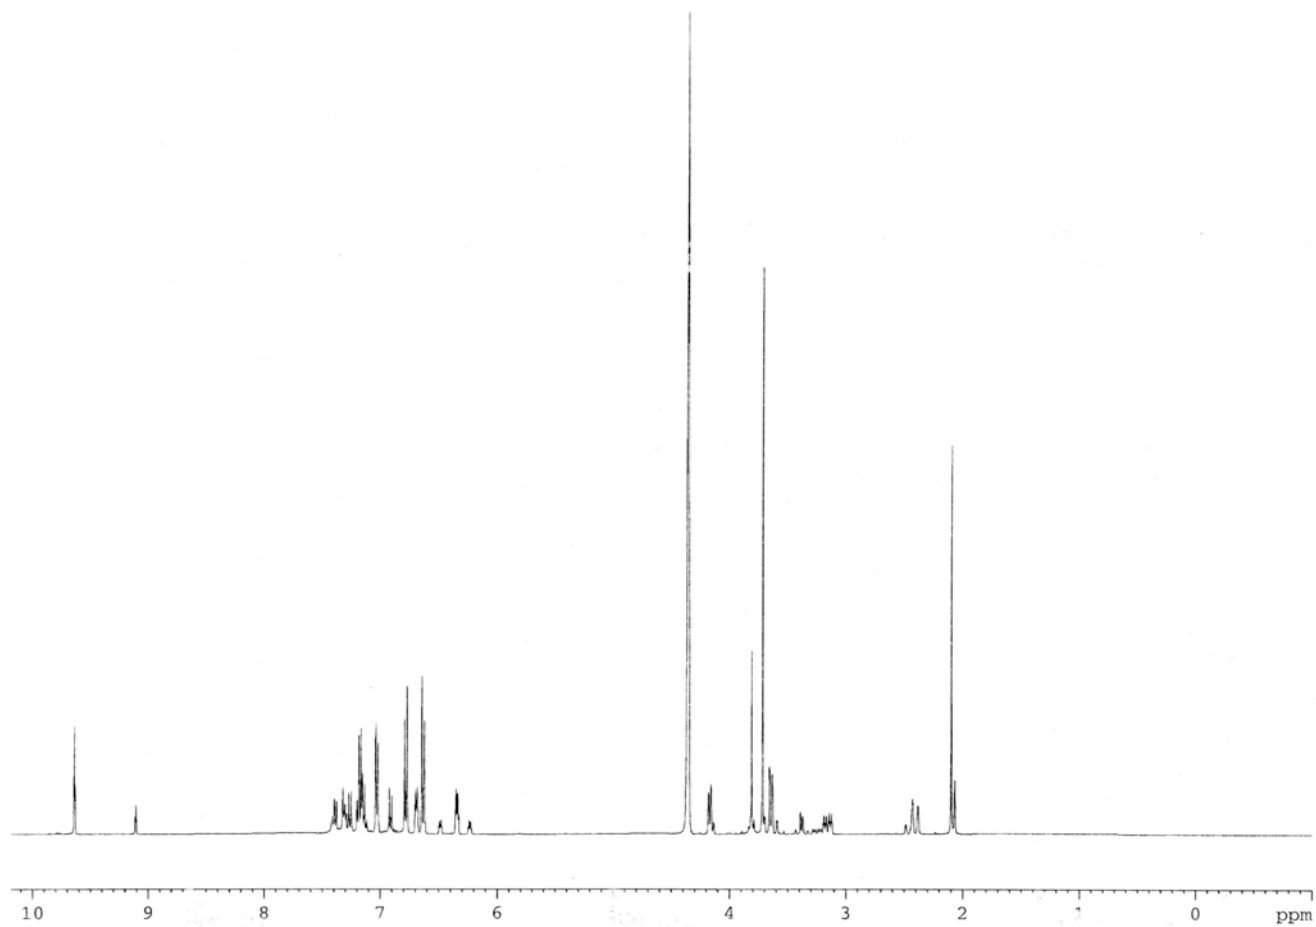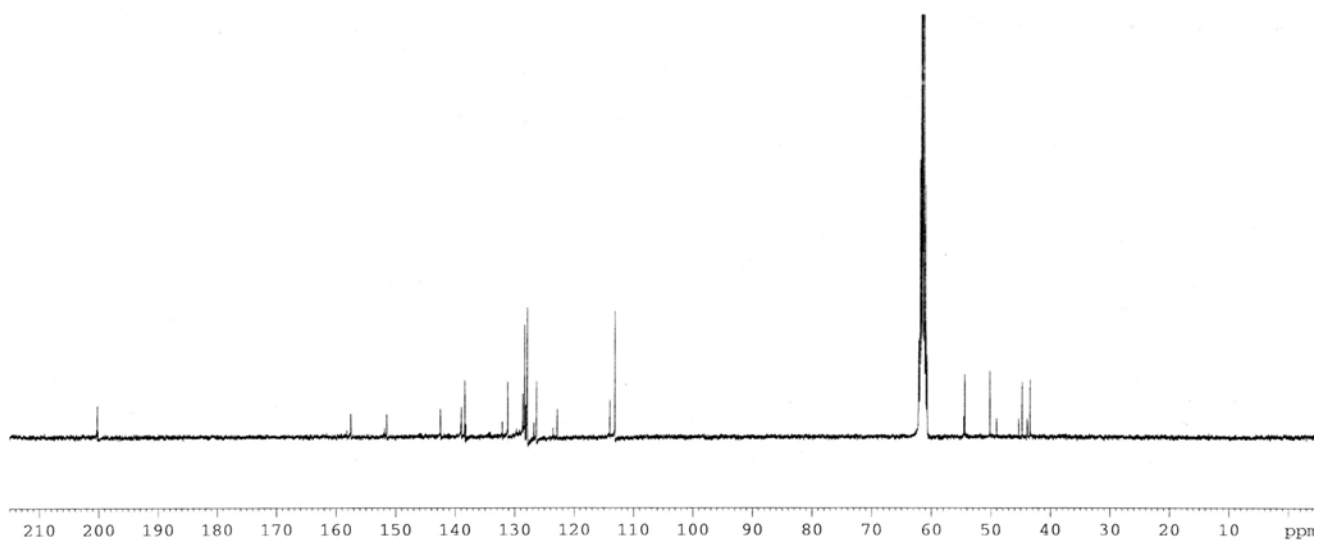

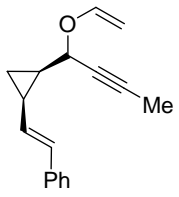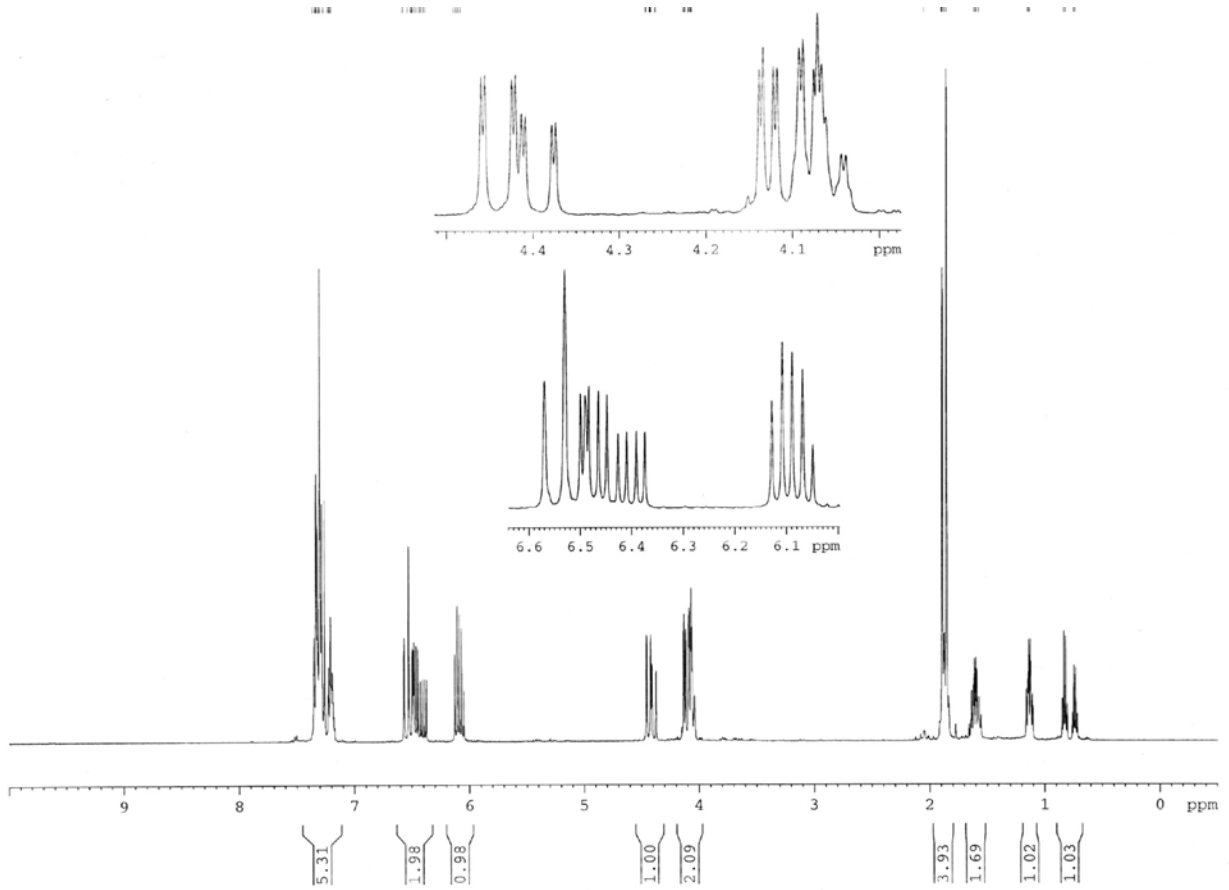

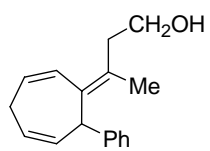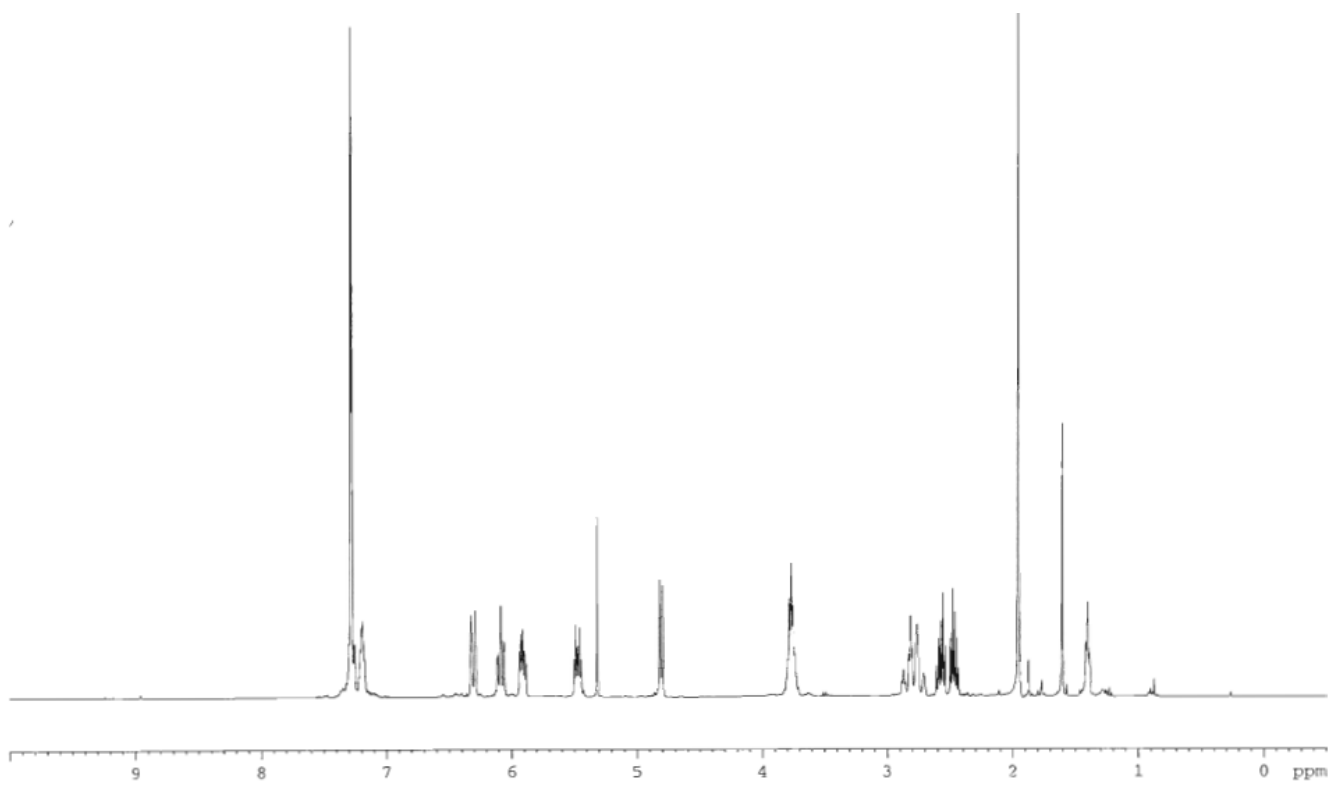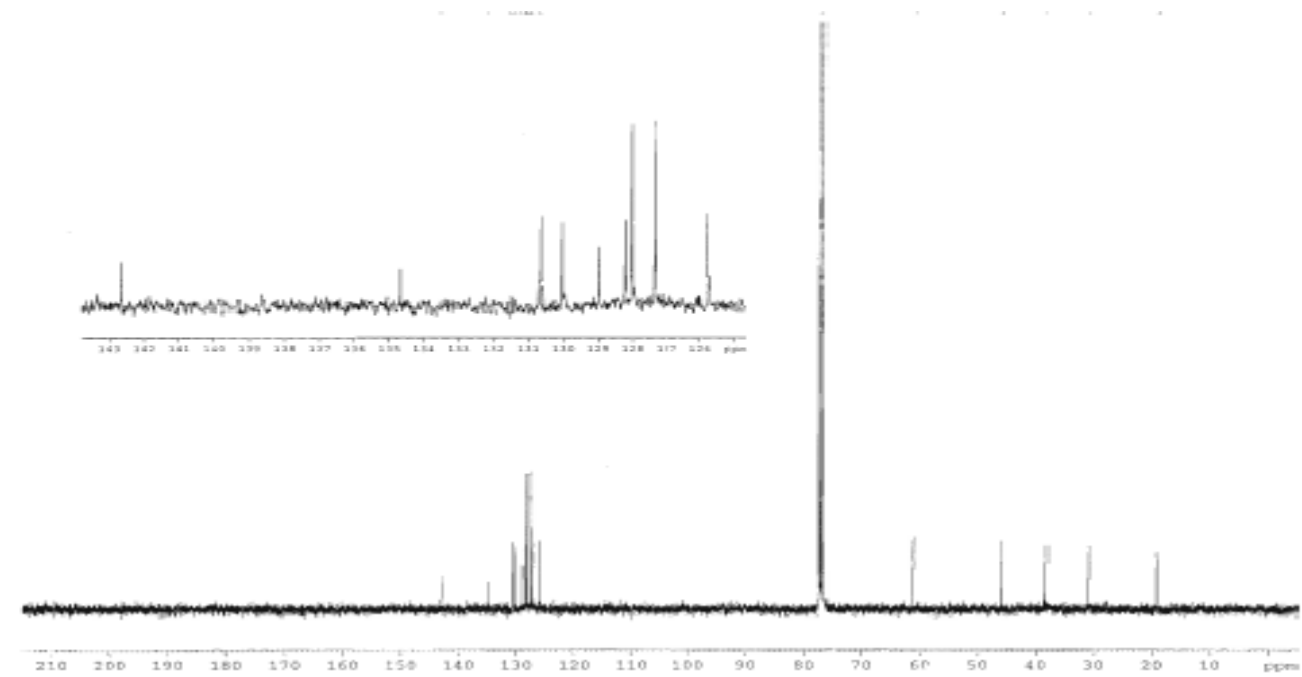

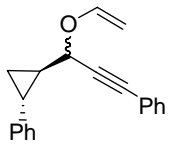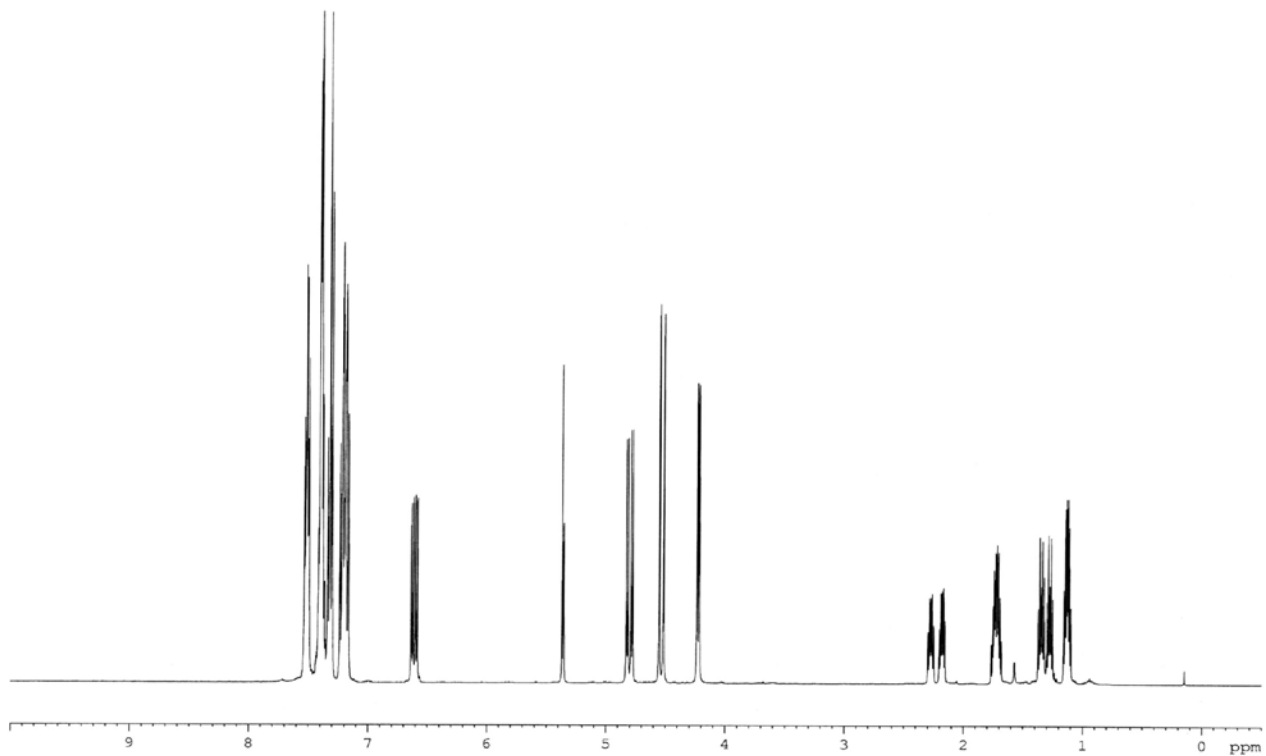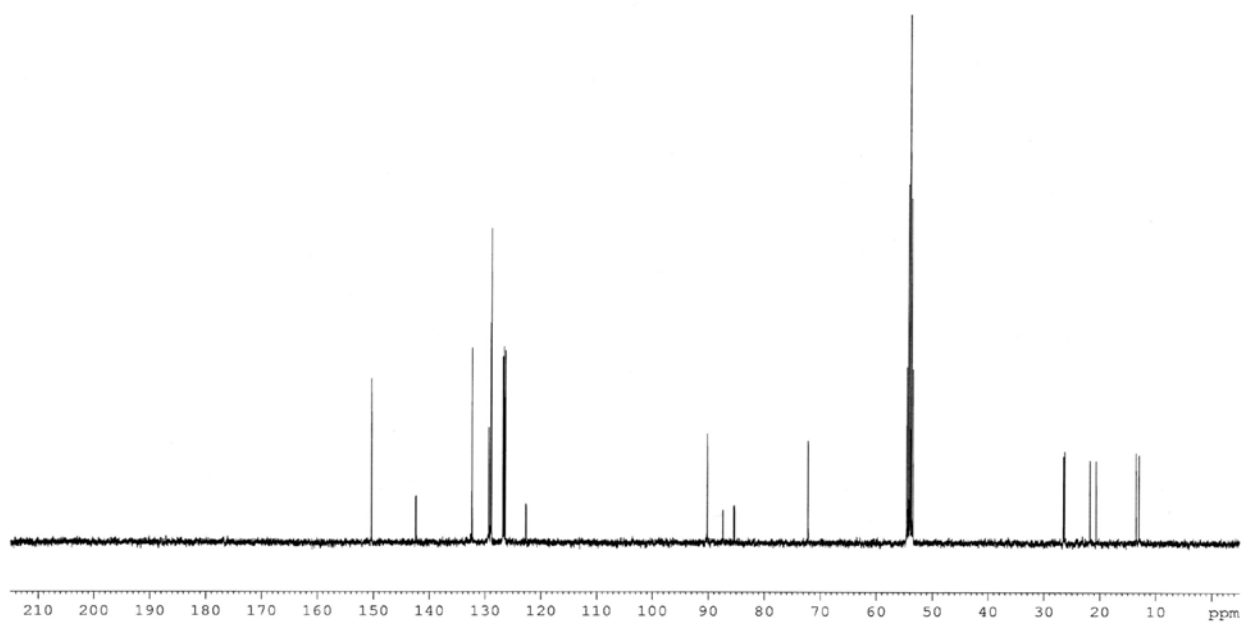



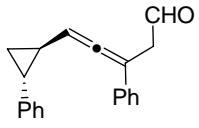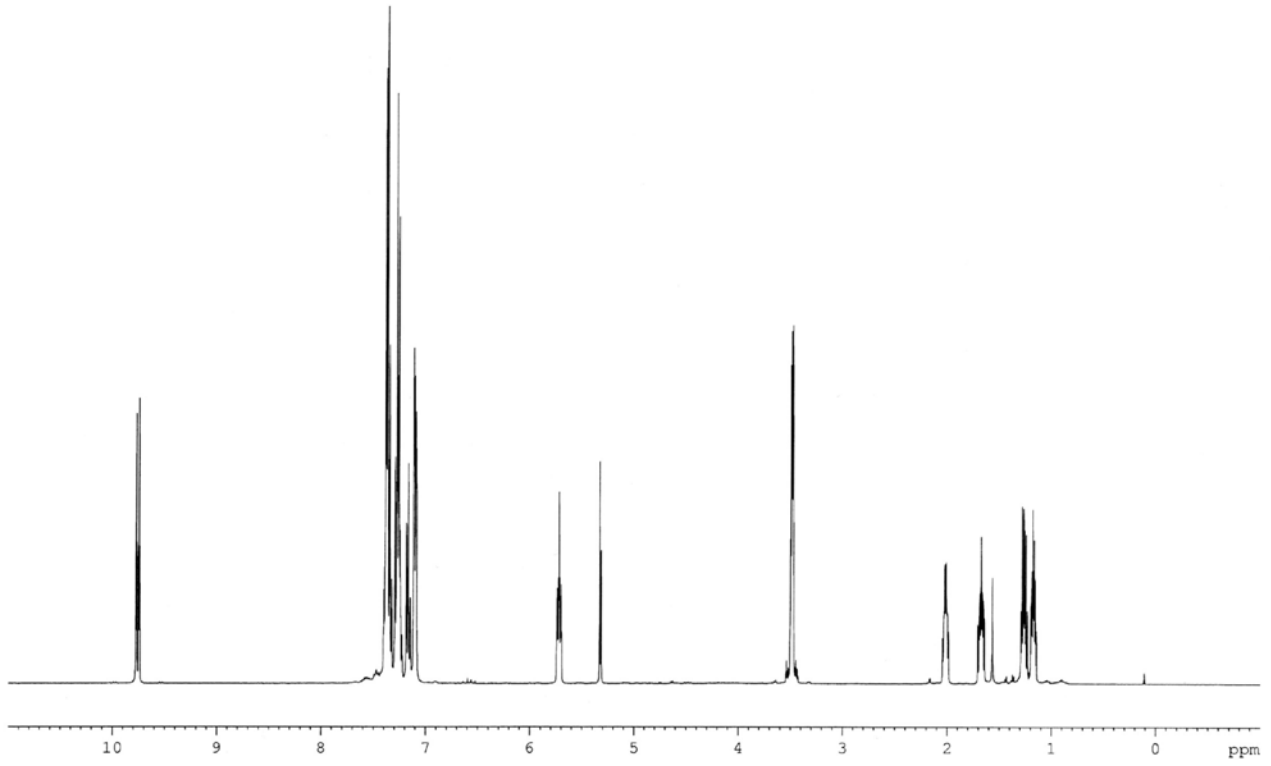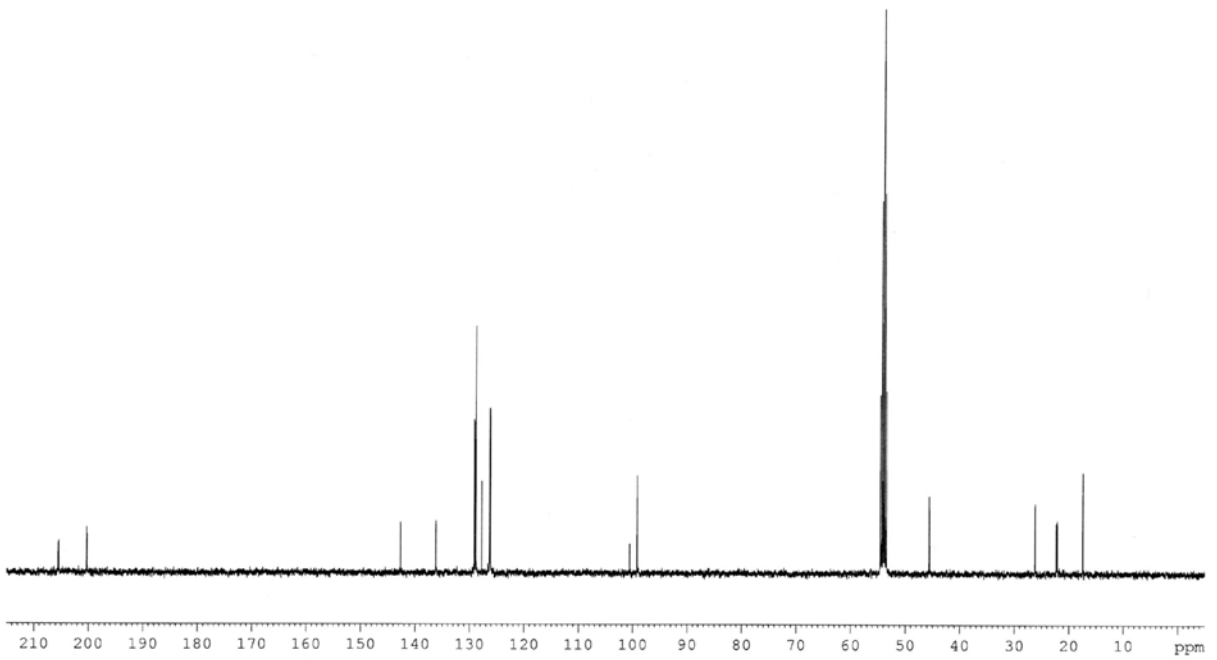

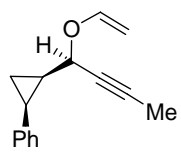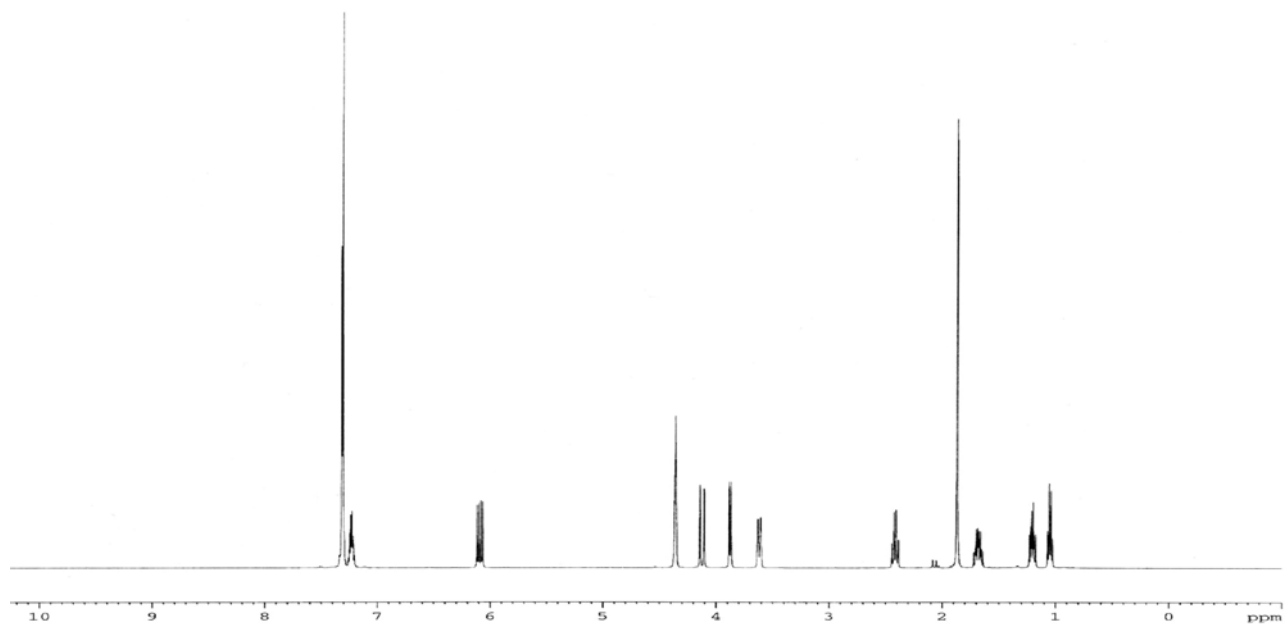

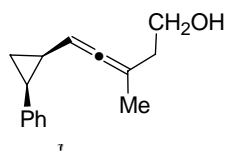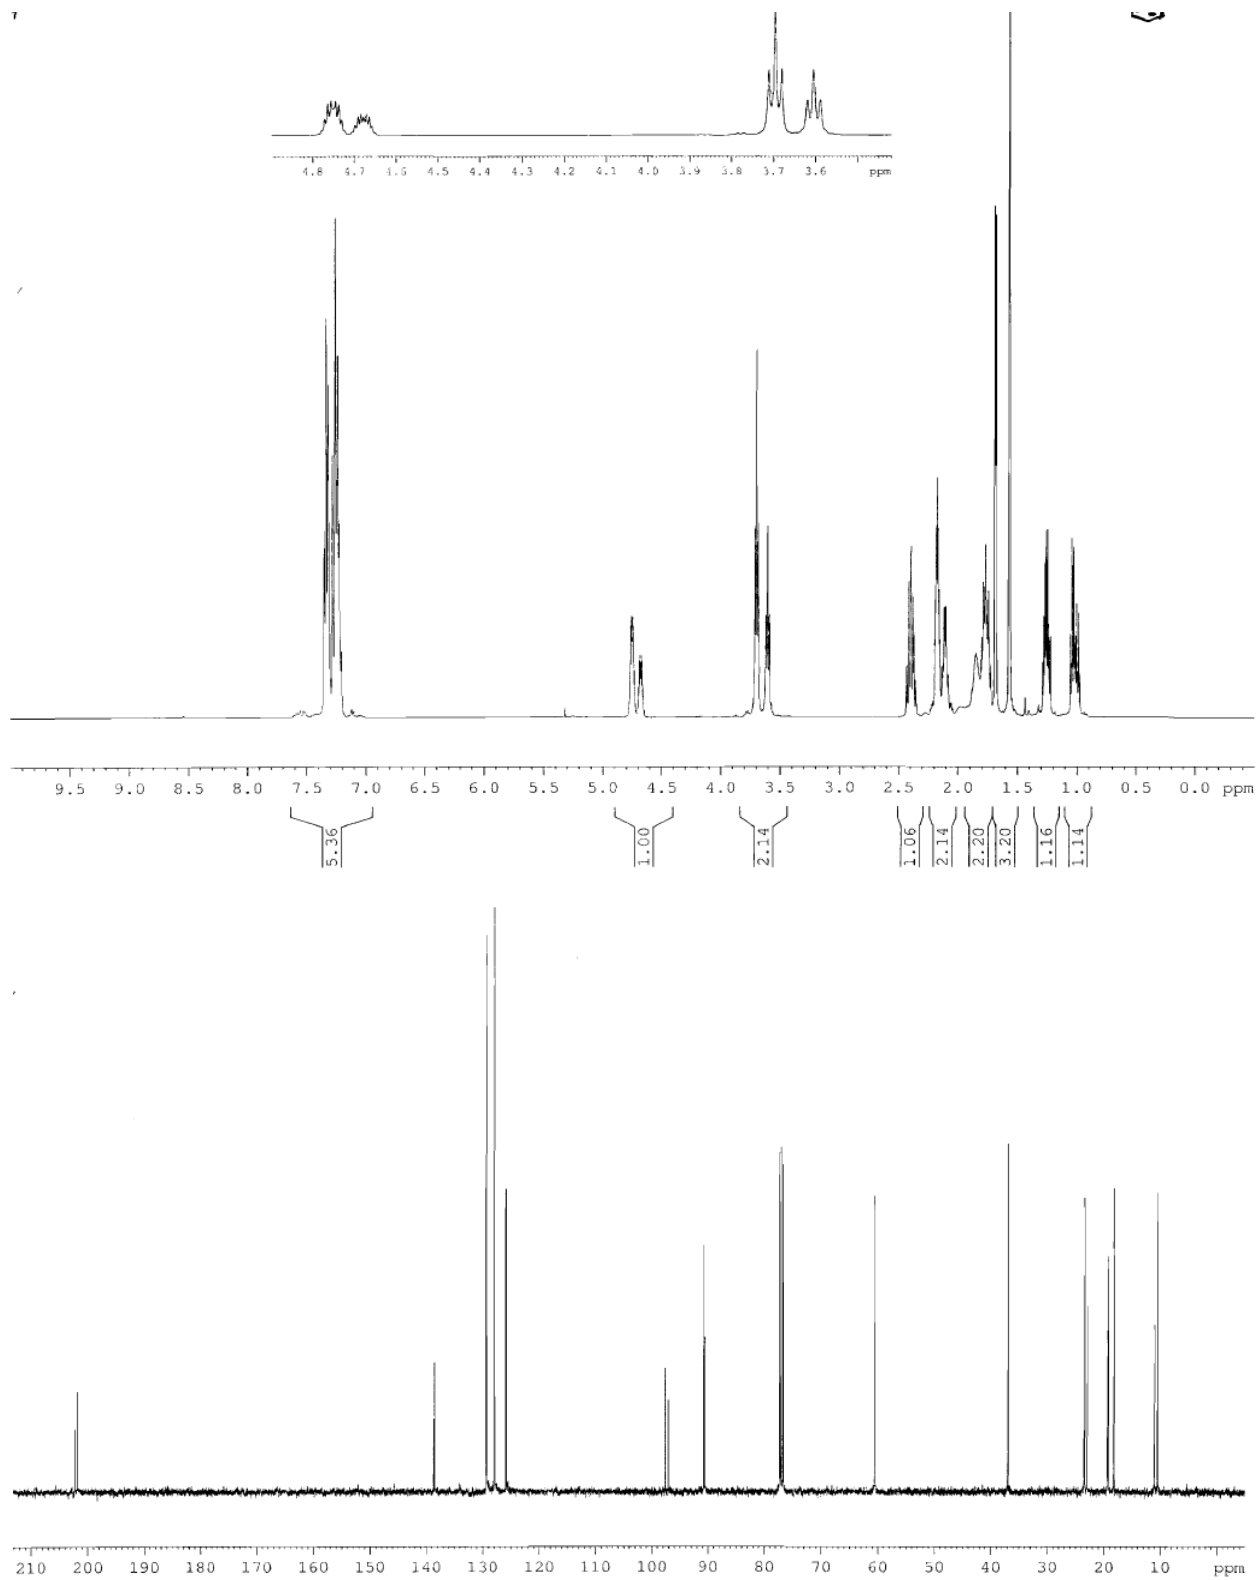

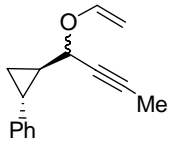

VQ-400 pa0711.071

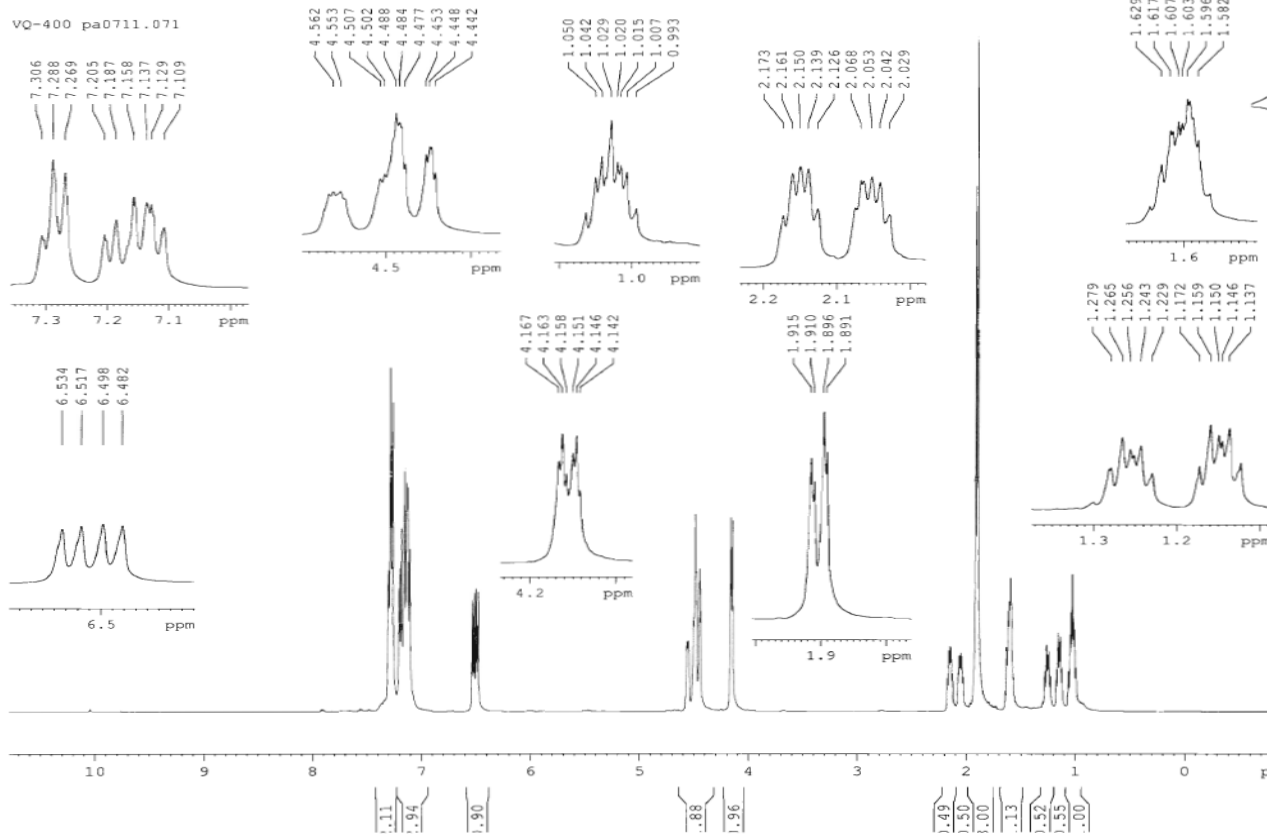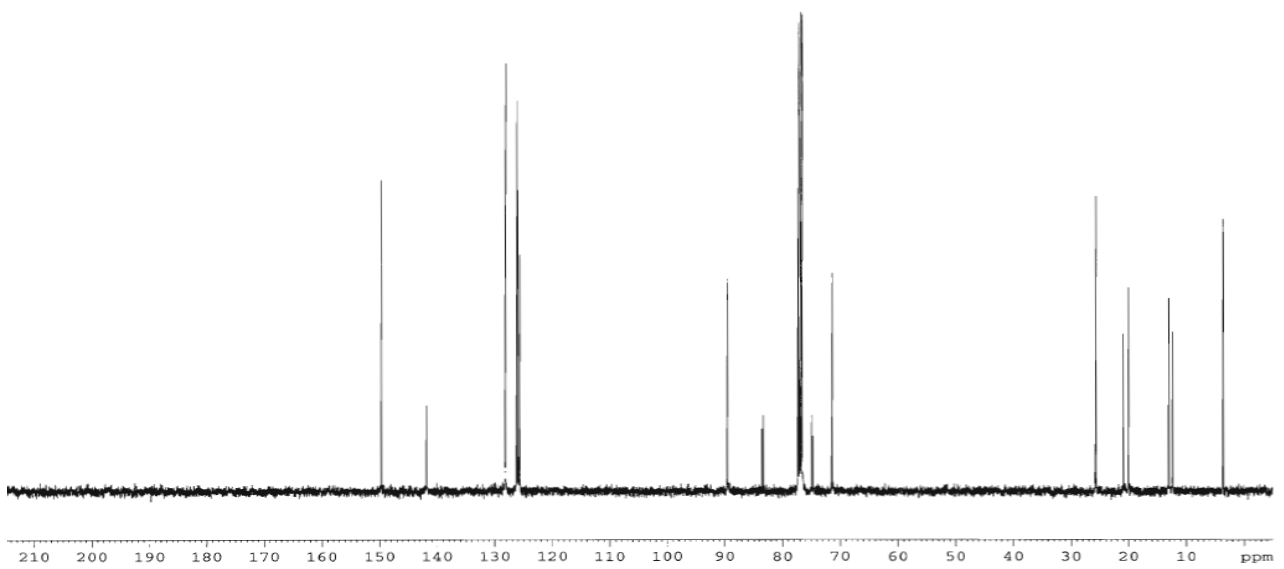

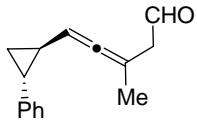

AVH-408 ps0711.0513

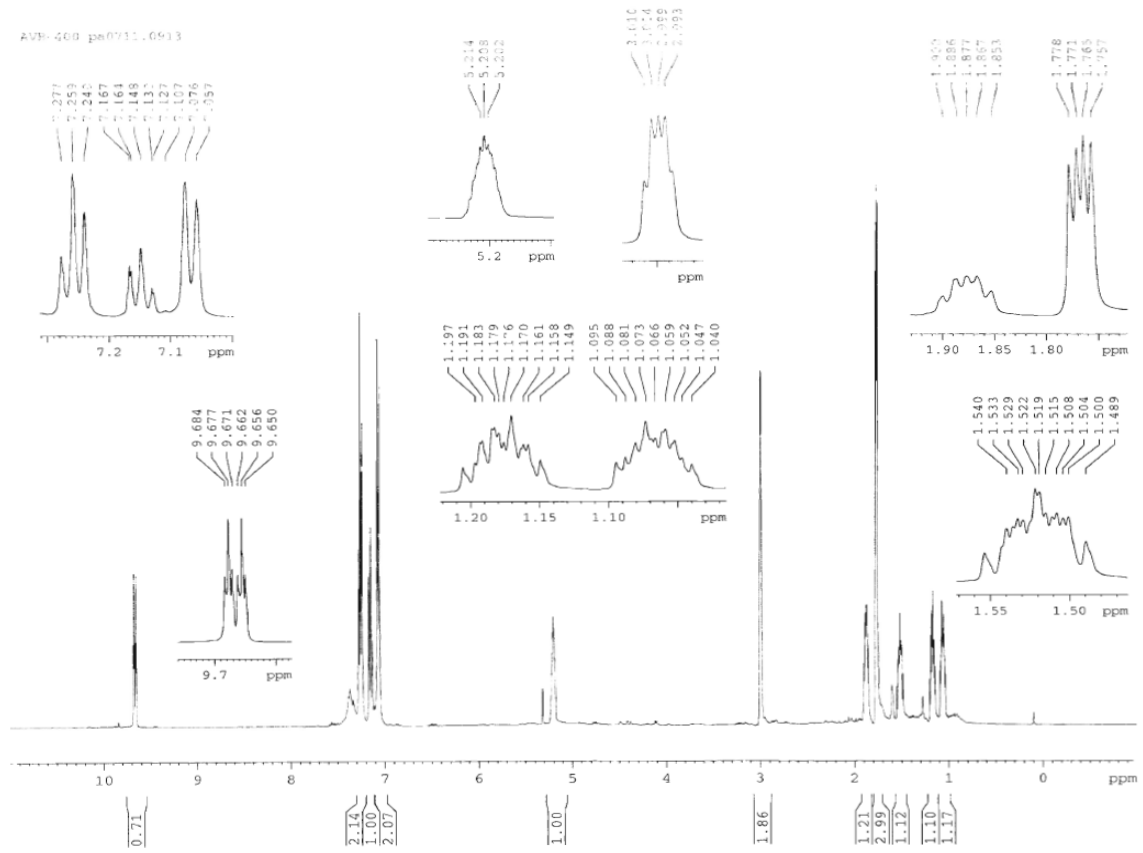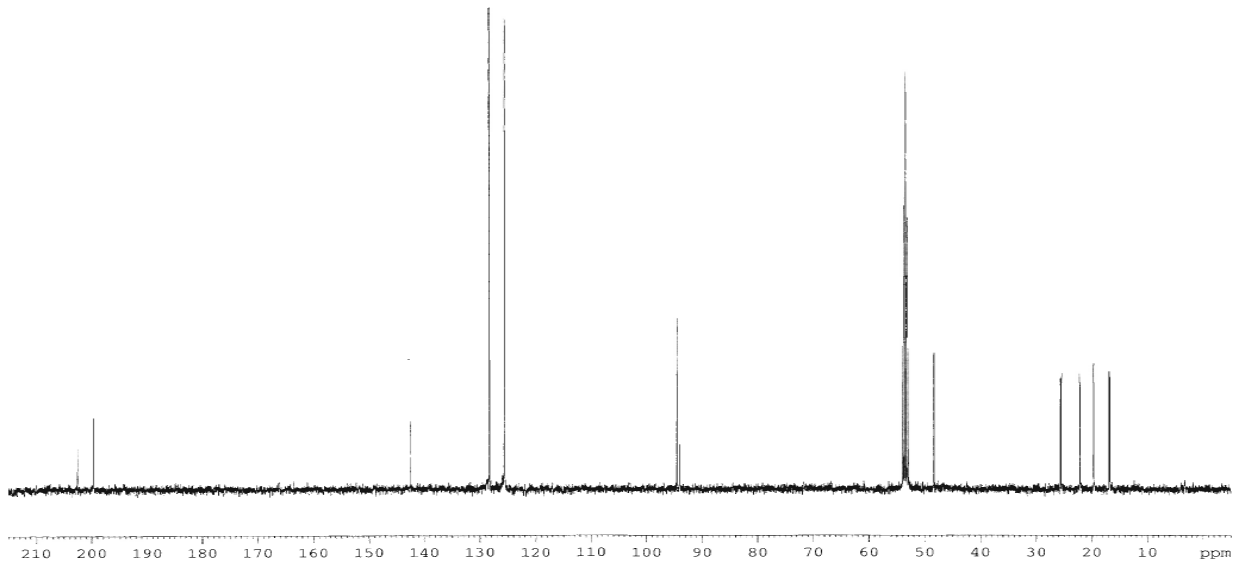

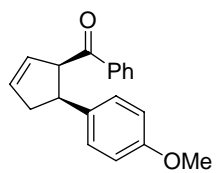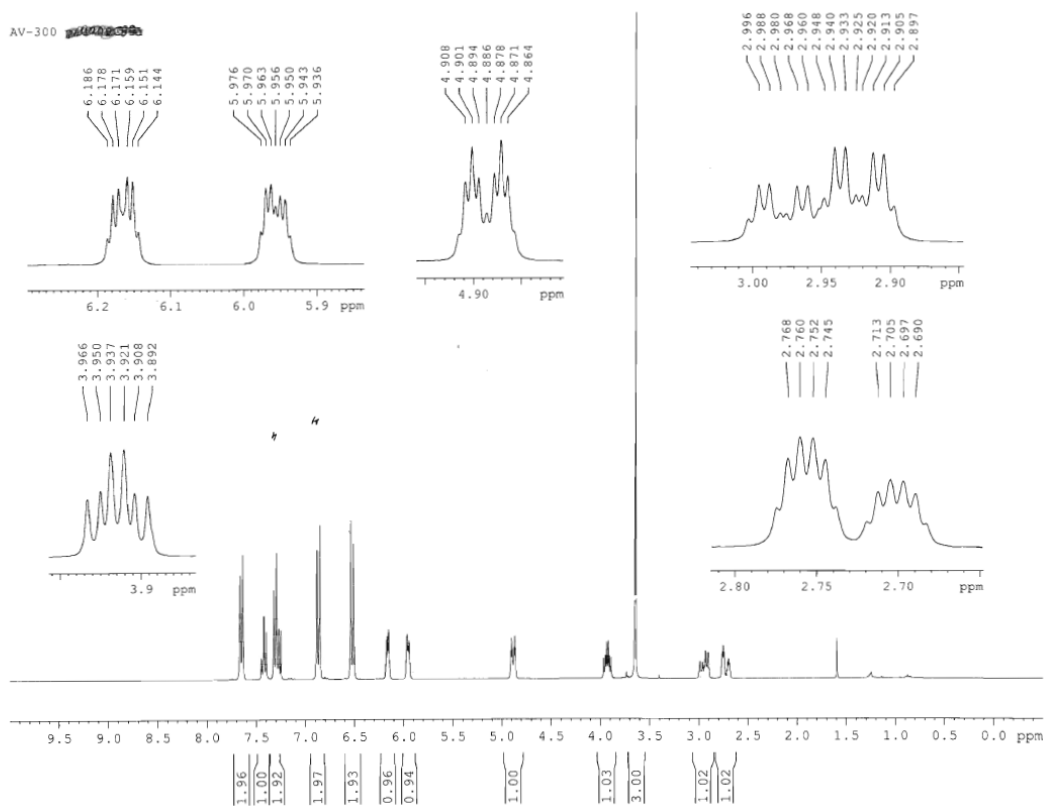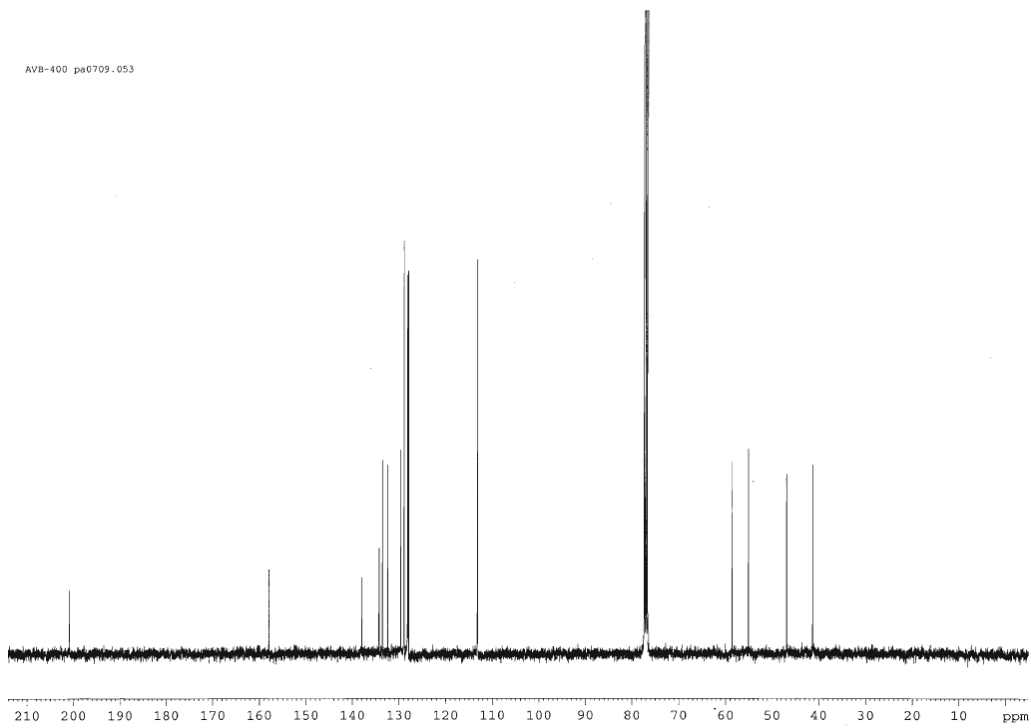

**NOESY correlations**

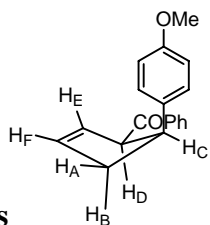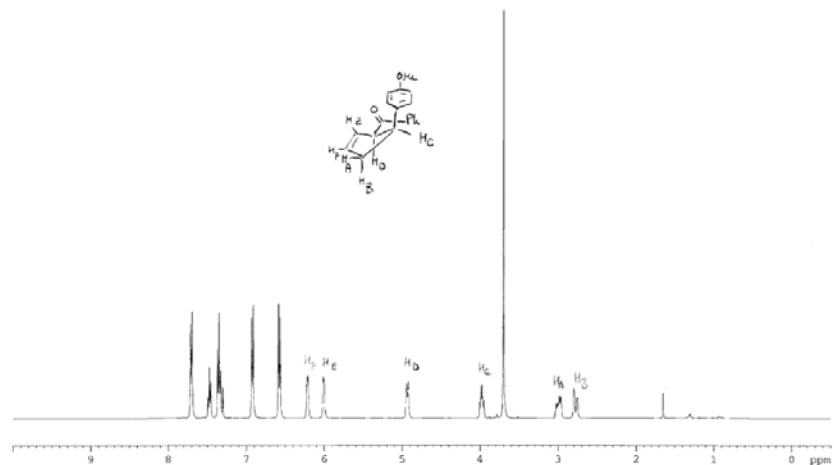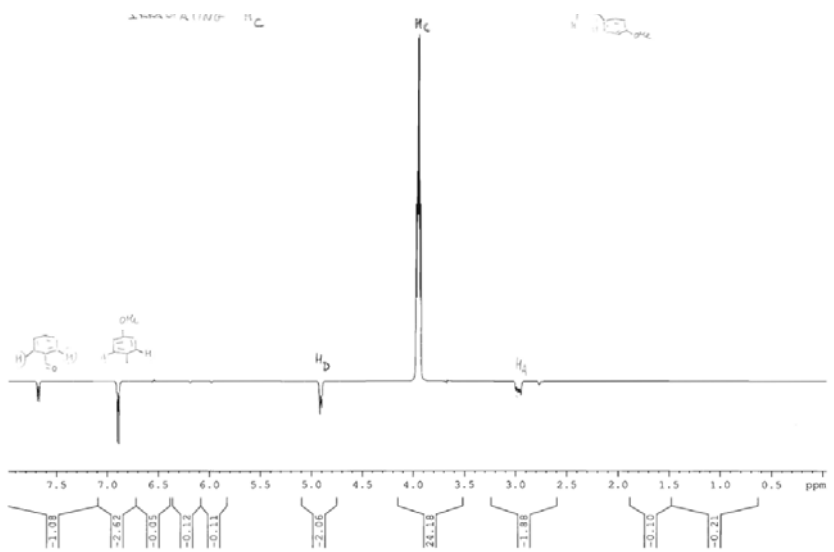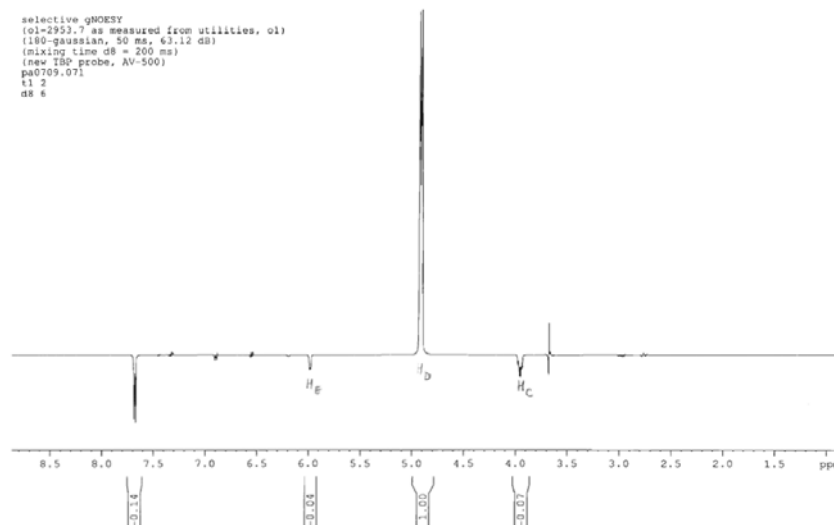

```
selective gNOESY
(ol)=2953.7 as measured from utilities, ol)
(100-gaussian, 50 ms, 63.12 dB)
(mixing time dB = 200 ms)
(new IBO probe, AV-500)
pa0709.071
t1 2
ds 6
```

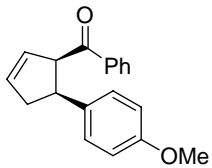

**Sample ID:** pa0709.081  
**Filename:**  
 C:\EZStart\Projects\Default\Data\Pablo\2007\pa0709.081AD9703IP.metBeach9-7-2  
 007 8-55-33 PM.dat **Method:**  
 C:\EZStart\Projects\Default\Method\AD\AD9703IP.met  
**Injection volume:** 5 uL

Description: {Data Description}

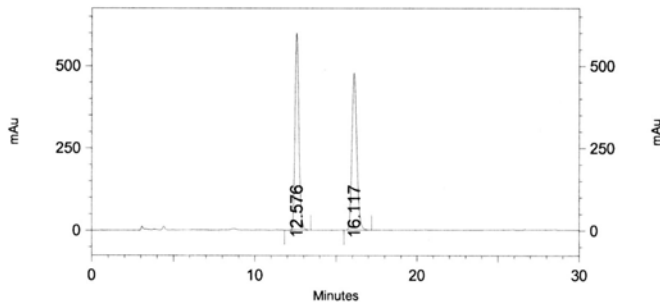

1: 230 nm, 4 nm Results

| Retention Time | Area    | Area Percent |
|----------------|---------|--------------|
| 12.576         | 9912233 | 49.915       |
| 16.117         | 9945909 | 50.085       |

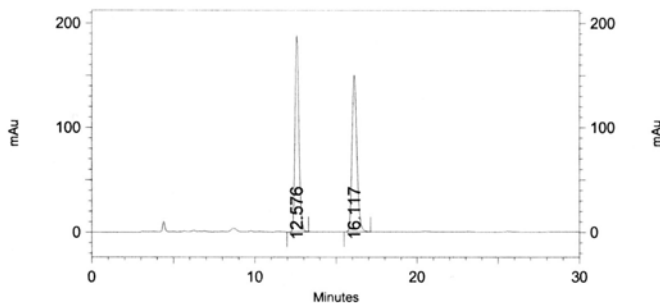

2: 254 nm, 4 nm Results

| Retention Time | Area    | Area Percent |
|----------------|---------|--------------|
| 12.576         | 3121421 | 49.990       |
| 16.117         | 3122714 | 50.010       |

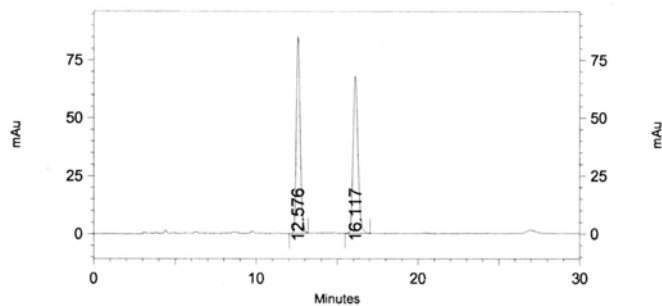

3: 280 nm, 4 nm Results

| Retention Time | Area    | Area Percent |
|----------------|---------|--------------|
| 12.576         | 1408537 | 49.978       |
| 16.117         | 1409757 | 50.022       |



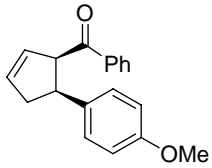

**Sample ID:** pa0709151  
**Filename:**  
 C:\EZStart\Projects\Default\Data\Pablo\2007\pa0709151AD9703IP40min.metBeach9  
 -14-2007 11-48-54 PM.dat **Method:**  
 C:\EZStart\Projects\Default\Method\Britt\AD9703IP40min.met  
**Injection volume:** 5 uL

Description: {Data Description}

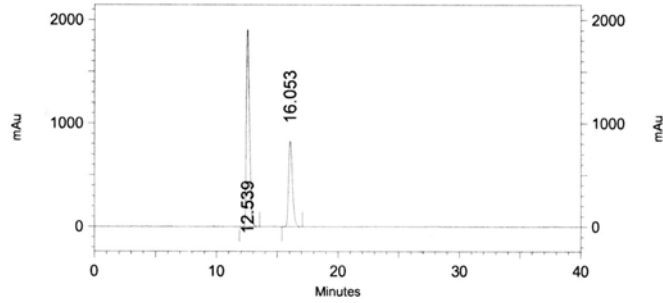

2: 254 nm, 4 nm Results

| Retention Time | Area     | Area Percent |
|----------------|----------|--------------|
| 12.539         | 35211258 | 66.063       |
| 16.053         | 18088312 | 33.937       |

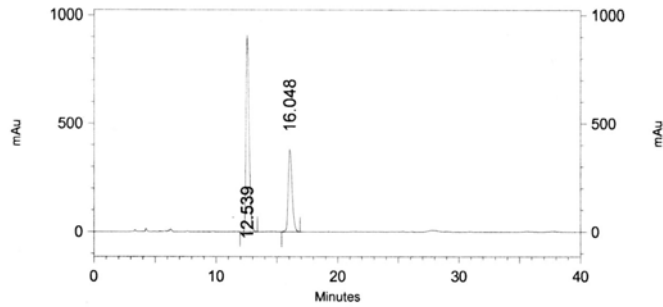

3: 280 nm, 4 nm Results

| Retention Time | Area     | Area Percent |
|----------------|----------|--------------|
| 12.539         | 16428854 | 66.250       |
| 16.048         | 8369252  | 33.750       |

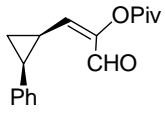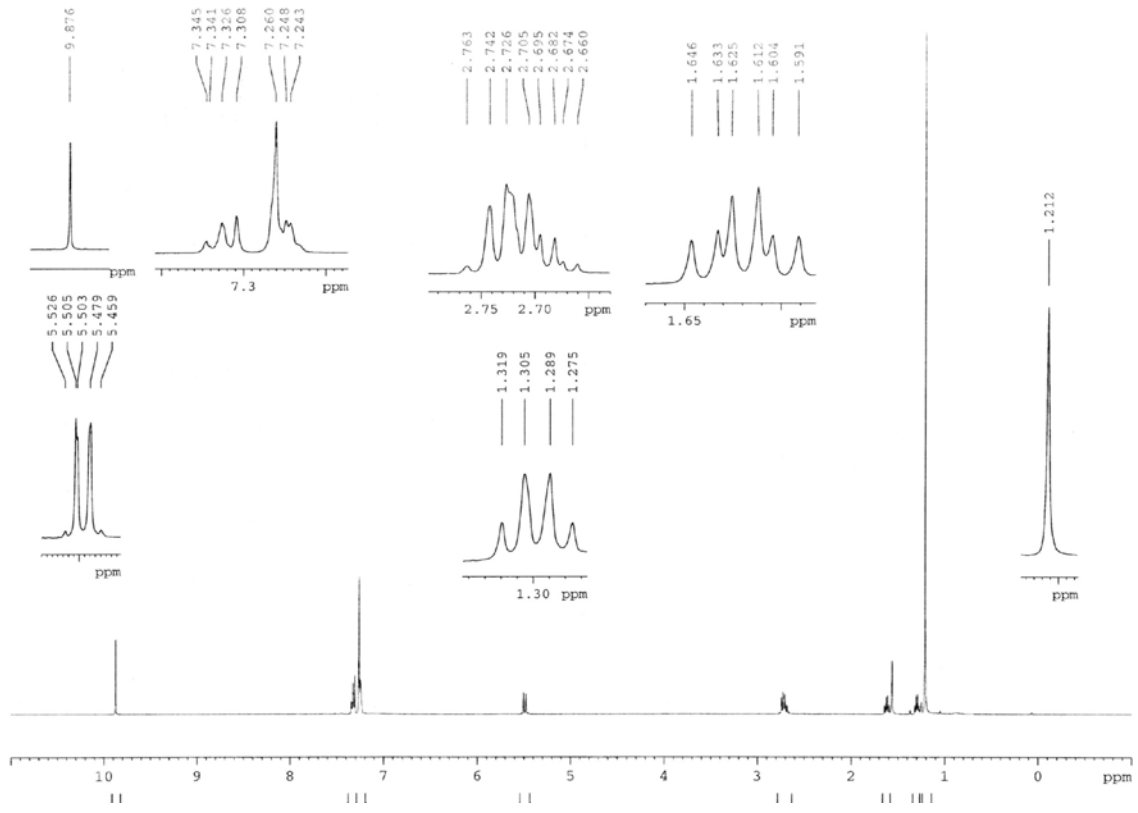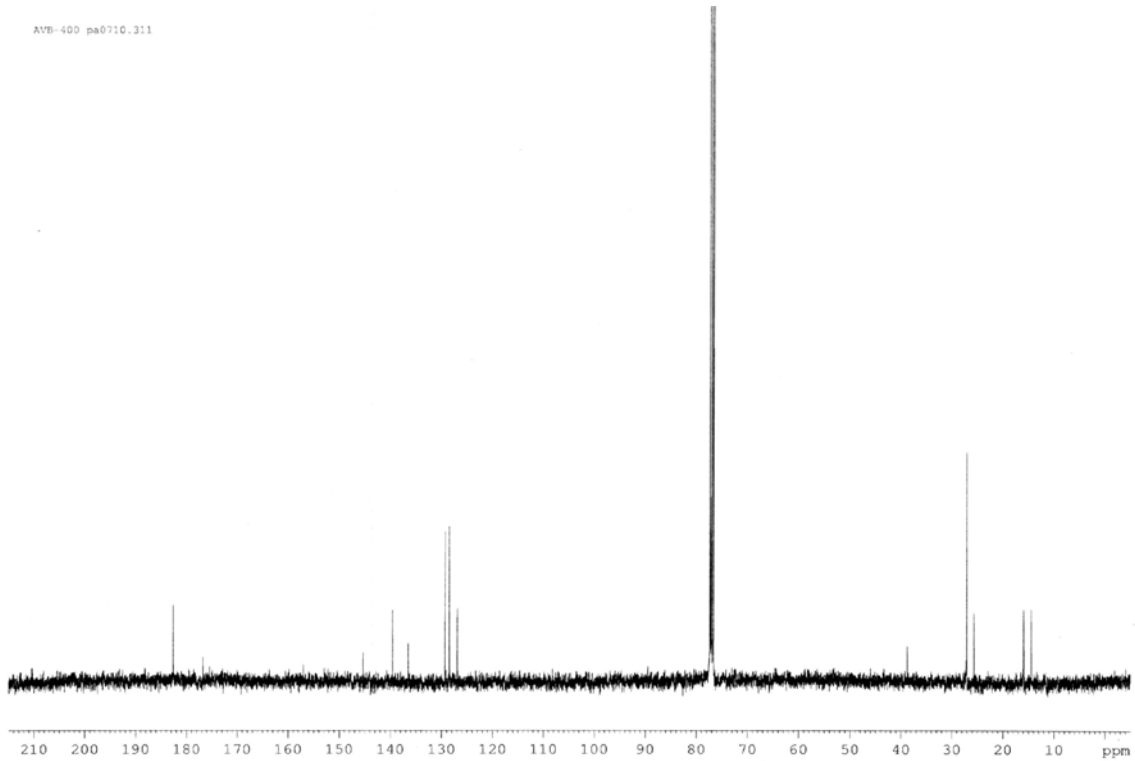

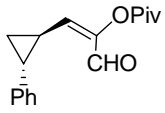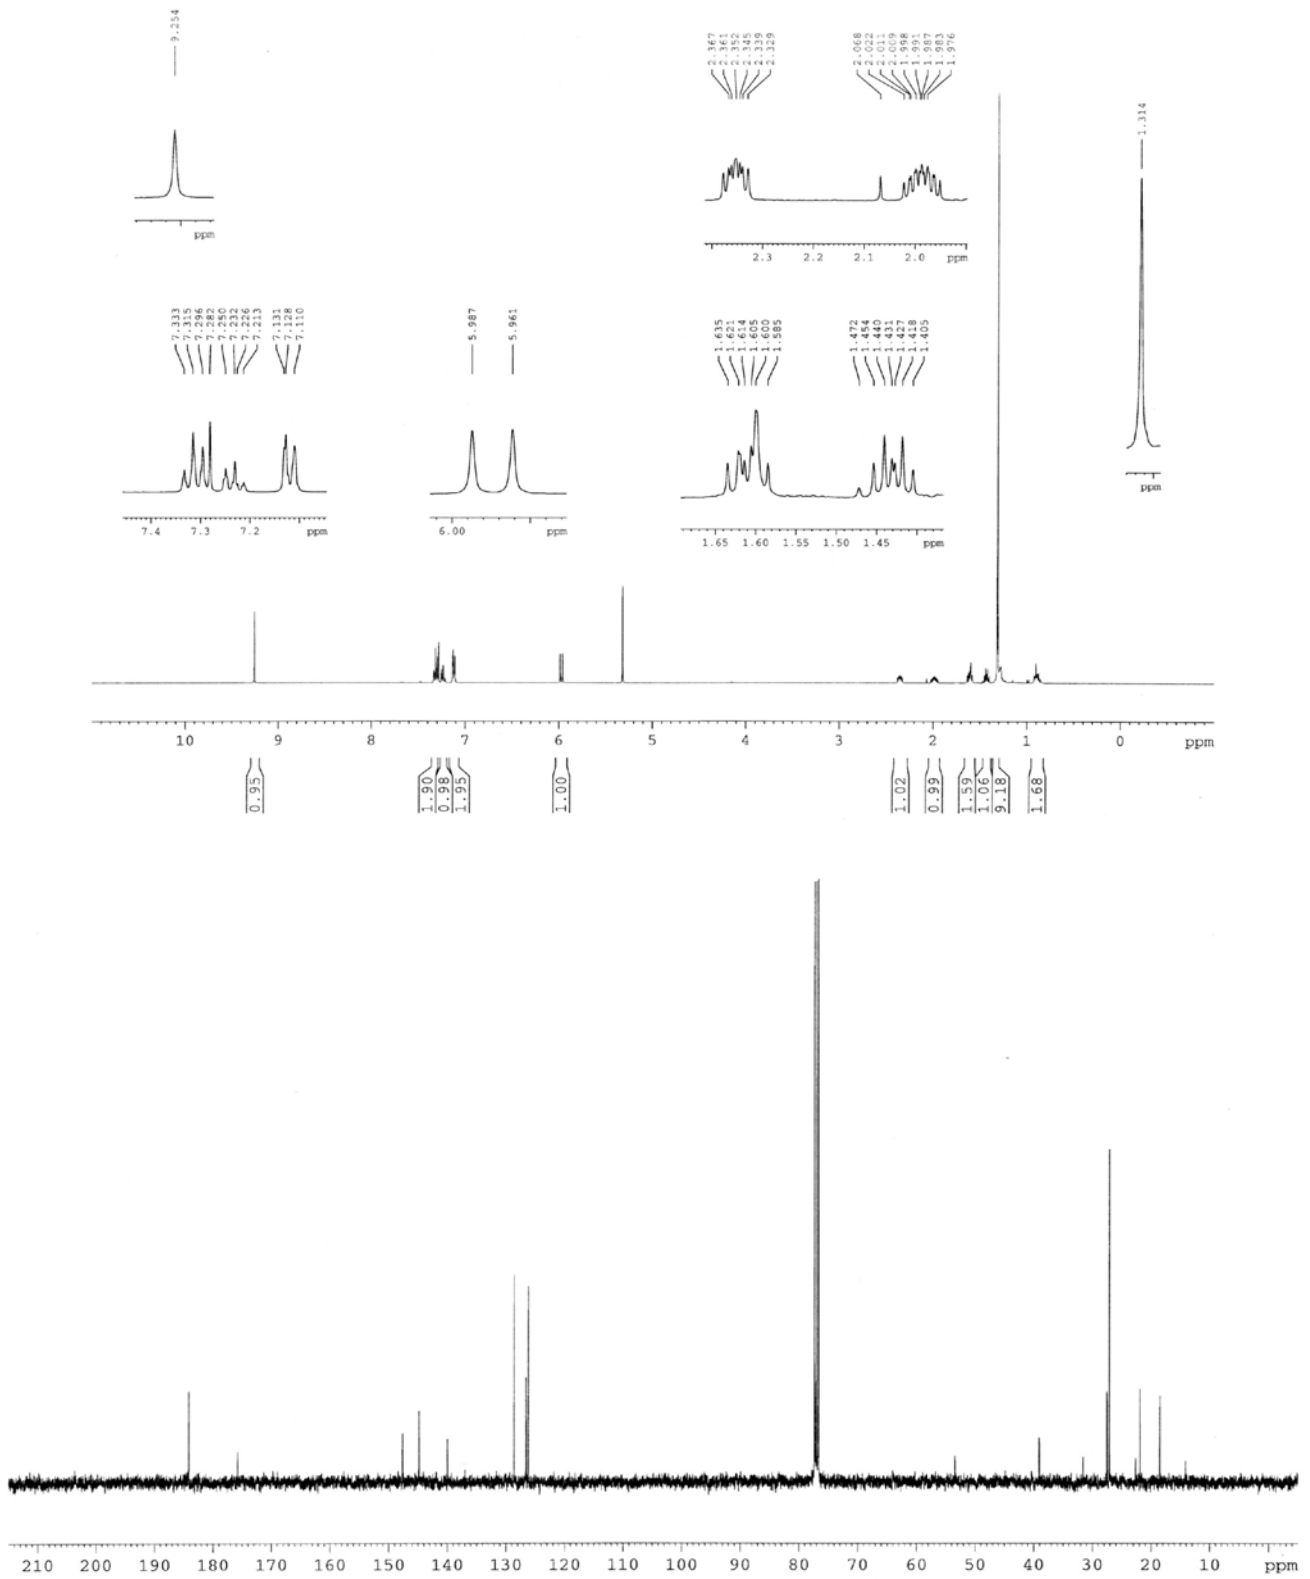

Supplement: NIHMS101866-supplement-3_si_003.pdf [file NIHMS101866-supplement-3_si_003.pdf]
