# Supplementary material
Source: PubMed Central journal article supplement (PMC2666792)
Supplement: NIHMS101866-supplement-1_si_001.pdf [file NIHMS101866-supplement-1_si_001.pdf]

## Supporting Information

# Mechanistic Studies on Au(I)-Catalyzed [3,3]-Sigmatropic Rearrangements using Cyclopropane Probes

*Pablo Mauleón, Jamin L. Krinsky, and F. Dean Toste\**

Department of Chemistry, University of California, Berkeley, California, 94720

fdtoste@berkeley.edu

### Table of contents

|                                                                                  |                 |
|----------------------------------------------------------------------------------|-----------------|
| <b>1. General information</b>                                                    | <b>S2</b>       |
| <b>2. Selected Analytical Data and Representative Experimental Procedures</b>    |                 |
| 2.1. Au(I)-catalyzed vinylcyclopropane-cyclopentene rearrangements               | S2-S13          |
| 2.2. Au(I)-catalyzed Claisen rearrangement of propargyl vinyl ethers             | S13-S17         |
| 2.3. Other experiments                                                           |                 |
| 2.3.1. <sup>18</sup> O labeling experiment                                       | S17-S19         |
| 2.3.2. Cleavage of the pivaloate group                                           | S19             |
| 2.3.3. <i>trans</i> -Disubstituted cyclopropyl propargyl esters and vinyl ethers | S19-S21         |
| 2.3.4. Ionization experiments and substitution at the ester moiety               | S21-S25         |
| 2.3.5. Cyclopentene formation: brief reaction scope                              | S25-S32         |
| 2.3.6. Terminal alkynes                                                          | S32-S33         |
| <b>3. DFT calculations</b>                                                       |                 |
| 3.1. On the pentannulation process                                               | S33-S35         |
| 3.2. <i>Cis/trans</i> cyclopropyl rearrangement                                  | S36-S37         |
| 3.3. Computational methods                                                       | S38             |
| 3.4. Energies and coordinates of computed structures                             | S39-S75         |
| <b>4. Selected spectral data</b>                                                 | <b>S76-S142</b> |

## 1. General Information

Unless otherwise noted, all reagents were obtained commercially and used without further purification. ACS grade nitromethane was obtained from Aldrich Chemical Company. Tetrahydrofuran (THF), diethyl ether and dichloromethane were dried according to a procedure by Bergman.<sup>1</sup> (Ph<sub>3</sub>P)AuCl was prepared according to literature procedures.<sup>2</sup> Extracts were dried over MgSO<sub>4</sub> or Na<sub>2</sub>SO<sub>4</sub> and solvents were removed *in vacuo* via a rotary evaporator at aspirator pressure. TLC analysis of reaction mixtures was performed on Merck silica gel 60 F254 TLC plates. Chromatography was carried out on ICN SiliTech 32-63 D 60 Å silica gel. <sup>1</sup>H and <sup>13</sup>C NMR spectra were recorded with Bruker AMX-300, AVQ-400 and AVB-400 spectrometers and referenced to CD<sub>2</sub>Cl<sub>2</sub>, CD<sub>3</sub>NO<sub>2</sub>, C<sub>6</sub>D<sub>6</sub> or CDCl<sub>3</sub>. Mass spectral and CHN data were obtained *via* the Micro-Mass/Analytical Facility operated by the College of Chemistry, University of California, Berkeley.

## 2. Selected Analytical Data and Representative Experimental Procedures

### 2.1. Au(I)-catalyzed vinylcyclopropane-cyclopentene rearrangements

*Propargylic esters bearing aryl substituents at the cyclopropyl unit.*

*Representative procedure: synthesis of 9.*

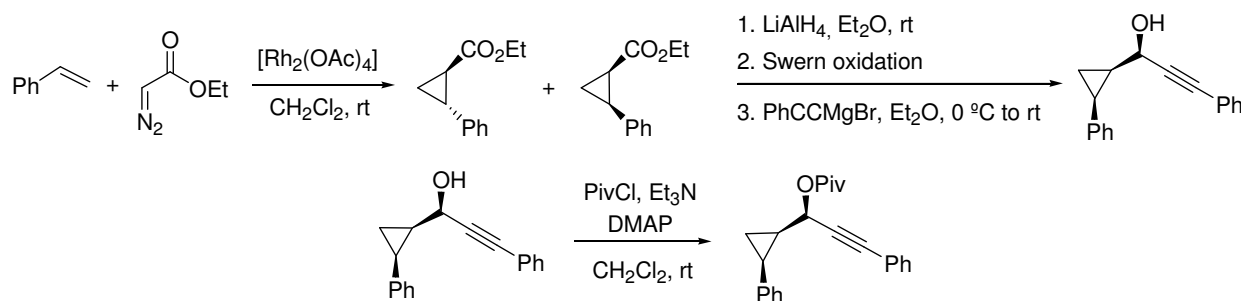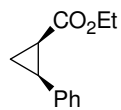

Compound previously reported.<sup>3</sup> To a suspension of styrene (3.0 g, 28.8 mmol) and Rh<sub>2</sub>(OAc)<sub>4</sub> (40 mg, 0.09 mmol) in CH<sub>2</sub>Cl<sub>2</sub> at room temperature was added ethyl diazoacetate (3.28 g, 28.8 mmol) via syringe pump and over the course of 12 hours. Once the addition was complete, the green mixture was stirred for another 12 hours, and then filtered through a short pad of silica gel to afford the desired cyclopropane derivative as a mixture of diastereoisomers (*trans*:*cis* = 60:40) in 88% yield. The mixture was separated by flash chromatography (typical eluent, pentane:Et<sub>2</sub>O). The desired *cis* ethyl 2-

<sup>1</sup> Alaimo, P.J.; Peters, D.W.; Arnold, J.; Bergman, R.G. *J. Chem. Ed.* **2001**, 78, 64.

<sup>2</sup> Bruce M. I.; Nicholson B. K.; Binshawkataly O.; Shapley Jr., Henly T. *Inorg. Syn.* **1989**, 26, 324.

<sup>3</sup> Doyle, M. P.; Loh, K. L.; DeVries, K. M.; Chinn, Mi. S. *Tetrahedron Lett.* **1987**, 28, 833.

phenylcyclopropane carboxylate was obtained as a clear oil (32% yield).  $^1\text{H}$  NMR (300 MHz,  $\text{CDCl}_3$ ):  $\delta$  7.27-7.19 (m, 5H), 3.85 (q,  $J = 14.1$  Hz, 2H), 2.55 (q,  $J = 7.8$  Hz, 1H), 2.10 (m, 1H), 1.70 (m, 1H), 1.45 (m, 1H), 1.0 (t,  $J = 7.0$  Hz, 3H).  $^{13}\text{C}$  NMR (75 MHz,  $\text{CDCl}_3$ ): 171.0, 136.5, 129.3, 127.9, 126.6, 60.2, 25.4, 21.8, 14.0, 11.1.

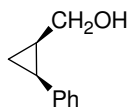

Compound previously reported.<sup>4</sup> A solution of *cis* ethyl 2-phenylcyclopropane carboxylate in  $\text{Et}_2\text{O}$  was added dropwise and under vigorous stirring to a 0 °C suspension of  $\text{LiAlH}_4$  in  $\text{Et}_2\text{O}$ . The solution was stirred at room temperature until TLC showed complete consumption of the starting material (ca. 2 hours). The reaction mixture was carefully quenched with sat. aq.  $\text{Na}_2\text{SO}_4$ , stirred at room temperature for 1 hour and filtered over a short pad of silica to remove the aluminum salts. Concentration afforded the desired alcohol in 94% yield, which was directly used in the next step without further purification.  $^1\text{H}$  NMR (300 MHz,  $\text{CDCl}_3$ ):  $\delta$  7.32-7.17 (m, 5H), 3.48-3.44 (m, 1H), 3.27 (dd,  $J = 8.4$  and 12.6 Hz, 1H), 2.32 (m, 1H), 1.51 (m, 1H), 1.29 (bs, 1H), 1.06 (dt,  $J = 5.4$  and 8.4 Hz, 1H), 0.89 (q,  $J = 5.6$  Hz, 1H).

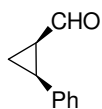

Compound previously reported.<sup>5</sup> To a solution of oxalyl chloride (0.63 mL, 7.42 mmol) in dry  $\text{CH}_2\text{Cl}_2$  (34 mL) was added DMSO (1.05 mL, 14.84 mmol) dropwise at -78 °C under nitrogen. The reaction mixture was stirred for 30 min, and the previously obtained alcohol (1.00 g, 6.75 mmol) was then added dropwise at -78 °C. After an additional 30 min of stirring at that temperature, dry  $\text{Et}_3\text{N}$  (4.75 mL, 33.75 mmol) was added dropwise and the reaction mixture was warmed to room temperature. Water (50 mL) was then added, and the biphasic mixture was transferred to a separatory funnel. The layers were separated, and the aqueous layer was extracted with DCM (3x10 mL). The combined organic layers were washed with brine (20 mL), dried with  $\text{MgSO}_4$ , filtered, and concentrated. The residue was purified by chromatography eluting with 5:1 hexanes/ $\text{AcOEt}$  to provide the desired aldehyde as a colorless oil (83% yield).  $^1\text{H}$  NMR (300 MHz,  $\text{CDCl}_3$ ):  $\delta$  8.66 (d,  $J = 6.7$  Hz, 1H), 7.34-7.21 (m, 5H), 2.83 (q,  $J = 8.2$  Hz, 1H), 2.14 (m, 1H), 1.89 (dt,  $J = 5.3$  and 7.2 Hz, 1H), 1.59 (dt,  $J = 5.6$  and 8.2 Hz, 1H).  $^{13}\text{C}$  NMR (75 MHz,  $\text{CDCl}_3$ ): 201.3, 135.7, 129.1, 128.5, 127.1, 29.6, 26.3, 11.5.

<sup>4</sup> Baldwin, J. E.; Patapoff, T. W.; Barden, T. C. *J. Am. Chem. Soc.* **1984**, *106*, 1421.

<sup>5</sup> Aggarwal, V. K.; Guang Yu Fang, G. Y.; Graham Meek, G. *Org. Lett.* **2003**, *5*, 4417.

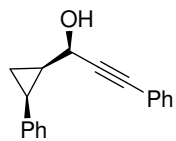

To a solution of the previously obtained phenyl cyclopropyl aldehyde (439 mg, 3.00 mmol) in ether (15 mL) was added phenylethynyl magnesium bromide (3.1 mL, 3.10 mmol) dropwise at 0 °C. The reaction mixture was then warmed to room temperature and stirred for 2 hours. Water (10 mL) was then added to the resulting mixture, and the biphasic mixture was transferred to a separatory funnel. The layers were separated, and the aqueous layer was extracted with AcOEt (3x5 mL). The combined organic layers were washed with brine (15 mL), dried with MgSO<sub>4</sub>, filtered, and concentrated to obtain the desired alcohol as a mixture of diastereoisomers about the propargylic position (87:13). The residue was purified by chromatography eluting with 10:1 hexanes/AcOEt to provide the desired product as a white solid (78% yield). <sup>1</sup>H NMR (300 MHz, C<sub>6</sub>D<sub>6</sub>): δ 7.47-7.42 (m, 2H), 7.15-7.09 (m, 4H), 7.06-7.02 (m, 1H), 7.99-6.93 (m, 3H), 3.76 (d, *J* = 9.4 Hz, 1H), 2.02 (m, 1H), 1.59 (quint, *J* = 8.1 Hz, 1H), 1.37 (bs, 1H), 0.77 (m, 2H). <sup>13</sup>C NMR (75 MHz, C<sub>6</sub>D<sub>6</sub>): δ 137.9, 132.0, 129.7, 128.5, 128.4, 128.3, 126.6, 123.6, 91.2, 84.1, 63.0, 26.1, 22.2, 7.6. HRMS (FAB) calc. for [C<sub>18</sub>H<sub>16</sub>O]<sup>+</sup> ([M]<sup>+</sup>) 248.1201, found 248.1204.

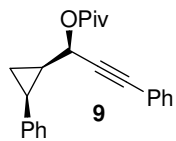

**9.** To a solution of the previously obtained alcohol (496 mg, 2.0 mmol) in dry CH<sub>2</sub>Cl<sub>2</sub> (10 mL) were added Et<sub>3</sub>N (0.42 mL, 3.0 mmol) and DMAP (25 mg, 0.2 mmol) at room temperature. The solution was then cooled at 0 °C, and pivaloyl chloride (0.30 mL, 2.4 mmol) was added dropwise. The reaction mixture was then stirred overnight at room temperature. A saturated solution of NaHCO<sub>3</sub> (10 mL) was then added to the resulting mixture, and the biphasic mixture was transferred to a separatory funnel. The layers were separated, and the aqueous layer was extracted with DCM (3x5 mL). The combined organic layers were washed with brine (20 mL), dried with Na<sub>2</sub>SO<sub>4</sub>, filtered and concentrated. The residue was purified by chromatography eluting with AcOEt/hexanes (1:25) to provide a colorless oil (1.07 g, 97% yield). <sup>1</sup>H NMR (400 MHz, CDCl<sub>3</sub>) δ 7.43-7.41 (m, 2H), 7.30-7.17 (m, 8H), 4.63 (d, *J* = 10.4 Hz), 2.40 (q, *J* = 7.6 Hz, 1H), 1.89-1.81 (m, 1H), 1.27-1.21 (m, 1H), 1.16-1.13 (m, 1H), 1.10 (s, 9H). <sup>13</sup>C NMR (100 MHz, CDCl<sub>3</sub>) δ 176.3, 136.7, 131.9, 128.9, 128.3, 128.1, 126.5, 122.6, 87.0, 84.1, 64.4, 38.4, 27.0, 23.0, 22.0, 7.7. HRMS (FAB) calc. for [C<sub>23</sub>H<sub>24</sub>O<sub>2</sub>]<sup>+</sup> ([M]<sup>+</sup>) 332.1776, found 332.1779.

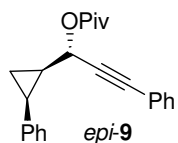

**epi-9.**  $^1\text{H}$  NMR (400 MHz,  $\text{CDCl}_3$ )  $\delta$  7.43-7.41 (m, 2H), 7.36-7.33 (m, 7H), 7.30-7.26 (m, 1H), 4.92 (d,  $J = 10.0$  Hz), 2.47 (q,  $J = 8.4$  Hz, 1H), 1.87-1.79 (m, 1H), 1.29 (s, 9H), 1.25-1.21 (m, 1H), 1.19-1.13 (m, 1H).  $^{13}\text{C}$  NMR (100 MHz,  $\text{CDCl}_3$ )  $\delta$  177.5, 137.0, 131.7, 129.4, 128.3, 128.1, 126.5, 122.6, 86.5, 84.7, 65.6, 38.8, 27.0, 23.5, 21.1, 8.8. HRMS (FAB) calc. for  $[\text{C}_{23}\text{H}_{24}\text{O}_2]^+$  ( $[\text{M}]^+$ ) 332.1776, found 332.1778.

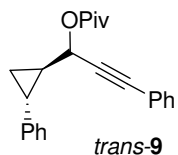

**trans-9.** Obtained as a 1:1 mixture of diastereomers about the propargylic position.  $^1\text{H}$  NMR (400 MHz,  $\text{CDCl}_3$ )  $\delta$  7.51-7.42 (m, 4H), 7.37-7.28 (m, 10H), 7.23-7.14 (m, 6H), 5.74 (d,  $J = 6.4$  Hz, 1H), 5.64 (d,  $J = 6.8$  Hz, 1H), 2.26 (quint,  $J = 4.4$  Hz, 1H), 2.18 (quint,  $J = 5.2$  Hz, 1H), 1.74-1.66 (m, 2H), 1.29 (s, 9H), 1.28 (s, 9H), 1.34-1.24 (m, 2H), 1.15-1.09 (m, 2H).  $^{13}\text{C}$  NMR (100 MHz,  $\text{CDCl}_3$ )  $\delta$  177.5, 141.6, 141.5, 131.9, 131.8, 128.6, 128.3, 128.2, 128.1, 126.5, 126.2, 125.9, 122.2, 122.1, 85.6, 85.4, 84.8, 84.5, 66.6, 66.5, 38.8, 27.1, 25.8, 25.1, 21.6, 20.3, 12.9, 12.3. HRMS (FAB) calc. for  $[\text{C}_{23}\text{H}_{24}\text{O}_2]^+$  ( $[\text{M}]^+$ ) 332.1776, found 332.1779.

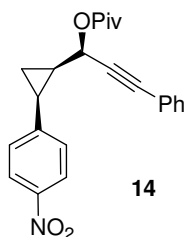

**14.**  $^1\text{H}$  NMR (400 MHz,  $\text{CD}_2\text{Cl}_2$ )  $\delta$  8.15 (d,  $J = 8.8$  Hz, 2H), 7.45-7.43 (m, 4H), 7.40-7.35 (m, 3H), 4.71 (d,  $J = 10.0$  Hz, 1 Hz), 2.52 (q,  $J = 8.0$  Hz, 1 Hz), 2.03 (m, 1H), 1.41 (m, 1H), 1.29 (m, 1H), 1.09 (s, 9H).  $^{13}\text{C}$  NMR (100 MHz,  $\text{CD}_2\text{Cl}_2$ )  $\delta$  176.2, 146.2, 145.5, 131.7, 129.7, 128.7, 128.3, 123.2, 122.2, 86.3, 84.5, 63.8, 38.3, 26.7, 24.0, 22.0, 8.6. HRMS (FAB) calc. for  $[\text{C}_{23}\text{H}_{23}\text{NO}_4]^+$  ( $[\text{M}]^+$ ) 367.1627, found 367.1620.

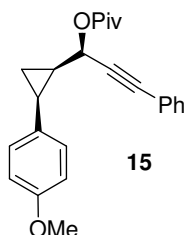

**15.**  $^1\text{H}$  NMR (400 MHz,  $\text{CDCl}_3$ )  $\delta$  7.45-7.43 (m, 2H), 7.32-7.29 (m, 3H), 7.16 (d,  $J = 8.4$  Hz, 2H), 6.81 (d,  $J = 8.4$  Hz, 2H), 4.60 (d,  $J = 10.0$  Hz, 1H), 3.80 (s, 3H), 2.36 (q,  $J = 8.0$  Hz, 1H),

1.81 (m, 1H), 1.22 (m, 1H), 1.16 (s, 9H), 1.06 (q,  $J = 5.6$  Hz, 1H).  $^{13}\text{C}$  NMR (100 MHz,  $\text{CDCl}_3$ )  $\delta$  176.3, 158.2, 131.8, 130.0, 128.7, 128.3, 128.1, 122.6, 113.6, 87.1, 84.0, 64.6, 55.2, 38.4, 27.0, 22.6, 21.3, 7.7. HRMS (FAB) calc. for  $[\text{C}_{24}\text{H}_{26}\text{O}_3]^+$  ( $[\text{M}]^+$ ) 362.1882, found 362.1888.

*Propargylic esters bearing styrene at the cyclopropyl unit.*

*Representative procedure: synthesis of 28.*

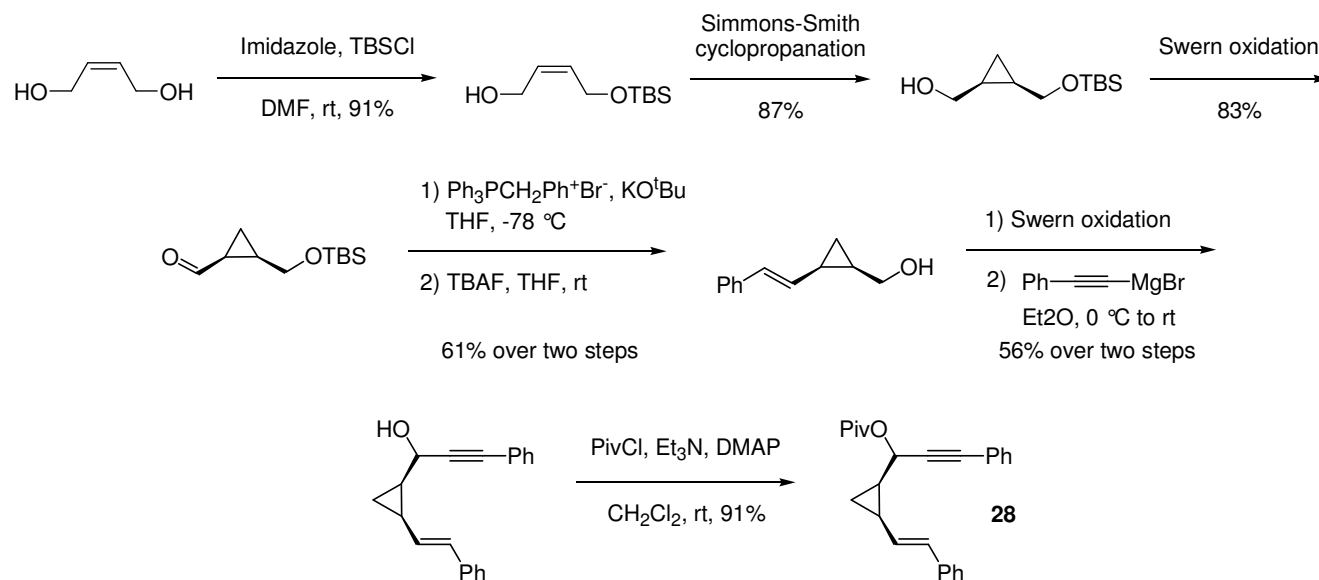

$\text{HO-CH}_2\text{-CH=CH-CH}_2\text{-OTBS}$  To a stirred solution of imidazole (10.2 g, 150 mmol) in dry DMF (50 mL) under a nitrogen atmosphere was added *cis*-2-butene-1,4-diol (8.2 mL, 100 mmol) dropwise. The resulting mixture was stirred at room temperature for 45 min, and then *tert*-butyldimethylsilyl chloride (16.6 g, 110 mmol) was added in one portion. The reaction mixture was stirred an additional 30 min, diluted with  $\text{H}_2\text{O}$  (100 mL), and the biphasic mixture was transferred to a separatory funnel. The layers were separated, and the aqueous layer was extracted with ether (3x40 mL). The combined organic layers were washed with water (100 mL), brine (100 mL), dried with  $\text{MgSO}_4$ , filtered, and concentrated to yield a yellow residue. The residue was purified by chromatography eluting with 3:1 hexanes/EtOAc to provide a colorless oil (91% yield).  $^1\text{H}$  NMR (300 MHz,  $\text{CDCl}_3$ )  $\delta$  5.74-5.54 (m, 2H), 4.25-4.17 (dd,  $J = 6.0, 21.0$  Hz, 4H), 2.44 (bs, 1H), 0.89 (s, 9H), 0.07 (s, 6H).  $^{13}\text{C}$  NMR (75 MHz,  $\text{CDCl}_3$ )  $\delta$  131.2, 130.0, 59.5, 58.7, 25.8, 25.6, 18.3, -3.6, -5.3. HRMS (FAB) calc. for  $[\text{C}_{10}\text{H}_{22}\text{O}_2\text{Si}]^+$  ( $[\text{M}]^+$ ) 202.1389, found 202.1394.

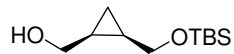

To a solution of diiodomethane (3.18 mL, 39.6 mmol) in dry  $\text{CH}_2\text{Cl}_2$  (100 mL) was added diethylzinc (20.0 mL, 20.0 mmol) under nitrogen at 0 °C. The resulting white suspension was stirred for 15 min at 0 °C, and then cooled to -78 °C. The previously prepared allylic alcohol (2.00 g, 9.88 mmol) was added, and the reaction mixture was stirred at -78 °C for 15 min. Approximately four drops of  $\text{TiCl}_4$  were subsequently added, and the creamy white reaction mixture was warmed to -20 °C, and stirred for 3 h. The cold reaction mixture was then poured into sat.  $\text{NH}_4\text{Cl}$  (100 mL), the layers were separated, and the aqueous layer was extracted with AcOEt (3x20 mL). The combined organic layers were washed with sat.  $\text{NH}_4\text{Cl}$ , followed by brine, and then dried with  $\text{MgSO}_4$ , filtered, and concentrated. The residue was purified by chromatography eluting with 10:1 hexanes/AcOEt to provide a colorless oil (5.88 g, 87% yield).  $^1\text{H}$  NMR (300 MHz,  $\text{CDCl}_3$ )  $\delta$  4.15 (dd,  $J = 5.4, 11.6$  Hz, 1H), 3.97 (dd,  $J = 12.1, 5.3$  Hz, 1H), 1.43-1.30 (m, 1H), 1.30-1.18 (m, 1H), 0.92 (s, 1H), 0.76 (m, 1H), 0.20 (m, 1H), 0.12 (s, 3H), 0.10 (s, 3H).  $^{13}\text{C}$  NMR (75 MHz,  $\text{CDCl}_3$ )  $\delta$  63.8, 63.0, 25.7, 18.1, 17.3, 8.3, -5.4, -5.6. HRMS (FAB) calc. for  $[\text{C}_{11}\text{H}_{24}\text{O}_2\text{Si}]^+$  ( $[\text{M}]^+$ ) 216.1546, found 216.1552.

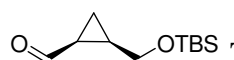

To a solution of oxalyl chloride (0.76 mL, 8.74 mmol) in dry  $\text{CH}_2\text{Cl}_2$  (40 mL) was added DMSO (1.24 mL, 17.5 mmol) dropwise at -78 °C under nitrogen. The reaction mixture was stirred for 30 min, and cyclopropyl alcohol (1.72 g, 7.94 mmol) was then added dropwise at -78 °C. After an additional 30 min of stirring, dry  $\text{Et}_3\text{N}$  (5.54 mL, 39.7 mmol) was added, and the reaction mixture was warmed to room temperature. Water (50 mL) was then added to the resulting mixture, and the biphasic mixture was transferred to a separatory funnel. The layers were separated, and the aqueous layer was extracted with ether (3 x 50 mL). The combined organic layers were washed with brine (50 mL), dried with  $\text{MgSO}_4$ , filtered, and concentrated. The residue was purified by chromatography eluting with 6:1 hexanes/ $\text{Et}_2\text{O}$  to provide a colorless oil (1.41 g, 83% yield).  $^1\text{H}$  NMR (500 MHz,  $\text{CDCl}_3$ )  $\delta$  9.41 (d,  $J = 5.0$  Hz, 1H), 3.97 (dd,  $J = 11.2, 5.4$  Hz, 1H), 3.63 (m, 1H), 2.02-1.91 (m, 1H), 1.82-1.73 (m, 1H), 1.37-1.32 (m, 1H), 1.25-1.20 (m, 1H), 0.87 (s, 9H), 0.04 (s, 3H), 0.03 (s, 3H).  $^{13}\text{C}$  NMR (167 MHz,  $\text{CDCl}_3$ )  $\delta$  201.4, 61.4, 27.9, 26.7, 26.3, 26.1, 18.7, 12.5. HRMS (FAB) calc. for  $[\text{C}_{11}\text{H}_{22}\text{O}_2\text{Si}]^+$  ( $[\text{M}]^+$ ) 214.1389, found 214.1387.

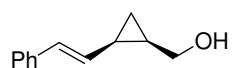

To a solution of benzyltriphenylphosphonium bromide (3.79 g, 8.75 mmol) in dry THF (60 mL) was added potassium *tert*-butoxide (1.01 g, 9.04 mmol) in one portion at room temperature. The reaction mixture was stirred at room temperature for one hour, and then it was cooled to -78 °C before 2-(*tert*-butyl-dimethyl-silyloxy)methyl)-cyclopropanecarbaldehyde (1.6 g, 7.5 mmol)

was added dropwise as a solution in THF (15 mL). The reaction mixture was subsequently warmed to room temperature, and stirred for an additional three hours. Saturated  $\text{NH}_4\text{Cl}$  (50 mL) was then added to the reaction mixture, and the biphasic mixture was transferred to a separatory funnel. The layers were separated, and the aqueous layer was extracted with AcOEt (3x10 mL). The combined organic layers were washed with brine (30 mL), dried over  $\text{MgSO}_4$ , filtered and concentrated. The residue obtained was dissolved in THF (15 mL) and a solution of TBAF in THF (5.50 mL, 5.50 mmol) was added dropwise at 0 °C. The reaction solution was stirred overnight at room temperature. Water (10 mL) was then added, and the biphasic mixture was transferred to a separatory funnel. The layers were separated, and the aqueous layer was extracted with AcOEt (3x10 mL). The combined organic layers were washed with brine (20 mL), dried with  $\text{MgSO}_4$ , filtered, and concentrated. The residue was purified by chromatography eluting with 1:1 hexanes/ $\text{Et}_2\text{O}$  to provide the desired product as a colorless oil (0.622 g, 61% yield over two steps). Obtained as a 2.2:1 mixture of diastereomers.  $^1\text{H}$  NMR (400 MHz,  $\text{CDCl}_3$ ) major diastereomer:  $\delta$  7.43-7.13 (m, 5H), 6.52 (d,  $J = 16.0$  Hz, 1H), 5.97 (m, 1H), 3.80-3.76 (m, 1H), 3.54-3.49 (m, 1H), 1.79-1.72 (m, 1H), 1.59 (bs, 1H), 1.52-1.38 (m, 1H), 1.07-1.01 (m, 1H), 0.57-0.53 (m, 1H); minor diastereomer:  $\delta$  5.40 (m, 1H), 2.02-1.94 (m, 1H), 0.50-0.46 (m, 1H).  $^{13}\text{C}$  NMR (167 MHz,  $\text{CDCl}_3$ )  $\delta$  137.3, 137.2, 130.9, 130.8, 130.7, 128.8, 128.7, 128.5, 128.3, 126.9, 126.8, 125.7, 63.8, 63.3, 22.1, 21.6, 19.1, 15.8, 13.7, 11.6. HRMS (FAB) calc. for  $[\text{C}_{12}\text{H}_{14}\text{O}]^+$  ( $[\text{M}]^+$ ) 174.1045, found 174.1050.

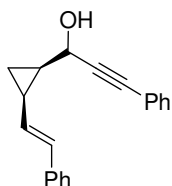

To a solution of oxalyl chloride (0.56 mL, 6.41 mmol) in dry  $\text{CH}_2\text{Cl}_2$  (30 mL) was added DMSO (0.90 mL, 12.8 mmol) dropwise under nitrogen at -78 °C. The reaction mixture was stirred for 30 min, and (2-styryl-cyclopropyl)-methanol (1.01 g, 5.82 mmol) was then added dropwise at -78 °C. After an additional 30 min of stirring, dry  $\text{Et}_3\text{N}$  (4.04 mL, 29.0 mmol) was subsequently added, and the reaction mixture was warmed to room temperature. Water (20 mL) was then added to the resulting mixture, and the biphasic mixture was transferred to a separatory funnel. The layers were separated, and the aqueous layer was extracted with DCM (3x10 mL). The combined organic layers were washed with brine (50 mL), dried with  $\text{MgSO}_4$ , filtered, and concentrated. To a solution of the obtained vinyl cyclopropyl aldehyde in ether (30 mL) at 0 °C was added phenylethynyl magnesium bromide (7.0 mL, 7.0 mmol) dropwise. The reaction mixture was then warmed to room temperature and stirred for two hours. Water (20 mL) was then added to the resulting mixture, and the biphasic mixture was transferred



to a separatory funnel. The layers were separated, and the aqueous layer was extracted with AcOEt (3x10 mL). The combined organic layers were washed with brine (50 mL), dried with MgSO<sub>4</sub>, filtered, and concentrated. The residue was purified by chromatography eluting with 8:1 hexanes/AcOEt to provide the desired product as a colorless oil (984 mg, 56% yield over two steps). Obtained as a 3.1:1 mixture of diastereomers. <sup>1</sup>H NMR (500 MHz, CD<sub>2</sub>Cl<sub>2</sub>) major diastereomer: δ 7.54-7.17 (m, 10H), 6.61-6.58 (d, *J* = 16.0 Hz, 1H), 6.25-6.20 (m, 1H), 4.42-4.40 (d, *J* = 8.5 Hz, 1H), 2.18 (bs, 1H), 1.94-1.88 (m, 1H), 1.68-1.62 (m, 1H), 1.23-1.16 (m, 1H), 0.95-0.90 (m, 1H). Minor diastereomer: δ 6.57-6.55 (d, *J* = 12.0 Hz, 1H), 5.57-5.52 (m, 1H), 4.38-4.36 (d, *J* = 12.0 Hz, 1H), 2.12-2.06 (m, 1H), 1.74-1.69 (m, 1H), 0.81-0.78 (m, 1H). HRMS (FAB) calc. for [C<sub>20</sub>H<sub>28</sub>O]<sup>+</sup> ([M]<sup>+</sup>) 274.1358, found 274.1362.

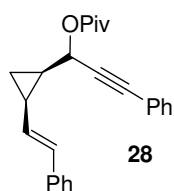

**28.** To a solution of the previously obtained alcohol (900 mg, 3.28 mmol) in dry CH<sub>2</sub>Cl<sub>2</sub> (16.5 mL) were added Et<sub>3</sub>N (0.69 mL, 4.92 mmol) and DMAP (41 mg, 0.33 mmol) at room temperature. The solution was then cooled at 0 °C, and pivaloyl chloride (0.48 mL, 3.94 mmol) was added dropwise. The reaction mixture was then stirred overnight at room temperature. A saturated solution of NaHCO<sub>3</sub> (10 mL) was then added, and the biphasic mixture was transferred to a separatory funnel. The layers were separated, and the aqueous layer was extracted with DCM (3x30 mL). The combined organic layers were washed with brine (20 mL), dried with Na<sub>2</sub>SO<sub>4</sub>, filtered and concentrated. The residue was purified by chromatography eluting with AcOEt/hexanes (1:25) to provide a colorless oil (1.07 g, 91% yield). <sup>1</sup>H NMR (500 MHz, CD<sub>2</sub>Cl<sub>2</sub>) δ 7.45 (m, 2H), 7.33 (m, 3H), 7.28 (m, 4H), 7.19 (m, 1H), 6.53 (d, *J* = 15.0 Hz, 1H), 5.94 (dd, *J* = 5.0, 15.0 Hz, 1H), 5.30 (d, *J* = 10.0 Hz, 1H), 1.89 (m, 1H), 1.80 (m, 1H), 1.12 (s, 9H), 0.85 (m, 1H). <sup>13</sup>C NMR (167 MHz, CD<sub>2</sub>Cl<sub>2</sub>) δ 177.3, 138.0, 132.3, 131.6, 129.2, 129.0, 128.9, 128.8, 127.4, 126.3, 122.9, 87.3, 84.9, 65.2, 39.0, 27.2, 24.0, 20.8, 12.14. Anal. Calc.: C, 83.76; H, 7.31, found C, 83.67; H, 7.42.

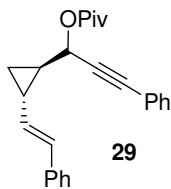

**29.** Obtained as a 1:1 mixture of diastereomers about the propargylic position. <sup>1</sup>H NMR (400 MHz, CDCl<sub>3</sub>) δ 7.59-7.55 (m, 4H), 7.41-7.38 (m, 14H), 7.33-7.28 (m, 2H), 6.60 (dd, *J* = 12.0 and 15.6 Hz, 2H), 5.93 (dt, *J* = 8.4 and 15.6 Hz, 2H), 5.77 (d, *J* = 6.4 Hz, 1H), 5.73 (d, *J* = 6.8 Hz, 1H), 2.03-1.96 (m, 1H), 1.96-1.89 (m, 1H), 1.67 (m, 2H), 1.39 (s, 9H), 1.38 (s, 9H). 1.31-1.21 (m, 2H), 1.02-

0.9 (m, 2H).  $^{13}\text{C}$  NMR (100 MHz,  $\text{CDCl}_3$ )  $\delta$  177.2, 137.2, 137.1, 131.8, 131.7, 131.6, 131.5, 128.6, 128.5, 128.4, 128.3, 128.1, 126.7, 125.5, 122.0, 121.9, 84.5, 84.3, 66.2, 66.1, 38.6, 26.9, 23.9, 23.6, 20.4, 19.0, 12.1, 11.2. HRMS (FAB) calc. for  $[\text{C}_{25}\text{H}_{26}\text{O}_2]^+$  ( $[\text{M}]^+$ ) 358.1933, found 358.1937.

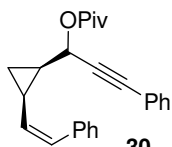

**30.**  $^1\text{H}$  NMR (300 MHz,  $\text{CDCl}_3$ )  $\delta$  7.49-7.43 (m, 2H), 7.37-7.28 (m, 7H), 7.26-7.21 (m, 1H), 6.49 (d,  $J = 15.2$  Hz, 1H), 5.36 (dd,  $J = 12.8$  and  $15.2$  Hz, 1H), 5.28 (d,  $J = 13.6$  Hz, 1H), 2.12 (m, 1H), 1.85 (m, 1H), 1.24 (m, 1H), 1.18 (s, 9H), 0.75 (q,  $J = 7.6$  Hz, 1H).  $^{13}\text{C}$  NMR (75 MHz,  $\text{CDCl}_3$ )  $\delta$  177.3, 137.4, 132.0, 131.6, 131.0, 130.0, 128.9, 128.6, 128.3, 128.2, 126.9, 126.8, 122.5, 86.8, 84.5, 65.2, 38.8, 27.1, 24.0, 17.3, 13.9. HRMS (FAB) calc. for  $[\text{C}_{25}\text{H}_{26}\text{O}_2]^+$  ( $[\text{M}]^+$ ) 358.1933, found 358.1936.

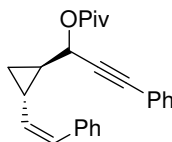

**31.** Obtained as a 1:1 mixture of diastereomers about the propargylic position.  $^1\text{H}$  NMR (400 MHz,  $\text{CDCl}_3$ )  $\delta$  7.59-7.57 (m, 4H), 7.50-7.46 (m, 6H), 7.41-7.34 (m, 8H), 7.30-7.29 (m, 2H), 6.50 (d,  $J = 11.6$  Hz, 1H), 6.47 (d,  $J = 11.6$  Hz, 1H), 5.72 (d,  $J = 6.4$  Hz, 1H), 5.66 (d,  $J = 6.8$  Hz, 1H), 5.23 (t,  $J = 10.8$  Hz, 1H), 5.19 (t,  $J = 10.4$  Hz, 1H), 2.33-2.25 (m, 2H), 1.65-1.56 (m, 2H), 1.32 (s, 9H), 1.30 (s, 9H), 1.16 (m, 2H), 0.87 (m, 2H).  $^{13}\text{C}$  NMR (100 MHz,  $\text{CDCl}_3$ )  $\delta$  177.6, 1177.5, 137.6, 137.5, 133.9, 133.8, 132.0, 131.9, 128.9, 128.8, 128.7, 128.6, 128.3, 128.2, 126.7, 122.3, 122.2, 85.8, 85.6, 84.8, 84.6, 66.3, 66.2, 38.9, 38.8, 27.2, 27.1, 24.6, 24.3, 17.5, 16.3, 13.4, 12.3. HRMS (FAB) calc. for  $[\text{C}_{25}\text{H}_{26}\text{O}_2]^+$  ( $[\text{M}]^+$ ) 358.1933, found 358.1937.

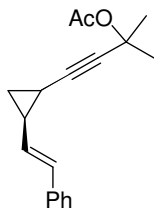

**34.**  $^1\text{H}$  NMR (300 MHz,  $\text{CDCl}_3$ )  $\delta$  7.40 (d,  $J = 7.3$  Hz, 2H), 7.30 (t,  $J = 7.6$  Hz, 2H), 7.19 (t,  $J = 7.3$  Hz, 1H), 6.57 (d,  $J = 16.0$  Hz, 1H), 6.10 (dd,  $J = 9.2$  and  $16.0$  Hz, 1H), 1.96 (s, 3H), 1.90-1.82 (m, 1H), 1.70 (dt,  $J = 5.7$  and  $8.2$  Hz, 1H), 1.64 (m, 3H), 1.63 (m, 3H), 1.28-1.23 (m, 1H), 0.89 (q,  $J = 6.0$  Hz, 1H).  $^{13}\text{C}$  NMR (75 MHz,  $\text{CDCl}_3$ )  $\delta$  169.3, 137.6, 130.4, 130.0, 128.4, 126.8, 125.8, 84.5, 79.8, 72.3, 29.3, 29.1, 22.0, 21.9, 16.4, 8.2. HRMS (FAB) calc. for  $[\text{C}_{18}\text{H}_{20}\text{O}_2]^+$  ( $[\text{M}]^+$ ) 268.1463, found 268.1465.

*General procedure for Au(I)-catalyzed rearrangements of propargylic esters:*

A mixture of Ph<sub>3</sub>PAuCl (1 mol%) and AgSbF<sub>6</sub> (1 mol%) in 0.3 mL of CH<sub>2</sub>Cl<sub>2</sub> was stirred at room temperature for 5 minutes. Then, it was added to a 1 dram vial covered with a threaded cap containing a magnetic stir bar and the corresponding propargylic ester (100mg, 1 equiv.) in CH<sub>2</sub>Cl<sub>2</sub> (0.1 M, rt). The resulting reaction mixture was then stirred at room temperature and monitored by TLC or <sup>1</sup>H NMR. Upon completion, the crude oil was purified by column chromatography to give the desired substrate.

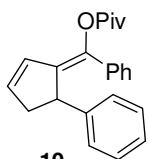

**10**

**10.** Obtained as an 87:13 mixture of olefins about the exocyclic double bond. <sup>1</sup>H NMR (300 MHz, CDCl<sub>3</sub>) major diastereomer: δ 7.42-7.11 (m, 10H), 6.50 (m, 1H), 6.15 (m, 1H), 4.35 (d, *J* = 8.0 Hz, 1H), 3.25 (ddt, *J* = 2.5, 8.0 and 18.0 Hz, 1H), 2.56 (d, *J* = 18.0 Hz, 1H), 1.40 (s, 9H). Minor diastereomer (diagnostic peaks): δ 6.64 (m, 1H), 6.15 (m, 1H), 4.23 (d, *J* = 8.4 Hz, 1H), 3.22 (m, 1H), 2.46 (d, *J* = 18.4 Hz, 1H), 0.99 (s, 9H). <sup>13</sup>C NMR (75 MHz, CDCl<sub>3</sub>) δ 176.9, 145.6, 145.3, 140.1, 138.7, 138.6, 138.5, 137.7, 136.1, 135.2, 131.4, 130.2, 128.3, 128.2, 128.1, 127.8, 127.7, 127.5, 127.4, 127.1, 127.0, 126.9, 126.1, 125.9, 45.7, 45.2, 44.4, 44.0, 39.0, 31.6, 27.2, 26.7, 25.3, 22.6, 14.1. HRMS (FAB) calc. for [C<sub>23</sub>H<sub>24</sub>O<sub>2</sub>]<sup>+</sup> ([M]<sup>+</sup>) 332.1776, found 332.1773.

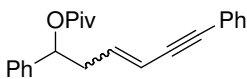

**11**

**11.** Obtained as a mixture of olefins (*E:Z* = 87:13). <sup>1</sup>H NMR (400 MHz, C<sub>6</sub>D<sub>6</sub>) major diastereomer δ 7.51-7.45 (m, 2H), 7.21-7.15 (m, 2H), 7.14-7.11 (m, 1H), 7.06-6.99 (m, 5H), 6.22 (dt, *J* = 7.2 and 15.6 Hz, 1H), 5.96 (dd, *J* = 5.2 and 7.6 Hz, 1H), 5.75 (d, *J* = 15.6 Hz, 1H), 2.47 (m, 2H), 1.20 (s, 9H). <sup>13</sup>C NMR (100 MHz, C<sub>6</sub>D<sub>6</sub>) δ 177.0, 176.5, 141.0, 139.4, 132.2, 129.0, 128.9, 126.9, 124.4, 113.8, 90.0, 88.8, 74.5, 40.9, 39.2, 27.6. HRMS (FAB) calc. for [C<sub>23</sub>H<sub>24</sub>O<sub>2</sub>]<sup>+</sup> ([M]<sup>+</sup>) 332.1776, found 332.1781.

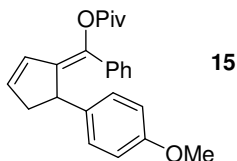

**15**

**15.** Obtained as a 75:25 mixture of olefins about the exocyclic double bond. <sup>1</sup>H NMR (400 MHz, CDCl<sub>3</sub>) major diastereomer: δ 7.44 (m, 1H), 7.26-7.21 (m, 2H), 7.19-7.13 (m, 2H), 7.09 (d, *J* = 8.6 Hz, 2H), 6.76 (d, *J* = 8.6 Hz, 2H), 6.46 (m, 1H), 6.13 (m, 1H), 4.27 (d, *J* = 7.2 Hz, 1H), 3.76 (s, 3H), 3.19 (m, 1H), 2.50 (d, *J* = 16.8 Hz, 1H), 1.38 (s, 9H). Minor diastereomer (diagnostic

peaks):  $\delta$  6.84 (d,  $J = 8.6$  Hz, 2H), 6.61 (m, 1H), 6.13 (m, 1H), 4.16 (dd,  $J = 2.4$  and 8.4 Hz, 1H), 3.80 (s, 3H), 3.17 (m, 1H), 2.41 (dd,  $J = 2.0$  and 18.0 Hz, 1H), 0.99 (s, 9H).  $^{13}\text{C}$  NMR (100 MHz,  $\text{CDCl}_3$ )  $\delta$  176.9, 176.0, 157.8, 157.7, 138.9, 138.5, 138.0, 137.7, 137.6, 136.5, 136.2, 135.2, 130.1, 128.2, 128.0, 127.9, 127.7, 127.5, 127.4, 126.8, 113.7, 55.3, 55.1, 44.9, 44.5, 44.4, 44.1, 39.0, 38.7, 27.2, 26.8. HRMS (FAB) calc. for  $[\text{C}_{24}\text{H}_{26}\text{O}_3]^+$  ( $[\text{M}]^+$ ) 362.1882, found 362.1878.

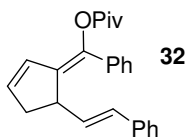

**32.** Obtained as a 70:30 mixture of olefins about the tetrasubstituted olefin.  $^1\text{H}$  NMR (400 MHz,  $\text{CD}_2\text{Cl}_2$ ) major diastereomer:  $\delta$  7.55-7.51 (m, 2H), 7.48-7.15 (m, 8H), 6.39 (dt,  $J = 2.1$  and 5.7 Hz, 1H), 6.29 (d,  $J = 16.5$  Hz, 1H), 6.15 (m, 1H), 6.08 (dd,  $J = 7.5$  and 15.9 Hz, 1H), 4.05 (t,  $J = 7.5$  Hz, 1H), 3.05 (ddt,  $J = 2.4$ , 7.8 and 18.0 Hz, 1H), 2.50 (ddt,  $J = 1.8$ , 3.0 and 18.0 Hz, 1H), 1.37 (s, 9H). Minor diastereomer (diagnostic peaks)  $\delta$  6.53 (m, 1H), 6.49 ( $J = 16.2$  Hz, 1H), 6.27 (dd,  $J = 7.5$  and 15.9 Hz, 1H), 6.18 (m, 1H), 3.84 (dt,  $J = 1.6$  and 7.8 Hz, 1H), 3.05-2.97 (m, 1H), 2.50-2.43 (m, 1H), 1.21 (s, 9H);  $^{13}\text{C}$  NMR (100 MHz,  $\text{CD}_2\text{Cl}_2$ )  $\delta$  177.2, 177.0, 140.7, 139.0, 138.8, 138.5, 138.2, 138.1, 138.0, 137.1, 136.9, 136.2, 132.8, 132.6, 132.0, 130.1, 129.9, 129.7, 129.4, 129.0, 128.9, 128.8, 128.6, 128.5, 128.3, 128.2, 128.1, 128.0, 127.8, 27.4, 16.5, 11.0. HRMS (FAB) calc. for  $[\text{C}_{25}\text{H}_{26}\text{O}_2]^+$  ( $[\text{M}]^+$ ) 358.1933, found 358.1939.

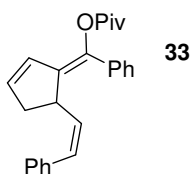

**33.** Obtained as a 85:15 mixture of diastereomers about the tetrasubstituted olefin.  $^1\text{H}$  NMR (400 MHz,  $\text{CDCl}_3$ ) major diastereomer:  $\delta$  7.39-7.24 (m, 3H), 7.18-7.14 (m, 4H), 7.12-7.08 (m, 1H), 7.04-7.01 (m, 2H), 6.30-6.27 (m, 1H), 6.25 (d,  $J = 11.6$  Hz, 1H), 6.17-6.14 (m, 1H), 5.56 (dd,  $J = 10.8$  and 11.6 Hz, 1H), 4.35 (t,  $J = 8.4$  Hz, 1H), 3.14 (ddt,  $J = 2.6$ , 8.0 and 18.0 Hz, 1H), 2.58 (dd,  $J = 2.6$  and 18.0 Hz, 1H), 1.33 (s, 9H). Minor diastereomer (diagnostic peaks):  $\delta$  6.45 (m, 1H), 6.37 (d,  $J = 11.2$  Hz, 1H), 5.79 (dd,  $J = 9.2$  and 11.2 Hz, 1H), 4.16 (t,  $J = 8.4$  Hz, 1H), 2.49 (d,  $J = 17.6$  Hz, 1H), 1.01 (s, 9H).  $^{13}\text{C}$  NMR (400 MHz,  $\text{CDCl}_3$ )  $\delta$  177.1, 139.6, 138.7, 137.6, 137.5, 135.6, 129.9, 129.3, 129.2, 128.8, 128.7, 128.6, 128.5, 128.4, 128.0, 127.8, 127.4, 127.1, 42.8, 39.4, 38.9, 27.5, 27.3. HRMS (FAB) calc. for  $[\text{C}_{25}\text{H}_{26}\text{O}_2]^+$  ( $[\text{M}]^+$ ) 358.1933, found 358.1936.

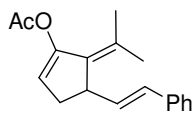

**36.**  $^1\text{H}$  NMR (400 MHz,  $\text{CDCl}_3$ )  $\delta$  7.36 (d,  $J = 7.3$  Hz, 1H), 7.30-7.26 (m, 7H), 7.21-7.17 (m, 1H), 6.39 (d,  $J = 15.6$  Hz, 1H), 6.18 (dd,  $J = 8.0$  and 15.6 Hz, 1H), 5.68 (bs, 1H), 3.61 (t,  $J = 8.0$  Hz, 1H), 2.82 (dd,  $J = 8.0$  and 17.2 Hz, 1H), 2.22 (s, 3H), 2.20-2.16 (m, 1H), 1.87 (s, 3H), 1.73 (s, 3H).  $^{13}\text{C}$  NMR (100 MHz,  $\text{CDCl}_3$ )  $\delta$  168.5, 149.8, 137.6, 132.7, 132.4, 128.4, 128.3, 128.2, 127.9, 126.9, 126.1, 125.4, 119.3, 43.6, 33.9, 22.9, 21.3, 19.5. HRMS (FAB) calc. for  $[\text{C}_{18}\text{H}_{20}\text{O}_2]^+$  ( $[\text{M}]^+$ ) 268.1463, found 268.1465.

## 2.2. Au(I)-catalyzed Claisen rearrangement of propargyl vinyl ethers.

*General procedure for the preparation of propargyl vinyl ethers.*

The corresponding propargyl alcohol (1 equiv) was dissolved in ethyl vinyl ether (0.45 M) and mercuric acetate (66.6 mol%) was added. The resulting solution was stirred at rt for a minimum of 12 h and quenched with a 1:1 mixture of brine:5% KOH solution. The aqueous layer was extracted with hexanes, and the combined extracts washed with brine, dried over  $\text{MgSO}_4$ , filtered, and concentrated. The crude residue was purified by flash column chromatography.

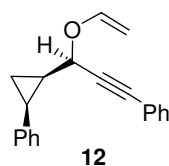

**12.**  $^1\text{H}$  NMR (400 MHz,  $\text{CDCl}_3$ )  $\delta$  7.51-7.45 (m, 3H), 7.40-7.30 (m, 5H), 7.28-7.21 (m, 2H), 6.18 (dd,  $J = 6.4$  and 14.0 Hz, 1H), 4.31 (d,  $J = 14.0$  Hz, 1H), 4.01 (d,  $J = 6.4$  Hz, 1H), 3.80 (d,  $J = 9.2$  Hz, 1H), 2.49 (q,  $J = 8.0$  Hz, 1H), 1.85 (m, 1H), 1.28 (m, 1H), 1.07 (d,  $J = 5.6$  Hz, 1H).  $^{13}\text{C}$  NMR (100 MHz,  $\text{CDCl}_3$ )  $\delta$  149.5, 137.2, 131.8, 129.7, 128.4, 128.2, 128.0, 126.4, 122.4, 89.6, 86.9, 85.6, 69.3, 23.4, 22.2, 7.5. HRMS (FAB) calc. for  $[\text{C}_{20}\text{H}_{18}\text{O}]^+$  ( $[\text{M}]^+$ ) 274.1358, found 274.1362.

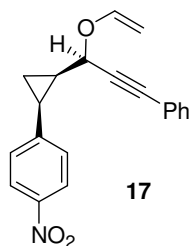

**17.**  $^1\text{H}$  NMR (400 MHz,  $\text{CD}_2\text{Cl}_2$ )  $\delta$  8.14 (d,  $J = 8.8$  Hz, 1H), 7.51 (d,  $J = 8.8$  Hz, 1H), 7.33 (s, 5H), 6.40 (dd,  $J = 6.8$  and 14.0 Hz, 1H), 4.32 (dd,  $J = 1.6$  and 14.0 Hz, 1H), 4.08 (dd,  $J = 1.6$  and 6.8 Hz, 1H), 3.75 (d,  $J = 9.6$  Hz, 1H), 2.50 (q,  $J = 8.4$  Hz, 1H), 1.90 (ddt,  $J = 5.6, 8.8$  and 17.6 Hz, 1H), 1.37-1.21 (m, 2H).  $^{13}\text{C}$  NMR (100 MHz,  $\text{CD}_2\text{Cl}_2$ )  $\delta$  149.8, 147.1, 146.1, 131.9, 130.6, 129.1,

128.7, 123.5, 122.4, 90.2, 87.1, 86.3, 70.5, 24.6, 21.2, 9.9. HRMS (FAB) calc. for  $[\text{C}_{20}\text{H}_{17}\text{NO}_3]^+$  ( $[\text{M}]^+$ ) 319.1208, found 319.1211.

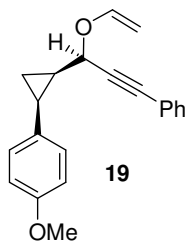

**19.**  $^1\text{H}$  NMR (400 MHz,  $\text{CD}_2\text{Cl}_2$ )  $\delta$  7.43-7.41 (m, 2H), 7.36-7.29 (m, 3H), 7.21 (d,  $J = 8.4$  Hz, 2H), 6.83 (d,  $J = 8.4$  Hz, 2H), 6.17 (dd,  $J = 6.8$  and 14.0 Hz, 1H), 4.24 (dd,  $J = 1.6$  and 14.0 Hz, 1H), 4.96 (dd,  $J = 1.6$  and 6.8 Hz, 1H), 3.78 (s, 3H), 3.74 (d,  $J = 9.2$  Hz, 1H), 2.36 (q,  $J = 8.0$  Hz, 1H), 1.72 (ddt,  $J = 5.6, 8.8$  and 18.0 Hz, 1H), 1.18 (dt,  $J = 5.6$  and 8.8 Hz, 1H), 0.95 (q,  $J = 5.6$  Hz, 1H).  $^{13}\text{C}$  NMR (100 MHz,  $\text{CD}_2\text{Cl}_2$ )  $\delta$  158.7, 150.0, 132.0, 131.0, 129.6, 128.9, 128.7, 122.8, 113.8, 89.6, 87.6, 85.7, 69.8, 23.6, 21.7, 7.7. HRMS (FAB) calc. for  $[\text{C}_{21}\text{H}_{20}\text{O}_2]^+$  ( $[\text{M}]^+$ ) 304.1463, found 304.1461.

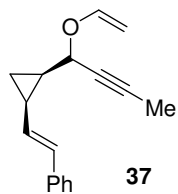

**37.** Obtained as a 60:40 mixture of diastereomers about the propargylic position.  $^1\text{H}$  NMR (400 MHz,  $\text{CDCl}_3$ )  $\delta$  7.37-7.28 (m, 4H), 7.24-7.17 (m, 1H), 6.55 (d,  $J = 16.0$  Hz, 1H), 6.48 (dd,  $J = 6.6$  and 14.0 Hz, 1H), 6.10 (dd,  $J = 8.2$  and 16.0 Hz, 1H), 4.44 (dd,  $J = 1.6$  and 14.0 Hz, 1H), 4.13 (dd,  $J = 1.6$  and 6.6 Hz, 1H), 4.11-4.06 (m, 1H), 1.85 (d,  $J = 2.0$  Hz, 1H), 1.89-1.85 (m, 1H), 1.60 (m, 1H), 1.14 (m, 1H), 0.83 (q,  $J = 5.6$  Hz, 1H). Minor diastereomer (diagnostic peaks)  $\delta$  6.51 (d,  $J = 15.6$  Hz, 1H), 6.40 (dd,  $J = 6.8$  and 14.4 Hz, 1H), 6.08 (dd,  $J = 7.8$  and 15.6 Hz, 1H), 4.39 (dd,  $J = 2.0$  and 14.4 Hz, 1H), 1.89 (d,  $J = 2.0$  Hz, 1H), 1.89-1.85 (m, 1H), 1.60 (m, 1H), 1.14 (m, 1H), 0.74 (q,  $J = 5.6$  Hz, 1H). HRMS (FAB) calc. for  $[\text{C}_{17}\text{H}_{18}\text{O}]^+$  ( $[\text{M}]^+$ ) 238.1358, found 238.1361.

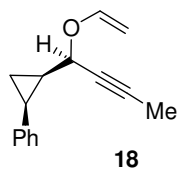

**18.** Obtained as a 1:1 mixture of diastereomers about the propargylic position.  $^1\text{H}$  NMR (400 MHz,  $\text{CDCl}_3$ )  $\delta$  7.33-7.25 (m, 4H), 7.24-7.16 (m, 1H), 6.06 (dd,  $J = 6.8$  and 14.0 Hz, 1H), 4.09 (dd,  $J = 1.6$  and 14.0 Hz, 1H), 3.85 (dd,  $J = 1.6$  and 6.8 Hz, 1H), 3.59 (m, 1H), 2.39 (q,  $J = 8.4$  Hz, 1H), 1.84 (d,  $J = 2.4$  Hz, 3H), 1.65 (dt,  $J = 5.6$  and 8.8 Hz, 1H), 1.17 (dt,  $J = 5.6$  and 8.4 Hz, 1H), 1.02 (q,  $J = 5.6$  Hz, 1H). HRMS (FAB) calc. for  $[\text{C}_{15}\text{H}_{16}\text{O}]^+$  ( $[\text{M}]^+$ ) 212.1201, found 212.1204.

*General Procedure for the Au(I)-Catalyzed Claisen Rearrangement of Propargyl Vinyl Ethers:*

To a solution of propargyl vinyl ether (1 equiv) in CH<sub>2</sub>Cl<sub>2</sub> (0.35 M) was added [(Ph<sub>3</sub>PAu)<sub>3</sub>O]BF<sub>4</sub> (1 mol%) and the resulting mixture was maintained at the indicated temperature until TLC analysis indicated consumption of the starting material.

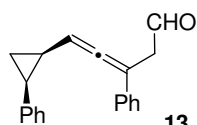

**13** **13.** Obtained as a 55:45 mixture of allenes. <sup>1</sup>H NMR (400 MHz, CD<sub>2</sub>Cl<sub>2</sub>) δ 9.68 (bs, 1H), 9.57 (bs, 1H), 7.41-7.11 (m, 20H), 5.27 (bd, *J* = 7.6 Hz, 1H), 5.21 (bd, *J* = 8.0 Hz, 1H), 3.39 (bs, 4H), 3.16 (m, 4H), 2.49 (m, 2H), 1.92 (m, 2H), 1.40-1.24 (m, 2H), 1.18-1.05 (m, 2H). <sup>13</sup>C NMR (75 MHz, CD<sub>2</sub>Cl<sub>2</sub>) δ 206.7, 200.5, 139.2, 136.2, 130.2, 130.0, 129.0, 128.7, 128.6, 127.5, 126.8, 126.7, 126.3, 126.2, 99.4, 99.3, 95.9, 95.8, 45.5, 45.4, 24.3, 23.7, 18.6, 17.9, 11.4, 11.3. HRMS (FAB) calc. for [C<sub>20</sub>H<sub>18</sub>O]<sup>+</sup> ([M]<sup>+</sup>) 274.1358, found 274.1362.

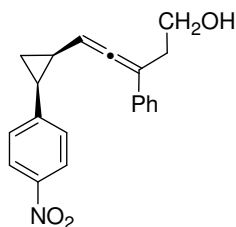

**18.** Aldehyde **18** was found to be unstable, and for characterization purposes was reduced to the corresponding alcohol following the procedure reported in the literature.<sup>6</sup> The reaction mixture was diluted with MeOH (2x the volume of CH<sub>2</sub>Cl<sub>2</sub>) and NaBH<sub>4</sub> (1.0 equiv) was added. The resulting solution was maintained at rt for 1 h, concentrated, and purified by flash column chromatography (hexanes:AcOEt = 25:1) to yield the desired alcohol as a 81:19 mixture of allenes. <sup>1</sup>H NMR (400 MHz, CDCl<sub>3</sub>) major diastereomer δ 8.08 (d, *J* = 8.8 Hz, 2H), 7.32 (d, *J* = 8.8 Hz, 2H), 7.21-7.10 (m, 5H), 4.96 (m, 1H), 3.68 (t, *J* = 6.4 Hz, 2H), 2.53 (m, 2H), 2.40 (q, *J* = 8.0 Hz, 1H), 1.93 (m, 1H), 1.56 (bs, 1H), 1.36 (m, 1H), 1.12 (q, *J* = 6.0 Hz, 1H). <sup>13</sup>C NMR (100 MHz, CDCl<sub>3</sub>) δ 205.5, 204.5, 147.0, 146.6, 146.3, 136.0, 135.8, 131.5, 130.1, 129.9, 129.7, 128.6, 128.4, 128.3, 127.2, 127.1, 126.1, 125.9, 123.3, 103.7, 93.6, 93.3, 63.6, 60.9, 33.4, 33.2, 26.2, 23.8, 23.3, 21.0, 19.4, 12.2, 11.5. HRMS (FAB) calc. for [C<sub>20</sub>H<sub>19</sub>NO<sub>3</sub>]<sup>+</sup> ([M]<sup>+</sup>) 321.1365, found 321.1369.

<sup>6</sup> Sherry, B. D.; Toste, F. D. *J. Am. Chem. Soc.* **2004**, *126*, 15978.

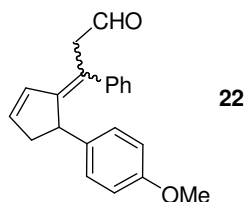

**22.** Obtained as a 77:23 mixture of diastereomers.  $^1\text{H}$  NMR (400 MHz,  $\text{CD}_3\text{NO}_2$ ) (major diastereomer)  $\delta$  9.63 (t,  $J = 2.0$  Hz, 1H), 7.21-7.11 (m, 3H), 7.06-7.00 (m, 2H), 6.78 (d,  $J = 8.4$  Hz, 2H), 6.69 (dt,  $J = 2.0$  and 5.8 Hz, 1H), 6.63 (d,  $J = 8.4$  Hz, 2H), 6.34 (dt,  $J = 2.8$  and 5.8 Hz, 1H), 4.17 (d,  $J = 8.0$  Hz, 1H), 3.72 (s, 3H), 3.66 (m, 2H), 3.15 (ddt,  $J = 2.0, 8.4$  and 18.0 Hz, 1H), 2.41 (dd,  $J = 2.0$  and 18.0 Hz, 1H), 2.10 (s, 2H). Minor diastereomer (diagnostic peaks)  $\delta$  9.11 (t,  $J = 2.0$  Hz, 1H), 7.26 (d,  $J = 8.0$  Hz, 2H), 6.91 (d,  $J = 8.0$  Hz, 2H), 6.48 (dt,  $J = 2.0$  and 5.6 Hz, 1H), 6.23 (dt,  $J = 2.8$  and 5.6 Hz, 1H), 4.15 (m, 1H), 3.81 (s, 3H), 3.38 (m, 2H), 3.25 (ddt,  $J = 2.0, 8.0$  and 18.0 Hz, 1H), 2.46 (m, 1H), 2.07 (s, 2H).  $^{13}\text{C}$  NMR (100 MHz,  $\text{CD}_3\text{NO}_2$ )  $\delta$  200.2, 158.2, 157.5, 151.8, 151.5, 142.4, 139.0, 138.9, 138.3, 138.2, 138.1, 131.1, 128.7, 128.3, 128.2, 128.1, 127.9, 127.8, 126.8, 126.3, 123.6, 122.8, 113.9, 113.1, 54.5, 54.4, 50.2, 49.0, 45.3, 44.7, 43.9, 43.4. HRMS (FAB) calc. for  $[\text{C}_{21}\text{H}_{20}\text{O}_2]^+$  ( $[\text{M}]^+$ ) 304.1463, found 304.1460.

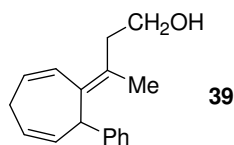

Aldehyde **39** was found to be unstable, and for characterization purposes was reduced to the corresponding alcohol. Thus, the reaction mixture was diluted with MeOH (2x the volume of  $\text{CH}_2\text{Cl}_2$ ) and  $\text{NaBH}_4$  (1.0 equiv) was added. The resulting solution was maintained at rt for 1 h, concentrated, and purified by flash column chromatography (hexanes:AcOEt = 25:1).  $^1\text{H}$  NMR (400 MHz,  $\text{CDCl}_3$ )  $\delta$  7.30-7.21 (m, 3H), 7.20-7.12 (m, 2H), 6.32 (d,  $J = 12$  Hz, 1H), 6.09 (m, 1H), 5.91 (dt,  $J = 5.2$  and 10.4 Hz, 1H), 5.47 (dt,  $J = 4.8$  and 10.8 Hz, 1H), 4.81 (d,  $J = 8.0$  Hz, 1H), 3.77 (m, 2H), 2.79 (m, 2H), 2.57 (m, 1H), 2.47 (m, 1H), 1.96 (s, 3H), 1.41 (t,  $J = 5.6$  Hz, 1H).  $^{13}\text{C}$  NMR (100 MHz,  $\text{CDCl}_3$ )  $\delta$  142.7, 134.7, 130.7, 130.0, 128.9, 128.2, 128.0, 127.4, 127.1, 125.8, 61.1, 45.9, 38.3, 30.9, 19.1. HRMS (FAB) calc. for  $[\text{C}_{17}\text{H}_{20}\text{O}]^+$  ( $[\text{M}]^+$ ) 240.1514, found 240.1519.

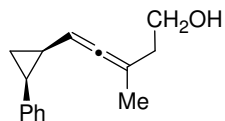

Methyl substituted allenyl aldehyde **19** was found to be unstable, and for characterization purposes was reduced to the corresponding alcohol. Thus, the reaction mixture was diluted with MeOH (2x the volume of  $\text{CH}_2\text{Cl}_2$ ) and  $\text{NaBH}_4$  (1.0 equiv) was added. The resulting solution was maintained at rt for 1 h, concentrated, and purified by flash column chromatography (hexanes:AcOEt = 25:1) to yield the desired alcohol as a 60:40 mixture of allenes.  $^1\text{H}$  NMR (400 MHz,



CDCl<sub>3</sub>) major diastereomer  $\delta$  7.37-7.29 (m, 3H), 7.26-7.18 (m, 2H), 4.75 (m, 1H), 3.69 (t,  $J$  = 6.0 Hz, 2H), 2.39 (m, 1H), 2.17 (m, 2H), 1.85 (bs, 1H), 1.81-1.71 (m, 2H), 1.57 (d,  $J$  = 2.8 Hz, 3H), 1.26 (m, 1H), 1.03 (q,  $J$  = 5.6 Hz, 1H). Minor diastereomer (diagnostic peaks)  $\delta$  4.68 (m, 1H), 3.60 (t,  $J$  = 6.0 Hz, 2H), 1.24 (ddt,  $J$  = 2.8., 6.0 and 12.0 Hz, 1H), 1.68 (d,  $J$  = 2.4 Hz, 3H), 0.99 (q,  $J$  = 5.6 Hz, 1H). <sup>13</sup>C NMR (100 MHz, CDCl<sub>3</sub>)  $\delta$  202.2, 201.8, 138.7, 138.5, 129.4, 129.3, 128.2, 127.9, 127.8, 125.9, 125.8, 125.5, 97.6, 97.1, 90.7, 90.5, 60.5, 60.4, 36.9, 23.4, 22.9, 19.3, 19.2, 18.3, 18.2, 10.9, 10.4. HRMS (FAB) calc. for [C<sub>15</sub>H<sub>18</sub>O]<sup>+</sup> ([M]<sup>+</sup>) 214.1358, found 214.1262.

## 2.3. Other experiments

### 2.3.1. O<sup>18</sup> labeling experiment

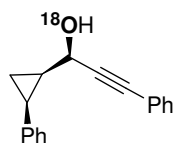

In an oven-dried round bottom flask, *cis*-2-phenyl isopropyl carbonyl alcohol (147 mg, 1.00 mmol) was dissolved in dry tetrahydrofuran (2 mL). Isotopically labelled water (200 mg, 0.2 mL, 10 equiv, 95-98 % H<sub>2</sub><sup>18</sup>O) was added via syringe, and then gaseous hydrogen chloride (generated by the addition of H<sub>2</sub>SO<sub>4</sub> to solid NaCl) was bubbled through the solution for a brief period of time (ca. 10 s). The resulting solution was stirred at room temperature for 10 h, after which time the solution was canulated into a second oven-dried round bottom flask containing anhydrous magnesium sulfate to remove the excess water. Stirring of the resulting heterogeneous mixture was continued for 30 min. The <sup>18</sup>O-labelled aldehyde solution thus obtained was filtered *via* canula to a flask containing a THF solution of 1-lithio phenylacetylene (10.0 mmol, 1.0 M) at -78 °C. The resulting mixture was warmed to room temperature for 2 h. The reaction was quenched by the addition of sat. NH<sub>4</sub>Cl solution and the biphasic mixture transferred to a separatory funnel and partitioned. The aqueous layer was extracted with AcOEt (3x5 mL), and the combined organic layers were washed with brine (10 mL) dried (MgSO<sub>4</sub>), filtered and concentrated. The crude product could be purified by column chromatography 10:1 hexanes:AcOEt to afford pure, isotopically labelled alcohol as a white solid with identical spectroscopic characteristics as the non-labeled compound. GC-MS analysis of the product thus obtained indicated an isotopic composition of between 80-85% <sup>18</sup>O depending on the run.

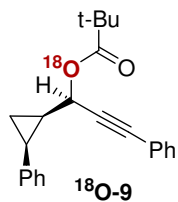

$^{18}\text{O-9}$  was obtained from the previously obtained isotopically labelled alcohol by using the same procedure applied for the preparation of unlabelled **9**. This procedure affords pure, isotopically labelled  $^{18}\text{O-9}$  as a white solid with identical spectroscopic characteristics as the non-labeled compound.

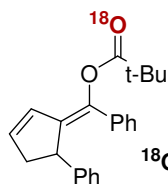

$^{18}\text{O-10}$  was obtained from the previously obtained isotopically labelled propargylic ester by  $\text{Ph}_3\text{PAuSbF}_6$  catalyzed reaction in  $\text{CH}_3\text{NO}_2$  using the same procedure applied for the preparation of unlabelled **10**. This protocol affords pure, isotopically labelled  $^{18}\text{O-10}$  as a clear oil with identical spectroscopic characteristics as the non-labeled compound.

The position of isotopically labelled oxygen in the molecule was determined by combining two different experiments:

1. **IR:** Infrared spectroscopy of the unlabelled compound **10** showed a very intense peak at  $1745\text{ cm}^{-1}$ , which corresponds to the  $\text{C}=\text{O}$  stretch. For  $^{18}\text{O-10}$ , IR that peak disappeared while another one showed at  $1713\text{ cm}^{-1}$ , which is consistent with a  $\text{C}=\text{}^{18}\text{O}$  stretch.

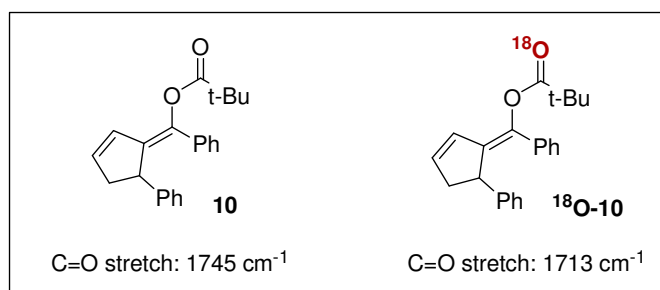

2. **Mass spectroscopy:** although both possible labelled compounds  $^{18}\text{O-10}$  must have the same mass, the fragments observed by ionization should be different. Thus, the relative intensity of the peaks observed by EI showed one main peak corresponding to the unlabeled enol-ketone (100:15). These results suggest that the labelled atom in compound  $^{18}\text{O-10}$  resides exclusively on the carbonyl group.

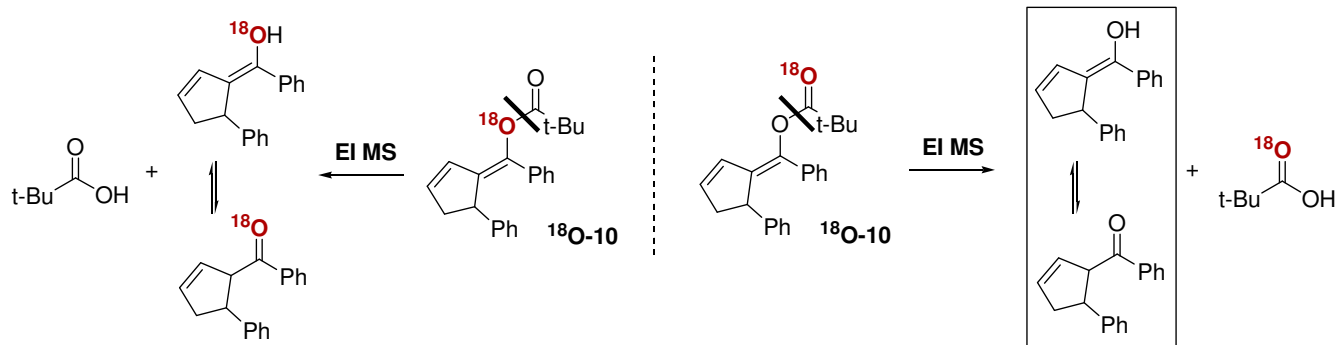

### 2.3.2. Cleavage of the pivaloate group

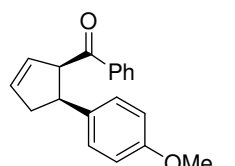

**40.** A solution of **16** (1 mmol, 278 mg) in Et<sub>2</sub>O (2 mL) was added dropwise and under vigorous stirring to a 0 °C suspension of LiAlH<sub>4</sub> (1.1 equiv.) in Et<sub>2</sub>O (3 mL). The solution was then stirred at room temperature until TLC showed complete consumption of the starting material (2 hours). The reaction mixture was then carefully quenched with saturated aqueous Na<sub>2</sub>SO<sub>4</sub> (2 mL), stirred at room temperature for 1 hour and filtered over a short pad of silica to remove the aluminum salts. After concentration, a 90:10 mixture of diastereomers was obtained which purified by flash chromatography (hexanes:AcOEt 25:1) to afford the desired ketone in 76% yield. <sup>1</sup>H NMR (300 MHz, CDCl<sub>3</sub>) δ 7.65 (d, *J* = 7.5 Hz, 2H), 7.42 (t, *J* = 7.5 Hz, 1H), 7.30 (d, *J* = 7.5 Hz, 2H), 6.87 (d, *J* = 8.7 Hz, 2H), 6.53 (d, *J* = 8.7 Hz, 2H), 6.17 (m, 1H), 5.96 (m, 1H), 4.89 (m, 1H), 3.93 (dt, *J* = 5.1 and 8.7 Hz, 1H), 3.65 (s, 3H), 2.95 (m, 1H), 2.73 (m, 1H). <sup>13</sup>C NMR (100 MHz, CDCl<sub>3</sub>) δ 200.8, 157.9, 137.9, 134.3, 133.5, 132.4, 129.6, 128.9, 128.1, 127.9, 113.2, 58.6, 55.1, 46.9, 41.3. HRMS (FAB) calc. for [C<sub>19</sub>H<sub>18</sub>O<sub>2</sub>]<sup>+</sup> ([M]<sup>+</sup>) 278.1307, found 278.1309. HPLC Chiralpak AD-H column (97:3 hexanes:isopropanol, 1 mL/min) t<sub>R</sub> 12.5 min (major), 16.1 min (minor): 32% *ee*.

### 2.3.3. *trans*-Disubstituted cyclopropyl propargyl esters and vinyl ethers

It was reasonable to predict analogous results regardless of the relative stereochemistry of cyclopropanes **9** and **12**. As expected, the reaction of *trans*-cyclopropyl substituted *trans*-**9** resulted in formation of **10** in similar yield (Supplementary Equation 1). In this case the *cis*-cyclopropyl isomer was never detected in the reaction mixture. Accordingly, the reaction of substrate *trans*-**12**, bearing a *trans* cyclopropyl group, resulted in formation of the *trans* cyclopropyl allene **41** (Supplementary Equation 2). Together these data indicate that *cis/trans* cyclopropyl isomerization is not kinetically feasible under these conditions.

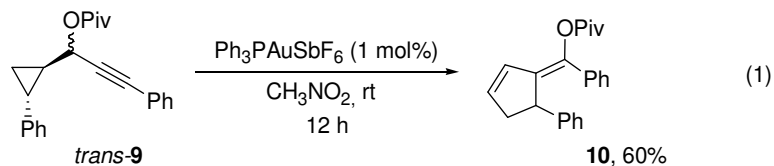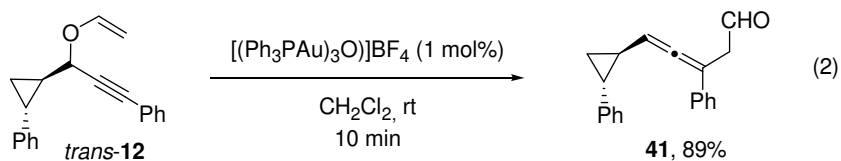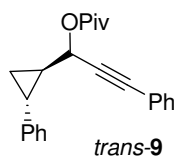

*trans*-9. Obtained as a 1:1 mixture of diastereomers about the propargylic position.  $^1\text{H}$  NMR (400 MHz,  $\text{CDCl}_3$ )  $\delta$  7.51-7.42 (m, 4H), 7.37-7.28 (m, 10H), 7.23-7.14 (m, 6H), 5.74 (d,  $J = 6.4$  Hz, 1H), 5.64 (d,  $J = 6.8$  Hz, 1H), 2.26 (quint,  $J = 4.4$  Hz, 1H), 2.18 (quint,  $J = 5.2$  Hz, 1H), 1.74-1.66 (m, 2H), 1.29 (s, 9H), 1.28 (s, 9H), 1.34-1.24 (m, 2H), 1.15-1.09 (m, 2H).  $^{13}\text{C}$  NMR (100 MHz,  $\text{CDCl}_3$ )  $\delta$  177.5, 141.6, 141.5, 131.9, 131.8, 128.6, 128.3, 128.2, 128.1, 126.5, 126.2, 125.9, 122.2, 122.1, 85.6, 85.4, 84.8, 84.5, 66.6, 66.5, 38.8, 27.1, 25.8, 25.1, 21.6, 20.3, 12.9, 12.3. HRMS (FAB) calc. for  $[\text{C}_{23}\text{H}_{24}\text{O}_2]^+$  ( $[\text{M}]^+$ ) 332.1776, found 332.1779.

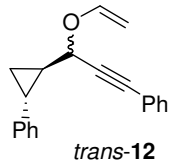

*trans*-12. Obtained as a 1:1 mixture of diastereomers about the propargylic position.  $^1\text{H}$  NMR (400 MHz,  $\text{CD}_2\text{Cl}_2$ )  $\delta$  7.54-7.48 (m, 4H), 7.44-7.37 (m, 6H), 7.34-7.30 (t,  $J = 7.3$  Hz, 4H), 7.24-7.17 (m, 6H), 6.62 (dd,  $J = 6.8$  and 14.0 Hz, 2H), 4.82 (d,  $J = 6.0$  Hz, 1H), 4.78 (d,  $J = 6.0$  Hz, 1H), 4.53 (dd,  $J = 1.6$  and 14.0 Hz, 2H), 4.23 (dd,  $J = 1.6$  and 6.8 Hz, 2H), 2.28 (q,  $J = 5.2$  Hz, 1H), 2.18 (q,  $J = 5.2$  Hz, 1H), 1.77-1.68 (m, 2H), 1.35 (dt,  $J = 5.2$  and 8.8 Hz, 1H), 1.28 (dt,  $J = 5.2$  and 9.0 Hz, 1H), 1.16-1.10 (m, 2H).  $^{13}\text{C}$  NMR (100 MHz,  $\text{CD}_2\text{Cl}_2$ )  $\delta$  150.4, 142.4, 142.3, 132.4, 132.3, 129.4, 129.3, 128.9, 128.8, 126.8, 126.6, 126.4, 122.7, 90.3, 90.2, 87.4, 87.3, 85.4, 85.3, 72.2, 72.1, 26.5, 26.3, 21.8, 20.7, 13.5, 13.0. HRMS (FAB) calc. for  $[\text{C}_{20}\text{H}_{18}\text{O}]^+$  ( $[\text{M}]^+$ ) 274.1358, found 274.1360.

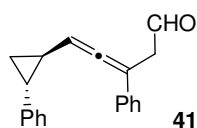

41. Obtained as a 1:1 mixture of allenes.  $^1\text{H}$  NMR (400 MHz,  $\text{CD}_2\text{Cl}_2$ )  $\delta$  9.81 (t,  $J = 2.4$  Hz, 1H), 9.78 (t,  $J = 2.4$  Hz, 1H), 7.42-7.38 (m, 8H), 7.33-7.28 (m, 6H), 7.22-7.20 (m, 2H), 7.15-7.12 (m, 4H), 5.76 (m, 2H), 3.49 (m, 4H), 2.06 (m, 2H), 1.71 (m, 2H), 1.29-1.23 (m, 2H), 1.17 (m, 2H).  $^{13}\text{C}$

NMR (100 MHz, CD<sub>2</sub>Cl<sub>2</sub>)  $\delta$  205.5, 200.3, 142.7, 136.2, 129.2, 129.1, 128.9, 127.8, 126.6, 126.3, 126.2, 126.1, 126.0, 100.6, 99.2, 45.6, 45.5, 26.2, 26.1, 22.3, 22.1, 17.4. HRMS (FAB) calc. for [C<sub>20</sub>H<sub>18</sub>O]<sup>+</sup> ([M]<sup>+</sup>) 274.1358, found 274.1361.

### 2.3.4. Ionization experiments and substitution at the ester moiety

A series of experiments employing Lewis acids AgSbF<sub>6</sub> and Zn(OTf)<sub>2</sub>, and Brønsted acids CF<sub>3</sub>CO<sub>2</sub>H and TfOH as catalysts in CH<sub>2</sub>Cl<sub>2</sub> were conducted, resulting in the exclusive formation of **11**. The fact that **10** was never observed when employing catalysts other than Au(I) suggests that the pentannulation product does not originate from Lewis or Brønsted acid catalysis.

#### Supplementary Scheme S2. Ionization of model propargylic ester **9**.

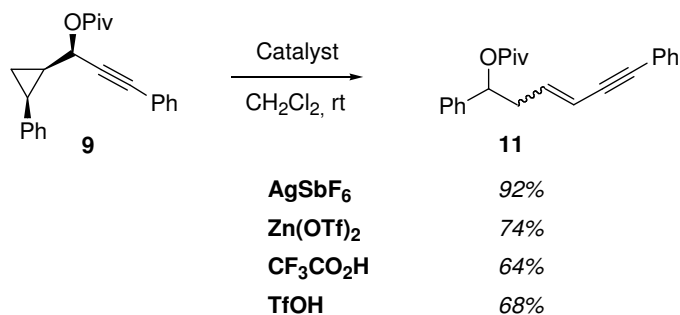

In trying to obtain more information on the initial [3,3]-rearrangement, we looked at the behavior of a series of esters with very different electronic properties. To that end, we investigated the Ph<sub>3</sub>PAuSbF<sub>6</sub> catalyzed reaction of substrates **42-44**, bearing 4-MeOC<sub>6</sub>H<sub>4</sub>, Ph and 4-NO<sub>2</sub>C<sub>6</sub>H<sub>4</sub> groups at the carboxylic carbon (Scheme 7). Again, it was observed that in all cases the corresponding cyclopentenes were obtained in good to excellent yields (58-97%). Interestingly, a longer reaction time was required in all cases (*ca.* 1 hour), which allowed us to observe a scrambling of stereocenters similar to that observed for pivalate protected substrate **9** (section 1.1). It was also observed that formation of the acyclic enyne is decreased or even prevented when using non-electron-rich migrating groups (4-NO<sub>2</sub>C<sub>6</sub>H<sub>4</sub>CO afforded the desired cyclopentene in 97% yield). These results can be easily accounted for by invoking an acid catalyzed ionization of the propargylic ester, a subsequent cyclopropyl ring opening to afford the thermodynamically more stable conjugated enyne, and a final nucleophilic attack of the carboxylate ion onto the benzylic position to afford **11**.<sup>7</sup> Thus, the utilization of ester partners with lower leaving group abilities reduces the participation of this competing pathway. The reaction of carbamate **45** resulted only in recovery of the unaltered starting material, indicating that in this case the initial [3,3]-rearrangement does not take place. This result suggests the possibility that the reactivity is

<sup>7</sup> Hiroi, K.; Kato, F., *Tetrahedron* **2001**, 57, 1543.

not triggered by a Au(I)-catalyzed activation of the cyclopropane.<sup>8</sup> Finally, the reaction of trichloroacetimidate<sup>9</sup> **46** afforded a complex mixture where the corresponding enyne (63%) along with decomposition products.

**Supplementary Scheme S1.** Substitution at propargylic oxygen.

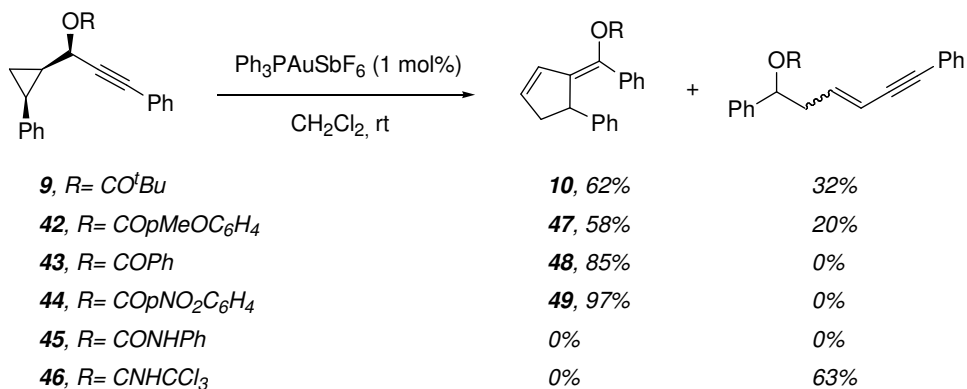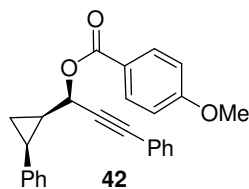

**42.** <sup>1</sup>H NMR (400 MHz, CDCl<sub>3</sub>) δ 7.95 (d, *J* = 8.8 Hz, 2H), 7.45-7.43 (m, 2H), 7.32-7.27 (m, 3H), 7.23-7.21 (m, 2H), 7.14-7.12 (m, 3H), 6.92 (d, *J* = 8.8 Hz, 2H), 4.85 (d, *J* = 10.4 Hz, 1H), 2.47 (q, *J* = 8.4 Hz, 1H), 1.99 (dq, *J* = 5.6 and 9.2 Hz, 1H), 1.29 (dt, *J* = 6.0 and 8.4 Hz, 1H), 1.20 (q, *J* = 5.6 Hz, 1H). <sup>13</sup>C NMR (100 MHz, CDCl<sub>3</sub>) δ 164.3, 163.2, 136.5, 131.9, 131.7, 129.2, 128.4, 128.1, 126.5, 122.4, 122.3, 113.4, 86.9, 84.5, 65.0, 55.35, 22.8, 22.0, 7.7. HRMS (FAB) calc. for [C<sub>26</sub>H<sub>22</sub>O<sub>3</sub>]<sup>+</sup> ([M]<sup>+</sup>) 382.1569, found 382.1571.

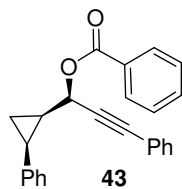

**43.** <sup>1</sup>H NMR (300 MHz, CDCl<sub>3</sub>) δ 8.04 (d, *J* = 7.2 Hz, 2H), 7.61 (t, *J* = 7.2 Hz, 1H), 7.51-7.47 (m, 4H), 7.37-7.32 (m, 3H), 7.28-7.20 (m, 2H), 7.18-7.16 (m, 3H), 4.92 (d, *J* = 10.0 Hz, 1H),

<sup>8</sup> It has been shown that Pt salts like Zeise's dimer can undergo C-C bond insertions into cyclopropanes in CHCl<sub>3</sub> at room temperature. See: Wiberg, K. B.; McCluski, J. V.; Schulte, G. K., *Tetrahedron Lett.* **1986**, 27, 3083. For Au(I) activation of cyclopropane in the gas phase, see: Chowdhury, A. K.; Wilkins, C. L., *J. Am. Chem. Soc.* **1987**, 109, 5536. For Au(I)-catalyzed expansion of alkynyl cyclopropanols, see: Markham, J. P.; Staben, S. T.; Toste, F. D. *J. Am. Chem. Soc.* **2005**, 127, 9708.

<sup>9</sup> (a) Overman, L. E., *J. Am. Chem. Soc.* **1974**, 96, 597. (b) Watson, M. P.; Overman, L. E.; Bergman, R. G., *J. Am. Chem. Soc.* **2007**, 129, 5031. (c) Kang, J.-E.; Kim, H.-K.; Lee, J.-W.; Shin, S. *Org. Lett.* **2006**, 8, 3537.

2.53 (q,  $J = 8.4$  Hz, 1H), 2.06 (dq,  $J = 5.2$  and  $8.4$  Hz, 1H), 1.34 (dt,  $J = 6.0$  and  $8.4$  Hz, 1H), 1.26 (q,  $J = 6.0$  Hz, 1H).  $^{13}\text{C}$  NMR (75 MHz,  $\text{CDCl}_3$ )  $\delta$  164.7, 136.6, 132.9, 132.0, 130.0, 129.8, 129.3, 128.6, 128.3, 128.2, 128.1, 126.3, 122.5, 86.7, 84.8, 65.5, 22.8, 22.1, 7.8. HRMS (FAB) calc. for  $[\text{C}_{25}\text{H}_{20}\text{O}_2]^+$  ( $[\text{M}]^+$ ) 352.1463, found 352.1469.

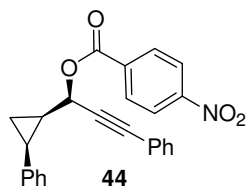

**44.**  $^1\text{H}$  NMR (400 MHz,  $\text{CDCl}_3$ )  $\delta$  8.30 (d,  $J = 8.8$  Hz, 2H), 8.12 (dd,  $J = 8.8$  Hz, 2H), 7.49-7.44 (m, 2H), 7.37-7.30 (m, 3H), 7.22-7.19 (m, 2H), 7.15-7.13 (m, 2H), 4.94 (d,  $J = 10.0$  Hz, 1H), 2.52 (q,  $J = 8.0$  Hz, 1H), 2.04 (dq,  $J = 5.2$  and  $8.4$  Hz, 1H), 1.35 (dt,  $J = 6.0$  and  $8.4$  Hz, 1H), 1.28 (q,  $J = 6.0$  Hz, 1H).  $^{13}\text{C}$  NMR (100 MHz,  $\text{CDCl}_3$ )  $\delta$  162.7, 150.4, 136.3, 135.3, 131.9, 130.7, 128.9, 128.7, 128.2, 128.1, 126.6, 123.3, 122.0, 85.8, 85.3, 66.5, 22.7, 21.9, 7.8. HRMS (FAB) calc. for  $[\text{C}_{25}\text{H}_{19}\text{NO}_4]^+$  ( $[\text{M}]^+$ ) 397.1314, found 397.1316.

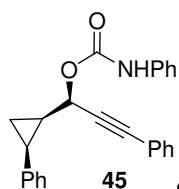

**45.**  $^1\text{H}$  NMR (400 MHz,  $\text{CD}_2\text{Cl}_2$ )  $\delta$  7.43-7.40 (m, 2H), 7.35-7.23 (m, 11H), 7.19-7.16 (m, 1H), 7.07-7.01 (m, 1H), 6.6 (s, 1H), 4.65 (d,  $J = 10.0$  Hz, 1H), 2.45 (q,  $J = 8.4$  Hz, 1H), 1.85 (dq,  $J = 5.6$  and  $8.8$  Hz, 1H), 1.25 (dt,  $J = 5.6$  and  $8.4$  Hz, 1H), 1.18 (q,  $J = 5.6$  Hz, 1H).  $^{13}\text{C}$  NMR (100 MHz,  $\text{CD}_2\text{Cl}_2$ )  $\delta$  151.7, 137.8, 136.9, 131.7, 129.2, 128.9, 128.6, 128.3, 128.1, 126.5, 123.3, 122.3, 120.0, 118.7, 86.8, 84.6, 65.6, 23.0, 7.6.

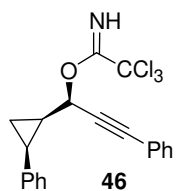

**46.**  $^1\text{H}$  NMR (400 MHz,  $\text{CD}_2\text{Cl}_2$ )  $\delta$  8.14 (s, 1H), 7.43-7.41 (m, 2H), 6.34-7.23 (m, 5H), 7.27-7.23 (m, 2H), 7.20-7.17 (m, 1H), 4.72 (d,  $J = 10.4$  Hz, 1H), 2.50 (q,  $J = 8.0$  Hz, 1H), 1.96 (m, 1H), 1.32-1.26 (m, 1H), 1.17 (q,  $J = 8.0$  Hz, 1H).  $^{13}\text{C}$  NMR (100 MHz,  $\text{CD}_2\text{Cl}_2$ )  $\delta$  160.5, 136.8, 131.7, 129.5, 128.7, 128.3, 128.1, 126.5, 122.2, 91.1, 85.8, 84.8, 69.6, 29.7, 22.9, 22.3, 7.5.

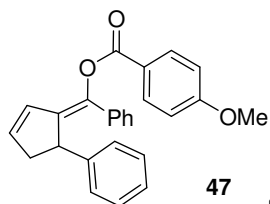

47

47. Obtained as a 70:30 mixture of olefins about the exocyclic double bond.  $^1\text{H}$  NMR (300 MHz,  $\text{CDCl}_3$ ) major diastereomer:  $\delta$  8.17 (d,  $J = 7.2$  Hz, 2H), 7.31-7.24 (m, 3H), 7.21-7.18 (m, 2H), 7.16-7.09 (m, 5H), 6.98 (d,  $J = 8.8$  Hz, 2H), 6.53 (dt,  $J = 2.0$  and 5.6 Hz, 1H), 6.10 (dt,  $J = 2.4$  and 5.2 Hz, 1H), 4.38 (dd,  $J = 1.6$  and 8.0 Hz, 1H), 3.89 (s, 3H), 3.24 (ddt,  $J = 2.4$ , 8.0 and 18.0 Hz, 1H), 2.54 (dd,  $J = 2.4$  and 18.0 Hz, 1H). Minor diastereomer (diagnostic peaks): 6.69 (m, 1H), 6.23 (m, 1H), 4.14 (dd,  $J = 2.4$  and 8.4 Hz, 1H), 3.85 (s, 3H), 3.17 (ddt,  $J = 2.5$ , 8.0 and 18.0 Hz, 1H), 2.51 (m, 1H).  $^{13}\text{C}$  NMR (75 MHz,  $\text{CDCl}_3$ )  $\delta$  165.0, 163.8, 145.6, 139.2, 138.7, 136.3, 135.1, 132.2, 132.1, 131.7, 131.5, 130.7, 130.1, 128.6, 128.4, 128.3, 128.2, 128.1, 127.9, 127.8, 127.5, 127.3, 127.2, 127.1, 127.0, 126.4, 125.9, 122.0, 113.8, 113.7, 55.5, 55.4, 46.3, 45.3, 44.6, 43.7. HRMS (FAB) calc. for  $[\text{C}_{26}\text{H}_{22}\text{O}_3]^+$  ( $[\text{M}]^+$ ) 382.1569, found 382.1574.

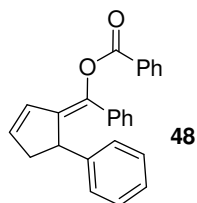

48

48. Obtained as a 70:30 mixture of olefins about the exocyclic double bond.  $^1\text{H}$  NMR (300 MHz,  $\text{CDCl}_3$ ) major diastereomer:  $\delta$  8.28 (d,  $J = 7.2$  Hz, 2H), 7.59-7.53 (m, 2H), 7.41-7.32 (m, 4H), 7.28-7.22 (m, 2H), 7.21-7.12 (m, 5H), 6.58 (dt,  $J = 2.0$  and 5.6 Hz, 1H), 6.16 (dt,  $J = 2.4$  and 5.2 Hz, 1H), 4.43 (dd,  $J = 1.6$  and 8.0 Hz, 1H), 3.24 (ddt,  $J = 2.4$ , 8.0 and 18.0 Hz, 1H), 2.54 (m, 1H). Minor diastereomer (diagnostic peaks):  $\delta$  6.74 (dt,  $J = 2.0$  and 5.2 Hz, 1H), 6.29 (dt,  $J = 2.4$  and 5.2 Hz, 1H), 4.20 (dd,  $J = 2.8$  and 8.4 Hz, 1H), 3.21 (ddt,  $J = 2.4$ , 8.4 and 18.4 Hz, 1H), 2.51 (m, 1H).  $^{13}\text{C}$  NMR (100 MHz,  $\text{CDCl}_3$ )  $\delta$  165.2, 164.3, 145.5, 145.4, 140.3, 139.9, 139.3, 138.9, 138.7, 136.5, 136.1, 134.9, 133.4, 133.0, 131.5, 130.6, 130.1, 130.0, 129.9, 129.7, 129.4, 128.6, 128.4, 128.3, 128.2, 128.1, 127.9, 127.8, 127.6, 127.4, 127.1, 127.0, 126.4, 126.0, 125.9, 46.4, 45.3, 44.6, 43.7. HRMS (FAB) calc. for  $[\text{C}_{25}\text{H}_{20}\text{O}_2]^+$  ( $[\text{M}]^+$ ) 352.1463, found 352.1469.

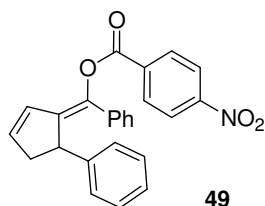

49

49. Obtained as a 67:33 mixture of olefins about the exocyclic double bond.  $^1\text{H}$  NMR (400 MHz,  $\text{CDCl}_3$ ) major diastereomer  $\delta$  8.36 (dd,  $J = 8.8$  and 12.8 Hz, 4H), 7.28-7.23 (m, 3H),



7.17-7.08 (m, 8H), 6.48 (m, 1H), 6.18 (dt,  $J = 2.4$  and  $5.2$ , 1H), 4.36 (d,  $J = 7.6$  Hz, 1H), 3.25 (ddt,  $J = 2.2$ ,  $8.0$  and  $18.0$  Hz, 1H), 2.55 (m, 1H). Minor diastereomer (diagnostic peaks)  $\delta$  6.67 (m, 1H), 6.27 (dt,  $J = 2.8$  and  $6.0$ , 1H), 4.16 (dd,  $J = 2.8$  and  $8.4$  Hz, 1H), 3.25 (m, 1H), 2.55 (m, 1H).  $^{13}\text{C}$  NMR (100 MHz,  $\text{CDCl}_3$ )  $\delta$  163.4, 162.3, 150.8, 150.5, 145.2, 145.0, 140.5, 139.8, 139.6, 139.5, 138.5, 137.5, 135.5, 135.0, 134.8, 134.5, 131.2, 130.9, 130.0, 129.8, 128.5, 128.4, 128.3, 128.2, 128.0, 127.9, 127.4, 127.2, 127.1, 127.0, 126.1, 126.0, 123.7, 123.2, 46.5, 45.2, 44.5, 43.9. HRMS (FAB) calc. for  $[\text{C}_{25}\text{H}_{19}\text{NO}_4]^+$  ( $[\text{M}]^+$ ) 397.1314, found 397.1316.

### 2.3.5. Cyclopentene formation: brief reaction scope

Sigmatropic rearrangements, traditionally effected under thermal conditions, usually require high reaction temperatures and often lead to complex reaction mixtures. As recently stated by Tantillo,<sup>10</sup> “transition metal promoted pericyclic reactions figure prominently in many complexity-creating synthetic transformations. The appeal of such reactions lies in the fact that by using appropriate metal promoters, reactions that are sluggish or even orbital-symmetry-forbidden in the absence of the metal can be achieved efficiently.”

Since the first report in 1959, the vinylcyclopropane-cyclopentene rearrangement<sup>11,12</sup> has attracted considerable attention due to its synthetic utility and its mechanistic implications. To complete our studies, we briefly examined the scope of this interesting Au(I)-catalysed rearrangement. We observed that the  $\text{Ph}_3\text{PAuSbF}_6$  catalysed the reaction of various propargylic cyclopropanes afforded cyclopentenes in excellent yields as mixtures of olefins about the exocyclic double bond (Supplementary Table 1). The use of pivaloate or acetate as the migrating group did not affect the reactivity of the system. In agreement with the results described above, yields were significantly improved by increasing the electron-donating ability of the aromatic ring directly attached to the cyclopropyl group. Turning to alkyne substitution, phenyl and methyl substituted alkynes afforded high yields, although methyl-substituted alkynes provided cleaner reaction mixtures in  $\text{CH}_3\text{NO}_2$  solvent. Also, in all cases the cyclopentenes were obtained regardless of the relative stereochemistry at the cyclopropyl and propargylic positions.

<sup>10</sup> Wang, S. C. & Tantillo, D. J. *J. Organomet. Chem.* **2006**, *691*, 4386-4392.

<sup>11</sup> Hudlicky, T., Kutchan, T. M. & Naqvi, S. M. *Organic Reactions* vol. 33, 247-335. Paquette, L. A., Ed. (Wiley, New York, 1985).

<sup>12</sup> Baldwin, J. E. *Chem. Rev.* **2003**, *103*, 1197-1212.

**Supplementary Table 1.** Au(I)-catalysed pentannulations, substrate scope.

| entry <sup>a</sup> | substrate                                                                          | product                                                                             | <i>E/Z</i> ratio | yield <sup>b</sup> |    |
|--------------------|------------------------------------------------------------------------------------|-------------------------------------------------------------------------------------|------------------|--------------------|----|
| 1                  | 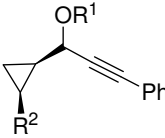  |   | <b>58</b>        | 75:25              | 97 |
| 2                  |   |   | <b>59</b>        | 90:10              | 95 |
| 3                  |   |   | <b>15</b>        | 75:25              | 97 |
| 4                  |   |   | <b>58</b>        | 75:25              | 97 |
| 5                  |   |   | <b>60</b>        | 50:50              | 94 |
| 6                  |   |   | <b>61</b>        | 50:50              | 95 |
| 7                  |   |   | <b>62</b>        | 50:50              | 95 |
| 8                  |  |  | <b>61</b>        | 50:50              | 95 |

<sup>a</sup> Conditions: 1% AuPPh<sub>3</sub>Cl, 1% AgSbF<sub>6</sub>, CH<sub>2</sub>Cl<sub>2</sub> or CH<sub>3</sub>NO<sub>2</sub>, rt, 10 min. to 12 h. <sup>b</sup> Isolated yield.

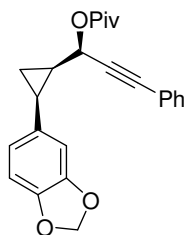

**50.** <sup>1</sup>H NMR (400 MHz, CD<sub>2</sub>Cl<sub>2</sub>) δ 7.44-7.41 (m, 2H), 7.34-7.30 (m, 3H), 6.75-6.68 (m, 3H), 5.92 (dd, *J* = 1.2 and 10.4 Hz, 2H), 4.57 (d, *J* = 10 Hz, 1H), 2.34 (q, *J* = 8.0 Hz, 1H), 1.79 (m, 1H), 1.21 (m, 1H), 1.16 (s, 9H), 1.03 (q, *J* = 6.0 Hz, 1H). <sup>13</sup>C NMR (100 MHz, CD<sub>2</sub>Cl<sub>2</sub>) δ 176.9, 148.0, 146.8, 132.3, 131.2, 129.1, 128.9, 123.0, 122.5, 110.5, 108.3, 101.7, 87.7, 84.3, 65.0, 39.0, 27.4, 23.1, 22.4, 8.2. HRMS (FAB) calc. for [C<sub>24</sub>H<sub>24</sub>O<sub>4</sub>]<sup>+</sup> ([M]<sup>+</sup>) 376.1675, found 376.1677.

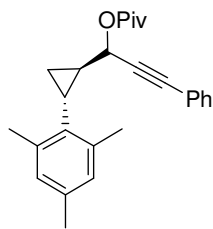

**51.** Obtained as a 1:1 mixture of diastereomers about the propargylic position. <sup>1</sup>H NMR (400 MHz, CDCl<sub>3</sub>) δ 7.50-7.48 (m, 4H), 7.37-7.34 (m, 6H), 6.87 (s, 4H), 5.79 (d, *J* = 6.4 Hz, 1H), 5.76

(d,  $J = 6.4$  Hz, 1H), 2.49 (s, 6H), 2.45 (s, 6H), 2.29 (s, 6H), 2.11-2.05 (m, 1H), 2.00-1.95 (m, 1H), 1.69-1.64 (m, 2H), 1.37-1.28 (m, 1H), 1.32 (s, 9H), 1.31 (s, 9H), 1.26-1.21 (m, 1H), 0.89-0.85 (m, 1H), 0.82-0.77 (m, 1H).  $^{13}\text{C}$  NMR (100 MHz,  $\text{CDCl}_3$ )  $\delta$  177.6, 138.5, 138.4, 135.8, 134.0, 133.9, 131.9, 131.8, 128.8, 128.7, 128.6, 128.3, 128.2, 122.3, 122.2, 85.7, 85.0, 84.6, 67.3, 67.0, 38.9, 27.1, 23.6, 23.4, 20.9, 20.8, 20.7, 18.3, 17.5, 12.9, 12.5. HRMS (FAB) calc. for  $[\text{C}_{26}\text{H}_{30}\text{O}_2]^+$  ( $[\text{M}]^+$ ) 374.2246, found 374.2250.

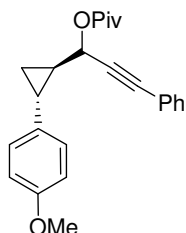

**52.** Obtained as a 1:1 mixture of diastereomers about the propargylic position.  $^1\text{H}$  NMR (400 MHz,  $\text{CDCl}_3$ )  $\delta$  7.50-7.46 (m, 4H), 7.36-7.32 (m, 6H), 7.11 (d,  $J = 8.4$  Hz, 2H), 7.07 (d,  $J = 8.8$  Hz, 2H), 6.86-6.83 (m, 4H), 5.71 (d,  $J = 6.4$  Hz, 1H), 5.59 (d,  $J = 7.2$  Hz, 1H), 3.81 (s, 6H), 2.21 (dt,  $J = 5.2$  and  $9.6$  Hz, 1H), 2.12 (dt,  $J = 4.8$  and  $9.2$  Hz, 1H), 1.65-1.57 (m, 2H), 1.28 (s, 18H), 1.22 (m, 2H), 1.03 (m, 2H).  $^{13}\text{C}$  NMR (100 MHz,  $\text{CDCl}_3$ )  $\delta$  177.5, 157.9, 146.1, 133.5, 133.4, 131.9, 131.8, 128.6, 128.2, 127.7, 127.4, 122.3, 122.2, 113.8, 113.7, 85.5, 85.3, 84.9, 84.6, 66.7, 66.6, 55.3, 38.8, 27.1, 26.5, 25.4, 24.7, 20.9, 19.6, 12.5, 11.9. HRMS (FAB) calc. for  $[\text{C}_{24}\text{H}_{26}\text{O}_3]^+$  ( $[\text{M}]^+$ ) 362.1882, found 362.1888.

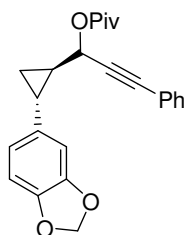

**53.** Obtained as a 1:1 mixture of diastereomers about the propargylic position.  $^1\text{H}$  NMR (400 MHz,  $\text{CDCl}_3$ )  $\delta$  7.54-7.49 (m, 4H), 7.39-7.34 (m, 6H), 6.79-6.77 (m, 2H), 6.73-6.66 (m, 4H), 5.96 (s, 4H), 5.76 (d,  $J = 6.4$  Hz, 1H), 5.64 (d,  $J = 6.8$  Hz, 1H), 2.24 (dt,  $J = 5.2$  and  $9.6$  Hz, 1H), 2.16 (dt,  $J = 4.4$  and  $8.8$  Hz, 1H), 1.65 (m, 2H), 1.33 (s, 18H), 1.25 (m, 2H), 1.06 (m, 2H).  $^{13}\text{C}$  NMR (100 MHz,  $\text{CDCl}_3$ )  $\delta$  177.4, 147.6, 147.5, 145.7, 135.3, 135.2, 131.8, 128.6, 128.4, 128.2, 122.1, 122.0, 119.7, 119.5, 108.0, 107.1, 106.8, 100.7, 85.6, 85.3, 84.8, 84.4, 66.6, 66.5, 38.7, 27.0, 26.9, 25.5, 24.7, 21.5, 20.0, 12.6, 11.9. HRMS (FAB) calc. for  $[\text{C}_{24}\text{H}_{24}\text{O}_4]^+$  ( $[\text{M}]^+$ ) 376.1675, found 376.1678.

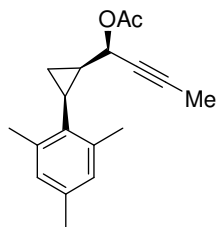

**54.**  $^1\text{H}$  NMR (400 MHz,  $\text{CDCl}_3$ )  $\delta$  6.75 (s, 2H), 4.51 (ddt,  $J = 1.6, 4.0$  and  $7.6$  Hz, 1H), 2.35 (s, 6H), 2.21 (s, 3H), 2.01 (q,  $J = 8.4$  Hz, 1H), 1.98 (s, 3H), 1.70 (m, 1H), 1.67 (d,  $J = 2.0$  Hz, 3H), 1.35 (dt,  $J = 5.6$  and  $8.8$  Hz, 1H), 1.16 (dt,  $J = 5.6$  and  $7.6$  Hz, 1H).  $^{13}\text{C}$  NMR (100 MHz,  $\text{CDCl}_3$ )  $\delta$  169.4, 135.6, 130.3, 128.8, 81.6, 76.0, 65.6, 20.8, 20.7, 20.4, 19.4, 11.4, 3.5. HRMS (FAB) calc. for  $[\text{C}_{18}\text{H}_{22}\text{O}_2]^+$  ( $[\text{M}]^+$ ) 270.1620, found 270.1617.

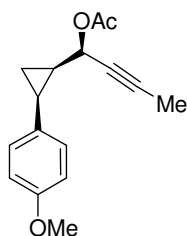

**55.**  $^1\text{H}$  NMR (400 MHz,  $\text{CDCl}_3$ )  $\delta$  7.13 (d,  $J = 8.4$  Hz, 2H), 6.80 (d,  $J = 8.4$  Hz, 2H), 4.32 (dd,  $J = 2.0$  and  $10.0$  Hz, 1H), 3.79 (s, 3H), 2.31 (q,  $J = 8.0$  Hz, 1H), 1.93 (s, 3H), 1.85 (d,  $J = 2.0$  Hz, 3H), 1.69-1.65 (m, 1H), 1.18 (dt,  $J = 5.6$  and  $8.4$  Hz, 1H), 0.99 (q,  $J = 5.6$  Hz, 1H).  $^{13}\text{C}$  NMR (100 MHz,  $\text{CDCl}_3$ )  $\delta$  169.2, 158.2, 130.0, 128.5, 113.4, 80.9, 76.8, 64.9, 56.7, 55.1, 42.8, 34.8, 22.6, 21.0, 20.6, 7.7, 3.7. HRMS (FAB) calc. for  $[\text{C}_{16}\text{H}_{18}\text{O}_3]^+$  ( $[\text{M}]^+$ ) 258.1256, found 258.1253.

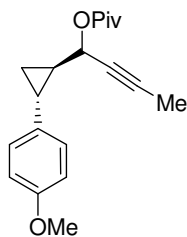

**56.** Obtained as a 1:1 mixture of diastereomers about the propargylic position.  $^1\text{H}$  NMR (300 MHz,  $\text{CDCl}_3$ )  $\delta$  7.05 (d,  $J = 8.6$  Hz, 2H), 7.01 (d,  $J = 8.6$  Hz, 2H), 6.81 (d,  $J = 8.6$  Hz, 2H), 6.79 (d,  $J = 8.6$  Hz, 2H), 5.41 (m, 1H), 5.29 (m, 1H), 3.78 (d,  $J = 1.6$  Hz, 6H), 2.07 (dt,  $J = 5.2$  and  $9.8$  Hz, 1H), 1.99 (dt,  $J = 5.2$  and  $9.8$  Hz, 1H), 1.87 (d,  $J = 2.0$  Hz, 3H), 1.85 (d,  $J = 2.0$  Hz, 3H), 1.47 (m, 2H), 1.22 (s, 6H), 1.08 (m, 2H), 0.93 (m, 2H).  $^{13}\text{C}$  NMR (75 MHz,  $\text{CDCl}_3$ )  $\delta$  177.6, 157.8, 133.7, 133.6, 127.6, 127.3, 113.7, 113.6, 81.9, 81.8, 75.1, 74.7, 66.8, 66.6, 55.2, 38.8, 27.1, 26.5, 25.5, 24.8, 20.8, 19.4, 12.5, 11.8, 3.6. HRMS (FAB) calc. for  $[\text{C}_{19}\text{H}_{24}\text{O}_3]^+$  ( $[\text{M}]^+$ ) 300.1725, found 300.1728.

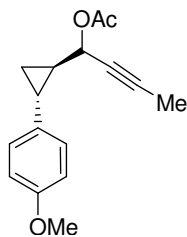

**57.** Obtained as a 1:1 mixture of diastereomers about the propargylic position.  $^1\text{H}$  NMR (400 MHz,  $\text{CDCl}_3$ )  $\delta$  7.04 (d,  $J = 8.4$  Hz, 2H), 7.01 (d,  $J = 8.4$  Hz, 2H), 6.83 (d,  $J = 8.4$  Hz, 2H), 6.81 (d,  $J = 8.4$  Hz, 2H), 5.39 (m, 2H), 3.78 (s, 3H), 3.77 (s, 3H), 2.10 (s, 3H), 2.09 (s, 3H), 2.10-2.05 (m, 1H), 2.01 (quint.,  $J = 7.2$  Hz, 1H), 1.52-1.48 (m, 2H), 1.16-1.04 (m, 2H), 0.98-0.88 (m, 2H).  $^{13}\text{C}$  NMR (100 MHz,  $\text{CDCl}_3$ )  $\delta$  170.2, 170.1, 157.8, 133.6, 133.5, 127.4, 127.2, 113.8, 113.7, 82.4, 82.3, 74.5, 74.4, 67.1, 55.2, 25.2, 24.9, 21.1, 20.9, 19.5, 13.0, 12.0, 3.6. HRMS (FAB) calc. for  $[\text{C}_{16}\text{H}_{18}\text{O}_3]^+$  ( $[\text{M}]^+$ ) 258.1256, found 258.1254.

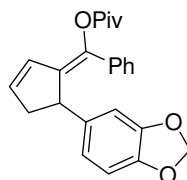

**58.** Obtained as a 75:25 mixture of olefins about the exocyclic double bond.  $^1\text{H}$  NMR (400 MHz,  $\text{CDCl}_3$ ) major diastereomer:  $\delta$  7.35-7.13 (m, 5H), 6.75-6.70 (m, 1H), 6.64-6.60 (m, 2H), 6.44 (m, 1H), 6.11 (m, 1H), 5.88 (s, 2H), 4.25 (d,  $J = 7.6$  Hz, 1H), 3.18 (dd,  $J = 8.0$  and 17.6 Hz, 1H), 2.49 (d,  $J = 18.0$  Hz, 1H), 1.38 (s, 9H). Minor diastereomer (diagnostic peaks): 4.11 (d,  $J = 6.8$  Hz, 1H), 3.15 (m, 1H), 2.39 (d,  $J = 18.4$  Hz, 1H), 1.05 (s, 9H).  $^{13}\text{C}$  NMR (100 MHz,  $\text{CDCl}_3$ )  $\delta$  176.8, 175.9, 147.6, 145.6, 145.5, 140.2, 139.7, 139.5, 138.7, 137.7, 136.4, 136.1, 135.2, 130.1, 128.2, 127.9, 127.8, 127.5, 127.4, 126.9, 120.2, 119.9, 107.9, 107.4, 107.3, 100.7, 45.4, 44.9, 44.5, 44.1, 39.0, 38.7, 31.6, 27.2, 26.9, 26.5, 25.3, 22.6, 14.1. HRMS (FAB) calc. for  $[\text{C}_{24}\text{H}_{24}\text{O}_4]^+$  ( $[\text{M}]^+$ ) 376.1675, found 376.11677.

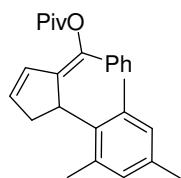

**59.** Obtained as a 90:10 mixture of olefins about the exocyclic double bond.  $^1\text{H}$  NMR (400 MHz,  $\text{CDCl}_3$ ) major diastereomer:  $\delta$  7.03-6.99 (m, 5H), 6.61 (s, 1H), 6.58 (s, 1H), 6.46 (m, 1H), 6.23 (m, 1H), 4.62 (dd,  $J = 4.4$  and 8.0 Hz, 1H), 3.14 (dd,  $J = 7.2$  and 18.0 Hz, 1H), 4.62 (d,  $J = 18.0$  Hz, 1H), 2.18 (s, 3H), 2.15 (s, 6H), 1.33 (s, 9H).  $^{13}\text{C}$  NMR (100 MHz,  $\text{CDCl}_3$ )  $\delta$  176.9, 138.3, 137.6, 136.7, 136.6, 135.7, 134.9, 134.8, 130.2, 130.1, 128.1, 128.0, 127.6, 127.4, 127.2, 127.0, 41.2, 41.0,

39.9, 38.9, 27.1, 26.5, 21.3, 20.9, 20.5, 20.1. HRMS (FAB) calc. for  $[C_{26}H_{30}O_2]^+$  ( $[M]^+$ ) 374.2246, found 374.2252.

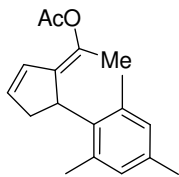

**60.** Obtained as a 1:1 mixture of olefins about the exocyclic double bond.  $^1H$  NMR (400 MHz,  $CDCl_3$ ):  $\delta$  6.87-6.80 (m, 4H), 6.32-6.29 (m, 2H), 6.11 (bs, 1H), 6.04 (bs, 1H), 4.48 (bs, 1H), 4.40 (bs, 1H), 3.06 (dd,  $J = 8.8$  and  $18.4$  Hz, 1H), 3.00 (dd,  $J = 8.8$  and  $18.4$  Hz, 1H), 2.51 (bs, 1H), 2.47 (bs, 1H), 2.39 (s, 3H), 2.38 (s, 3H), 2.26 (s, 3H), 2.24 (s, 3H), 2.16 (s, 6H), 2.09 (s, 3H), 1.99 (s, 3H), 1.46 (s, 3H), 1.40 (s, 3H).  $^{13}C$  NMR (100 MHz,  $CDCl_3$ )  $\delta$  169.4, 168.8, 137.4, 137.3, 137.1, 136.9, 136.1, 135.9, 135.7, 135.6, 135.5, 135.4, 135.2, 134.9, 134.7, 130.7, 130.4, 129.6, 129.1, 128.7, 128.6, 128.3, 40.8, 40.4, 40.0, 39.1, 39.0, 21.3, 21.1, 20.8, 20.7, 20.6, 19.6, 19.5, 19.4, 17.2, 16.2. HRMS (FAB) calc. for  $[C_{18}H_{22}O_2]^+$  ( $[M]^+$ ) 270.1620, found 270.1618.

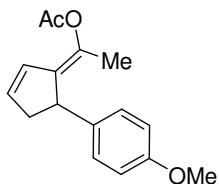

**61.** Obtained as a 1:1 mixture of olefins about the exocyclic double bond.  $^1H$  NMR (400 MHz,  $CDCl_3$ )  $\delta$  7.16-7.12 (m, 2H), 7.08-7.05 (m, 2H), 6.86-6.82 (m, 2H), 6.81-6.79 (m, 2H), 6.32-6.29 (m, 2H), 6.05 (dt,  $J = 2.8$  and  $5.6$  Hz, 1H), 5.93 (dt,  $J = 2.4$  and  $5.2$  Hz, 1H), 3.98 (d,  $J = 8.0$  Hz, 1H), 3.90 (d,  $J = 7.6$  Hz, 1H), 3.79 (s, 3H), 3.78 (s, 3H), 3.13 (dd,  $J = 8.8$  and  $18.0$  Hz, 1H), 3.06 (dd,  $J = 8.8$  and  $18.0$  Hz, 1H), 2.39 (d,  $J = 18.0$ , 2H), 2.17 (s, 3H), 2.00 (s, 3H), 1.75 (s, 3H), 1.64 (s, 3H).  $^{13}C$  NMR (100 MHz,  $CDCl_3$ )  $\delta$  169.4, 168.8, 157.8, 157.7, 138.2, 138.1, 137.9, 137.6, 137.5, 137.0, 135.6, 134.5, 129.2, 128.7, 128.6, 128.0, 127.8, 113.9, 113.8, 113.6, 55.1, 44.2, 44.1, 43.9, 43.4, 20.8, 20.4, 17.2, 17.1. HRMS (FAB) calc. for  $[C_{16}H_{18}O_3]^+$  ( $[M]^+$ ) 258.1256, found 258.1259.

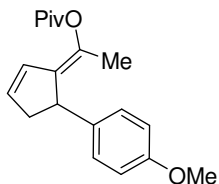

**62.** Obtained as a 1:1 mixture of olefins about the exocyclic double bond.  $^1H$  NMR (400 MHz,  $CDCl_3$ ):  $\delta$  7.19-7.15 (m, 2H), 7.06-7.03 (m, 2H), 6.86-6.82 (m, 2H), 6.80-6.68 (m, 2H), 6.32 (dt,  $J = 2.0$  and  $5.6$  Hz, 1H), 6.26 (dt,  $J = 2.0$  and  $5.6$  Hz, 1H), 5.96 (dt,  $J = 2.8$  and  $5.6$  Hz, 1H), 5.90 (dt,  $J = 2.8$  and  $5.6$  Hz, 1H), 3.98 (d,  $J = 9.6$  Hz, 1H), 3.98 (d,  $J = 10.6$  Hz, 1H), 3.78 (s, 3H), 3.76

(s, 3H), 3.12 (dd,  $J = 8.8$  and  $18.0$  Hz, 1H), 3.06 (dd,  $J = 8.8$  and  $18.0$  Hz, 1H), 2.38 (d,  $J = 18.0$  Hz, 1H), 2.28 (d,  $J = 18.0$  Hz, 1H), 2.01 (s, 3H), 1.61 (s, 3H), 1.29 (s, 9H), 0.94 (s, 9H).  $^{13}\text{C}$  NMR (100 MHz,  $\text{CDCl}_3$ )  $\delta$  177.0, 176.1, 157.7, 157.6, 138.4, 138.0, 137.9, 137.7, 136.6, 136.4, 134.8, 134.2, 129.5, 128.8, 128.5, 128.0, 127.8, 113.9, 113.8, 113.6, 55.2, 55.1, 44.2, 44.1, 43.6, 43.5, 38.9, 38.6, 27.1, 26.8, 17.0, 16.9. HRMS (FAB) calc. for  $[\text{C}_{19}\text{H}_{24}\text{O}_3]^+$  ( $[\text{M}]^+$ ) 300.1725, found 300.1727.

The synthetic utility of this Au(I)-catalysed cyclization is further highlighted in Supplementary Scheme 3. Starting from enyne **63**, the following four-step sequence afforded bicycle **66** as a single diastereomer in 67% overall yield: 1. Au(I)-catalysed oxidative rearrangement to furnish aldehyde **64**;<sup>12</sup> 2. addition of phenyl ethynyl magnesium bromide to the aldehyde; 3. 4- $\text{NO}_2\text{C}_6\text{H}_4\text{CO}$  protection of the resulting alcohol; 4. further Au(I)-catalysed pentannulation.

### Supplementary Scheme 3. Four-step sequence for the formation of bicycle **66**

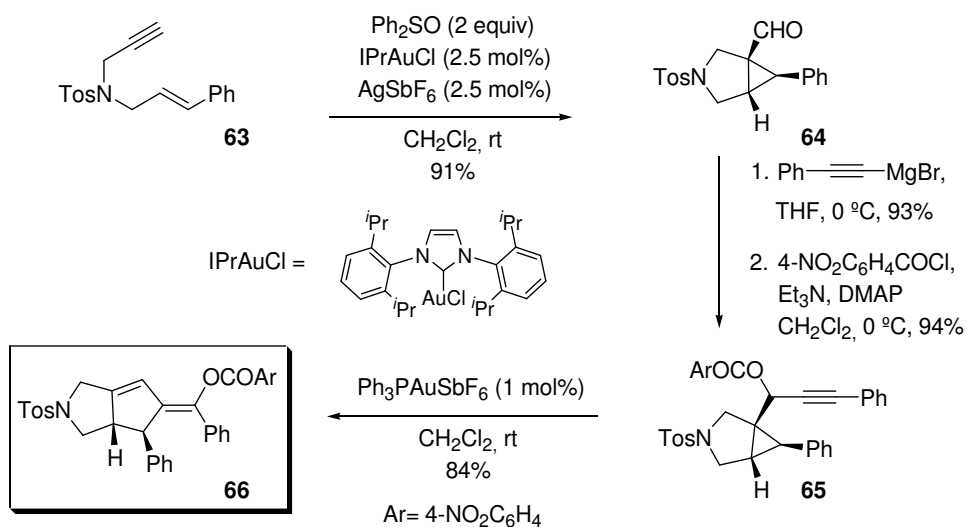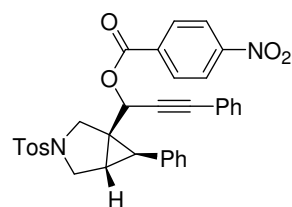

**65**.  $^1\text{H}$  NMR (500 MHz,  $\text{CDCl}_3$ )  $\delta$  8.30 (d,  $J = 8.7$  Hz, 2H), 8.09 (d,  $J = 8.7$  Hz, 2H), 7.80 (d,  $J = 8.1$  Hz, 2H), 7.36-7.30 (m, 3H), 7.29-7.22 (m, 2H), 7.20-7.10 (m, 5H), 7.09-7.03 (m, 2H), 5.17 (s, 1H), 4.05 (d,  $J = 9.3$  Hz, 1H), 3.78 (dd,  $J = 4.4$  and  $9.3$  Hz, 2H), 3.26 (dd,  $J = 4.4$  Hz, 1H), 2.76 (d,  $J = 4.4$  Hz, 1H), 2.38 (s, 3H), 2.21 (t,  $J = 4.1$  Hz, 1H).  $^{13}\text{C}$  NMR (100 MHz,  $\text{CDCl}_3$ )  $\delta$  160.4, 150.6, 143.7, 134.6, 134.2, 132.4, 131.8, 130.7, 129.7, 129.0, 128.5, 128.4, 128.1, 127.7, 127.2, 123.5, 121.2, 83.7, 83.5, 64.8, 50.9, 50.0, 37.3, 30.5, 25.3, 21.5. HRMS (FAB) calc. for  $[\text{C}_{34}\text{H}_{28}\text{N}_2\text{O}_6\text{S}]^+$  ( $[\text{M}]^+$ ) 592.1668, found 592.1673.

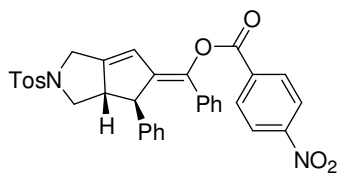

**66.**  $^1\text{H}$  NMR (400 MHz,  $\text{CDCl}_3$ )  $\delta$  8.34-8.28 (m, 4H), 7.60 (d,  $J = 8.2$  Hz, 2H), 7.33 (d,  $J = 8.2$  Hz, 2H), 7.10-6.94 (m, 10H), 6.15 (s, 1H), 4.14 (d,  $J = 4.3$  Hz, 1H), 4.07-4.04 (s, 1H), 3.90-3.84 (s, 2H), 3.42-3.32 (m, 1H), 2.84 (dd,  $J = 8.9$  and 10.1 Hz, 1H), 2.44 (s, 3H).  $^{13}\text{C}$  NMR (100 MHz,  $\text{CDCl}_3$ )  $\delta$  163.4, 150.9, 150.3, 143.8, 142.1, 141.4, 138.8, 134.7, 133.7, 133.5, 131.2, 129.9, 128.2, 128.1, 127.7, 127.6, 127.5, 127.4, 126.3, 123.8, 122.5, 60.6, 52.1, 51.4, 46.5, 21.6. HRMS (FAB) calc. for  $[\text{C}_{34}\text{H}_{28}\text{N}_2\text{O}_6\text{S}]^+$  ( $[\text{M}]^+$ ) 592.1668, found 592.1673.

**2.3.6. Terminal alkynes.** In the case of terminal alkynes, cyclopentene products (originated from a [3,3]-rearrangement) were not observed. A reversible [2,3]-rearrangement might also account for the observed loss of relative stereochemistry.<sup>13</sup> In agreement with this possibility, the reaction of a model substrate bearing a terminal alkyne led only to the scrambling of the stereocenters, and eventually to the thermodynamically more stable *trans* cyclopropanes as a 1:1 mixtures of diastereomers about the propargylic position. In agreement with our previously reported observations,<sup>14</sup> the Au(I)-catalyzed reaction of this substrate with  $\text{Ph}_2\text{SO}$  resulted in formation of a 1:1 mixture of diastereomeric aldehydes.

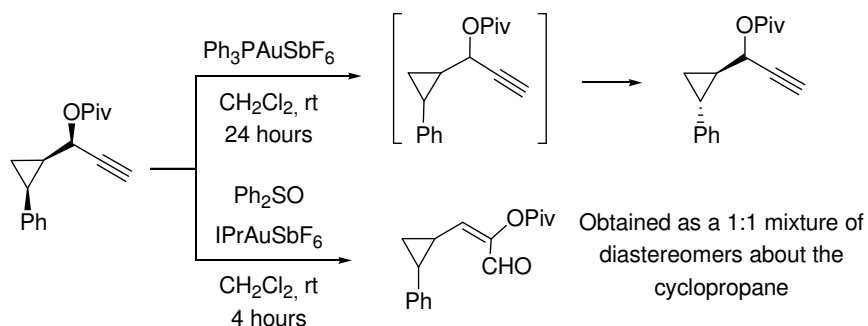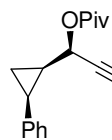

$^1\text{H}$  NMR (400 MHz,  $\text{CH}_2\text{Cl}_2$ )  $\delta$  7.32-7.26 (m, 2H), 7.24-7.20 (m, 3H), 4.32 (dd,  $J = 2.4$  and 10.8 Hz, 1H), 2.49 (d,  $J = 2.4$  Hz, 1H), 2.42 (q,  $J = 8.4$  Hz, 1H), 1.80 (m, 1H), 1.24 (m, 1H), 1.12-1.07 (m, 1H), 1.10 (s, 9H).  $^{13}\text{C}$  NMR (100 MHz,  $\text{CH}_2\text{Cl}_2$ )  $\delta$  176.5, 137.1, 129.4, 128.4, 126.8, 82.0, 72.4, 64.0, 38.6, 27.1, 23.0, 22.4, 7.6.  $^{13}\text{C}$  NMR (100 MHz,  $\text{CDCl}_3$ )  $\delta$  176.3, 136.4, 128.8, 128.1, 126.5, 81.5, 72.3, 63.7, 38.3, 26.9, 22.6, 22.0, 7.5. HRMS (FAB) calc. for  $[\text{C}_{17}\text{H}_{20}\text{O}_2]^+$  ( $[\text{M}]^+$ ) 256.1463, found 256.1461.

<sup>13</sup> Soriano, E.; Marco-Contelles, J. *Chem. Eur. J.* **2008**, *14*, 6771.

<sup>14</sup> Witham, C. A.; Mauleón, P.; Shapiro, N. D.; Sherry, B. D.; Toste, F. D. *J. Am. Chem. Soc.* **2007**, *129*, 5838.



### Procedure for 1,6-enyne Oxidative Rearrangement Catalyzed by $I\text{PrAuCl}/\text{AgSbF}_6$ :

A 0.10 mmol sample of starting material was dissolved in 1.0 mL of  $\text{CH}_2\text{Cl}_2$  (0.1 M) in a scintillation vial. Two equivalents of diphenyl sulfoxide were added 2.5 mol % of premixed catalyst in 0.1 mL  $\text{CH}_2\text{Cl}_2$  was added. The vial was sealed and the reaction mixture was maintained room temperature for the specified time. Crude reaction mixtures were purified by flash chromatography (5% ethyl acetate/hexanes).

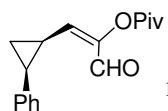

$^1\text{H}$  NMR (400 MHz,  $\text{CDCl}_3$ )  $\delta$  9.88 (s, 1H), 7.35-7.31 (m, 3H), 7.26-7.24 (m, 2H), 5.49 (d,  $J = 9.6$  Hz, 1H), 2.76-2.66 (m, 2H), 1.62 (dt,  $J = 5.2$  and 8.4 Hz, 1H), 1.30 (q,  $J = 5.6$  Hz, 1H), 1.21 (s, 9H).  $^{13}\text{C}$  NMR (100 MHz,  $\text{CDCl}_3$ )  $\delta$  182.6, 176.1, 145.3, 139.6, 136.6, 129.3, 128.5, 126.9, 38.7, 27.1, 25.6, 15.9, 14.4. HRMS (FAB) calc. for  $[\text{C}_{17}\text{H}_{20}\text{O}_3]^+$  ( $[\text{M}]^+$ ) 272.1412, found 272.1414.

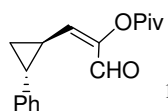

$^1\text{H}$  NMR (400 MHz,  $\text{CDCl}_3$ )  $\delta$  9.25 (s, 1H), 7.32 (t,  $J = 7.2$  Hz, 2H), 7.23 (t,  $J = 7.2$  Hz, 1H), 7.12 (d,  $J = 7.2$  Hz, 2H), 5.97 (d,  $J = 10.4$  Hz, 1H), 2.35 (ddd,  $J = 4.0, 6.4$  and 9.6 Hz, 1H), 1.99 (m, 1H), 1.64-1.59 (m, 1H), 1.43 (dt,  $J = 7.2$  and 12.8 Hz, 1H), 1.31 (s, 9H).  $^{13}\text{C}$  NMR (100 MHz,  $\text{CDCl}_3$ )  $\delta$  184.1, 175.7, 147.6, 144.8, 140.0, 128.6, 126.5, 126.1, 39.0, 27.5, 27.1, 21.9, 18.5. HRMS (FAB) calc. for  $[\text{C}_{17}\text{H}_{20}\text{O}_3]^+$  ( $[\text{M}]^+$ ) 272.1412, found 272.1415.

### 3. DFT calculations

**3.1. On the pentannulation process.** The variability observed in the relative rates of stereochemical scrambling and pentannulation suggests that the pentannulation mechanism circumvents whatever route which is responsible for *cis/trans* cyclopropane isomerization. With that in mind, a pathway was explored which involves a concerted ring expansion from the cyclopropyl allene directly to the cyclopentene. For ester model system **A** the transition state **Ats5** was located, corresponding to an activation barrier of 11.9 kcal/mol and connecting **A3** with cyclopentene-gold complex **A5** (Supplementary Figure S1). The reaction coordinate consists of a simultaneous cyclopropyl ring opening and bond formation between the benzylic carbon and that bound to the gold center; the triphenylphosphine-gold fragment then migrates to an  $\eta^2$   $\pi$ -bonding arrangement farther along the reaction coordinate.

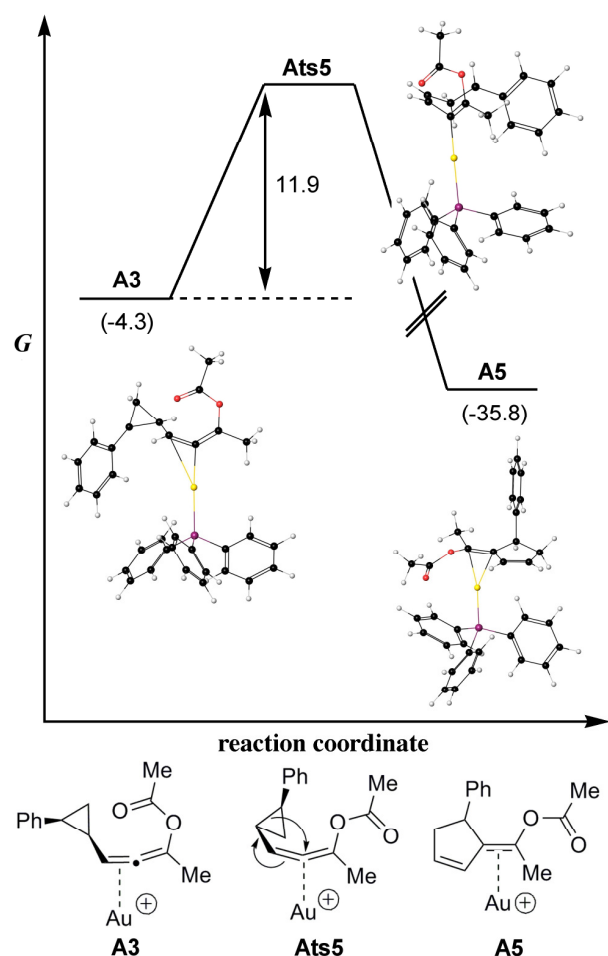

**Supplementary Figure S1.** Reaction coordinate diagram for pentannulation of acyl allene **A3** in  $\text{CH}_2\text{Cl}_2$ , Gibbs free energies ( $G_{\text{STP}}$ ) in kcal/mol. Values in parentheses relative to **A1**. Color scheme: C, black; H, gray; O, red; P, purple; Au, yellow.

The concerted cyclopentene-forming transition state **Bts5** was also located (Supplementary Figure S2), with an energy corresponding to  $\Delta G_{\text{STP}}^{\ddagger} \text{Bts5} = 13.4$  kcal/mol. This value is too low, as formation of cyclopentene **29** was observed experimentally only at slightly elevated temperature, but higher than that in system **A**. Given the known shortcomings of hybrid DFT in dealing with transition metal chemistry it is not at all surprising that the activation barrier has significant error with respect to experiment.<sup>15</sup> However, because systems **A** and **B** are very similar from a computational standpoint, the comparison between  $\Delta G_{\text{STP}}^{\ddagger} \text{A3s5}$  and  $\Delta G_{\text{STP}}^{\ddagger} \text{Bts5}$  should be valid. Therefore, our proposed pathway successfully predicts the lower rate of cyclopentene formation associated with the propargyl vinyl ethers.

<sup>15</sup> Schultz, N. E.; Zhao, Y.; Truhlar, D. G. *J. Phys. Chem. A* **2005**, *109*, 11127.

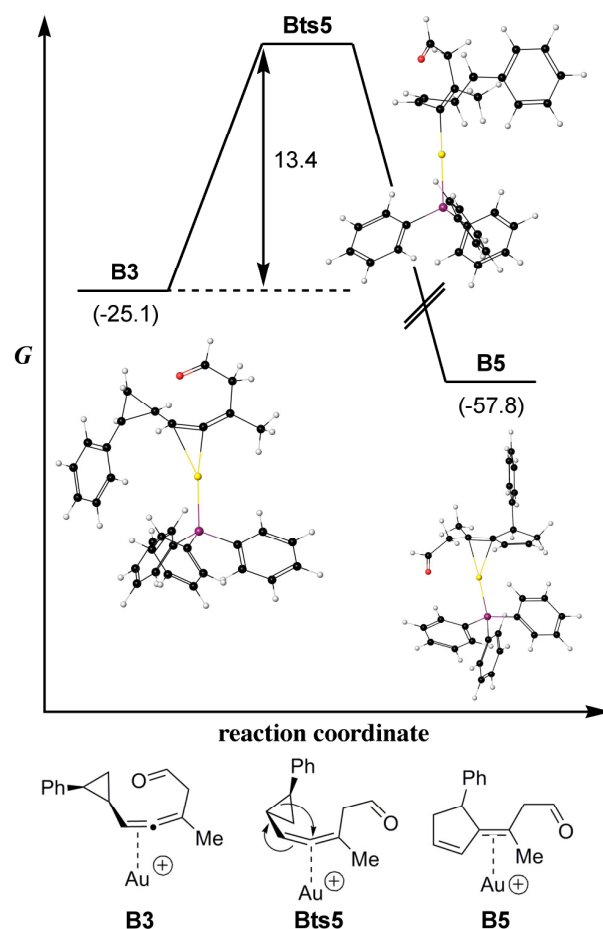

**Supplementary Figure S2.** Reaction coordinate diagram for pentannulation of formyl allene **B3** in  $\text{CH}_2\text{Cl}_2$ , Gibbs free energies ( $G_{\text{STP}}$ ) in kcal/mol. Values in parentheses relative to **B1**. Color scheme: C, black; H, gray; O, red; P, purple; Au, yellow.

It should be noted that the free allene arising from dissociation of **A3** was predicted to be more stable than the propargyl ester substrate by almost 5 kcal/mol, and the calculated substrate dissociation energies for **A1** and **A3** ( $\Delta G_{\text{STP}} = 6.6$  and 6.0 kcal/mol, respectively) were nearly equal. Therefore, given that cyclopentene formation was empirically shown to be slower than the cyclization, the calculations predict an eventual buildup of allene in solution which was not observed experimentally. These results indicate that the model chemistry introduces a non-physical bias towards the allene-like isomers, again highlighting deficiencies in the B3LYP functional. We felt it was necessary to use this overrated functional in order to maintain comparability with previous (and probably flawed) studies of others. However, results concerning strictly isodesmic processes such as **A3/A3<sub>trans</sub>** isomerization should be more reliable.<sup>16</sup>

<sup>16</sup> Petersson, G. A.; Malick, D. K.; Wilson, W. G.; Ochterski, J. W.; Montgomery, Jr., J. A.; Frisch, M. J. *J. Chem. Phys.* **1998**, *109*, 10570.

**3.2. *Cis/trans* cyclopropyl rearrangement.** As mentioned in the discussion, a plausible candidate mechanism for the *cis/trans* cyclopropyl rearrangement (shown in equation S1) was not satisfactorily modeled. The literature precedent for this process concerns carbocations that are not delocalized and so

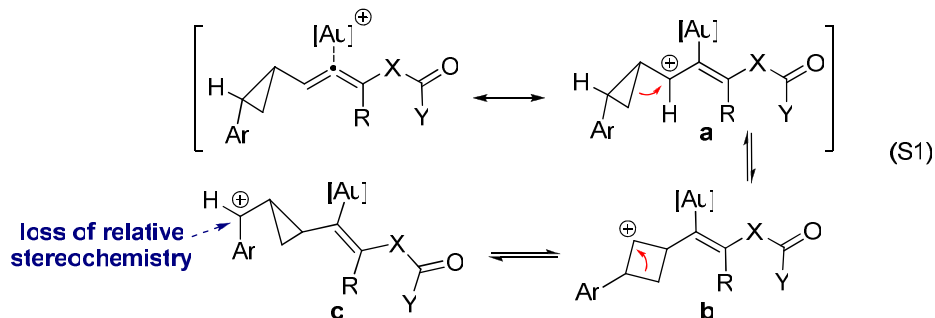

the localized, secondary carbocation in the cyclobutonium intermediate **b** is not greatly higher in energy than the cyclopropyl reactant. All attempts to locate the transition state proceeding from **a** to such a cyclobutonium species **b** in our model systems resulted in collapse to **a** or high-energy transition states with primary carbocationic character. Additionally, neither **b** nor **c** were located as minima.

An alternate mechanism was investigated which involves the heterolysis of a cyclopropyl carbon-carbon bond yielding an acyclic benzyl cation with a *trans* alkene  $\alpha$  to the metal-bound carbon, as depicted by **A(B)6** in equation S2. Stationary points were located that appear to be either the

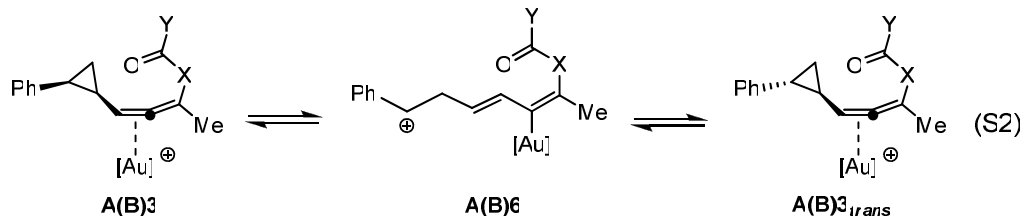

transition states between **A(B)3<sub>trans</sub>** and acyclic minima **A(B)6** or the transition states for a concerted rearrangement. These extrema exhibit imaginary modes  $\nu = -59 \text{ cm}^{-1}$  and  $\nu = -125 \text{ cm}^{-1}$  in **Ats6** and **Bts6**, respectively, and their energies correspond to activation barriers ( $\Delta G_{\text{STP}}^{\ddagger}$ , from the more stable *trans* cyclopropyl isomer) of 13.1 and 16.9 kcal/mol respectively. The structures of **Ats6** and **Bts6** are shown in Figure S3. Given the known tendency for DFT methods to underestimate barrier heights<sup>14</sup> (see above) these values are more or less reasonable and at least correctly predict that the rearrangement will be less facile for **B3<sub>trans</sub>** than for **A3<sub>trans</sub>**. Furthermore, the formation of the *trans* alkene in **A(B)6** precludes the direct cyclization to cyclopentene complex **A(B)5**, a condition which is necessary because that cyclization was shown experimentally to follow a distinct pathway.

<sup>14</sup> Schultz, N. E.; Zhao, Y.; Truhlar, D. G. *J. Phys. Chem. A* **2005**, *109*, 11127.

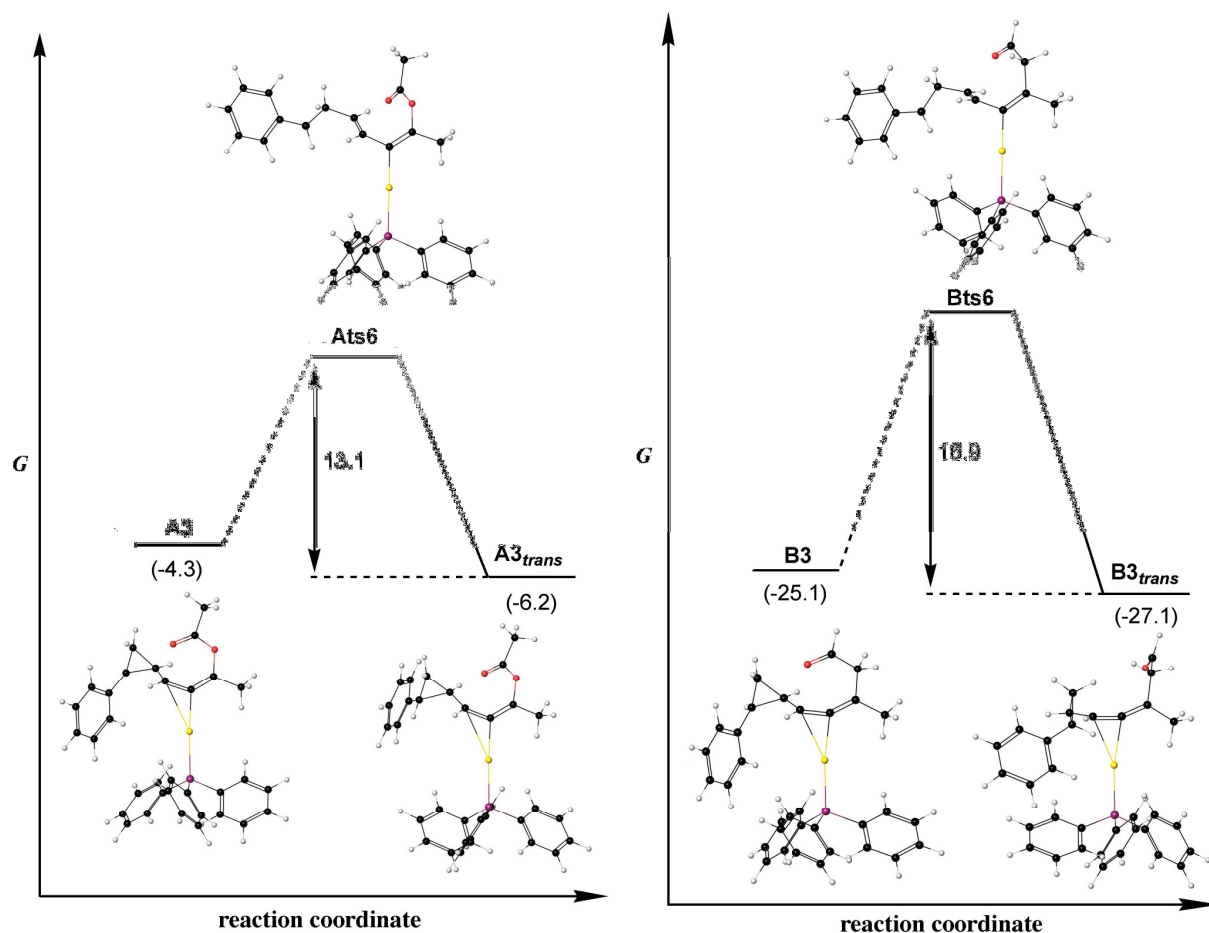

**Supplementary Figure S3.** Reaction coordinate diagrams for cyclopropyl ring opening in  $\text{CH}_2\text{Cl}_2$ , Gibbs free energies ( $G_{\text{STP}}$ ) in kcal/mol. Values in parentheses relative to **A1** (left) and **B1** (right). Color scheme: C, black; H, gray; O, red; P, purple; Au, yellow.

The problem with these structures is that while intrinsic reaction coordinate searches toward **A(B)3<sub>trans</sub>** resulted in the expected behavior, searches in the other direction halted at the first step (using a sufficiently large step size for the search to run) indicating that minima were reached. However, optimization of these “minima” never yielded the open configurations as stationary points and therefore it is unclear whether the potential energy wells for the acyclic cations **A(B)6** are simply very shallow or whether they do not exist. This ambiguity, taken with the lack of precedent for this mechanism of cyclopropyl rearrangement, prevents us from enthusiastically endorsing this mechanistic proposal.

**3.3. Computational methods.** All calculations were performed using Jaguar 6.5<sup>17</sup> with Maestro<sup>18</sup> as the graphical user interface. The popular hybrid DFT functional B3LYP<sup>19</sup> was used throughout. The valence double- $\zeta$ , 60-electron effective core potential LACVP<sup>2013</sup> basis set was employed for gold, while the remaining atoms were treated with Pople's 6-31G\*\* (e.g. 6-31G(d,p)) polarized basis set.<sup>21,22,23,24</sup> High-accuracy cutoffs were used with the default grid sizes for all calculations. The default geometry convergence scheme gave poor results in many cases, thus all reported structures were optimized using the GDIIS method.<sup>25</sup> Many stationary points were located on multiple occasions, which allowed us to estimate that the precision of the optimized total energies is about  $\pm 0.3$  kcal/mol. Analytic vibrational frequencies were calculated for all optimized structures, and their character as minima (0 imaginary frequencies) or transition states (1 imaginary frequency) were confirmed (imaginary modes lower than  $10\text{ cm}^{-1}$  were ignored). Intrinsic reaction coordinate calculations were performed on all transition state structures, confirming that each connects the expected reactant and product. Solvation calculations were carried out on the gas-phase structures using the Poisson-Boltzmann method,<sup>26,27</sup> with a dielectric constant and probe radius of 8.93 and 2.33 Å for dichloromethane, and 37.27 and 2.20 Å for nitromethane. NBO analyses employed NBO 5.0<sup>28</sup> as compiled with the current Jaguar release. Molecular graphics were generated in Maestro.

---

<sup>17</sup> Jaguar, version 6.5; Schrodinger, LLC: New York, 2005.

<sup>18</sup> Maestro, version 7.5; Schrodinger, LLC: New York, 2005.

<sup>19</sup> Stephens, P. J.; Devlin, F. J.; Chabalowski, C. F.; Frisch, M. J. *J. Phys. Chem.* **1994**, *98*, 11623.

<sup>20</sup> Hay, P. J.; Wadt, W. R. *J. Chem. Phys.* **1985**, *82*, 299.

<sup>21</sup> Ditchfield, R.; Hehre, W. J.; Pople, J. A. *J. Chem. Phys.* **1971**, *54*, 724.

<sup>22</sup> Hehre, W. J.; Ditchfield, R.; Pople, J. A. *J. Chem. Phys.* **1972**, *56*, 2257.

<sup>23</sup> Hariharan, P. C.; Pople, J. A. *Theor. Chim. Acta* **1973**, *28*, 213.

<sup>24</sup> Francl, M. M.; Pietro, W. J.; Hehre, W. J.; Binkley, J. S.; Gordon, M. S.; DeFrees, D. J.; Pople, J. A. *J. Chem. Phys.* **1982**, *77*, 3654.

<sup>25</sup> Császár, P.; Pulay, P. J.; *J. Mol. Struct.* **1984**, *114*, 31.

<sup>26</sup> Tannor, D. J.; Marten, B.; Murphy, R. B.; Friesner, R. A.; Sitkoff, D.; Nicholls, A.; Ringnalda, M. N.; Goddard, W. A., III; Honig, B. *J. Am. Chem. Soc.* **1994**, *116*, 11875.

<sup>27</sup> Marten, B.; Kim, K.; Cortis, C.; Friesner, R. A.; Murphy, R. B.; Ringnalda, M. N.; Sitkoff, D.; Honig, B. *J. Phys. Chem.* **1996**, *100*, 11775.

<sup>28</sup> Glendening, E. D.; Badenhoop, J. K.; Reed, A. E.; Carpenter, J. E.; Bohmann, J. A.; Morales, C. M.; Weinhold, F. (Theoretical Chemistry Institute, University of Wisconsin, Madison, WI, 2001); <http://www.chem.wisc.edu/~nbo5>.

### 3.4. Energies and coordinates of computed structures.

**Table S1.** Absolute energies and positional coordinates for **A1**.

Gas phase:

SCFE: -1903.25020387561 a.u.

ZPE: 330.435 kcal/mol

G<sub>STP</sub>: -1902.802388 a.u.

Dichloromethane:

SCFE: -1903.30434340797 a.u.

G<sub>STP</sub>: -1902.856527 a.u.

Nitromethane:

SCFE: -1903.31046752365 a.u.

G<sub>STP</sub>: -1902.862651 a.u.

|      |               |               |               |
|------|---------------|---------------|---------------|
| C1   | 11.8095216973 | 14.5985624484 | 0.7745666148  |
| O2   | 12.7541971679 | 14.0348711138 | 1.5586776130  |
| C3   | 12.4975191653 | 12.7420591686 | 2.1721662567  |
| C4   | 12.4926281153 | 11.6476364329 | 1.1683568736  |
| C5   | 12.7901502251 | 10.6448060251 | 0.5171389469  |
| H6   | 13.4079559014 | 12.5777394224 | 2.7574647296  |
| C7   | 13.3772270003 | 9.4588368910  | -0.1181134927 |
| H8   | 13.5245354597 | 9.6175536031  | -1.1901604197 |
| H9   | 14.3515966237 | 9.2603122208  | 0.3411160075  |
| H10  | 12.7403122056 | 8.5808599815  | 0.0196046838  |
| C11  | 11.3112698128 | 12.7352331689 | 3.1089665269  |
| C12  | 11.4380445777 | 13.4676819573 | 4.4241970808  |
| C13  | 11.4060805294 | 11.9641942494 | 4.4312170297  |
| H14  | 10.3438459312 | 12.7421535256 | 2.6196881303  |
| H15  | 12.3806504168 | 13.9676056872 | 4.6269750276  |
| H16  | 10.5700468068 | 14.0044305171 | 4.7933881025  |
| H17  | 10.4542609174 | 11.5248455069 | 4.7227579990  |
| C18  | 14.7311523529 | 9.3802795552  | 5.3911271078  |
| C19  | 14.8322184859 | 10.7487935665 | 5.6367787544  |
| C20  | 13.7655027065 | 11.6010510692 | 5.3382334586  |
| C21  | 12.5824139756 | 11.1003654172 | 4.7800051499  |
| C22  | 12.4899092741 | 9.7177975582  | 4.5462867631  |
| C23  | 13.5503350123 | 8.8659999826  | 4.8486025303  |
| H24  | 15.5573630323 | 8.7178926455  | 5.6316836147  |
| H25  | 15.7379546819 | 11.1580194201 | 6.0751644737  |
| H26  | 13.8527038688 | 12.6582744054 | 5.5701141460  |
| H27  | 11.5689776860 | 9.3088447261  | 4.1357508905  |
| H28  | 13.4529131277 | 7.7985128134  | 4.6699799699  |
| O29  | 10.7632958191 | 14.0494433419 | 0.4789136122  |
| Au30 | 10.6313233623 | 11.2862096947 | -0.2315935777 |
| P31  | 8.6048602334  | 11.1699038287 | -1.4052132841 |
| C32  | 5.1457448939  | 12.9647229644 | 1.0848046080  |
| C33  | 6.3816096280  | 13.6134403484 | 1.0153275774  |

|     |               |               |               |
|-----|---------------|---------------|---------------|
| C34 | 7.4266232103  | 13.0615035552 | 0.2756757634  |
| C35 | 7.2310553873  | 11.8498202433 | -0.4095297471 |
| C36 | 5.9907785855  | 11.1984591086 | -0.3379705411 |
| C37 | 4.9534073636  | 11.7589781996 | 0.4092035320  |
| H38 | 4.3365233642  | 13.3966049592 | 1.6661164637  |
| H39 | 6.5339180303  | 14.5512451357 | 1.5414721009  |
| H40 | 8.3864539257  | 13.5696527842 | 0.2310155979  |
| H41 | 5.8326044362  | 10.2591640448 | -0.8582471797 |
| H42 | 3.9953991302  | 11.2501462305 | 0.4624358880  |
| C43 | 7.4872212631  | 6.7810724156  | -2.3395049619 |
| C44 | 8.0181584645  | 7.1268593742  | -1.0941311840 |
| C45 | 8.3669168296  | 8.4488374531  | -0.8275070218 |
| C46 | 8.1756384468  | 9.4391578457  | -1.8052952378 |
| C47 | 7.6437187717  | 9.0879444486  | -3.0540617843 |
| C48 | 7.3024645805  | 7.7600572192  | -3.3157675137 |
| H49 | 7.2217067341  | 5.7489244641  | -2.5483134841 |
| H50 | 8.1646250939  | 6.3660193154  | -0.3331358217 |
| H51 | 8.7859147845  | 8.7130703091  | 0.1404549342  |
| H52 | 7.4968396296  | 9.8423919980  | -3.8200899113 |
| H53 | 6.8931163554  | 7.4926045055  | -4.2853474986 |
| C54 | 8.7248909548  | 13.4177582009 | -5.4454111739 |
| C55 | 7.5554894244  | 13.4263309545 | -4.6832789444 |
| C56 | 7.5123161108  | 12.7697269134 | -3.4525634758 |
| C57 | 8.6486340378  | 12.0966744760 | -2.9781752100 |
| C58 | 9.8251530809  | 12.0975561524 | -3.7440329353 |
| C59 | 9.8593515697  | 12.7530517895 | -4.9736623575 |
| H60 | 8.7542047753  | 13.9314227093 | -6.4015726800 |
| H61 | 6.6732381355  | 13.9467495314 | -5.0439308085 |
| H62 | 6.5996550155  | 12.7858619546 | -2.8649238594 |
| H63 | 10.7130109708 | 11.5876546171 | -3.3786455295 |
| H64 | 10.7727316690 | 12.7488861734 | -5.5609098320 |
| C65 | 12.2284332328 | 15.9718839275 | 0.3232946072  |
| H66 | 11.4593101646 | 16.3940114249 | -0.3226133092 |
| H67 | 12.3837956655 | 16.6177875606 | 1.1927225808  |
| H68 | 13.1802408872 | 15.9148707951 | -0.2132051654 |

**Table S2.** Absolute energies and positional coordinates for **Ats1**.

Gas phase:

SCFE: -1903.24013951360 a.u.

ZPE: 330.266 kcal/mol

G<sub>STP</sub>: -1902.789419 a.u.

Imaginary frequencies: -144, -9 cm<sup>-1</sup>

Dichloromethane:

SCFE: -1903.29523160693 a.u.

G<sub>STP</sub>: -1902.844511 a.u.

Nitromethane:

SCFE: -1903.30157949274 a.u.



G<sub>STP</sub>: -1902.850859 a.u.

|      |               |               |               |
|------|---------------|---------------|---------------|
| C1   | 11.1039522632 | 14.9445934128 | 4.2091921166  |
| O2   | 11.9026006470 | 14.5520592155 | 3.2128463497  |
| C3   | 11.8088436417 | 13.1966510461 | 2.6693323152  |
| C4   | 10.3728472715 | 12.8192573423 | 2.3844197014  |
| C5   | 9.3421272373  | 12.9935231260 | 3.0945485202  |
| H6   | 12.3739955798 | 13.2807620491 | 1.7419672532  |
| C7   | 7.9907743829  | 13.0787255551 | 3.6243063434  |
| H8   | 7.3348299214  | 12.4451007650 | 3.0165763597  |
| H9   | 7.9596224225  | 12.7165852337 | 4.6558546464  |
| H10  | 7.6171038236  | 14.1059372638 | 3.5941121771  |
| C11  | 12.4628365677 | 12.1932037241 | 3.5945449312  |
| C12  | 13.9304966081 | 12.3449249234 | 3.9132419306  |
| C13  | 13.4932448701 | 11.1919016405 | 3.0551620521  |
| H14  | 11.8145780595 | 11.8288337706 | 4.3850902054  |
| H15  | 14.4560472143 | 13.1713357514 | 3.4441208812  |
| H16  | 14.2531471495 | 12.1414703636 | 4.9294540770  |
| H17  | 13.4417347099 | 10.2311911946 | 3.5633191973  |
| C18  | 14.4763875688 | 10.6688066658 | -1.1166936425 |
| C19  | 15.0283848156 | 11.7355304545 | -0.4090761253 |
| C20  | 14.7162549833 | 11.9250607390 | 0.9391421656  |
| C21  | 13.8343772759 | 11.0608048814 | 1.6009749946  |
| C22  | 13.2791245960 | 9.9939571766  | 0.8735397538  |
| C23  | 13.6010529572 | 9.7938401876  | -0.4682709227 |
| H24  | 14.7379369575 | 10.5091651697 | -2.1589592516 |
| H25  | 15.7223397835 | 12.4128846114 | -0.8986436958 |
| H26  | 15.1913489226 | 12.7374960010 | 1.4802564839  |
| H27  | 12.6068602966 | 9.3008467664  | 1.3743376530  |
| H28  | 13.1750331229 | 8.9502989954  | -1.0041876835 |
| O29  | 10.2259289838 | 14.2384997131 | 4.6996498744  |
| Au30 | 9.7512140903  | 11.7779031371 | 0.6190138893  |
| P31  | 9.0334530475  | 10.7276208212 | -1.3675140350 |
| C32  | 4.4149591691  | 10.8730150814 | -1.6459898916 |
| C33  | 5.1420161603  | 12.0106886977 | -1.2864287685 |
| C34  | 6.5307114584  | 11.9500001369 | -1.1913348336 |
| C35  | 7.2054679386  | 10.7483901902 | -1.4664105798 |
| C36  | 6.4718869694  | 9.6097318599  | -1.8267467193 |
| C37  | 5.0798556417  | 9.6766856388  | -1.9137178605 |
| H38  | 3.3321408275  | 10.9203200836 | -1.7151556195 |
| H39  | 4.6267552183  | 12.9439110126 | -1.0788552619 |
| H40  | 7.0921694893  | 12.8377418117 | -0.9108243206 |
| H41  | 6.9797633199  | 8.6746905791  | -2.0385296854 |
| H42  | 4.5167238993  | 8.7909908245  | -2.1918205181 |
| C43  | 10.2360899135 | 6.2728432718  | -1.6345693922 |
| C44  | 9.8833276068  | 6.8373706712  | -0.4064465181 |
| C45  | 9.5463359299  | 8.1874145976  | -0.3304294990 |
| C46  | 9.5508776218  | 8.9799937741  | -1.4892928430 |
| C47  | 9.9076232622  | 8.4102542400  | -2.7204297688 |
| C48  | 10.2502129137 | 7.0590403422  | -2.7874922947 |

|     |               |               |               |
|-----|---------------|---------------|---------------|
| H49 | 10.5029590222 | 5.2217003158  | -1.6915528142 |
| H50 | 9.8747313052  | 6.2273179015  | 0.4919148779  |
| H51 | 9.2782054822  | 8.6260929242  | 0.6275495498  |
| H52 | 9.9211447504  | 9.0160577388  | -3.6211209568 |
| H53 | 10.5273350477 | 6.6219251793  | -3.7421955848 |
| C54 | 10.6644114001 | 12.8772491542 | -5.1216317437 |
| C55 | 9.3342931547  | 12.4577981864 | -5.0952617923 |
| C56 | 8.8236523051  | 11.8142421340 | -3.9672841374 |
| C57 | 9.6506997861  | 11.5886013141 | -2.8572539057 |
| C58 | 10.9884728243 | 12.0156817228 | -2.8849450430 |
| C59 | 11.4904898253 | 12.6541730982 | -4.0173942932 |
| H60 | 11.0568563967 | 13.3810533283 | -6.0002292510 |
| H61 | 8.6899325848  | 12.6324761437 | -5.9518212939 |
| H62 | 7.7866487673  | 11.4944889528 | -3.9527844072 |
| H63 | 11.6371530207 | 11.8455748096 | -2.0290068974 |
| H64 | 12.5251689282 | 12.9834599535 | -4.0354020370 |
| C65 | 11.3887111304 | 16.3552597411 | 4.6439395906  |
| H66 | 10.7641156517 | 16.6074053605 | 5.5000757801  |
| H67 | 12.4458484012 | 16.4642054767 | 4.9008316810  |
| H68 | 11.1807681137 | 17.0415474313 | 3.8166555448  |

**Table S3.** Absolute energies and positional coordinates for **A2**.

Gas phase:

SCFE: -1903.25903932863 a.u.

ZPE: 331.707 kcal/mol

G<sub>STP</sub>: -1902.806915 a.u.

Dichloromethane:

SCFE: -1903.31544268368 a.u.

G<sub>STP</sub>: -1902.863319 a.u.

Nitromethane:

SCFE: -1903.32175927098 a.u.

G<sub>STP</sub>: -1902.869635 a.u.

|     |               |               |               |
|-----|---------------|---------------|---------------|
| C1  | 11.8095216973 | 14.5985624484 | 0.7745666148  |
| O2  | 12.7541971679 | 14.0348711138 | 1.5586776130  |
| C3  | 12.4975191653 | 12.7420591686 | 2.1721662567  |
| C4  | 12.4926281153 | 11.6476364329 | 1.1683568736  |
| C5  | 12.7901502251 | 10.6448060251 | 0.5171389469  |
| H6  | 13.4079559014 | 12.5777394224 | 2.7574647296  |
| C7  | 13.3772270003 | 9.4588368910  | -0.1181134927 |
| H8  | 13.5245354597 | 9.6175536031  | -1.1901604197 |
| H9  | 14.3515966237 | 9.2603122208  | 0.3411160075  |
| H10 | 12.7403122056 | 8.5808599815  | 0.0196046838  |
| C11 | 11.3112698128 | 12.7352331689 | 3.1089665269  |
| C12 | 11.4380445777 | 13.4676819573 | 4.4241970808  |
| C13 | 11.4060805294 | 11.9641942494 | 4.4312170297  |
| H14 | 10.3438459312 | 12.7421535256 | 2.6196881303  |

|      |               |               |               |
|------|---------------|---------------|---------------|
| H15  | 12.3806504168 | 13.9676056872 | 4.6269750276  |
| H16  | 10.5700468068 | 14.0044305171 | 4.7933881025  |
| H17  | 10.4542609174 | 11.5248455069 | 4.7227579990  |
| C18  | 14.7311523529 | 9.3802795552  | 5.3911271078  |
| C19  | 14.8322184859 | 10.7487935665 | 5.6367787544  |
| C20  | 13.7655027065 | 11.6010510692 | 5.3382334586  |
| C21  | 12.5824139756 | 11.1003654172 | 4.7800051499  |
| C22  | 12.4899092741 | 9.7177975582  | 4.5462867631  |
| C23  | 13.5503350123 | 8.8659999826  | 4.8486025303  |
| H24  | 15.5573630323 | 8.7178926455  | 5.6316836147  |
| H25  | 15.7379546819 | 11.1580194201 | 6.0751644737  |
| H26  | 13.8527038688 | 12.6582744054 | 5.5701141460  |
| H27  | 11.5689776860 | 9.3088447261  | 4.1357508905  |
| H28  | 13.4529131277 | 7.7985128134  | 4.6699799699  |
| O29  | 10.7632958191 | 14.0494433419 | 0.4789136122  |
| Au30 | 10.6313233623 | 11.2862096947 | -0.2315935777 |
| P31  | 8.6048602334  | 11.1699038287 | -1.4052132841 |
| C32  | 5.1457448939  | 12.9647229644 | 1.0848046080  |
| C33  | 6.3816096280  | 13.6134403484 | 1.0153275774  |
| C34  | 7.4266232103  | 13.0615035552 | 0.2756757634  |
| C35  | 7.2310553873  | 11.8498202433 | -0.4095297471 |
| C36  | 5.9907785855  | 11.1984591086 | -0.3379705411 |
| C37  | 4.9534073636  | 11.7589781996 | 0.4092035320  |
| H38  | 4.3365233642  | 13.3966049592 | 1.6661164637  |
| H39  | 6.5339180303  | 14.5512451357 | 1.5414721009  |
| H40  | 8.3864539257  | 13.5696527842 | 0.2310155979  |
| H41  | 5.8326044362  | 10.2591640448 | -0.8582471797 |
| H42  | 3.9953991302  | 11.2501462305 | 0.4624358880  |
| C43  | 7.4872212631  | 6.7810724156  | -2.3395049619 |
| C44  | 8.0181584645  | 7.1268593742  | -1.0941311840 |
| C45  | 8.3669168296  | 8.4488374531  | -0.8275070218 |
| C46  | 8.1756384468  | 9.4391578457  | -1.8052952378 |
| C47  | 7.6437187717  | 9.0879444486  | -3.0540617843 |
| C48  | 7.3024645805  | 7.7600572192  | -3.3157675137 |
| H49  | 7.2217067341  | 5.7489244641  | -2.5483134841 |
| H50  | 8.1646250939  | 6.3660193154  | -0.3331358217 |
| H51  | 8.7859147845  | 8.7130703091  | 0.1404549342  |
| H52  | 7.4968396296  | 9.8423919980  | -3.8200899113 |
| H53  | 6.8931163554  | 7.4926045055  | -4.2853474986 |
| C54  | 8.7248909548  | 13.4177582009 | -5.4454111739 |
| C55  | 7.5554894244  | 13.4263309545 | -4.6832789444 |
| C56  | 7.5123161108  | 12.7697269134 | -3.4525634758 |
| C57  | 8.6486340378  | 12.0966744760 | -2.9781752100 |
| C58  | 9.8251530809  | 12.0975561524 | -3.7440329353 |
| C59  | 9.8593515697  | 12.7530517895 | -4.9736623575 |
| H60  | 8.7542047753  | 13.9314227093 | -6.4015726800 |
| H61  | 6.6732381355  | 13.9467495314 | -5.0439308085 |
| H62  | 6.5996550155  | 12.7858619546 | -2.8649238594 |
| H63  | 10.7130109708 | 11.5876546171 | -3.3786455295 |
| H64  | 10.7727316690 | 12.7488861734 | -5.5609098320 |

|     |               |               |               |
|-----|---------------|---------------|---------------|
| C65 | 12.2284332328 | 15.9718839275 | 0.3232946072  |
| H66 | 11.4593101646 | 16.3940114249 | -0.3226133092 |
| H67 | 12.3837956655 | 16.6177875606 | 1.1927225808  |
| H68 | 13.1802408872 | 15.9148707951 | -0.2132051654 |

**Table S4.** Absolute energies and positional coordinates for **Ats2**.

Gas phase:

SCFE: -1903.25456429383 a.u.

ZPE: 330.479 kcal/mol

G<sub>STP</sub>: -1902.804403 a.u.

Imaginary frequencies: -130 cm<sup>-1</sup>

Dichloromethane:

SCFE: -1903.30896264203 a.u.

G<sub>STP</sub>: -1902.858802 a.u.

Nitromethane:

SCFE: -1903.31542828759 a.u.

G<sub>STP</sub>: -1902.865267 a.u.

|     |               |               |               |
|-----|---------------|---------------|---------------|
| C1  | 11.2658082791 | 15.0101334546 | 4.2045548512  |
| O2  | 12.1610642348 | 14.3322012464 | 3.6930162275  |
| C3  | 11.5345589987 | 12.6775882020 | 2.7075669128  |
| C4  | 10.1964040978 | 13.0437126356 | 2.3522984436  |
| C5  | 9.4599806269  | 13.9905580638 | 2.9399388196  |
| H6  | 12.3106691242 | 12.8522375265 | 1.9650643378  |
| C7  | 8.0416481374  | 14.3848625822 | 2.6763759162  |
| H8  | 7.5901405234  | 13.7015474575 | 1.9556569206  |
| H9  | 7.4579497896  | 14.3556840049 | 3.6032965927  |
| H10 | 7.9830242781  | 15.4067073811 | 2.2837423977  |
| C11 | 11.8070033013 | 11.6326317718 | 3.6717553115  |
| C12 | 13.2210624200 | 11.4660917853 | 4.2323219064  |
| C13 | 12.7740338313 | 10.4539935709 | 3.2534533428  |
| H14 | 10.9777397417 | 11.3506606577 | 4.3126112789  |
| H15 | 13.9450327945 | 12.2149765033 | 3.9299803143  |
| H16 | 13.2771340813 | 11.1902557232 | 5.2804445613  |
| H17 | 12.4088300323 | 9.5190291111  | 3.6725009257  |
| C18 | 14.2696491940 | 9.9851505989  | -0.7572102212 |
| C19 | 13.1405471726 | 9.2835126644  | -0.3268640970 |
| C20 | 12.6690357224 | 9.4518449921  | 0.9735354613  |
| C21 | 13.3166461366 | 10.3207201422 | 1.8667353086  |
| C22 | 14.4537733797 | 11.0113707225 | 1.4271113585  |
| C23 | 14.9239342837 | 10.8471368578 | 0.1226454405  |
| H24 | 14.6442237204 | 9.8504539742  | -1.7678643023 |
| H25 | 12.6292658977 | 8.6016583365  | -1.0002181411 |
| H26 | 11.7919087547 | 8.9003280441  | 1.3025316646  |
| H27 | 14.9953166238 | 11.6633612863 | 2.1061003777  |
| H28 | 15.8114618299 | 11.3841444233 | -0.1993120165 |
| O29 | 9.9672936615  | 14.8461962203 | 3.9611835262  |

|      |               |               |               |
|------|---------------|---------------|---------------|
| Au30 | 9.5457391901  | 11.9508163013 | 0.6722921494  |
| P31  | 8.7419963883  | 10.9188135850 | -1.3181151714 |
| C32  | 4.1290244253  | 11.1886250139 | -1.5997130304 |
| C33  | 4.8766400519  | 12.2643014894 | -1.1152645841 |
| C34  | 6.2628465543  | 12.1638760344 | -1.0204659408 |
| C35  | 6.9152817685  | 10.9857456628 | -1.4199827259 |
| C36  | 6.1597786840  | 9.9090705012  | -1.9060983580 |
| C37  | 4.7707466873  | 10.0145039991 | -1.9926770691 |
| H38  | 3.0480606592  | 11.2658893617 | -1.6682942575 |
| H39  | 4.3794199510  | 13.1796211257 | -0.8082588963 |
| H40  | 6.8411268167  | 13.0040209714 | -0.6435954977 |
| H41  | 6.6497548822  | 8.9914875417  | -2.2154197173 |
| H42  | 4.1915860565  | 9.1763092700  | -2.3684875838 |
| C43  | 9.8121564767  | 6.4337541422  | -1.7724737684 |
| C44  | 9.4032879471  | 6.9464768815  | -0.5381153010 |
| C45  | 9.1034706980  | 8.3017642382  | -0.4077135683 |
| C46  | 9.2000620904  | 9.1562481933  | -1.5183615755 |
| C47  | 9.6106633451  | 8.6380070908  | -2.7551161185 |
| C48  | 9.9164310209  | 7.2807206279  | -2.8768014941 |
| H49  | 10.0490327602 | 5.3787906036  | -1.8718118604 |
| H50  | 9.3197892211  | 6.2906441680  | 0.3234486941  |
| H51  | 8.7891472990  | 8.6966244975  | 0.5554852474  |
| H52  | 9.6929933175  | 9.2884523360  | -3.6202938161 |
| H53  | 10.2337337532 | 6.8870258185  | -3.8380102683 |
| C54  | 10.3949379529 | 13.1507708274 | -5.0222757831 |
| C55  | 9.0594504138  | 12.7492284540 | -5.0041916066 |
| C56  | 8.5436809434  | 12.0748054973 | -3.8967151855 |
| C57  | 9.3694783381  | 11.8004882499 | -2.7963491346 |
| C58  | 10.7129006065 | 12.2108733322 | -2.8177136514 |
| C59  | 11.2215450159 | 12.8785435830 | -3.9300082201 |
| H60  | 10.7911234767 | 13.6796123937 | -5.8840751242 |
| H61  | 8.4141235847  | 12.9628108821 | -5.8510748597 |
| H62  | 7.5018656145  | 11.7702007465 | -3.8891058711 |
| H63  | 11.3582400211 | 12.0074312908 | -1.9665689194 |
| H64  | 12.2606116867 | 13.1940183620 | -3.9409892645 |
| C65  | 11.5378261274 | 16.1170613312 | 5.1784778122  |
| H66  | 11.1467188154 | 17.0597682829 | 4.7841341217  |
| H67  | 11.0138441597 | 15.9131490586 | 6.1177386954  |
| H68  | 12.6092327147 | 16.1989301324 | 5.3568382343  |

**Table S5.** Absolute energies and positional coordinates for **A3**.

Gas phase:

SCFE: -1903.25533874023 a.u.

ZPE: 330.065 kcal/mol

G<sub>STP</sub>: -1902.808021 a.u.

Dichloromethane:

SCFE: -1903.31076447770 a.u.

G<sub>STP</sub>: -1902.863447 a.u.

Nitromethane:

SCFE: -1903.31707108853 a.u.

G<sub>STP</sub>: -1902.869753 a.u.

|      |               |               |               |
|------|---------------|---------------|---------------|
| C1   | 11.3938371205 | 15.1972088823 | 3.8328096604  |
| O2   | 12.2824044936 | 14.7087291703 | 3.1667923694  |
| C3   | 11.4599547572 | 12.5108952508 | 2.3938149937  |
| C4   | 10.2081530236 | 13.0709993568 | 2.1115999930  |
| C5   | 9.5308450334  | 14.0651772074 | 2.7018316838  |
| H6   | 12.2516834094 | 12.6204809349 | 1.6527981015  |
| C7   | 8.1289178375  | 14.5095470778 | 2.4182032213  |
| H8   | 7.6297284300  | 13.8067575221 | 1.7487044618  |
| H9   | 7.5612914473  | 14.5761617327 | 3.3526810345  |
| H10  | 8.1198963828  | 15.5048804888 | 1.9588692356  |
| C11  | 11.7313526877 | 11.6476924605 | 3.5002562250  |
| C12  | 13.1587866907 | 11.6863853360 | 4.1105285441  |
| C13  | 12.8013996164 | 10.4849407485 | 3.3474848253  |
| H14  | 10.9128957211 | 11.4515831238 | 4.1845552514  |
| H15  | 13.8315900772 | 12.4199304023 | 3.6799998772  |
| H16  | 13.1722800997 | 11.6440459482 | 5.1951179431  |
| H17  | 12.4743519519 | 9.6278799653  | 3.9330320651  |
| C18  | 14.4492755346 | 9.4254488871  | -0.4823000703 |
| C19  | 13.2420562346 | 8.8702471332  | -0.0494166427 |
| C20  | 12.7188542666 | 9.2233266682  | 1.1919224578  |
| C21  | 13.3896910931 | 10.1399948566 | 2.0174436259  |
| C22  | 14.6035921662 | 10.6831818429 | 1.5787645575  |
| C23  | 15.1289877961 | 10.3281060598 | 0.3347171608  |
| H24  | 14.8617140822 | 9.1471232179  | -1.4477260325 |
| H25  | 12.7091731949 | 8.1612027321  | -0.6764747406 |
| H26  | 11.7815748138 | 8.7855384110  | 1.5265513958  |
| H27  | 15.1567783380 | 11.3682714351 | 2.2146897974  |
| H28  | 16.0750884569 | 10.7516194226 | 0.0108704864  |
| O29  | 10.0677016350 | 14.8879210742 | 3.7012186719  |
| Au30 | 9.4817083847  | 12.0490614633 | 0.3910363661  |
| P31  | 8.5891364828  | 11.0322067394 | -1.5660711352 |
| C32  | 3.9696727514  | 10.7144310109 | -1.4137715158 |
| C33  | 4.6209616705  | 11.8404288172 | -0.9043034488 |
| C34  | 6.0120048717  | 11.9215812810 | -0.9433095810 |
| C35  | 6.7660889255  | 10.8767702141 | -1.5010467590 |
| C36  | 6.1072705955  | 9.7480223758  | -2.0118194841 |
| C37  | 4.7143853054  | 9.6715680167  | -1.9660275702 |
| H38  | 2.8864053578  | 10.6490335171 | -1.3765455414 |
| H39  | 4.0455627137  | 12.6530575151 | -0.4709770212 |
| H40  | 6.5128383338  | 12.7995574907 | -0.5432906801 |
| H41  | 6.6763193047  | 8.9286257464  | -2.4390232623 |
| H42  | 4.2129413141  | 8.7929533680  | -2.3608295413 |
| C43  | 10.0990667106 | 6.6948981349  | -2.1515334009 |
| C44  | 9.6388907645  | 7.1270213770  | -0.9038270450 |

|     |               |               |               |
|-----|---------------|---------------|---------------|
| C45 | 9.2113847304  | 8.4427665646  | -0.7350645933 |
| C46 | 9.2269402338  | 9.3338026214  | -1.8210952770 |
| C47 | 9.6912969650  | 8.8975151815  | -3.0694368095 |
| C48 | 10.1280910897 | 7.5804925269  | -3.2290882577 |
| H49 | 10.4335151473 | 5.6695832593  | -2.2815514679 |
| H50 | 9.6136231452  | 6.4385761423  | -0.0640278122 |
| H51 | 8.8559987648  | 8.7758878450  | 0.2371336301  |
| H52 | 9.7107078143  | 9.5777503886  | -3.9147773712 |
| H53 | 10.4864177571 | 7.2473148155  | -4.1987209863 |
| C54 | 9.7046592959  | 13.4100898488 | -5.3796401195 |
| C55 | 8.4480350921  | 12.8103056647 | -5.2856513485 |
| C56 | 8.0906564291  | 12.1000252465 | -4.1386566931 |
| C57 | 8.9960428254  | 11.9879982114 | -3.0733371302 |
| C58 | 10.2557975215 | 12.6003976472 | -3.1684543798 |
| C59 | 10.6077999271 | 13.3035396811 | -4.3197520168 |
| H60 | 9.9774378718  | 13.9637009135 | -6.2730099112 |
| H61 | 7.7410654825  | 12.8956530215 | -6.1051689714 |
| H62 | 7.1101405621  | 11.6394813289 | -4.0743483695 |
| H63 | 10.9589048806 | 12.5293950855 | -2.3426621745 |
| H64 | 11.5838599247 | 13.7740491803 | -4.3861025001 |
| C65 | 11.5795084421 | 16.2402495166 | 4.8993254848  |
| H66 | 10.9055085775 | 16.0602086044 | 5.7399690322  |
| H67 | 12.6190898175 | 16.2459392474 | 5.2268658372  |
| H68 | 11.3338443038 | 17.2245096109 | 4.4841282823  |

**Table S6.** Absolute energies and positional coordinates for  $\mathbf{A3}_{trans}$ .

Gas phase:

SCFE: -1903.25670156081 a.u.

ZPE: 330.017 kcal/mol

$G_{STP}$ : -1902.809704 a.u.

Dichloromethane:

SCFE: -1903.31335376907 a.u.

$G_{STP}$ : -1902.866357 a.u.

Nitromethane:

SCFE: -1903.32012549938 a.u.

$G_{STP}$ : -1902.873129 a.u.

|     |               |              |               |
|-----|---------------|--------------|---------------|
| C1  | 1.7345556704  | 5.2963522591 | 0.5934062952  |
| O2  | 1.1478188912  | 4.7898984864 | 1.5231825288  |
| C3  | -0.2833428143 | 3.0184641952 | 0.5185387029  |
| C4  | 0.7960789516  | 2.5840430912 | -0.2660740312 |
| C5  | 1.7561135950  | 3.3150290674 | -0.8630223894 |
| H6  | -0.3783759674 | 2.6072294613 | 1.5245241494  |
| C7  | 2.7873547375  | 2.8366085283 | -1.8377013383 |
| H8  | 2.5708554520  | 1.8182916671 | -2.1649947628 |
| H9  | 2.8105719782  | 3.4993216000 | -2.7096764595 |
| H10 | 3.7872029650  | 2.8575589390 | -1.3883378170 |

|      |               |               |               |
|------|---------------|---------------|---------------|
| C11  | -1.3690406535 | 3.8131199755  | 0.0513695018  |
| C12  | -2.2450705423 | 4.5767741086  | 1.0545425504  |
| C13  | -2.8517840748 | 3.3624588737  | 0.4913904588  |
| H14  | -1.3112657668 | 4.2018870286  | -0.9598463715 |
| H15  | -1.9137409618 | 4.5642559807  | 2.0877469889  |
| H16  | -2.5838728553 | 5.5469884080  | 0.7062025030  |
| H17  | -2.8433108796 | 2.4870146326  | 1.1349062330  |
| O18  | 1.9745940247  | 4.6711989562  | -0.6076022452 |
| Au19 | 0.7490280683  | 0.4697820316  | -0.3856097770 |
| P20  | 0.7987501681  | -1.9001484854 | -0.5531471753 |
| C21  | 5.1074006440  | -3.4988039574 | -1.1202664467 |
| C22  | 4.8568503151  | -2.4129689386 | -0.2774369453 |
| C23  | 3.5585768427  | -1.9278534776 | -0.1281512289 |
| C24  | 2.4949469209  | -2.5341588802 | -0.8164967395 |
| C25  | 2.7513285846  | -3.6223843431 | -1.6641335287 |
| C26  | 4.0547605795  | -4.0990910809 | -1.8128409647 |
| H27  | 6.1200484677  | -3.8722365291 | -1.2395781502 |
| H28  | 5.6732812691  | -1.9405949022 | 0.2607724104  |
| H29  | 3.3709003643  | -1.0790185074 | 0.5248789603  |
| H30  | 1.9405253933  | -4.0952312079 | -2.2092857759 |
| H31  | 4.2458538871  | -4.9404103983 | -2.4724830269 |
| C32  | -1.7080864465 | -3.4535339139 | -4.1175250322 |
| C33  | -0.9824403068 | -2.2649506407 | -4.2248379535 |
| C34  | -0.2453605331 | -1.7970324764 | -3.1387796490 |
| C35  | -0.2208174628 | -2.5230386471 | -1.9373827895 |
| C36  | -0.9545366651 | -3.7142047848 | -1.8328796151 |
| C37  | -1.6950459111 | -4.1741563394 | -2.9226450542 |
| H38  | -2.2865694659 | -3.8145099338 | -4.9628543938 |
| H39  | -0.9953856686 | -1.6993273442 | -5.1517798955 |
| H40  | 0.3096362927  | -0.8660293606 | -3.2228819509 |
| H41  | -0.9524471367 | -4.2791261471 | -0.9059002893 |
| H42  | -2.2625564389 | -5.0960316876 | -2.8354587361 |
| C43  | -0.8977880192 | -3.8946478959 | 3.2626719844  |
| C44  | 0.2638299931  | -4.4050404318 | 2.6833001738  |
| C45  | 0.7967797723  | -3.8135739268 | 1.5364503546  |
| C46  | 0.1639163005  | -2.7008847607 | 0.9646379551  |
| C47  | -1.0010384872 | -2.1862517813 | 1.5568415439  |
| C48  | -1.5308995733 | -2.7851379818 | 2.6972032888  |
| H49  | -1.3078664268 | -4.3569228784 | 4.1556659830  |
| H50  | 0.7597574983  | -5.2651829614 | 3.1231877086  |
| H51  | 1.7019138927  | -4.2165610812 | 1.0933523198  |
| H52  | -1.4930905232 | -1.3196510317 | 1.1219997312  |
| H53  | -2.4337605553 | -2.3842847146 | 3.1484981349  |
| C54  | 2.3140958239  | 6.6830662087  | 0.5701226508  |
| H55  | 1.9849995230  | 7.2137169068  | -0.3279371680 |
| H56  | 2.0067780210  | 7.2223242788  | 1.4654596627  |
| H57  | 3.4065691395  | 6.6249841442  | 0.5313425309  |
| C58  | -5.8521683096 | 3.1465957504  | -2.5714737894 |
| C59  | -5.5425108763 | 2.0308485536  | -1.7931259033 |
| C60  | -4.5656597913 | 2.1205451952  | -0.8037072485 |



|     |               |              |               |
|-----|---------------|--------------|---------------|
| C61 | -3.8885930006 | 3.3276813785 | -0.5715925876 |
| C62 | -4.2100846548 | 4.4446218729 | -1.3584799119 |
| C63 | -5.1829707944 | 4.3527001308 | -2.3507970850 |
| H64 | -6.6129101259 | 3.0796600118 | -3.3434946041 |
| H65 | -6.0621701517 | 1.0911522390 | -1.9548310385 |
| H66 | -4.3292527416 | 1.2488157441 | -0.1982813416 |
| H67 | -3.7097367557 | 5.3957138227 | -1.1985615968 |
| H68 | -5.4240753689 | 5.2259420515 | -2.9497344390 |

**Table S7.** Absolute energies and positional coordinates for **Ats4**.

Gas phase:

SCFE: -1903.249364 a.u.

ZPE: 329.663 kcal/mol

G<sub>STP</sub>: -1902.801501 a.u.

Imaginary frequencies: -40 cm<sup>-1</sup>

Dichloromethane:

SCFE: -1903.308158 a.u.

G<sub>STP</sub>: -1902.860295 a.u.

|     |              |               |               |
|-----|--------------|---------------|---------------|
| C1  | 0.2789586818 | -0.1832312048 | -0.4619410715 |
| O2  | 0.4756202327 | 0.3299674480  | 0.6092629050  |
| C3  | 3.8673964990 | 0.0311535024  | -1.8876576578 |
| C4  | 3.5213758602 | -0.7101964618 | -0.7631482378 |
| C5  | 2.3825926256 | -1.2980306099 | -0.3687025880 |
| H6  | 3.8944005802 | -0.4881017114 | -2.8513416378 |
| C7  | 2.1735818196 | -2.2535178528 | 0.7633404976  |
| H8  | 3.1250390417 | -2.6204714584 | 1.1533119762  |
| H9  | 1.6206321597 | -1.7678574630 | 1.5731572362  |
| H10 | 1.5798604964 | -3.1057197583 | 0.4160349481  |
| C11 | 4.2475670759 | 1.4083927140  | -1.9037260158 |
| C12 | 3.8746869885 | 2.2190446172  | -3.1769014919 |
| C13 | 5.3033413791 | 1.9667208060  | -2.9500876558 |
| H14 | 4.2074642999 | 1.9369387998  | -0.9569550720 |
| H15 | 3.3555241349 | 1.6726571606  | -3.9578392018 |
| H16 | 3.4657693547 | 3.2034759491  | -2.9719057654 |
| H17 | 5.8503171700 | 2.7806682040  | -2.4783790823 |
| C18 | 7.8716535151 | -0.5488608337 | -5.3108857091 |
| C19 | 8.2727689230 | -0.0955013436 | -4.0515880723 |
| C20 | 7.4224237804 | 0.7076665962  | -3.2959641448 |
| C21 | 6.1564905417 | 1.0693970498  | -3.7849847645 |
| C22 | 5.7651924199 | 0.6145435725  | -5.0509958983 |
| C23 | 6.6186483440 | -0.1911207490 | -5.8076854936 |
| H24 | 8.5359592719 | -1.1699565264 | -5.9044993446 |
| H25 | 9.2506158134 | -0.3615439976 | -3.6606156641 |
| H26 | 7.7439068208 | 1.0636430964  | -2.3202333325 |
| H27 | 4.8065740765 | 0.9101473901  | -5.4678799598 |
| H28 | 6.3064969349 | -0.5286620306 | -6.7916263390 |
| O29 | 1.2246591132 | -0.9823441329 | -1.0894262847 |

|      |               |               |               |
|------|---------------|---------------|---------------|
| Au30 | 5.3208430402  | -0.9227177292 | 0.3802531009  |
| P31  | 7.2327803843  | -1.2143348668 | 1.7551182398  |
| C32  | 6.8014703515  | 0.5774651298  | 5.9939892847  |
| C33  | 5.6930991248  | 0.0276786951  | 5.3465491129  |
| C34  | 5.8192364179  | -0.4807034490 | 4.0546563269  |
| C35  | 7.0623192425  | -0.4465987472 | 3.4049944055  |
| C36  | 8.1725193031  | 0.1140056287  | 4.0564660061  |
| C37  | 8.0378523286  | 0.6226553280  | 5.3480699580  |
| H38  | 6.7001771885  | 0.9750058557  | 6.9995138184  |
| H39  | 4.7290945353  | -0.0013251532 | 5.8453299640  |
| H40  | 4.9526194007  | -0.9021228497 | 3.5517069252  |
| H41  | 9.1370002170  | 0.1549478006  | 3.5600652210  |
| H42  | 8.8996174384  | 1.0546620386  | 5.8482017562  |
| C43  | 10.8744659038 | 0.9116489666  | -0.1507123092 |
| C44  | 9.6762504150  | 1.6000257199  | 0.0654231480  |
| C45  | 8.5845458202  | 0.9392990004  | 0.6234854476  |
| C46  | 8.6891268358  | -0.4146310931 | 0.9854879893  |
| C47  | 9.8903415599  | -1.1009323797 | 0.7674297477  |
| C48  | 10.9778848918 | -0.4349192975 | 0.1971129784  |
| H49  | 11.7248885878 | 1.4266496386  | -0.5876734504 |
| H50  | 9.5960151606  | 2.6509007906  | -0.1981278333 |
| H51  | 7.6546422170  | 1.4775897911  | 0.7928621926  |
| H52  | 9.9821924274  | -2.1471739656 | 1.0419705898  |
| H53  | 11.9079340055 | -0.9713087723 | 0.0314226689  |
| C54  | 8.3839494741  | -5.6462486486 | 2.4163805953  |
| C55  | 8.6394461636  | -4.7077639491 | 3.4173892962  |
| C56  | 8.2810221355  | -3.3725772767 | 3.2348348027  |
| C57  | 7.6624024055  | -2.9681102604 | 2.0405746089  |
| C58  | 7.3995716165  | -3.9178419235 | 1.0405593707  |
| C59  | 7.7640299655  | -5.2506480084 | 1.2293126884  |
| H60  | 8.6616571660  | -6.6858989567 | 2.5632687258  |
| H61  | 9.1150652869  | -5.0142474573 | 4.3443137237  |
| H62  | 8.4780531221  | -2.6525990275 | 4.0223896023  |
| H63  | 6.9111546641  | -3.6160786282 | 0.1173513923  |
| H64  | 7.5584068488  | -5.9806145251 | 0.4520972182  |
| C65  | -0.9580589186 | -0.0678347184 | -1.3091069360 |
| H66  | -1.4324408472 | -1.0500625387 | -1.4080186087 |
| H67  | -1.6503562373 | 0.6304575342  | -0.8379711642 |
| H68  | -0.7013552969 | 0.2736034884  | -2.3167579498 |

**Table S8.** Absolute energies and positional coordinates for **A4**.

Gas phase:

SCFE: -1903.259784 a.u.

ZPE: 330.062 kcal/mol

G<sub>STP</sub>: -1902.812793 a.u.

Dichloromethane:

SCFE: -1903.316418 a.u.

G<sub>STP</sub>: -1902.869427 a.u.

|      |                  |                  |                  |
|------|------------------|------------------|------------------|
| C1   | 0.00000000000000 | 0.00000000000000 | 0.00000000000000 |
| O2   | 0.00000000000000 | 0.00000000000000 | 1.1957427644470  |
| C3   | 3.4199571848922  | 0.00000000000000 | -2.2432524958896 |
| C4   | 3.4959374886221  | -0.5020779049355 | -0.9489407598997 |
| C5   | 2.3134170928225  | -0.7834281808199 | -0.2613628182233 |
| H6   | 2.4757553118977  | -0.0973837026901 | -2.7829864144365 |
| C7   | 2.2424453568056  | -1.6368028873316 | 0.9614698149737  |
| H8   | 3.1514004919522  | -2.2347330472744 | 1.0390161057710  |
| H9   | 2.1399882430752  | -1.0199594885044 | 1.8605748643811  |
| H10  | 1.3626954974331  | -2.2870437778983 | 0.9312773666558  |
| C11  | 4.4958318427963  | 0.5932537006609  | -2.9749784823360 |
| C12  | 4.1693032764638  | 1.6046859069221  | -4.0950867836388 |
| C13  | 4.6765181666590  | 0.2949866815240  | -4.5315745933057 |
| H14  | 5.4301873560233  | 0.7305098021477  | -2.4404842177487 |
| H15  | 3.1178348738908  | 1.8331147590677  | -4.2363819529661 |
| H16  | 4.8238218419708  | 2.4696719521532  | -4.1373400084756 |
| H17  | 5.7425324153949  | 0.2521000388954  | -4.7458801721050 |
| C18  | 2.4786725202204  | -2.7457618277163 | -6.6300414795697 |
| C19  | 3.7000037044312  | -3.0390532854681 | -6.0179475771676 |
| C20  | 4.3919827952348  | -2.0439387826422 | -5.3340230675700 |
| C21  | 3.8755435005677  | -0.7407607230434 | -5.2464015278661 |
| C22  | 2.6549497154367  | -0.4539800665176 | -5.8704325447066 |
| C23  | 1.9606981759666  | -1.4525859201062 | -6.5561969146919 |
| H24  | 1.9394855299399  | -3.5192239366396 | -7.1690621066381 |
| H25  | 4.1136751081515  | -4.0414587774825 | -6.0790997944297 |
| H26  | 5.3463787295521  | -2.2728000976752 | -4.8655146273796 |
| H27  | 2.2531029704443  | 0.5552012389129  | -5.8484678863287 |
| H28  | 1.0195687731854  | -1.2148087790435 | -7.0434581054972 |
| O29  | 1.1716214941126  | -0.2550212258898 | -0.7606626214609 |
| Au30 | 5.3384610433437  | -0.8355283294014 | -0.0130105741883 |
| P31  | 7.4688488098420  | -1.1349904448856 | 1.0052809321587  |
| C32  | 7.7566151275358  | 0.9511013362156  | 5.1319651686449  |
| C33  | 6.6241987140592  | 0.2100640320664  | 4.7845028405994  |
| C34  | 6.5456492331185  | -0.4030847101912 | 3.5357410256664  |
| C35  | 7.6076567539912  | -0.2892752893330 | 2.6237292991095  |
| C36  | 8.7419019262951  | 0.4567882943924  | 2.9759453128349  |
| C37  | 8.8114025817094  | 1.0737650492174  | 4.2266021478961  |
| H38  | 7.8133815144544  | 1.4343102121643  | 6.1027346136895  |
| H39  | 5.7990307466303  | 0.1152924873218  | 5.4841666150743  |
| H40  | 5.6574702409757  | -0.9696927361373 | 3.2676291714880  |
| H41  | 9.5675150269451  | 0.5597832025900  | 2.2789450155855  |
| H42  | 9.6920780099981  | 1.6518637105722  | 4.4905885921441  |
| C43  | 10.6379380036466 | 0.8375278585989  | -1.7351103605584 |
| C44  | 9.4215548946664  | 1.4712224713038  | -1.4703394713687 |
| C45  | 8.4810120069618  | 0.8560681020979  | -0.6474996952844 |
| C46  | 8.7534037801747  | -0.3967708224874 | -0.0719815707040 |
| C47  | 9.9765281719713  | -1.0256236510962 | -0.3370821786649 |
| C48  | 10.9124790551502 | -0.4075077315301 | -1.1692853579192 |
| H49  | 11.3689396907989 | 1.3140193522222  | -2.3817567298416 |

|     |                  |                  |                  |
|-----|------------------|------------------|------------------|
| H50 | 9.2064996019189  | 2.4430724044857  | -1.9052889386619 |
| H51 | 7.5347483874767  | 1.3514454164445  | -0.4420341999895 |
| H52 | 10.1989713710248 | -1.9950455470363 | 0.0978344793539  |
| H53 | 11.8575895152428 | -0.9017907068841 | -1.3737582764206 |
| C54 | 8.6068347077490  | -5.5780505118924 | 1.6592448579838  |
| C55 | 9.0465547538154  | -4.6135535328271 | 2.5676071090196  |
| C56 | 8.7083201092555  | -3.2717177865136 | 2.3878231151037  |
| C57 | 7.9232905599426  | -2.8860854157331 | 1.2897320671856  |
| C58 | 7.4757798103938  | -3.8620639048617 | 0.3841011100641  |
| C59 | 7.8216950834498  | -5.2002104219510 | 0.5672145153619  |
| H60 | 8.8691817086304  | -6.6215785381624 | 1.8054096688056  |
| H61 | 9.6511949978871  | -4.9045673256122 | 3.4214775866919  |
| H62 | 9.0488537593677  | -2.5302188503663 | 3.1040460066227  |
| H63 | 6.8534792024314  | -3.5743003980682 | -0.4596497597349 |
| H64 | 7.4715878565260  | -5.9487646521622 | -0.1374374874017 |
| C65 | -1.1344924943571 | 0.3128407965869  | -0.9271362292284 |
| H66 | -1.2274620728994 | -0.4577020887888 | -1.6970576530700 |
| H67 | -2.0546264596595 | 0.3905757313563  | -0.3489363971324 |
| H68 | -0.9404054887175 | 1.2640432532418  | -1.4337242243136 |

**Table S9.** Absolute energies and positional coordinates for **Ats5**.

Gas phase:

SCFE: -1903.22997745206 a.u.

ZPE: 329.254 kcal/mol

G<sub>STP</sub>: -1902.780678 a.u.

Imaginary frequencies: -100 cm<sup>-1</sup>

Dichloromethane:

SCFE: -1903.29367075726 a.u.

G<sub>STP</sub>: -1902.844372 a.u.

Nitromethane:

SCFE: -1903.30170682964 a.u.

G<sub>STP</sub>: -1902.852408 a.u.

|     |               |               |              |
|-----|---------------|---------------|--------------|
| C1  | 9.9657250053  | 16.0600829676 | 4.3227070289 |
| O2  | 9.7773063976  | 16.5962173224 | 3.2578831370 |
| C3  | 11.5513105960 | 14.0107131284 | 2.3794411846 |
| C4  | 10.1652268007 | 13.5433045950 | 2.4466958675 |
| C5  | 9.3491484919  | 13.9234960290 | 3.4413432882 |
| H6  | 11.6845561039 | 15.0747875076 | 2.1697431151 |
| C7  | 7.8993105069  | 13.6062712787 | 3.6436768711 |
| H8  | 7.5354507268  | 12.9130560800 | 2.8829499487 |
| H9  | 7.7317089242  | 13.1715125039 | 4.6367250022 |
| H10 | 7.3013767967  | 14.5248565315 | 3.5890868989 |
| C11 | 12.6775195891 | 13.2702061929 | 2.4737234663 |
| C12 | 12.6900168743 | 11.7564633242 | 2.6693633797 |
| C13 | 12.0981795902 | 11.5113957330 | 3.9937209185 |
| H14 | 13.6465688309 | 13.7577048404 | 2.4251692341 |

|      |               |               |               |
|------|---------------|---------------|---------------|
| H15  | 12.1767671631 | 11.2243613746 | 1.8638228748  |
| H16  | 13.7361455990 | 11.4185673317 | 2.6928995921  |
| H17  | 12.5726496871 | 12.0568873419 | 4.8091083623  |
| C18  | 9.0683809797  | 8.8750394263  | 5.2259133368  |
| C19  | 9.7301171297  | 9.6757846748  | 6.1656725159  |
| C20  | 10.6996387136 | 10.5661115114 | 5.7379232704  |
| C21  | 11.0324099729 | 10.6670620862 | 4.3546571944  |
| C22  | 10.3337628443 | 9.8495710646  | 3.4178437481  |
| C23  | 9.3706042113  | 8.9626326799  | 3.8556075812  |
| H24  | 8.3030996194  | 8.1801402676  | 5.5608366953  |
| H25  | 9.4823666947  | 9.5986643363  | 7.2191439940  |
| H26  | 11.2232557095 | 11.1927805407 | 6.4538221060  |
| H27  | 10.5364009839 | 9.9450466258  | 2.3575318047  |
| H28  | 8.8332345470  | 8.3485493553  | 3.1402027503  |
| O29  | 9.8447836854  | 14.7049581516 | 4.5186736034  |
| Au30 | 9.4819990490  | 12.4795955129 | 0.7944770897  |
| P31  | 8.6488200270  | 11.2394368169 | -1.0781633899 |
| C32  | 5.0829938100  | 13.3617566053 | -3.1287210428 |
| C33  | 6.1170698453  | 14.1031876329 | -2.5541395030 |
| C34  | 7.1770648436  | 13.4527505260 | -1.9237972173 |
| C35  | 7.2123637495  | 12.0501624623 | -1.8706283220 |
| C36  | 6.1671002725  | 11.3098095983 | -2.4451673233 |
| C37  | 5.1084706603  | 11.9671476258 | -3.0722313070 |
| H38  | 4.2554533500  | 13.8700054207 | -3.6151213332 |
| H39  | 6.0962400091  | 15.1883436780 | -2.5902252826 |
| H40  | 7.9743456491  | 14.0352115440 | -1.4692250474 |
| H41  | 6.1735794873  | 10.2249572456 | -2.3994325924 |
| H42  | 4.3023591517  | 11.3885860898 | -3.5140612061 |
| C43  | 7.0348696801  | 7.0968851574  | 0.2739384902  |
| C44  | 6.6161565491  | 8.2745420636  | 0.9022981131  |
| C45  | 7.1226063999  | 9.5066296458  | 0.4903432047  |
| C46  | 8.0423120945  | 9.5784571323  | -0.5706207350 |
| C47  | 8.4573258361  | 8.3953280017  | -1.1964075170 |
| C48  | 7.9569294082  | 7.1616146368  | -0.7707949467 |
| H49  | 6.6386108467  | 6.1374518322  | 0.5935763722  |
| H50  | 5.8873122985  | 8.2339768680  | 1.7073820552  |
| H51  | 6.7915262301  | 10.4170027756 | 0.9842976802  |
| H52  | 9.1652261048  | 8.4320623720  | -2.0183122345 |
| H53  | 8.2841696329  | 6.2515906117  | -1.2653906469 |
| C54  | 11.8209617007 | 10.4618464051 | -4.3682932844 |
| C55  | 10.4730678773 | 10.5584896136 | -4.7203579837 |
| C56  | 9.5061414058  | 10.8035079167 | -3.7449091953 |
| C57  | 9.8834946164  | 10.9532509002 | -2.4011371740 |
| C58  | 11.2414252469 | 10.8686884618 | -2.0564108013 |
| C59  | 12.2034823459 | 10.6185992967 | -3.0345765447 |
| H60  | 12.5705680729 | 10.2742437530 | -5.1312629621 |
| H61  | 10.1719970794 | 10.4473401694 | -5.7579376553 |
| H62  | 8.4626733745  | 10.8850658583 | -4.0327425854 |
| H63  | 11.5446153725 | 11.0095512019 | -1.0221668066 |
| H64  | 13.2518618026 | 10.5561127653 | -2.7574148232 |

|     |               |               |              |
|-----|---------------|---------------|--------------|
| C65 | 10.3536796601 | 16.7444883753 | 5.6088531342 |
| H66 | 11.2298681953 | 16.2627291443 | 6.0515775520 |
| H67 | 10.5612267778 | 17.7956777965 | 5.4112580484 |
| H68 | 9.5350341109  | 16.6624328633 | 6.3310492712 |

**Table S10.** Absolute energies and positional coordinates for **A5**.

Gas phase:

SCFE: -1903.31194307830 a.u.

ZPE: 331.321 kcal/mol

G<sub>STP</sub>: -1902.859512 a.u.

Dichloromethane:

SCFE: -1903.36608004516 a.u.

G<sub>STP</sub>: -1902.913649 a.u.

Nitromethane:

SCFE: -1903.37220293173 a.u.

G<sub>STP</sub>: -1902.919772 a.u.

|      |               |               |               |
|------|---------------|---------------|---------------|
| C1   | 4.3800564177  | 0.9347844097  | 2.7789910253  |
| C2   | 3.2098821351  | 0.2730488509  | 2.6996143068  |
| C3   | 2.4990414094  | 0.6426600929  | 1.4770601727  |
| H4   | 5.0883715797  | 0.8352121558  | 3.5955637519  |
| H5   | 2.8227367593  | -0.4373017700 | 3.4192608708  |
| C6   | 1.2525200294  | 0.1723359396  | 1.0860686497  |
| O7   | 0.5591621177  | -0.5684407331 | 2.0659082774  |
| C8   | -0.0453193743 | -1.7479029835 | 1.7168387978  |
| O9   | 0.1322216539  | -2.2806366701 | 0.6430144591  |
| C10  | 0.3668622314  | 0.7841988905  | 0.0311419574  |
| H11  | 0.9489777600  | 1.3259766046  | -0.7150636138 |
| H12  | -0.2263842330 | 0.0187711910  | -0.4725151828 |
| H13  | -0.3151019773 | 1.4966306789  | 0.5108080154  |
| C14  | 4.6233782525  | 1.8243581667  | 1.5944595978  |
| H15  | 5.4443247510  | 1.4289581377  | 0.9796722107  |
| H16  | 4.9105466896  | 2.8400330203  | 1.8857050476  |
| C17  | 3.2649007482  | 1.8094084377  | 0.8218067550  |
| H18  | 3.4386638837  | 1.6164761078  | -0.2397611964 |
| C19  | 1.1473932369  | 5.5810026674  | 1.0983199583  |
| C20  | 1.2631632511  | 4.7648179490  | 2.2251148083  |
| C21  | 1.9363919653  | 3.5468729989  | 2.1449924951  |
| C22  | 2.5011811071  | 3.1252873229  | 0.9330779793  |
| C23  | 2.3803458188  | 3.9507048979  | -0.1917838773 |
| C24  | 1.7098386687  | 5.1724353223  | -0.1106250155 |
| H25  | 0.6217019044  | 6.5289354982  | 1.1632530046  |
| H26  | 0.8274594399  | 5.0768223624  | 3.1698938376  |
| H27  | 2.0199935915  | 2.9245229228  | 3.0316465337  |
| H28  | 2.8170610172  | 3.6388225602  | -1.1385007946 |
| H29  | 1.6267972851  | 5.8015379111  | -0.9921465059 |
| Au30 | 2.7493278033  | -1.2867045349 | -0.0441694029 |

|     |               |               |               |
|-----|---------------|---------------|---------------|
| P31 | 3.8897346835  | -2.9381122374 | -1.2623725533 |
| C32 | 1.5593727789  | -4.2040463037 | -5.0410762994 |
| C33 | 0.8744282422  | -3.8431058138 | -3.8787511086 |
| C34 | 1.5807246386  | -3.4424651531 | -2.7457958767 |
| C35 | 2.9854326823  | -3.4122470762 | -2.7743124886 |
| C36 | 3.6710044654  | -3.7704615020 | -3.9448832260 |
| C37 | 2.9540568352  | -4.1662299854 | -5.0736172513 |
| H38 | 1.0055005344  | -4.5107848852 | -5.9233223026 |
| H39 | -0.2110033844 | -3.8685239759 | -3.8548911817 |
| H40 | 1.0428885350  | -3.1602403464 | -1.8437084293 |
| H41 | 4.7558125472  | -3.7391932339 | -3.9776018096 |
| H42 | 3.4866653204  | -4.4425210231 | -5.9785503065 |
| C43 | 4.3718603187  | -6.7072365053 | 1.3724666316  |
| C44 | 4.6357716550  | -5.4389470599 | 1.8955698141  |
| C45 | 4.4845363071  | -4.3091716204 | 1.0964051527  |
| C46 | 4.0785098036  | -4.4414140754 | -0.2418072171 |
| C47 | 3.8104822673  | -5.7157392991 | -0.7623115863 |
| C48 | 3.9595265353  | -6.8436202720 | 0.0470924115  |
| H49 | 4.4829020242  | -7.5866708816 | 1.9998118462  |
| H50 | 4.9523522740  | -5.3306971186 | 2.9284996126  |
| H51 | 4.6816075774  | -3.3239569894 | 1.5113404461  |
| H52 | 3.4874692225  | -5.8307506264 | -1.7921985995 |
| H53 | 3.7488699670  | -7.8279088148 | -0.3606290765 |
| C54 | 8.1063349006  | -1.5372790929 | -2.5529419641 |
| C55 | 7.9421982281  | -2.8089141650 | -2.0047013595 |
| C56 | 6.6775468890  | -3.2473164243 | -1.6080508978 |
| C57 | 5.5660498550  | -2.4046850345 | -1.7585928511 |
| C58 | 5.7372480726  | -1.1215943825 | -2.3045215898 |
| C59 | 7.0013030978  | -0.6956771621 | -2.7049297535 |
| H60 | 9.0919053856  | -1.1999404072 | -2.8581130161 |
| H61 | 8.7985297050  | -3.4651519500 | -1.8820158292 |
| H62 | 6.5602973169  | -4.2385255411 | -1.1812131457 |
| H63 | 4.8820256951  | -0.4597501307 | -2.4180238066 |
| H64 | 7.1254923712  | 0.2953206710  | -3.1309561225 |
| C65 | -0.9268387566 | -2.2657941017 | 2.8185135082  |
| H66 | -0.7212110551 | -1.7745289240 | 3.7694017141  |
| H67 | -1.9716060743 | -2.0812519897 | 2.5447369357  |
| H68 | -0.7957423870 | -3.3465113208 | 2.9035156603  |

**Table S11.** Absolute energies and positional coordinates for **Ats6**.

Gas phase:

SCFE: -1903.218397 a.u.

ZPE: 328.627 kcal/mol

G<sub>STP</sub>: -1902.773380 a.u.

Imaginary frequencies: -59 cm<sup>-1</sup>

Dichloromethane:

SCFE: -1903.290575 a.u.

G<sub>STP</sub>: -1902.845558 a.u.

Nitromethane:

SCFE: -1903.299390 a.u.

G<sub>STP</sub>: -1902.854373 a.u.

|      |               |               |               |
|------|---------------|---------------|---------------|
| C1   | 0.3297348561  | 20.7695193684 | 15.5082913526 |
| O2   | 1.3990136182  | 20.2766387927 | 15.7706856350 |
| C3   | 0.0824908128  | 17.6889469445 | 15.1003583183 |
| C4   | 0.3128328312  | 18.2370800142 | 13.7641065223 |
| C5   | 0.0522126085  | 19.5234846521 | 13.4522254654 |
| H6   | 0.9479502448  | 17.2280749158 | 15.5838352539 |
| C7   | 0.1826264207  | 20.1954145666 | 12.1206109171 |
| H8   | 0.4043641820  | 19.4717675980 | 11.3345042870 |
| H9   | -0.7439178139 | 20.7245014736 | 11.8681849853 |
| H10  | 0.9838526186  | 20.9456361437 | 12.1465122810 |
| C11  | -1.1034482009 | 17.6445211797 | 15.7341949708 |
| C12  | -1.2863759815 | 16.9530934990 | 17.0643349803 |
| C13  | -1.5437492090 | 15.4963961770 | 17.0171689386 |
| H14  | -1.9837413440 | 18.1031504777 | 15.2894160374 |
| H15  | -0.3028416468 | 17.0075723250 | 17.5831631055 |
| H16  | -1.9877111253 | 17.4646562683 | 17.7348323671 |
| H17  | -1.2749946978 | 15.0079659834 | 16.0792017202 |
| C18  | -3.0122089821 | 12.9216575297 | 19.9860478797 |
| C19  | -2.6314628216 | 12.4088814350 | 18.7373714094 |
| C20  | -2.1290208684 | 13.2655702351 | 17.7763507548 |
| C21  | -2.0063700424 | 14.6657048349 | 18.0439320989 |
| C22  | -2.3973058480 | 15.1606094671 | 19.3280215237 |
| C23  | -2.8930749004 | 14.2927652911 | 20.2794337940 |
| H24  | -3.4056430336 | 12.2482174585 | 20.7423430969 |
| H25  | -2.7293088502 | 11.3481789768 | 18.5316214550 |
| H26  | -1.8271102915 | 12.8873842535 | 16.8036005149 |
| H27  | -2.3031138821 | 16.2171752080 | 19.5522994564 |
| H28  | -3.1927063830 | 14.6629145084 | 21.2542965845 |
| O29  | -0.4208526784 | 20.4486788921 | 14.4072585382 |
| Au30 | 1.1019825936  | 16.8898288601 | 12.3993694162 |
| P31  | 2.0115173443  | 15.2975089529 | 10.8542821504 |
| C32  | 1.9481969098  | 16.8701180522 | 6.4979442040  |
| C33  | 2.2815326459  | 17.7136610101 | 7.5600057296  |
| C34  | 2.2768640296  | 17.2272956359 | 8.8656711294  |
| C35  | 1.9489224085  | 15.8854728594 | 9.1185828654  |
| C36  | 1.6117763975  | 15.0435679392 | 8.0493703561  |
| C37  | 1.6116023326  | 15.5388535834 | 6.7441693200  |
| H38  | 1.9474111097  | 17.2515638336 | 5.4809916047  |
| H39  | 2.5406188412  | 18.7514988432 | 7.3720306999  |
| H40  | 2.5317197002  | 17.8882028193 | 9.6904449290  |
| H41  | 1.3480199124  | 14.0064232694 | 8.2313817289  |
| H42  | 1.3480815145  | 14.8819475016 | 5.9202339627  |
| C43  | -0.3326648156 | 11.2907225086 | 10.8295981960 |
| C44  | -1.0013023613 | 12.5129858845 | 10.9362733174 |



|     |               |               |               |
|-----|---------------|---------------|---------------|
| C45 | -0.2807925307 | 13.7063980151 | 10.9627165750 |
| C46 | 1.1207352787  | 13.6908154615 | 10.8677382728 |
| C47 | 1.7867476347  | 12.4606662128 | 10.7663782631 |
| C48 | 1.0602768669  | 11.2680127255 | 10.7493172790 |
| H49 | -0.8947213022 | 10.3615273866 | 10.8091065311 |
| H50 | -2.0857294097 | 12.5376624958 | 10.9975592945 |
| H51 | -0.8061729791 | 14.6541257393 | 11.0517534129 |
| H52 | 2.8697262477  | 12.4302642741 | 10.6995521971 |
| H53 | 1.5865280960  | 10.3210963404 | 10.6688829247 |
| C54 | 6.4373883533  | 14.2593214472 | 11.7512246669 |
| C55 | 5.9850450045  | 14.2484149408 | 10.4307811057 |
| C56 | 4.6584580871  | 14.5684141290 | 10.1405063302 |
| C57 | 3.7718268617  | 14.9016422585 | 11.1762744531 |
| C58 | 4.2370542154  | 14.9225158420 | 12.5002547490 |
| C59 | 5.5623974574  | 14.5973565839 | 12.7850311052 |
| H60 | 7.4718551680  | 14.0134098470 | 11.9730033464 |
| H61 | 6.6659912383  | 13.9949701874 | 9.6234066098  |
| H62 | 4.3180184051  | 14.5657967287 | 9.1095368319  |
| H63 | 3.5625302430  | 15.2033597243 | 13.3049714813 |
| H64 | 5.9144941280  | 14.6184846605 | 13.8122739814 |
| C65 | -0.3811543840 | 21.8262790119 | 16.3177625053 |
| H66 | -1.4022440060 | 21.5069072281 | 16.5463787078 |
| H67 | 0.1725971935  | 22.0136052118 | 17.2374036346 |
| H68 | -0.4538577877 | 22.7516838547 | 15.7380676298 |

**Table S12.** Absolute energies and positional coordinates for **AuPPh<sub>3</sub><sup>+</sup>**.

Gas phase:

SCFE: -1171.580886 a.u.

ZPE: 166.388 kcal/mol

G<sub>STP</sub>: -1171.366728 a.u.

Dichloromethane:

SCFE: -1171.651073 a.u.

G<sub>STP</sub>: -1171.436915 a.u.

|     |                  |                  |                  |
|-----|------------------|------------------|------------------|
| Au1 | 0.00000000000000 | 0.00000000000000 | 0.00000000000000 |
| P2  | 0.00000000000000 | 0.00000000000000 | 2.3065962124770  |
| C3  | 4.3448668821942  | 0.00000000000000 | 3.8233884009027  |
| C4  | 3.9502424605462  | 0.8920682567028  | 2.8208179080358  |
| C5  | 2.6409572535377  | 0.8762282108502  | 2.3488865677413  |
| C6  | 1.7154433201475  | -0.0347531048172 | 2.8882315245755  |
| C7  | 2.1120014810498  | -0.9325236555415 | 3.8924920661234  |
| C8  | 3.4278288572476  | -0.9073676370505 | 4.3559324961002  |
| H9  | 5.3684740428932  | 0.0110767356769  | 4.1848519546734  |
| H10 | 4.6644038556252  | 1.5946719660589  | 2.4030403706729  |
| H11 | 2.3394925065812  | 1.5646266133446  | 1.5635208368864  |
| H12 | 1.4053738246635  | -1.6416348582173 | 4.3105037647581  |
| H13 | 3.7344079833176  | -1.6003186789873 | 5.1332762760845  |
| C14 | -2.1678342500281 | -3.7493339838544 | 3.8544873125296  |

|     |                  |                  |                 |
|-----|------------------|------------------|-----------------|
| C15 | -1.2209475959107 | -3.8600760125453 | 2.8313564651235 |
| C16 | -0.5818404701715 | -2.7223723606109 | 2.3479307372007 |
| C17 | -0.8878764677621 | -1.4647467267480 | 2.8967307794088 |
| C18 | -1.8414306581113 | -1.3531634071560 | 3.9215626695155 |
| C19 | -2.4754272990061 | -2.5010278158422 | 4.3967979991043 |
| H20 | -2.6689632367289 | -4.6383876640440 | 4.2251059015991 |
| H21 | -0.9867041356130 | -4.8313333327606 | 2.4071434301368 |
| H22 | 0.1481989025168  | -2.8089855865720 | 1.5472843367017 |
| H23 | -2.0863647819726 | -0.3854683012316 | 4.3461749387089 |
| H24 | -3.2117924827505 | -2.4169113444834 | 5.1899831846116 |
| C25 | -2.1796026642520 | 3.7418075393346  | 3.8545961018248 |
| C26 | -0.9356662519897 | 3.3999805585620  | 4.3861929629734 |
| C27 | -0.2514189781678 | 2.2816495717385  | 3.9099357693293 |
| C28 | -0.8264953876110 | 1.5008247747704  | 2.8948700550469 |
| C29 | -2.0781149226745 | 1.8483684405290  | 2.3567482934285 |
| C30 | -2.7509874716894 | 2.9659742159865  | 2.8409621333649 |
| H31 | -2.7050337839475 | 4.6162216212203  | 4.2263899398173 |
| H32 | -0.4934012060899 | 4.0039296387269  | 5.1723210782782 |
| H33 | 0.7158763385956  | 2.0215891895542  | 4.3265558788337 |
| H34 | -2.5200101820034 | 1.2502821989119  | 1.5639368760138 |
| H35 | -3.7167065729123 | 3.2359588071572  | 2.4253974121386 |

**Table S13.** Absolute energies and positional coordinates for **A1 - AuPPh<sub>3</sub><sup>+</sup>**.

Gas phase:

SCFE: -731.607253 a.u.

ZPE: 163.515 kcal/mol

G<sub>STP</sub>: -731.395550 a.u.

Dichloromethane:

SCFE: -731.620846 a.u.

G<sub>STP</sub>: -731.409144 a.u.

|     |              |               |              |
|-----|--------------|---------------|--------------|
| C1  | 0.0146435160 | 0.1562706703  | 0.1438709402 |
| O2  | 0.0258754104 | 0.0833279335  | 1.4959061264 |
| C3  | 1.3176816398 | 0.1306239130  | 2.1855897322 |
| C4  | 1.9753917118 | 1.4283277379  | 2.0107326459 |
| C5  | 2.5209203990 | 2.5020086494  | 1.9054912237 |
| H6  | 1.0103678078 | 0.0318644714  | 3.2311726512 |
| C7  | 3.1747288447 | 3.7985219639  | 1.7529989751 |
| H8  | 3.1469818746 | 4.1308874801  | 0.7091681790 |
| H9  | 2.6880411528 | 4.5664523578  | 2.3645832303 |
| H10 | 4.2264823326 | 3.7469678304  | 2.0565776721 |
| C11 | 2.2130790292 | -1.0414994642 | 1.8280658524 |
| C12 | 1.7904758990 | -2.4349243067 | 2.2247643232 |
| C13 | 2.9587475586 | -1.7919550636 | 2.9259887462 |
| H14 | 2.7278564886 | -0.9285233579 | 0.8817688741 |
| H15 | 0.8595572468 | -2.5300165570 | 2.7765050761 |
| H16 | 1.9768309265 | -3.2464586841 | 1.5283143727 |
| H17 | 3.9424987625 | -2.1414559722 | 2.6154014624 |

|     |               |               |               |
|-----|---------------|---------------|---------------|
| C18 | 2.8694415216  | -0.6166069868 | 7.0783102474  |
| C19 | 2.1302192557  | -1.7196247538 | 6.6533011723  |
| C20 | 2.1471035282  | -2.1005930848 | 5.3099198515  |
| C21 | 2.8991922316  | -1.3851417731 | 4.3699200552  |
| C22 | 3.6411778441  | -0.2778578527 | 4.8115163192  |
| C23 | 3.6271292463  | 0.1032313632  | 6.1517037319  |
| H24 | 2.8553296368  | -0.3179118877 | 8.1227834906  |
| H25 | 1.5396130894  | -2.2874401038 | 7.3671105500  |
| H26 | 1.5760764258  | -2.9668865213 | 4.9881784292  |
| H27 | 4.2201323428  | 0.2930078439  | 4.0906025423  |
| H28 | 4.2035178190  | 0.9663715882  | 6.4734675213  |
| O29 | 1.0035505577  | 0.2289210883  | -0.5507780532 |
| C30 | -1.4084821793 | 0.1415711530  | -0.3680427006 |
| H31 | -1.3998522698 | 0.0966565624  | -1.4568775908 |
| H32 | -1.9526486838 | -0.7135923265 | 0.0421780558  |
| H33 | -1.9278327973 | 1.0476058560  | -0.0404866666 |

**Table S14.** Absolute energies and positional coordinates for **A3 - AuPPh<sub>3</sub><sup>+</sup>**.

Gas phase:

SCFE: -731.613267 a.u.

ZPE: 163.089 kcal/mol

G<sub>STP</sub>: -731.403310 a.u.

Dichloromethane:

SCFE: -731.626897 a.u.

G<sub>STP</sub>: -731.416940 a.u.

|     |                 |                  |                  |
|-----|-----------------|------------------|------------------|
| C1  | 0.000000000000  | 0.000000000000   | 0.000000000000   |
| O2  | 0.000000000000  | 0.000000000000   | 1.2055328620410  |
| C3  | 3.4830505915885 | 0.000000000000   | 1.7578742112289  |
| C4  | 2.8060624386975 | 0.5412333239057  | 0.7745084603941  |
| C5  | 2.1346776695184 | 1.1134330306686  | -0.1920689089658 |
| H6  | 3.2012532685249 | 0.2466892145521  | 2.7832351825897  |
| C7  | 2.4692078030375 | 2.4188762667425  | -0.8546694092924 |
| H8  | 3.3968949170985 | 2.8269872547871  | -0.4490288411712 |
| H9  | 2.5836418555758 | 2.2857587574186  | -1.9368122664155 |
| H10 | 1.6648552778754 | 3.1473229156473  | -0.6961145383784 |
| C11 | 4.6144299144008 | -0.9453375261954 | 1.5895864035989  |
| C12 | 4.7765188234444 | -2.1044582558597 | 2.5568931873158  |
| C13 | 5.7675248214411 | -0.9779390747356 | 2.6045070421399  |
| H14 | 4.8954827621620 | -1.1330853226065 | 0.5571902657656  |
| H15 | 4.0429358621926 | -2.1786618618820 | 3.3539605988673  |
| H16 | 5.0945232660205 | -3.0632224913354 | 2.1588438556448  |
| H17 | 6.7307945227278 | -1.1859681360715 | 2.1410031227556  |
| C18 | 6.0843675800025 | 1.8488937037089  | 5.8495664737695  |
| C19 | 6.5406027983778 | 2.1744147744318  | 4.5699793644966  |
| C20 | 6.4254504421672 | 1.2536887294338  | 3.5312958222996  |
| C21 | 5.8546468110879 | -0.0108889262228 | 3.7463251936123  |
| C22 | 5.4087389781363 | -0.3268402143162 | 5.0351362546949  |

|     |                  |                  |                  |
|-----|------------------|------------------|------------------|
| C23 | 5.5194545629060  | 0.5953885530526  | 6.0780811765295  |
| H24 | 6.1709287655500  | 2.5667099933961  | 6.6603899068555  |
| H25 | 6.9834088438179  | 3.1486928577628  | 4.3815958713253  |
| H26 | 6.7760119971422  | 1.5144418347480  | 2.5356795531718  |
| H27 | 4.9818203023073  | -1.3059987200788 | 5.2295563291235  |
| H28 | 5.1669347635595  | 0.3294294627351  | 7.0709104658667  |
| O29 | 0.9916075722997  | 0.5275051551280  | -0.7828651437918 |
| C30 | -1.0864829175563 | -0.5712158534614 | -0.8816780382074 |
| H31 | -0.6753526351460 | -1.3637864452190 | -1.5141143493781 |
| H32 | -1.8841487767183 | -0.9714781759069 | -0.2564307951696 |
| H33 | -1.4828565414692 | 0.2033973644066  | -1.5445732456367 |

**Table S15.** Absolute energies and positional coordinates for **B1**.

Gas phase:

SCFE: -1827.96984604720 a.u.

ZPE: 327.615 kcal/mol

G<sub>STP</sub>: -1827.522465 a.u.

Dichloromethane:

SCFE: -1828.02632138945 a.u.

G<sub>STP</sub>: -1827.578941 a.u.

Nitromethane:

SCFE: -1828.03223929557 a.u.

G<sub>STP</sub>: -1827.584858 a.u.

|     |               |               |              |
|-----|---------------|---------------|--------------|
| C1  | 7.0668226506  | 10.9972306748 | 3.8708480469 |
| O2  | 7.2240737626  | 12.2730283478 | 3.3992363298 |
| C3  | 8.3188242466  | 13.0968381129 | 3.8231483031 |
| C4  | 9.6340920015  | 12.5972612343 | 3.3240927237 |
| C5  | 10.8176216343 | 12.3316864874 | 3.1085488604 |
| H6  | 6.0863544210  | 10.6388018755 | 3.5692703002 |
| H7  | 8.1233328304  | 14.0401049619 | 3.3022951857 |
| C8  | 12.2632430300 | 12.0822349468 | 3.0766752183 |
| H9  | 12.4765156948 | 11.0116738462 | 3.0049564181 |
| H10 | 12.7369072848 | 12.5914481023 | 2.2329906654 |
| H11 | 12.7075138279 | 12.4599885076 | 4.0037050209 |
| C12 | 8.3596473871  | 13.3763039142 | 5.3145879173 |
| C13 | 7.1710414295  | 14.0853359031 | 5.9208974581 |
| C14 | 8.4724094597  | 14.8260254869 | 5.8019810918 |
| H15 | 8.8519157882  | 12.6265994557 | 5.9240277394 |
| H16 | 6.3614179441  | 14.3473790509 | 5.2467612172 |
| H17 | 6.8397429002  | 13.7645848536 | 6.9028848796 |
| H18 | 9.0444779667  | 14.9169251290 | 6.7231653016 |
| C19 | 9.1850137557  | 18.0947841383 | 3.0762291817 |
| C20 | 7.8756106794  | 17.7207804084 | 3.3732049918 |
| C21 | 7.6267751895  | 16.6667327283 | 4.2566209546 |
| C22 | 8.6846959321  | 15.9677897578 | 4.8520690200 |
| C23 | 9.9992792159  | 16.3615523240 | 4.5507556618 |

|      |               |               |               |
|------|---------------|---------------|---------------|
| C24  | 10.2488368057 | 17.4131854530 | 3.6725242559  |
| H25  | 9.3777125286  | 18.9185819042 | 2.3952008615  |
| H26  | 7.0417640895  | 18.2561156509 | 2.9278983485  |
| H27  | 6.6007926853  | 16.4052922657 | 4.4984697568  |
| H28  | 10.8309921276 | 15.8414495025 | 5.0206860072  |
| H29  | 11.2723631940 | 17.7072632162 | 3.4580203920  |
| C30  | 7.9077860524  | 10.2303158591 | 4.5694268226  |
| H31  | 7.5863917640  | 9.2340685778  | 4.8492019536  |
| H32  | 8.8922342957  | 10.5412646588 | 4.8938378696  |
| Au33 | 9.5528919790  | 11.6110699509 | 1.2047510373  |
| P34  | 8.7613281649  | 10.7894317886 | -0.8409819937 |
| C35  | 12.0460780163 | 10.6567536570 | -4.0876406101 |
| C36  | 12.3056647025 | 10.1839952143 | -2.7984150079 |
| C37  | 11.3159172077 | 10.2456992551 | -1.8206345486 |
| C38  | 10.0533734166 | 10.7757656339 | -2.1315597745 |
| C39  | 9.7960554707  | 11.2511051838 | -3.4252702786 |
| C40  | 10.7950935609 | 11.1896316299 | -4.3982496720 |
| H41  | 12.8205966920 | 10.6119172141 | -4.8474853434 |
| H42  | 13.2798237844 | 9.7705723336  | -2.5551203629 |
| H43  | 11.5220474135 | 9.8773777748  | -0.8185423169 |
| H44  | 8.8258341788  | 11.6685681062 | -3.6742813590 |
| H45  | 10.5930382461 | 11.5599279965 | -5.3988646089 |
| C46  | 5.4167675381  | 13.5829678112 | -2.3825190255 |
| C47  | 6.5782840910  | 14.1140342939 | -1.8155003998 |
| C48  | 7.5730878756  | 13.2635045846 | -1.3380083139 |
| C49  | 7.4141292836  | 11.8704970917 | -1.4341678088 |
| C50  | 6.2455925644  | 11.3415494581 | -2.0003923254 |
| C51  | 5.2520223003  | 12.2007391254 | -2.4719173580 |
| H52  | 4.6400118832  | 14.2470989334 | -2.7499408387 |
| H53  | 6.7076688728  | 15.1897359080 | -1.7414036901 |
| H54  | 8.4727098436  | 13.6827535287 | -0.8935107972 |
| H55  | 6.1076766123  | 10.2676505736 | -2.0733298870 |
| H56  | 4.3480981406  | 11.7866799657 | -2.9083903311 |
| C57  | 6.9790725244  | 6.5348631605  | -0.5379862072 |
| C58  | 7.5628772370  | 6.9610811620  | -1.7326814843 |
| C59  | 8.1265440846  | 8.2336062626  | -1.8245152290 |
| C60  | 8.1043444365  | 9.0917002784  | -0.7130628270 |
| C61  | 7.5274238968  | 8.6561112571  | 0.4904060379  |
| C62  | 6.9648586888  | 7.3824720054  | 0.5720154878  |
| H63  | 6.5428253332  | 5.5428096922  | -0.4702685857 |
| H64  | 7.5831412800  | 6.3019936507  | -2.5954296782 |
| H65  | 8.5835718903  | 8.5532516501  | -2.7559722836 |
| H66  | 7.5226874507  | 9.3040025608  | 1.3634145798  |
| H67  | 6.5204495900  | 7.0500933003  | 1.5054419753  |

**Table S16.** Absolute energies and positional coordinates for **Bts1**.

Gas phase:

SCFE: -1827.96441811422 a.u.

ZPE: 327.798 kcal/mol

G<sub>STP</sub>: -1827.517128 a.u.  
Imaginary frequencies: -171 cm<sup>-1</sup>

Dichloromethane:  
SCFE: -1828.01976630163 a.u.  
G<sub>STP</sub>: -1827.572477 a.u.

Nitromethane:  
SCFE: -1828.02581125372 a.u.  
G<sub>STP</sub>: -1827.578522 a.u.

|      |               |               |               |
|------|---------------|---------------|---------------|
| C1   | 11.2521835208 | 14.9327421733 | 4.1189164941  |
| O2   | 12.0406129469 | 14.4210219651 | 3.1712756833  |
| C3   | 11.8420454289 | 13.0693172505 | 2.6839252741  |
| C4   | 10.3647295267 | 12.8472295996 | 2.4218340984  |
| C5   | 9.3323887387  | 13.2489439213 | 3.0345057082  |
| H6   | 11.2644851217 | 16.0200659101 | 4.0830312076  |
| H7   | 12.3889185562 | 13.0857754555 | 1.7403743916  |
| C8   | 7.9370265878  | 13.4964883180 | 3.3942639544  |
| H9   | 7.2906547735  | 12.9886974910 | 2.6680582174  |
| H10  | 7.7018467221  | 13.1040391746 | 4.3881604187  |
| H11  | 7.7037895502  | 14.5650180358 | 3.3695023124  |
| C12  | 12.4282316737 | 11.9966295244 | 3.5820525112  |
| C13  | 13.8880489494 | 12.0816104994 | 3.9578437399  |
| C14  | 13.4488702060 | 10.9905838533 | 3.0237678885  |
| H15  | 11.7496996262 | 11.5912191353 | 4.3265396252  |
| H16  | 14.4509099520 | 12.9173694463 | 3.5539289123  |
| H17  | 14.1693588103 | 11.8138336168 | 4.9711907337  |
| H18  | 13.3481778127 | 10.0071225984 | 3.4775382853  |
| C19  | 14.5154725289 | 10.6643104226 | -1.1461401478 |
| C20  | 15.0373739580 | 11.7093210957 | -0.3840831044 |
| C21  | 14.7018860744 | 11.8342964282 | 0.9661339569  |
| C22  | 13.8306225780 | 10.9220098189 | 1.5767541092  |
| C23  | 13.3079752113 | 9.8770832327  | 0.7953512135  |
| C24  | 13.6489289370 | 9.7445274630  | -0.5495889553 |
| H25  | 14.7927613449 | 10.5571408743 | -2.1910382606 |
| H26  | 15.7242427673 | 12.4212067292 | -0.8332239236 |
| H27  | 15.1506480290 | 12.6340021500 | 1.5477158321  |
| H28  | 12.6419139277 | 9.1503325122  | 1.2545947983  |
| H29  | 13.2438246191 | 8.9196147016  | -1.1291370613 |
| C30  | 10.4645672735 | 14.2684859849 | 4.9978361320  |
| H31  | 9.8497989292  | 14.8496604388 | 5.6761170117  |
| H32  | 10.5510963471 | 13.2088325483 | 5.1935566767  |
| Au33 | 9.7278451745  | 11.7648643942 | 0.6729268160  |
| P34  | 9.0126826402  | 10.7535185033 | -1.3346496622 |
| C35  | 4.3910787722  | 10.7882203489 | -1.6381058337 |
| C36  | 5.0867393742  | 11.9267303504 | -1.2214897584 |
| C37  | 6.4758200962  | 11.8984126779 | -1.1177046353 |
| C38  | 7.1851015408  | 10.7292828267 | -1.4412913505 |
| C39  | 6.4838571205  | 9.5894481938  | -1.8589118785 |

|     |               |               |               |
|-----|---------------|---------------|---------------|
| C40 | 5.0908865603  | 9.6235825979  | -1.9539990591 |
| H41 | 3.3081818630  | 10.8104363745 | -1.7148607327 |
| H42 | 4.5464838778  | 12.8367382236 | -0.9772179402 |
| H43 | 7.0115086643  | 12.7885323972 | -0.7962124918 |
| H44 | 7.0176702548  | 8.6789814284  | -2.1110181626 |
| H45 | 4.5548493200  | 8.7364167866  | -2.2779791003 |
| C46 | 10.3659291238 | 6.3580225015  | -1.8000162148 |
| C47 | 9.9618251866  | 6.8454426104  | -0.5544653574 |
| C48 | 9.5754528391  | 8.1774962512  | -0.4183516760 |
| C49 | 9.5808916135  | 9.0289265106  | -1.5349183311 |
| C50 | 9.9890298432  | 8.5367854985  | -2.7831039017 |
| C51 | 10.3811930056 | 7.2034380081  | -2.9102584534 |
| H52 | 10.6718107427 | 5.3210952786  | -1.9035200121 |
| H53 | 9.9521391876  | 6.1893240018  | 0.3107998923  |
| H54 | 9.2691427600  | 8.5562876850  | 0.5535787177  |
| H55 | 10.0043421407 | 9.1885926848  | -3.6508649701 |
| H56 | 10.6978885820 | 6.8267469444  | -3.8784077582 |
| C57 | 10.6054493535 | 13.0889680250 | -4.9927461366 |
| C58 | 9.2936663301  | 12.6138858913 | -5.0008471531 |
| C59 | 8.7929898795  | 11.9163144327 | -3.9009457101 |
| C60 | 9.6111359842  | 11.6934770308 | -2.7835182651 |
| C61 | 10.9300724839 | 12.1758669527 | -2.7775343661 |
| C62 | 11.4230999919 | 12.8674710973 | -3.8820191820 |
| H63 | 10.9898341674 | 13.6343413404 | -5.8497380104 |
| H64 | 8.6561166338  | 12.7868989843 | -5.8628129192 |
| H65 | 7.7701163481  | 11.5532858621 | -3.9132378037 |
| H66 | 11.5724180122 | 12.0053165108 | -1.9171366148 |
| H67 | 12.4436220914 | 13.2385691704 | -3.8733227564 |

**Table S17.** Absolute energies and positional coordinates for **B3**.

Gas phase:

SCFE: -1828.00924997341 a.u.

ZPE: 327.330 kcal/mol

G<sub>STP</sub>: -1827.563110 a.u.

Dichloromethane:

SCFE: -1828.06503606221 a.u.

G<sub>STP</sub>: -1827.618896 a.u.

Nitromethane:

SCFE: -1828.07153580274 a.u.

G<sub>STP</sub>: -1827.625396 a.u.

|    |               |               |              |
|----|---------------|---------------|--------------|
| C1 | 10.5913398113 | 14.6812722494 | 4.9429243603 |
| O2 | 11.4259525485 | 14.8003579857 | 4.0720831908 |
| C3 | 11.2836644546 | 12.6754084471 | 2.4359734220 |
| C4 | 9.9599401614  | 12.6127390747 | 2.7945381120 |
| C5 | 9.0379810558  | 12.9467837813 | 3.6932950470 |
| H6 | 10.6826441706 | 15.2605832714 | 5.8865837283 |

|      |               |               |               |
|------|---------------|---------------|---------------|
| H7   | 11.5854274393 | 13.4431815641 | 1.7225645954  |
| C8   | 7.5940576577  | 12.5124528795 | 3.6147762252  |
| H9   | 7.4264358850  | 11.7983745555 | 2.8050424862  |
| H10  | 7.2799017355  | 12.0425752275 | 4.5547841637  |
| H11  | 6.9376749795  | 13.3776259152 | 3.4563394728  |
| C12  | 12.3278290334 | 11.7827773951 | 2.9107531360  |
| C13  | 13.6964268760 | 12.4359096683 | 3.1912178102  |
| C14  | 13.5860020142 | 11.5013484655 | 2.0462539950  |
| H15  | 12.0113768053 | 10.9907866963 | 3.5815823166  |
| H16  | 13.7640660734 | 13.5028204133 | 3.0061711557  |
| H17  | 14.1922389381 | 12.1072817654 | 4.0989143816  |
| H18  | 13.9613279986 | 10.4956914411 | 2.2255929984  |
| C19  | 13.9084833939 | 12.6336451032 | -2.0998800179 |
| C20  | 13.2551375428 | 11.4534938129 | -1.7321868691 |
| C21  | 13.1367155708 | 11.1091797990 | -0.3861655154 |
| C22  | 13.6763340724 | 11.9344915444 | 0.6147062238  |
| C23  | 14.3314048467 | 13.1123580084 | 0.2342400927  |
| C24  | 14.4435960266 | 13.4617601641 | -1.1139467562 |
| H25  | 14.0108808035 | 12.8973709513 | -3.1487549719 |
| H26  | 12.8470148668 | 10.7952867606 | -2.4938592859 |
| H27  | 12.6392813087 | 10.1830531386 | -0.1105389260 |
| H28  | 14.7813823273 | 13.7506371978 | 0.9891006858  |
| H29  | 14.9639586444 | 14.3740906659 | -1.3911619576 |
| C30  | 9.3575668420  | 13.8001799889 | 4.9088636872  |
| H31  | 8.5078264635  | 14.4707278778 | 5.1130009655  |
| H32  | 9.4038759002  | 13.1635440307 | 5.8077831127  |
| Au33 | 9.5289811040  | 11.5885487945 | 0.8860148196  |
| P34  | 8.7143554605  | 10.7108711382 | -1.1707030341 |
| C35  | 8.6881574392  | 14.0871163443 | -4.3328516592 |
| C36  | 9.7863170649  | 13.9142550835 | -3.4866686122 |
| C37  | 9.7798925274  | 12.9009221449 | -2.5306595663 |
| C38  | 8.6717229217  | 12.0435745176 | -2.4227132753 |
| C39  | 7.5712881547  | 12.2195138745 | -3.2739909759 |
| C40  | 7.5841912107  | 13.2412677049 | -4.2251051502 |
| H41  | 8.6924640325  | 14.8825359675 | -5.0724158409 |
| H42  | 10.6462257843 | 14.5728099495 | -3.5666769203 |
| H43  | 10.6386195016 | 12.7725638350 | -1.8768382810 |
| H44  | 6.7072335707  | 11.5674242320 | -3.1960840101 |
| H45  | 6.7286156542  | 13.3753511072 | -4.8803606049 |
| C46  | 4.3686163335  | 9.1669335345  | -0.7890268426 |
| C47  | 4.7717680178  | 10.3275798470 | -0.1235566055 |
| C48  | 6.0878456600  | 10.7730732283 | -0.2305434458 |
| C49  | 7.0122183196  | 10.0632907615 | -1.0147870185 |
| C50  | 6.6039373580  | 8.8983554687  | -1.6805266957 |
| C51  | 5.2852043284  | 8.4553890554  | -1.5640706325 |
| H52  | 3.3442131168  | 8.8181214944  | -0.7011414566 |
| H53  | 4.0620297019  | 10.8841221533 | 0.4812057517  |
| H54  | 6.3948079939  | 11.6784984410 | 0.2874020072  |
| H55  | 7.3082484219  | 8.3374582819  | -2.2864654719 |
| H56  | 4.9763451307  | 7.5520358895  | -2.0814658734 |



|     |               |               |               |
|-----|---------------|---------------|---------------|
| C57 | 11.2508986523 | 7.2402564972  | -2.8940084814 |
| C58 | 10.7730027400 | 8.2368748422  | -3.7464465150 |
| C59 | 10.0188426476 | 9.2965628838  | -3.2378999342 |
| C60 | 9.7392693612  | 9.3632975025  | -1.8642476364 |
| C61 | 10.2271633145 | 8.3615526583  | -1.0090450641 |
| C62 | 10.9754177948 | 7.3039618870  | -1.5252170042 |
| H63 | 11.8386182889 | 6.4191802699  | -3.2932423479 |
| H64 | 10.9853160733 | 8.1929247069  | -4.8107229565 |
| H65 | 9.6524158167  | 10.0668941805 | -3.9091211416 |
| H66 | 10.0209443026 | 8.4078800080  | 0.0576418361  |
| H67 | 11.3474607262 | 6.5317160018  | -0.8585724579 |

**Table S18.** Absolute energies and positional coordinates for **B3<sub>trans</sub>**.

Gas phase:

SCFE: -1828.00922919473 a.u.

ZPE: 327.262 kcal/mol

G<sub>STP</sub>: -1827.564281 a.u.

Dichloromethane:

SCFE: -1828.06713255665 a.u.

G<sub>STP</sub>: -1827.622184 a.u.

Nitromethane:

SCFE: -1828.07396749401 a.u.

G<sub>STP</sub>: -1827.629019 a.u.

|      |               |               |              |
|------|---------------|---------------|--------------|
| C1   | -4.1824925589 | 6.2285287007  | 6.9976461800 |
| O2   | -4.1158402960 | 6.0653771709  | 5.8000393333 |
| C3   | -7.1221690756 | 4.4981762867  | 6.7990694181 |
| C4   | -5.8844905879 | 4.3486984071  | 7.2428921093 |
| H5   | -3.5115905606 | 6.9438954227  | 7.5189453631 |
| C6   | -5.0762936647 | 3.0790934129  | 7.1375418376 |
| H7   | -5.6244232017 | 2.2793255121  | 6.6349664206 |
| H8   | -4.1565795909 | 3.2752869230  | 6.5746785862 |
| H9   | -4.7833340915 | 2.7238704459  | 8.1326156230 |
| C10  | -5.1827619294 | 5.5226559616  | 7.9056474207 |
| H11  | -5.8954630438 | 6.2864435963  | 8.2438282748 |
| H12  | -4.6503553080 | 5.1896067421  | 8.8076558407 |
| Au13 | -8.3817552631 | 2.7499783596  | 6.0221170261 |
| P14  | -9.3731181445 | 0.7233204191  | 5.3068817892 |
| C15  | -8.6146871185 | -2.7634072181 | 8.2502703836 |
| C16  | -8.7738952224 | -1.4593708642 | 8.7259173486 |
| C17  | -8.9815918333 | -0.4096512655 | 7.8325844488 |
| C18  | -9.0401432265 | -0.6609489517 | 6.4520318645 |
| C19  | -8.8770016658 | -1.9715915859 | 5.9775726207 |
| C20  | -8.6647380666 | -3.0159976389 | 6.8783220680 |
| H21  | -8.4473577467 | -3.5791586562 | 8.9470496801 |
| H22  | -8.7314553717 | -1.2584093235 | 9.7921904667 |
| H23  | -9.0995494774 | 0.6035432236  | 8.2087140518 |

|     |                |               |               |
|-----|----------------|---------------|---------------|
| H24 | -8.9113361540  | -2.1785677942 | 4.9125855058  |
| H25 | -8.5365448887  | -4.0276580150 | 6.5050983694  |
| C26 | -7.8334837997  | -0.6073133137 | 1.1507323861  |
| C27 | -6.9634326447  | -0.0145720336 | 2.0697611874  |
| C28 | -7.4372317660  | 0.4027645367  | 3.3127934615  |
| C29 | -8.7890402592  | 0.2231666533  | 3.6491725208  |
| C30 | -9.6605962949  | -0.3685206723 | 2.7218391036  |
| C31 | -9.1792569920  | -0.7812396099 | 1.4782877994  |
| H32 | -7.4638718199  | -0.9279944743 | 0.1813895630  |
| H33 | -5.9169742098  | 0.1272030067  | 1.8168314058  |
| H34 | -6.7559362735  | 0.8689292933  | 4.0203907777  |
| H35 | -10.7099795463 | -0.5032972483 | 2.9645871131  |
| H36 | -9.8594363681  | -1.2378678252 | 0.7653619119  |
| C37 | -13.9472855740 | 1.3140690536  | 4.9483899696  |
| C38 | -13.4512125589 | 0.2181724201  | 5.6549446774  |
| C39 | -12.0735329568 | 0.0238048757  | 5.7787460703  |
| C40 | -11.1852094237 | 0.9350417319  | 5.1912321188  |
| C41 | -11.6869411632 | 2.0422632226  | 4.4847488338  |
| C42 | -13.0627212959 | 2.2242744356  | 4.3618533556  |
| H43 | -15.0191538281 | 1.4610425993  | 4.8554472619  |
| H44 | -14.1349274286 | -0.4906940245 | 6.1124796753  |
| H45 | -11.6976300635 | -0.8326967440 | 6.3291381629  |
| H46 | -11.0068475825 | 2.7538512102  | 4.0220121066  |
| H47 | -13.4444029136 | 3.0782012246  | 3.8101520510  |
| C48 | -8.2675777049  | 5.1686210431  | 6.4885176776  |
| H49 | -9.0682070162  | 5.1680427317  | 7.2329932490  |
| C50 | -8.5352277220  | 5.9590770661  | 5.2716442022  |
| C51 | -7.4396986122  | 6.7690640405  | 4.5791285119  |
| C52 | -7.9645931299  | 5.5584051728  | 3.8891389017  |
| H53 | -9.5361325828  | 6.3778156243  | 5.2342323196  |
| H54 | -7.7232746481  | 7.7525329396  | 4.2175457984  |
| H55 | -6.4375071200  | 6.7005654336  | 4.9892132928  |
| H56 | -7.3076225492  | 4.6918071218  | 3.9444019358  |
| C57 | -10.5505668627 | 5.4564189640  | 0.4487381516  |
| C58 | -10.4432568178 | 6.6320859191  | 1.1940861309  |
| C59 | -9.6023283895  | 6.6882261082  | 2.3046849235  |
| C60 | -8.8556840500  | 5.5666365912  | 2.6927538651  |
| C61 | -8.9691000595  | 4.3909302691  | 1.9344664736  |
| C62 | -9.8081955390  | 4.3355848027  | 0.8215118608  |
| H63 | -11.2020573991 | 5.4178011342  | -0.4193776752 |
| H64 | -11.0114437440 | 7.5119000348  | 0.9060689579  |
| H65 | -9.5285797225  | 7.6173879473  | 2.8631616778  |
| H66 | -8.3864142389  | 3.5157032040  | 2.2139778612  |
| H67 | -9.8761259240  | 3.4183171057  | 0.2432485222  |

**Table S19.** Absolute energies and positional coordinates for **Bts4**.

Gas phase:

SCFE: -1828.000389 a.u.

ZPE: 326.744 kcal/mol

G<sub>STP</sub>: -1827.552886 a.u.  
Imaginary frequencies: -54 cm<sup>-1</sup>

Dichloromethane:  
SCFE: -1828.059882 a.u.  
G<sub>STP</sub>: -1827.612380 a.u.

|      |                   |                   |                   |
|------|-------------------|-------------------|-------------------|
| C1   | 0.000000000000000 | 0.000000000000000 | 0.000000000000000 |
| O2   | 0.000000000000000 | 0.000000000000000 | 1.2075371811640   |
| C3   | 3.9254855000828   | 0.000000000000000 | -0.2024968171219  |
| C4   | 3.1739577688206   | -1.0544065592166  | 0.2902816733327   |
| C5   | 1.9869492965607   | -1.5927224607296  | -0.0760127646431  |
| H6   | -0.7521075640435  | 0.5770208145406   | -0.5794580525692  |
| H7   | 4.1841079064247   | -0.0144729374953  | -1.2670869121354  |
| C8   | 1.4748012557091   | -2.9295569789308  | 0.3780109392049   |
| H9   | 2.2464772545663   | -3.5264035173824  | 0.8674273917752   |
| H10  | 0.6492868126615   | -2.7894758451856  | 1.0872498882858   |
| H11  | 1.0752596823716   | -3.4920047545027  | -0.4745960906042  |
| C12  | 4.4910764177352   | 1.0881968600406   | 0.5456312703781   |
| C13  | 4.5953510545974   | 2.4571285878494   | -0.1689799535561  |
| C14  | 5.8564285074183   | 1.7389067082767   | 0.0867554036084   |
| H15  | 4.2913235997712   | 1.1090358250023   | 1.6120796673932   |
| H16  | 4.2097142397835   | 2.5110210995961   | -1.1818551522541  |
| H17  | 4.3359752582965   | 3.3090242405249   | 0.4516184716924   |
| H18  | 6.4159503845420   | 2.0636352155466   | 0.9617004477626   |
| C19  | 8.3173529867075   | -0.1343546580743  | -2.9087171256711  |
| C20  | 8.5110079417635   | -0.4025182560286  | -1.5510335766846  |
| C21  | 7.7064924290462   | 0.2133857697532   | -0.5953371008722  |
| C22  | 6.6947353107385   | 1.1092230887278   | -0.9790042941445  |
| C23  | 6.5192393528791   | 1.3824984760914   | -2.3419391110133  |
| C24  | 7.3238417445873   | 0.7617149604066   | -3.3000216328660  |
| H25  | 8.9459826613489   | -0.6118083186980  | -3.6545057361740  |
| H26  | 9.2963945382855   | -1.0850222449879  | -1.2384815326732  |
| H27  | 7.8672591532366   | 0.0108734765301   | 0.4612815502204   |
| H28  | 5.7723759454470   | 2.1023643175778   | -2.6640736123916  |
| H29  | 7.1798318154982   | 0.9896005464914   | -4.3520728402496  |
| C30  | 1.0039578547270   | -0.7620736307482  | -0.8672437348201  |
| H31  | 1.5148741787696   | -0.0131852927289  | -1.4899386423534  |
| H32  | 0.4196953762179   | -1.3918116524312  | -1.5538925232029  |
| Au33 | 4.3849357667594   | -2.0115955766814  | 1.7994853643909   |
| P34  | 5.4874354206805   | -3.3430654074733  | 3.4256084848944   |
| C35  | 8.8366723969195   | -5.9233346124642  | 1.5456724303375   |
| C36  | 8.5749645022131   | -4.6420928131692  | 1.0564834673837   |
| C37  | 7.5577082343246   | -3.8733256695385  | 1.6194645163451   |
| C38  | 6.7985345079372   | -4.3816831859988  | 2.6851660458915   |
| C39  | 7.0629689537165   | -5.6717830627800  | 3.1714891110206   |
| C40  | 8.0806982133871   | -6.4362490894354  | 2.6007847964890   |
| H41  | 9.6238725823521   | -6.5244268464142  | 1.1000984694142   |
| H42  | 9.1564592283287   | -4.2460704813396  | 0.2292061210916   |
| H43  | 7.3456570579178   | -2.8831427988368  | 1.2240708037670   |

|     |                 |                  |                 |
|-----|-----------------|------------------|-----------------|
| H44 | 6.4723687226188 | -6.0824974622144 | 3.9845116787510 |
| H45 | 8.2782348552819 | -7.4352021843233 | 2.9782191696599 |
| C46 | 2.4449856743421 | -6.3201847218312 | 5.2540906457825 |
| C47 | 2.5684318845877 | -6.1835161888711 | 3.8684279658848 |
| C48 | 3.4817809659273 | -5.2775423023492 | 3.3345921135229 |
| C49 | 4.2893292451751 | -4.5025206560248 | 4.1844929040800 |
| C50 | 4.1651622667553 | -4.6447647965633 | 5.5731429369459 |
| C51 | 3.2429770322586 | -5.5515123928865 | 6.1013221478505 |
| H52 | 1.7289421232262 | -7.0227629136000 | 5.6695323000326 |
| H53 | 1.9514164409480 | -6.7815494836867 | 3.2042631273759 |
| H54 | 3.5768732240959 | -5.1815147702470 | 2.2557379986140 |
| H55 | 4.7810735256494 | -4.0529003492112 | 6.2424020615940 |
| H56 | 3.1515877418124 | -5.6550979574080 | 7.1784543057747 |
| C57 | 7.2872891423185 | -0.9234489643534 | 6.9362400914260 |
| C58 | 7.9837062604650 | -2.0215469066421 | 6.4290527621107 |
| C59 | 7.4641922798400 | -2.7520184855846 | 5.3591328266743 |
| C60 | 6.2373462795671 | -2.3811234554346 | 4.7885773122835 |
| C61 | 5.5449427374693 | -1.2682752762741 | 5.2939949315311 |
| C62 | 6.0673648947632 | -0.5482100094085 | 6.3672959160430 |
| H63 | 7.6950949097101 | -0.3591630603672 | 7.7694896250323 |
| H64 | 8.9343173681945 | -2.3135944442784 | 6.8654980575012 |
| H65 | 8.0131085818818 | -3.6053966005814 | 4.9736131324679 |
| H66 | 4.5966746669206 | -0.9704701314490 | 4.8530622781456 |
| H67 | 5.5239667730026 | 0.3071953565749  | 6.7574498837195 |

**Table S20.** Absolute energies and positional coordinates for **B4**.

Gas phase:

SCFE: -1828.003239 a.u.

ZPE: 327.071 kcal/mol

G<sub>STP</sub>: -1827.556732 a.u.

Dichloromethane:

SCFE: -1828.062668 a.u.

G<sub>STP</sub>: -1827.616160 a.u.

|     |                  |                  |                  |
|-----|------------------|------------------|------------------|
| C1  | 0.0000000000000  | 0.0000000000000  | 0.0000000000000  |
| O2  | 0.0000000000000  | 0.0000000000000  | 1.2061268337290  |
| C3  | 3.7664464980192  | 0.0000000000000  | -0.2126178913200 |
| C4  | 3.1496490329062  | -1.0920785209697 | 0.3954284040431  |
| C5  | 1.9534301492612  | -1.6136396588058 | -0.0733324053737 |
| H6  | -0.7398553996419 | 0.5867095350856  | -0.5838267617139 |
| H7  | 3.5771267365912  | 0.1809603753607  | -1.2742825160135 |
| C8  | 1.4377669225089  | -2.9543724030248 | 0.3403986176707  |
| H9  | 2.2160160930617  | -3.5773865426902 | 0.7852227155588  |
| H10 | 0.6400218036578  | -2.8185380212743 | 1.0853949066195  |
| H11 | 0.9847582726437  | -3.4746823196438 | -0.5118768019081 |
| C12 | 4.7403162129284  | 0.8615731691046  | 0.3759114880874  |
| C13 | 4.9157640810525  | 2.2957551110673  | -0.1710698403220 |
| C14 | 5.9828596725370  | 1.3460313132556  | -0.5136464571422 |

|      |                  |                  |                  |
|------|------------------|------------------|------------------|
| H15  | 4.9661667068431  | 0.7053121265830  | 1.4255163205238  |
| H16  | 4.2187012449752  | 2.6060030539919  | -0.9424717784334 |
| H17  | 5.0979818320112  | 3.0455917716499  | 0.5926187448016  |
| H18  | 6.8691267068168  | 1.3742774549155  | 0.1168643082879  |
| C19  | 6.6489660989392  | -0.3411173797312 | -4.4104142610360 |
| C20  | 7.1956872164092  | -0.9388546724015 | -3.2711585572180 |
| C21  | 6.9779145863480  | -0.3758308854254 | -2.0168824320049 |
| C22  | 6.2064542663492  | 0.7896979299855  | -1.8792700301970 |
| C23  | 5.6740524654876  | 1.3889615310914  | -3.0277407225960 |
| C24  | 5.8942201254793  | 0.8251472951312  | -4.2859670841372 |
| H25  | 6.8195996464155  | -0.7783066158153 | -5.3899449532032 |
| H26  | 7.7923744261043  | -1.8418497904735 | -3.3627819077712 |
| H27  | 7.4039650415043  | -0.8441830922229 | -1.1326701822632 |
| H28  | 5.1061317475342  | 2.3116005857061  | -2.9497429881986 |
| H29  | 5.4825904637221  | 1.3040523100011  | -5.1696073653419 |
| C30  | 0.9927441680483  | -0.7823768686061 | -0.8766447787680 |
| H31  | 1.5045796756476  | -0.0315976756229 | -1.4952684271683 |
| H32  | 0.3931793104490  | -1.4021279759093 | -1.5574542188999 |
| Au33 | 4.0105942735854  | -1.8755628478161 | 2.1544389927777  |
| P34  | 4.7406056369161  | -2.5948108790224 | 4.3019174396081  |
| C35  | 9.3040672479378  | -3.0121537620340 | 4.9780485237898  |
| C36  | 8.8084117066346  | -2.0837188678084 | 4.0602459683387  |
| C37  | 7.4348497448277  | -1.9754802979907 | 3.8458320233901  |
| C38  | 6.5420774970676  | -2.7919218776415 | 4.5570182842738  |
| C39  | 7.0463465041517  | -3.7296615448187 | 5.4729982390839  |
| C40  | 8.4218669874138  | -3.8347525736469 | 5.6805471248746  |
| H41  | 10.3740889840354 | -3.0994024994235 | 5.1397532630043  |
| H42  | 9.4925100587373  | -1.4481449924535 | 3.5058827936934  |
| H43  | 7.0526954790487  | -1.2591175892947 | 3.1230496154709  |
| H44  | 6.3692927048378  | -4.3803075237694 | 6.0181474026132  |
| H45  | 8.8030032749504  | -4.5639119928528 | 6.3893762773122  |
| C46  | 2.9479865767626  | -6.7341516389239 | 5.3232766849859  |
| C47  | 3.5504964416219  | -6.5029755848973 | 4.0841240541390  |
| C48  | 4.0683851429981  | -5.2451426567147 | 3.7851032848950  |
| C49  | 3.9970689650801  | -4.2096403745920 | 4.7319747937859  |
| C50  | 3.3882353368027  | -4.4438674309198 | 5.9723339634282  |
| C51  | 2.8651057350077  | -5.7056554847879 | 6.2622889194022  |
| H52  | 2.5400704558725  | -7.7137276724156 | 5.5543112252758  |
| H53  | 3.6130839828668  | -7.3014050669086 | 3.3506768435512  |
| H54  | 4.5327724378438  | -5.0672547940836 | 2.8179358126202  |
| H55  | 3.3203238547631  | -3.6480622772453 | 6.7077304460401  |
| H56  | 2.3931039945006  | -5.8823354663166 | 7.2243063701164  |
| C57  | 3.1669874567412  | 0.5134509339950  | 7.3592358984852  |
| C58  | 4.4337041543136  | -0.0424295156151 | 7.5410334424244  |
| C59  | 4.9273777283300  | -0.9852519110270 | 6.6372115816485  |
| C60  | 4.1495099336843  | -1.3773088946689 | 5.5379621258622  |
| C61  | 2.8758436931172  | -0.8095938109659 | 5.3565577627460  |
| C62  | 2.3876100691169  | 0.1259975139824  | 6.2667088004757  |
| H63  | 2.7895546724841  | 1.2484933744086  | 8.0634810652628  |
| H64  | 5.0441768047946  | 0.2577144265842  | 8.3875071210784  |

|     |                 |                  |                 |
|-----|-----------------|------------------|-----------------|
| H65 | 5.9159890295544 | -1.4077433705466 | 6.7871648565278 |
| H66 | 2.2678172198761 | -1.0959600378959 | 4.5018437688555 |
| H67 | 1.4020001884608 | 0.5566080262693  | 6.1173789415290 |

**Table S21.** Absolute energies and positional coordinates for **Bts5**.

Gas phase:

SCFE: -1827.97892136479 a.u.

ZPE: 326.503 kcal/mol

G<sub>STP</sub>: -1827.533699 a.u.

Imaginary frequencies: -76 cm<sup>-1</sup>

Dichloromethane:

SCFE: -1828.04282606346 a.u.

G<sub>STP</sub>: -1827.597604 a.u.

Nitromethane:

SCFE: -1828.05103804151 a.u.

G<sub>STP</sub>: -1827.605816 a.u.

|      |               |               |               |
|------|---------------|---------------|---------------|
| C1   | 8.9532028717  | 16.0395697791 | 3.8452830736  |
| O2   | 8.5266658111  | 16.4887505342 | 2.8079742275  |
| C3   | 11.1224470606 | 13.0835278946 | 2.3461436345  |
| C4   | 9.6765846124  | 13.0419759077 | 2.1785911693  |
| C5   | 8.7786279690  | 13.6379190690 | 2.9984847316  |
| H6   | 11.6526273367 | 13.8556855208 | 1.7814698555  |
| C7   | 7.2866026546  | 13.5146828874 | 2.8242066420  |
| H8   | 7.0275320445  | 12.8134043287 | 2.0274014239  |
| H9   | 6.8128064081  | 13.1784008614 | 3.7573823835  |
| H10  | 6.8512051373  | 14.4904352610 | 2.5785557615  |
| C11  | 11.9013127777 | 12.1945631063 | 3.0062354914  |
| C12  | 11.3647858612 | 10.9409943810 | 3.6862123429  |
| C13  | 10.5370355614 | 11.3872167970 | 4.8191386036  |
| H14  | 12.9766890005 | 12.3438026606 | 3.0370323716  |
| H15  | 10.8297810975 | 10.2898879653 | 2.9889805072  |
| H16  | 12.2162013544 | 10.3749621215 | 4.0917091625  |
| H17  | 11.0462331077 | 12.0628963840 | 5.5058306356  |
| C18  | 6.7292118110  | 10.1781080473 | 6.1400009489  |
| C19  | 7.4824010304  | 11.0863320004 | 6.8932785783  |
| C20  | 8.7146145647  | 11.5092632151 | 6.4215116374  |
| C21  | 9.2245699217  | 11.0226354883 | 5.1816803486  |
| C22  | 8.4307490524  | 10.1117845069 | 4.4265021168  |
| C23  | 7.2062643784  | 9.6935106335  | 4.9095345536  |
| H24  | 5.7607579828  | 9.8491092187  | 6.5058076662  |
| H25  | 7.1033558950  | 11.4550555137 | 7.8408298909  |
| H26  | 9.3158800939  | 12.2011935869 | 7.0048333607  |
| H27  | 8.7824008292  | 9.7647944324  | 3.4619383415  |
| H28  | 6.6030820675  | 8.9975886321  | 4.3353817447  |
| Au29 | 9.1921885499  | 12.0998658459 | 0.3778207537  |
| P30  | 8.6747527004  | 11.0016170029 | -1.6967713149 |

|     |               |               |               |
|-----|---------------|---------------|---------------|
| C31 | 4.4983689560  | 12.1558136259 | -3.3428583176 |
| C32 | 5.3037231617  | 13.1036290936 | -2.7067835729 |
| C33 | 6.5481066967  | 12.7362350389 | -2.1962754646 |
| C34 | 7.0042900621  | 11.4143274718 | -2.3281902299 |
| C35 | 6.1894493047  | 10.4646158675 | -2.9633613302 |
| C36 | 4.9417883551  | 10.8380464094 | -3.4664571751 |
| H37 | 3.5278403948  | 12.4425686738 | -3.7369493076 |
| H38 | 4.9617605951  | 14.1293187844 | -2.6040464554 |
| H39 | 7.1661498648  | 13.4776307460 | -1.6958292080 |
| H40 | 6.5239284948  | 9.4368532725  | -3.0654828760 |
| H41 | 4.3172688150  | 10.0965374216 | -3.9563912328 |
| C42 | 8.6935656360  | 6.3877377771  | -1.1968606299 |
| C43 | 8.1072383535  | 7.2108329499  | -0.2317231891 |
| C44 | 8.1226955997  | 8.5952128255  | -0.3895663778 |
| C45 | 8.7130098998  | 9.1735383758  | -1.5252635954 |
| C46 | 9.2998671698  | 8.3435801109  | -2.4904045562 |
| C47 | 9.2901542022  | 6.9569324263  | -2.3220080656 |
| H48 | 8.6861754045  | 5.3092173745  | -1.0705843823 |
| H49 | 7.6392126062  | 6.7715332844  | 0.6448430780  |
| H50 | 7.6676554475  | 9.2331957464  | 0.3645556114  |
| H51 | 9.7664754853  | 8.7751374385  | -3.3703587655 |
| H52 | 9.7494841005  | 6.3227081743  | -3.0746229102 |
| C53 | 11.7104183080 | 11.9887605554 | -5.0589899763 |
| C54 | 10.3620205030 | 11.8201686133 | -5.3784685132 |
| C55 | 9.4317764116  | 11.5343044819 | -4.3777796370 |
| C56 | 9.8492598877  | 11.4142395729 | -3.0430777520 |
| C57 | 11.2050815939 | 11.5965280616 | -2.7266863968 |
| C58 | 12.1296996840 | 11.8767471853 | -3.7314073290 |
| H59 | 12.4305834489 | 12.2135660953 | -5.8400574905 |
| H60 | 10.0299610744 | 11.9133313449 | -6.4084053050 |
| H61 | 8.3850405616  | 11.4097337421 | -4.6372010990 |
| H62 | 11.5352344647 | 11.5211381463 | -1.6937164719 |
| H63 | 13.1762792086 | 12.0154765181 | -3.4766634350 |
| H64 | 9.2157234725  | 16.7094662531 | 4.6946849248  |
| C65 | 9.1967372436  | 14.5600608090 | 4.1257246588  |
| H66 | 10.2640838980 | 14.4651794897 | 4.3658272116  |
| H67 | 8.6525511797  | 14.3276540262 | 5.0567106791  |

**Table S22.** Absolute energies and positional coordinates for **B5**.

Gas phase:

SCFE: -1828.06470862792 a.u.

ZPE: 328.813 kcal/mol

G<sub>STP</sub>: -1827.614581 a.u.

Dichloromethane:

SCFE: -1828.12111494222 a.u.

G<sub>STP</sub>: -1827.670987 a.u.

Nitromethane:

SCFE: -1828.12769417307 a.u.

G<sub>STP</sub>: -1827.677566 a.u.

|      |               |               |               |
|------|---------------|---------------|---------------|
| C1   | 1.7416772306  | -1.4155645166 | 3.4731494421  |
| C2   | 0.9539243098  | -1.0966235213 | 2.4288376190  |
| C3   | 1.5815251344  | -0.0632479997 | 1.5972874966  |
| H4   | 1.4944873540  | -2.1596502250 | 4.2241379276  |
| H5   | -0.0043218269 | -1.5556112636 | 2.2148964158  |
| C6   | 1.0812429896  | 0.5129177416  | 0.4281577766  |
| C7   | -0.3609154911 | 0.2899375540  | -0.0054862578 |
| H8   | -0.8684881012 | -0.4872729899 | 0.5799609000  |
| H9   | -0.9347784050 | 1.2099828862  | 0.1875017241  |
| C10  | -0.5712163206 | -0.0803045146 | -1.4610930245 |
| O11  | 0.3012980932  | -0.4868876314 | -2.2014768665 |
| H12  | -1.6135439200 | 0.0200744648  | -1.8250069751 |
| C13  | 1.7197706417  | 1.7451689031  | -0.1887974921 |
| H14  | 2.7903858643  | 1.8143716655  | 0.0068951494  |
| H15  | 1.5693800073  | 1.7600265218  | -1.2710623020 |
| H16  | 1.2524860840  | 2.6458102397  | 0.2301957870  |
| C17  | 3.0311577363  | -0.6492117816 | 3.4773324878  |
| H18  | 3.8733367503  | -1.3183237989 | 3.2495871574  |
| H19  | 3.2461456141  | -0.1939401686 | 4.4494646435  |
| C20  | 2.8305894021  | 0.4250647045  | 2.3637056369  |
| H21  | 3.7027294988  | 0.4532636067  | 1.7063049544  |
| C22  | 2.3516805307  | 4.4042206381  | 4.0236741119  |
| C23  | 1.3383887605  | 3.4576938965  | 4.1835500085  |
| C24  | 1.4788267197  | 2.1794768483  | 3.6440425554  |
| C25  | 2.6352057560  | 1.8284752259  | 2.9318890234  |
| C26  | 3.6452233477  | 2.7856661487  | 2.7777692730  |
| C27  | 3.5072121342  | 4.0640349050  | 3.3210461551  |
| H28  | 2.2409068093  | 5.3989375546  | 4.4447944128  |
| H29  | 0.4359798023  | 3.7137048227  | 4.7313866650  |
| H30  | 0.6836746200  | 1.4526041473  | 3.7852764705  |
| H31  | 4.5512379188  | 2.5294738270  | 2.2323795842  |
| H32  | 4.3029325964  | 4.7922862220  | 3.1934098402  |
| Au33 | 2.3964320578  | -1.3003786232 | -0.3691479927 |
| P34  | 3.7914242688  | -2.9358238134 | -1.3250749625 |
| C35  | 1.8678980729  | -7.1455452955 | -1.3443207556 |
| C36  | 1.6401383259  | -6.2691697375 | -0.2801605010 |
| C37  | 2.2054389586  | -4.9949632309 | -0.2896974260 |
| C38  | 3.0142622604  | -4.5906148048 | -1.3643368760 |
| C39  | 3.2363027929  | -5.4715280356 | -2.4336511113 |
| C40  | 2.6626436995  | -6.7439290323 | -2.4188752854 |
| H41  | 1.4225070968  | -8.1357704301 | -1.3378914877 |
| H42  | 1.0174547631  | -6.5763735987 | 0.5548307277  |
| H43  | 2.0197124827  | -4.3142707775 | 0.5375620795  |
| H44  | 3.8507635306  | -5.1682686261 | -3.2754172374 |
| H45  | 2.8371055055  | -7.4195511540 | -3.2509092904 |
| C46  | 7.7203507043  | -3.2358450882 | 1.1134420721  |



|     |              |               |               |
|-----|--------------|---------------|---------------|
| C47 | 7.2187665373 | -1.9918960087 | 0.7184668858  |
| C48 | 6.0311243964 | -1.9149648599 | -0.0055444632 |
| C49 | 5.3365865497 | -3.0866228326 | -0.3519679948 |
| C50 | 5.8429373116 | -4.3316612850 | 0.0449890049  |
| C51 | 7.0311538589 | -4.4006923226 | 0.7767808910  |
| H52 | 8.6433886091 | -3.2942093665 | 1.6823685252  |
| H53 | 7.7526681821 | -1.0819998247 | 0.9768812476  |
| H54 | 5.6454984374 | -0.9440898459 | -0.3079716171 |
| H55 | 5.3166622687 | -5.2449944995 | -0.2132548016 |
| H56 | 7.4163682906 | -5.3692044004 | 1.0816887409  |
| C57 | 4.9813033087 | -1.8969003981 | -5.6706974780 |
| C58 | 5.8965979384 | -2.5449166102 | -4.8389270887 |
| C59 | 5.5540563194 | -2.8503299358 | -3.5214590561 |
| C60 | 4.2843322110 | -2.5062956306 | -3.0298492377 |
| C61 | 3.3678593150 | -1.8476443598 | -3.8660320359 |
| C62 | 3.7194523325 | -1.5496917560 | -5.1825131187 |
| H63 | 5.2530646761 | -1.6575938614 | -6.6944399306 |
| H64 | 6.8811260962 | -2.8104416186 | -5.2125659659 |
| H65 | 6.2753799994 | -3.3467022612 | -2.8795159710 |
| H66 | 2.3875541746 | -1.5639300975 | -3.4918447331 |
| H67 | 3.0078520825 | -1.0395231560 | -5.8247898296 |

**Table S23.** Absolute energies and positional coordinates for **Bts6**.

Gas phase:

SCFE: -1827.96552955780 a.u.

ZPE: 325.707 kcal/mol

G<sub>STP</sub>: -1827.523503 a.u.

Imaginary frequencies: -125 cm<sup>-1</sup>

Dichloromethane:

SCFE: -1828.03720047530 a.u.

G<sub>STP</sub>: -1827.595174 a.u.

Nitromethane:

SCFE: -1828.04564961212 a.u.

G<sub>STP</sub>: -1827.603623 a.u.

|     |               |               |              |
|-----|---------------|---------------|--------------|
| C1  | 10.0259208282 | 14.5049240375 | 5.2055625345 |
| O2  | 10.1650951468 | 15.1702949964 | 4.2054082022 |
| C3  | 11.5809921372 | 12.5999466753 | 2.8421003741 |
| C4  | 10.1517863908 | 12.2652286181 | 2.8481184392 |
| C5  | 9.3530516488  | 12.3814926798 | 3.9363246725 |
| H6  | 10.0704719302 | 14.9779265364 | 6.2127640791 |
| H7  | 11.8598761972 | 13.4652473924 | 2.2324634216 |
| C8  | 7.8872915230  | 12.0287406607 | 3.9340488865 |
| H9  | 7.5752815856  | 11.5932936402 | 2.9818237159 |
| H10 | 7.6503505553  | 11.3160955085 | 4.7355002709 |
| H11 | 7.2731558016  | 12.9213397338 | 4.1198739269 |
| C12 | 12.5639655057 | 11.8898307900 | 3.4247313984 |

|      |               |               |               |
|------|---------------|---------------|---------------|
| C13  | 14.0303279175 | 12.1768038761 | 3.1871759015  |
| C14  | 14.6181688725 | 11.5111000116 | 2.0011654197  |
| H15  | 12.3287596002 | 11.0176647732 | 4.0323593118  |
| H16  | 14.1081075911 | 13.2578453994 | 2.9349520934  |
| H17  | 14.6604615369 | 12.0480369915 | 4.0756544530  |
| H18  | 13.8916378680 | 11.1672282901 | 1.2634965672  |
| C19  | 18.6221979491 | 10.7883277840 | 0.9688157289  |
| C20  | 17.5898893305 | 10.3994659777 | 0.1014958751  |
| C21  | 16.2776124109 | 10.6665241099 | 0.4437170913  |
| C22  | 15.9667320306 | 11.3238860764 | 1.6768798186  |
| C23  | 17.0395369995 | 11.7147155955 | 2.5386937201  |
| C24  | 18.3453838761 | 11.4464428292 | 2.1820267093  |
| H25  | 19.6537505142 | 10.5788674114 | 0.7001906412  |
| H26  | 17.8232109390 | 9.8946973524  | -0.8300201287 |
| H27  | 15.4651242239 | 10.3721093726 | -0.2148220159 |
| H28  | 16.8241506701 | 12.2236593773 | 3.4717264346  |
| H29  | 19.1611690957 | 11.7397757949 | 2.8342820322  |
| C30  | 9.8399954185  | 12.9911979655 | 5.2370888973  |
| H31  | 9.1700365534  | 12.7514298385 | 6.0719550444  |
| H32  | 10.8270391682 | 12.6004718771 | 5.5253378052  |
| Au33 | 9.5184115325  | 11.6210424506 | 0.9781275021  |
| P34  | 8.8205417876  | 10.8017332181 | -1.1743753255 |
| C35  | 9.4857338018  | 13.7912626410 | -4.6534947495 |
| C36  | 10.3073405957 | 13.8207380556 | -3.5254408188 |
| C37  | 10.0904623567 | 12.9237818975 | -2.4798579146 |
| C38  | 9.0532454167  | 11.9822876240 | -2.5588343292 |
| C39  | 8.2241265121  | 11.9650554694 | -3.6916170692 |
| C40  | 8.4437797191  | 12.8653915784 | -4.7335208246 |
| H41  | 9.6502181109  | 14.4948930800 | -5.4645384217 |
| H42  | 11.1092769421 | 14.5501847093 | -3.4545456515 |
| H43  | 10.7173281850 | 12.9607355754 | -1.5924631152 |
| H44  | 7.4034077254  | 11.2573618908 | -3.7567930746 |
| H45  | 7.7963230285  | 12.8476003778 | -5.6054629242 |
| C46  | 4.2825966428  | 9.8771207823  | -1.2472555965 |
| C47  | 4.7733794107  | 11.0152397137 | -0.6033180830 |
| C48  | 6.1441670192  | 11.2647065353 | -0.5739209415 |
| C49  | 7.0368877780  | 10.3803166081 | -1.2009467623 |
| C50  | 6.5395068890  | 9.2366539985  | -1.8414395613 |
| C51  | 5.1658250465  | 8.9888833883  | -1.8615666418 |
| H52  | 3.2142902105  | 9.6815958725  | -1.2659974747 |
| H53  | 4.0890960481  | 11.7065847620 | -0.1201069504 |
| H54  | 6.5226194410  | 12.1483803088 | -0.0660657262 |
| H55  | 7.2187038979  | 8.5390314367  | -2.3213297461 |
| H56  | 4.7869929530  | 8.1006760188  | -2.3589961956 |
| C57  | 10.9805154062 | 6.8470115498  | -2.2939710167 |
| C58  | 10.7577441603 | 7.8048818347  | -3.2841833174 |
| C59  | 10.1201022474 | 9.0076945339  | -2.9710913471 |
| C60  | 9.7020492715  | 9.2621764980  | -1.6569371488 |
| C61  | 9.9421958275  | 8.2998729155  | -0.6616335042 |

|     |               |              |               |
|-----|---------------|--------------|---------------|
| C62 | 10.5709456081 | 7.0975532568 | -0.9816769217 |
| H63 | 11.4696910167 | 5.9096706252 | -2.5426941243 |
| H64 | 11.0748491186 | 7.6164718885 | -4.3060682267 |
| H65 | 9.9478526417  | 9.7424596815 | -3.7514228984 |
| H66 | 9.6318522098  | 8.4921447720 | 0.3624864408  |
| H67 | 10.7402272066 | 6.3557685013 | -0.2062634386 |
