# Supplementary material
Source: PubMed Central journal article supplement (PMC2666792)

## 4. Selected spectral data

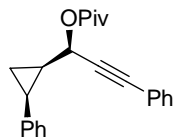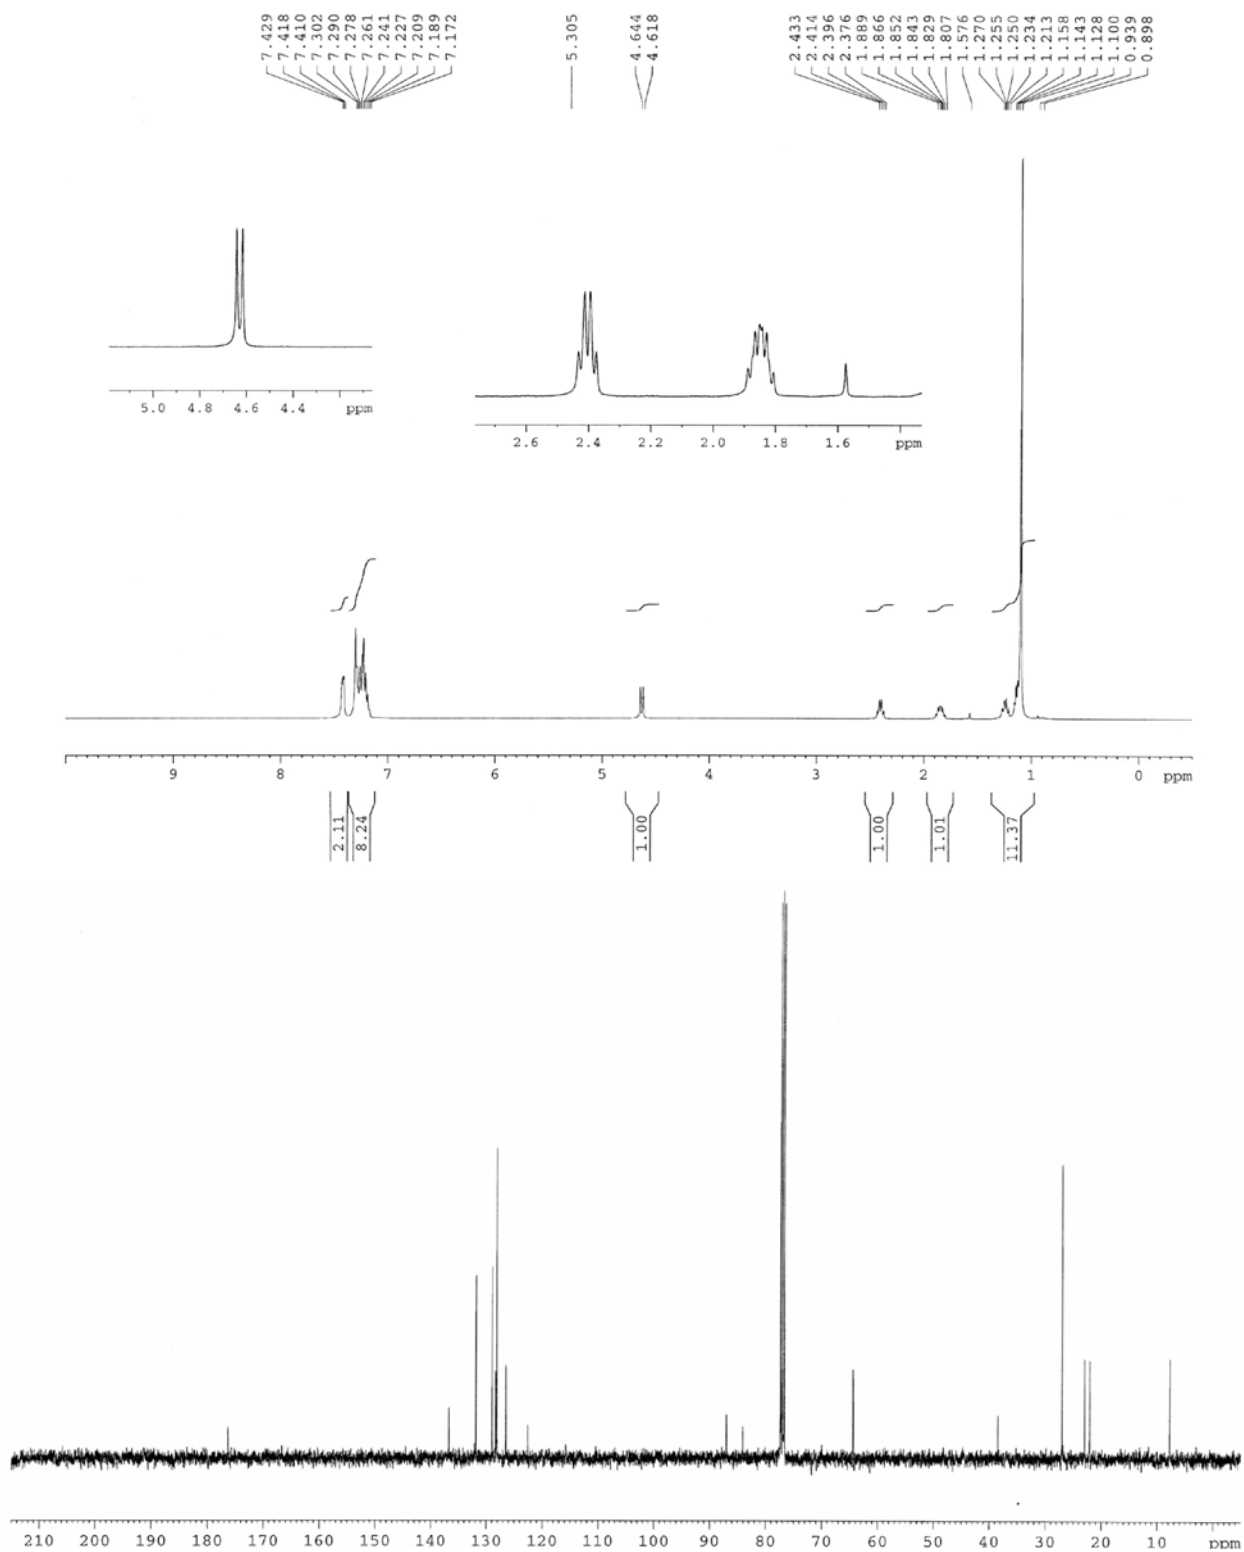

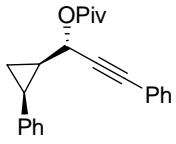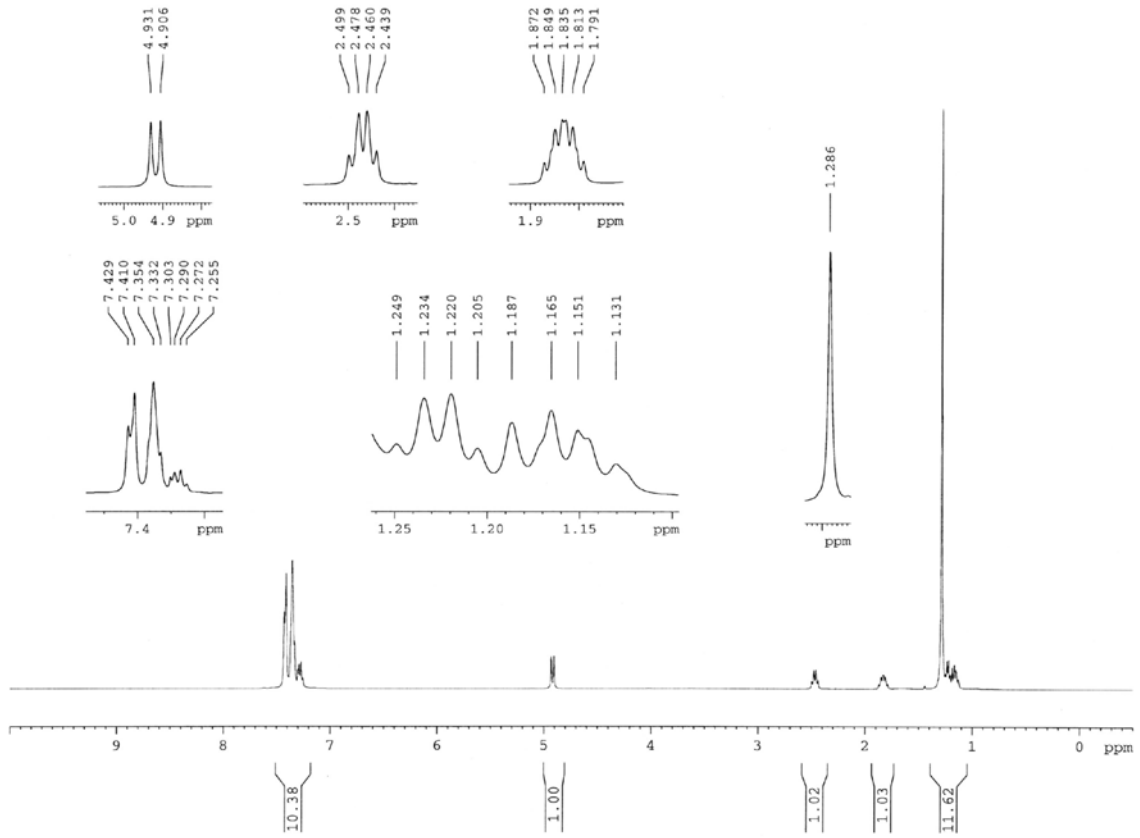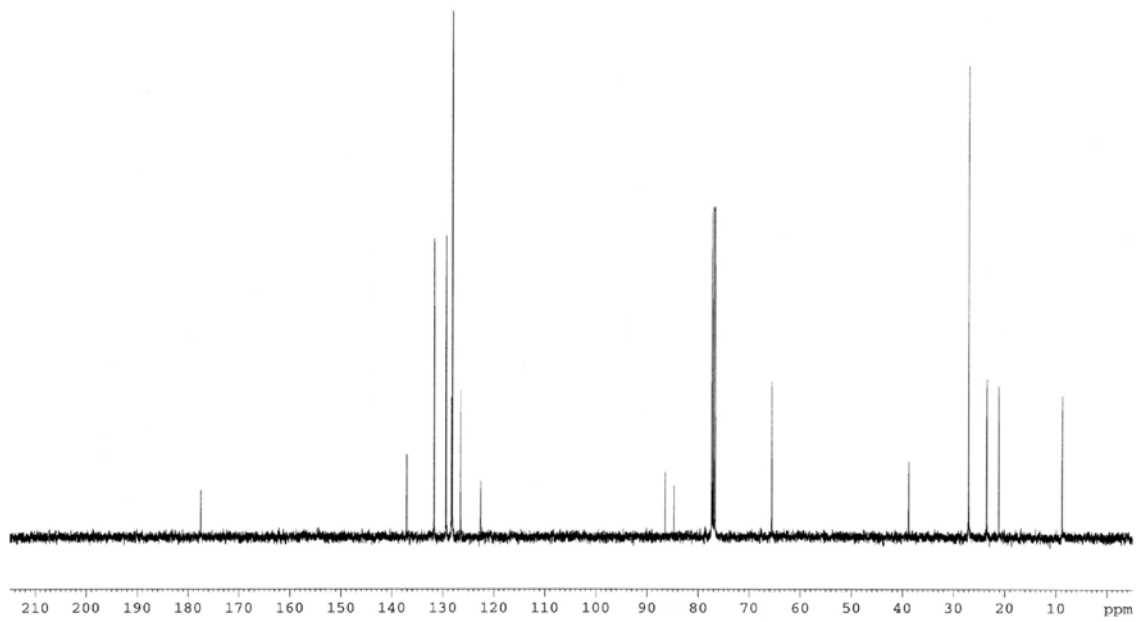

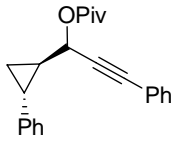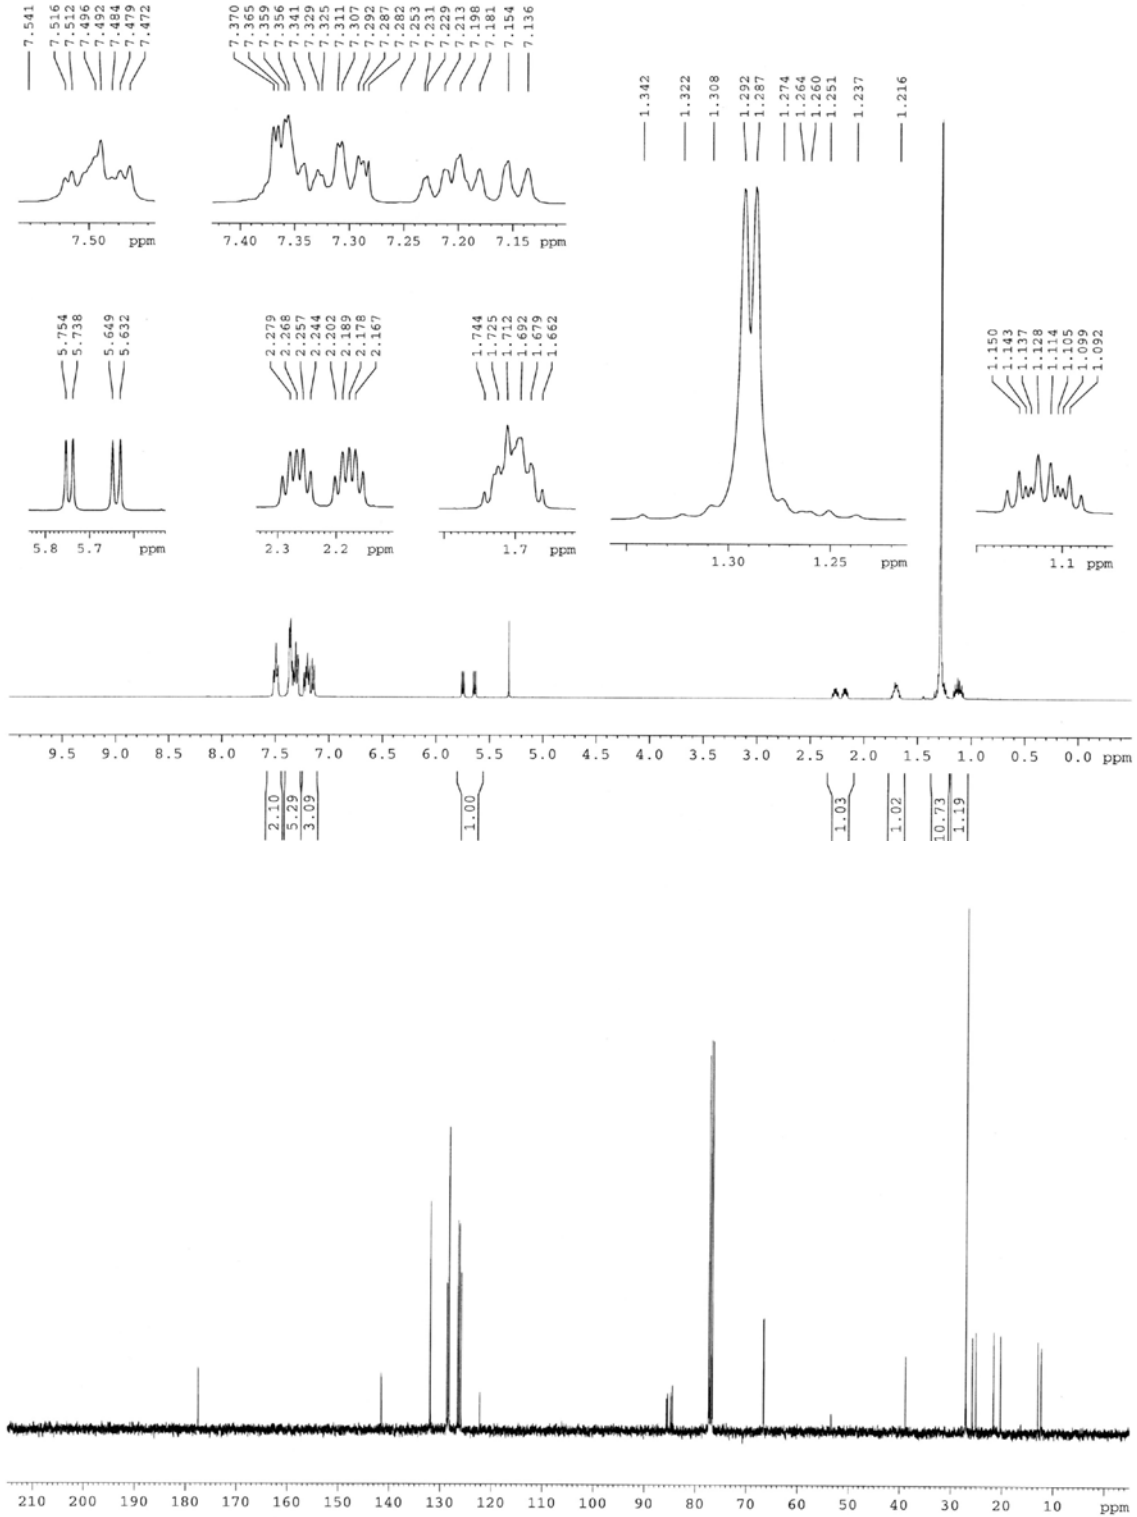

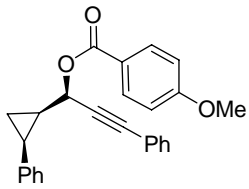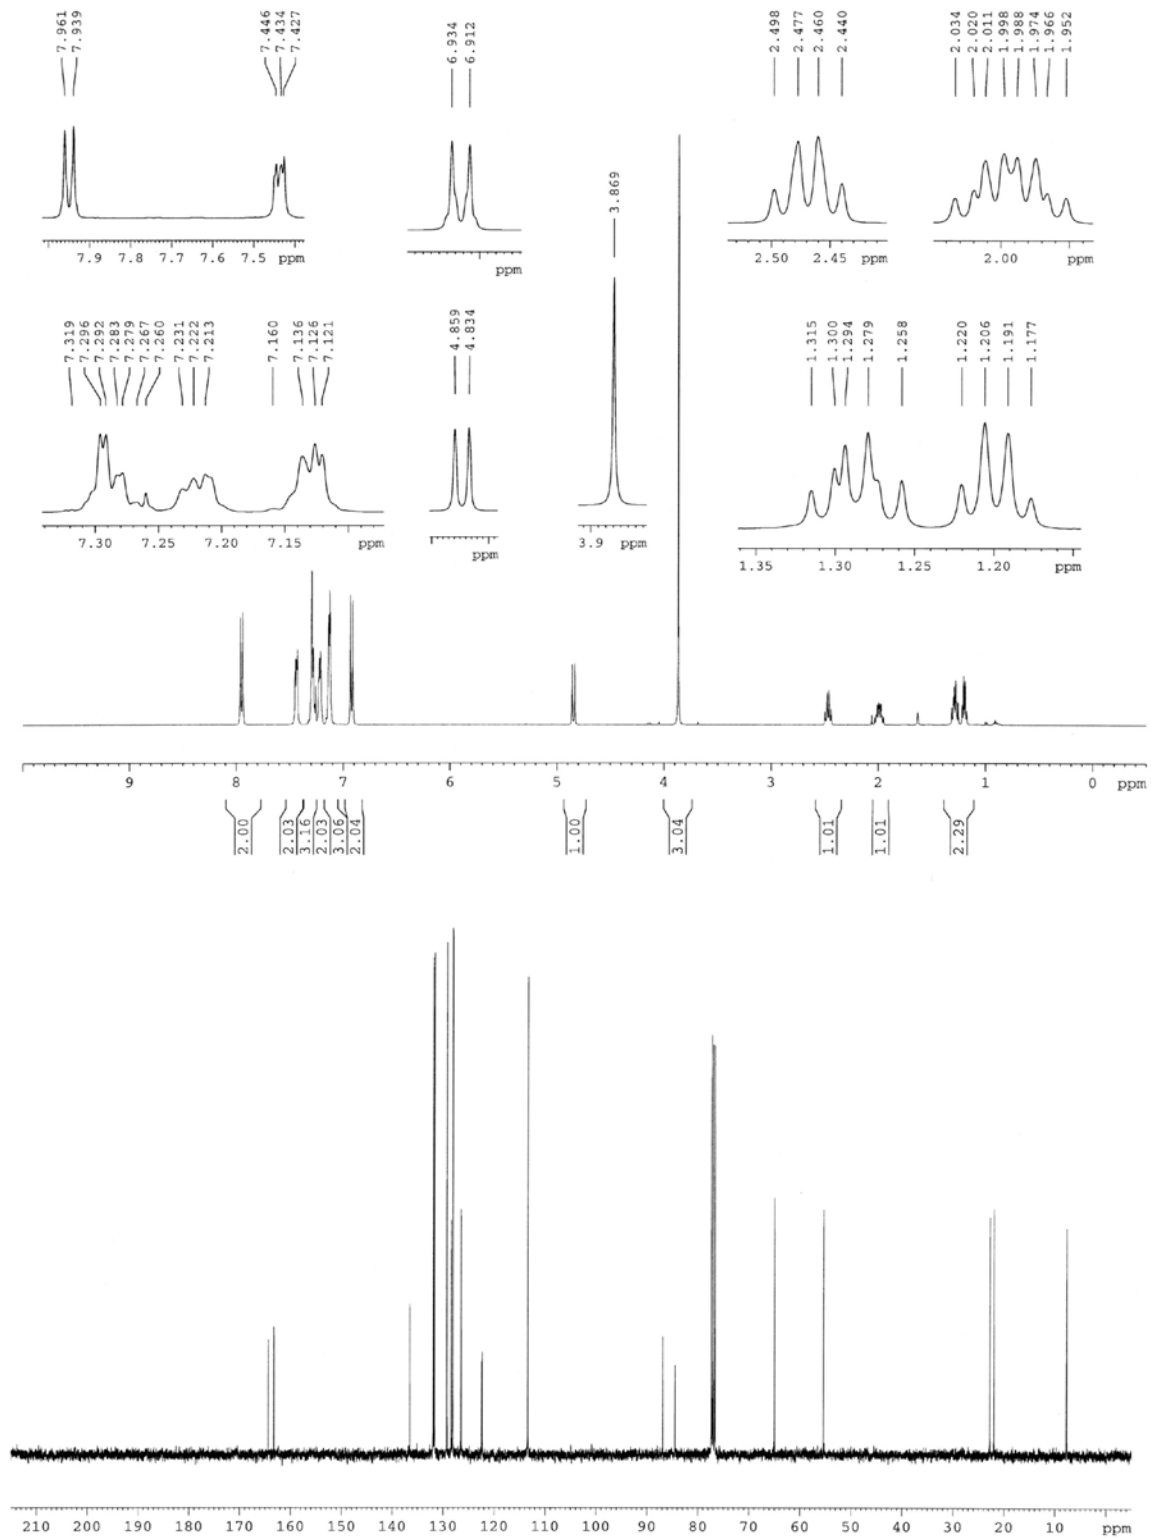

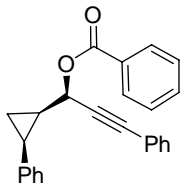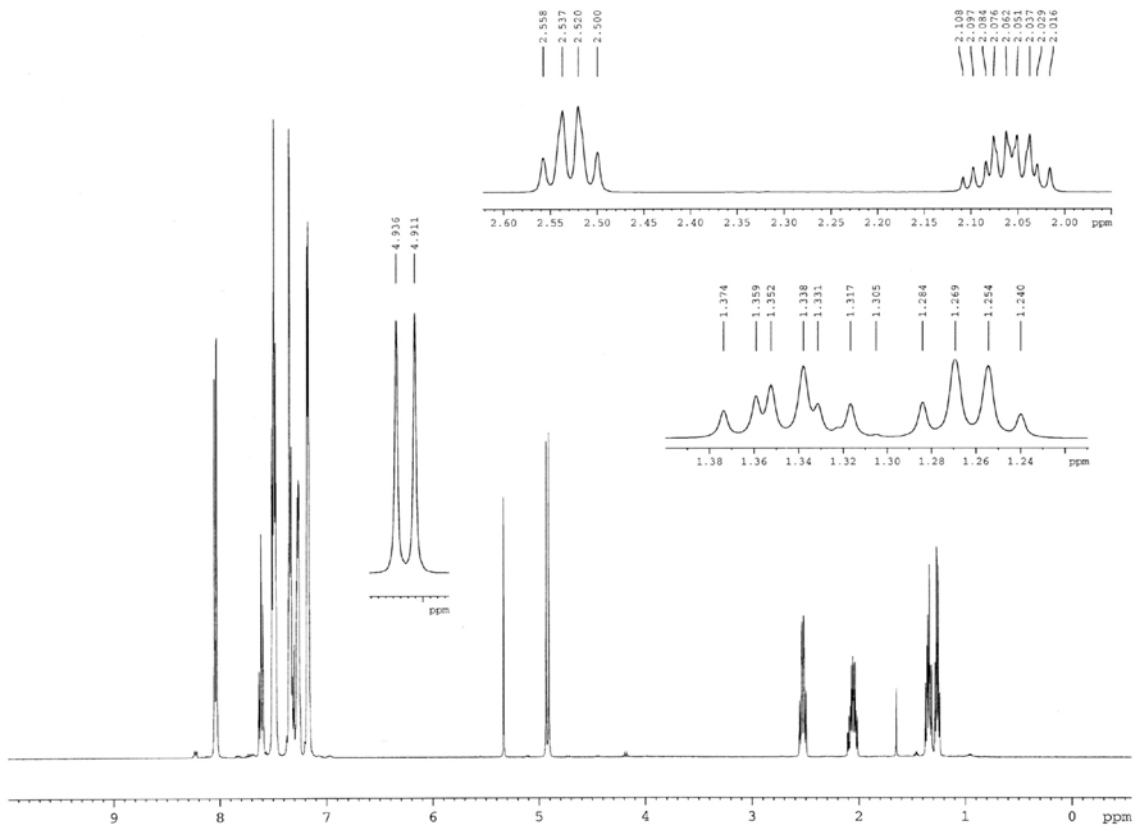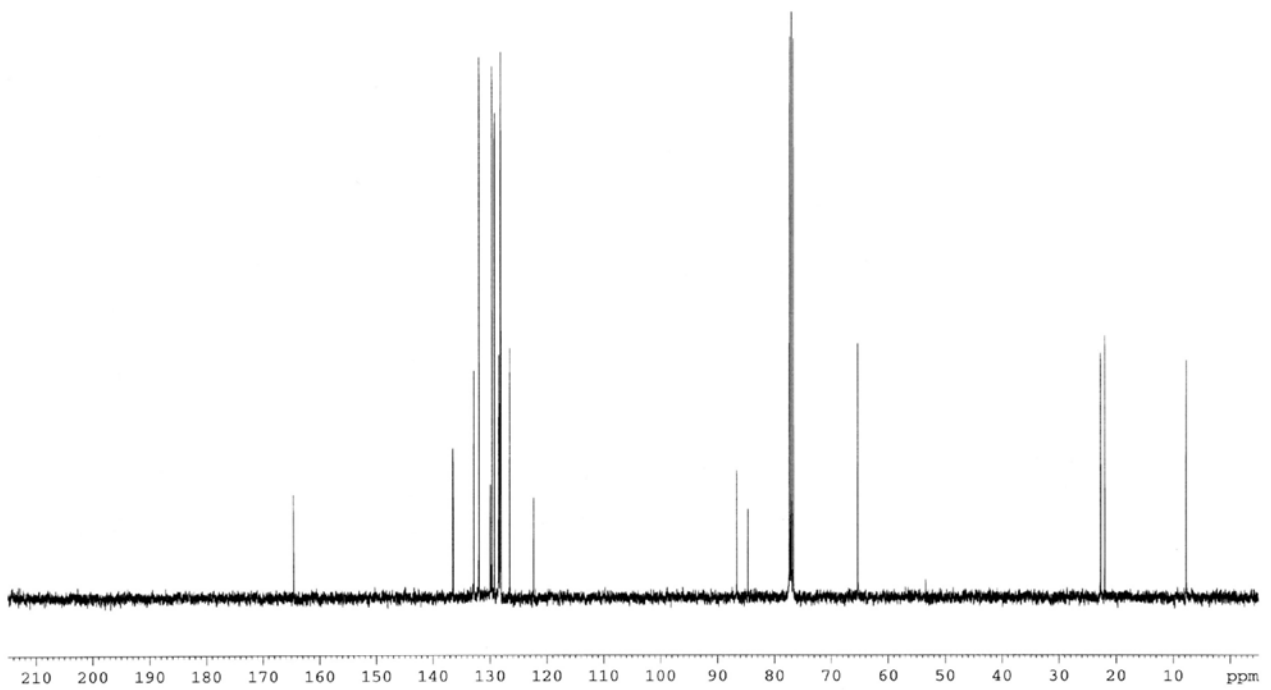

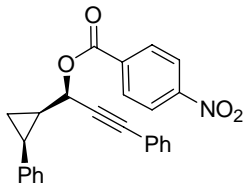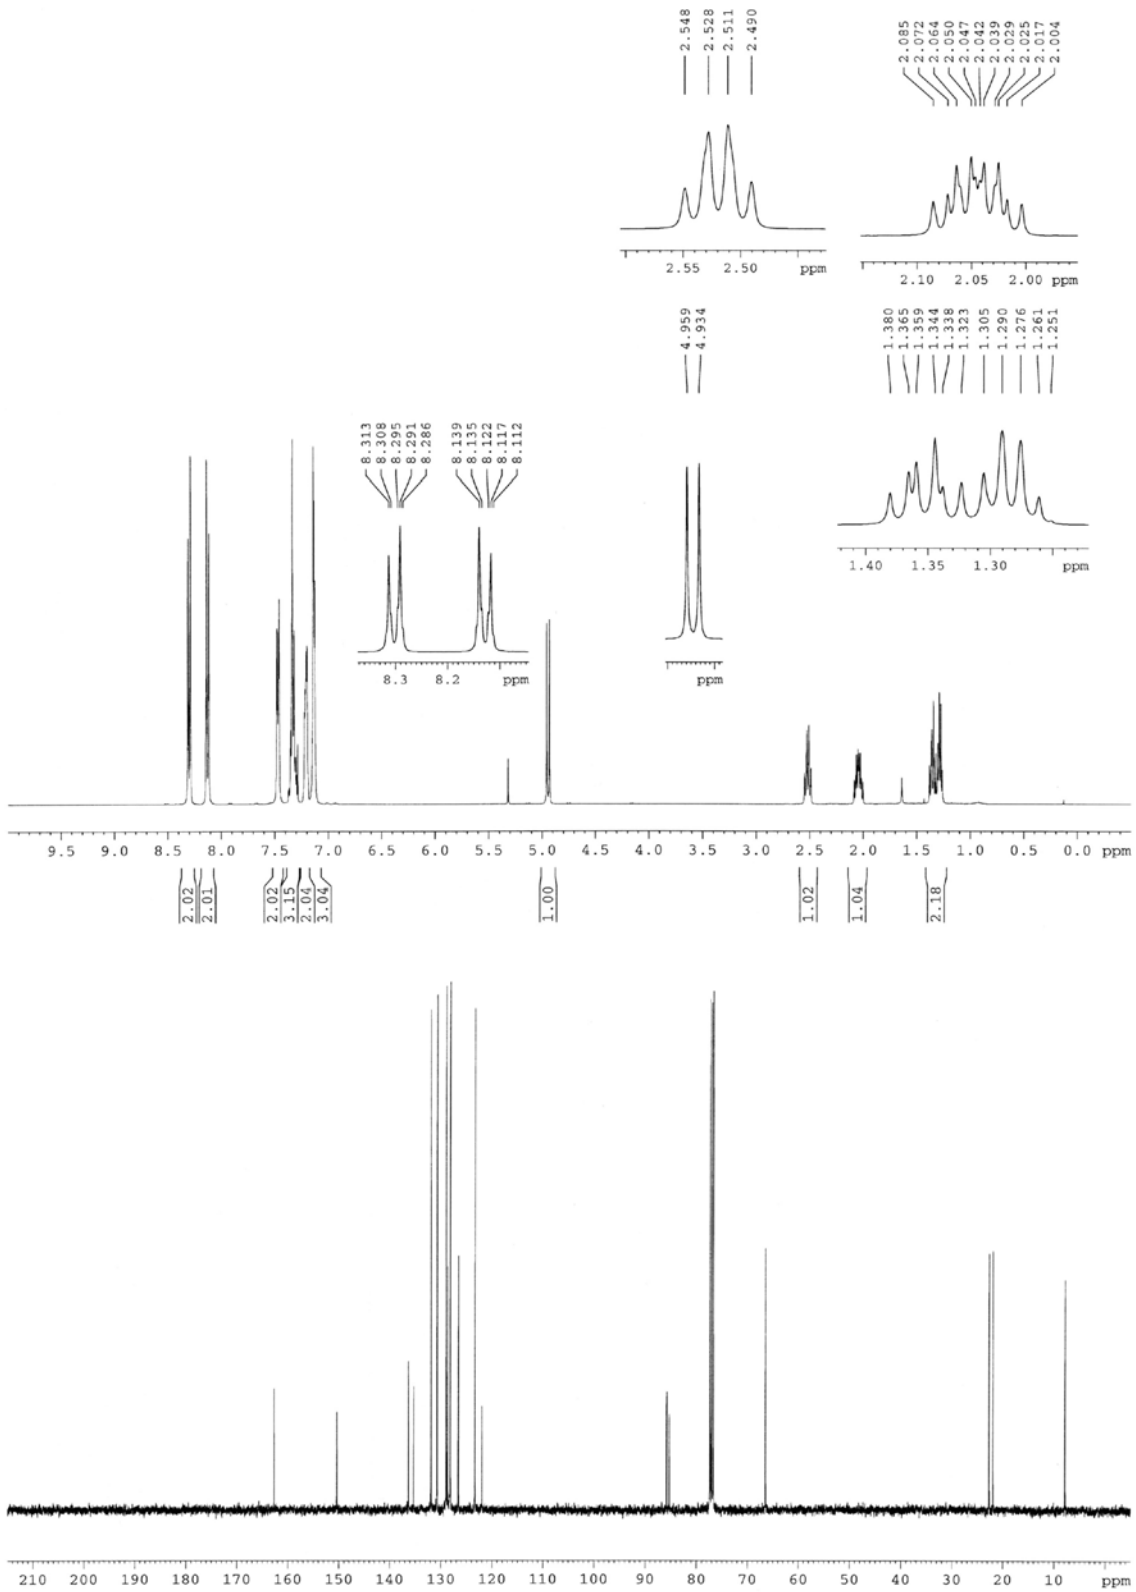

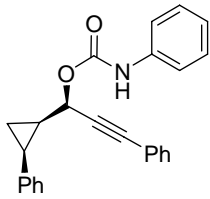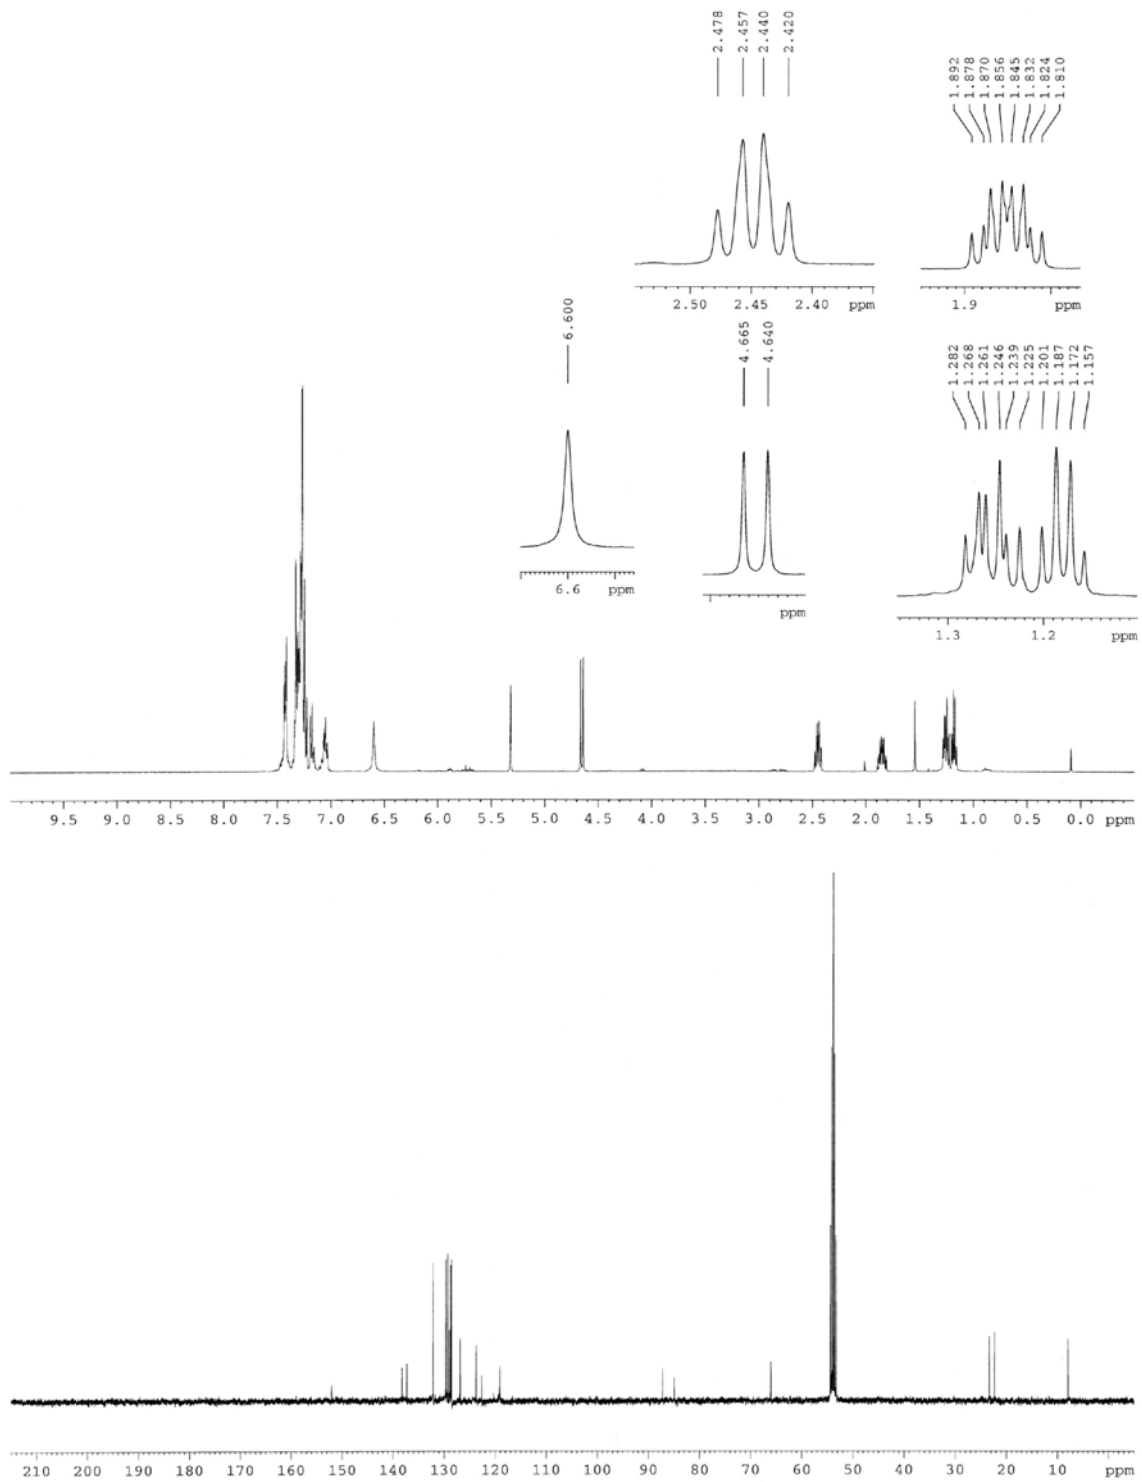

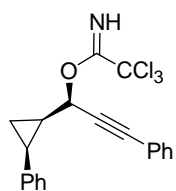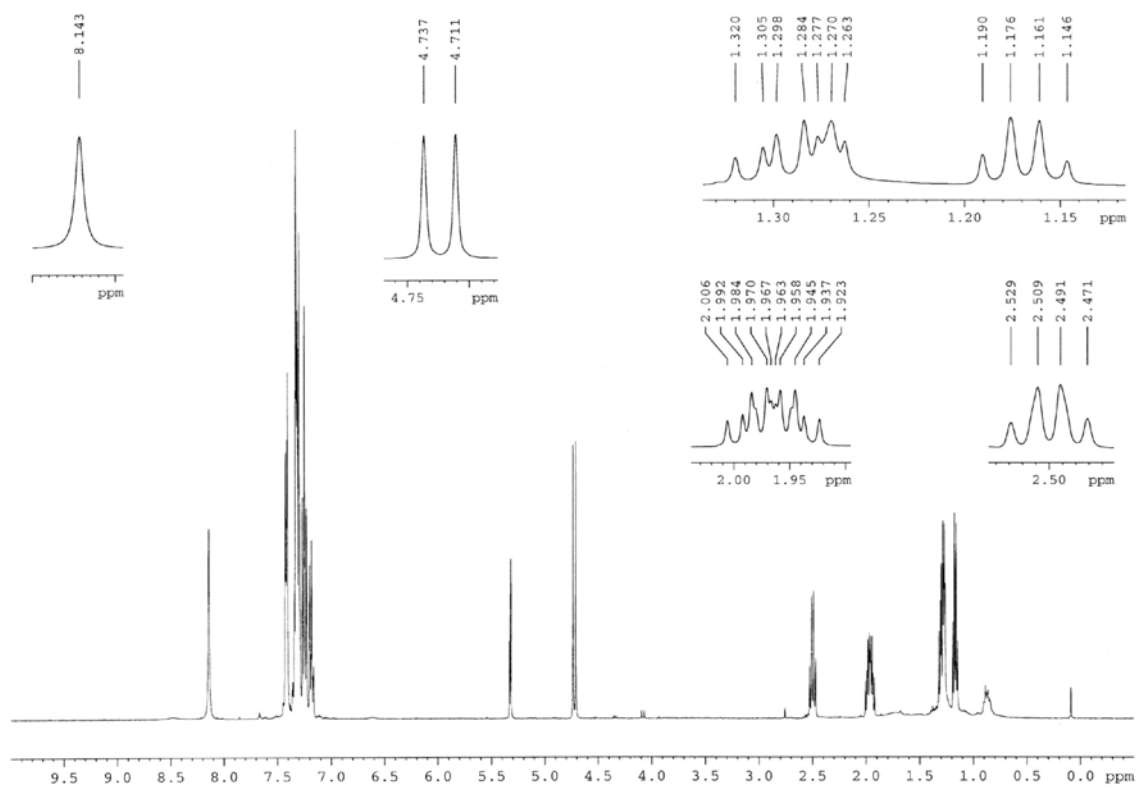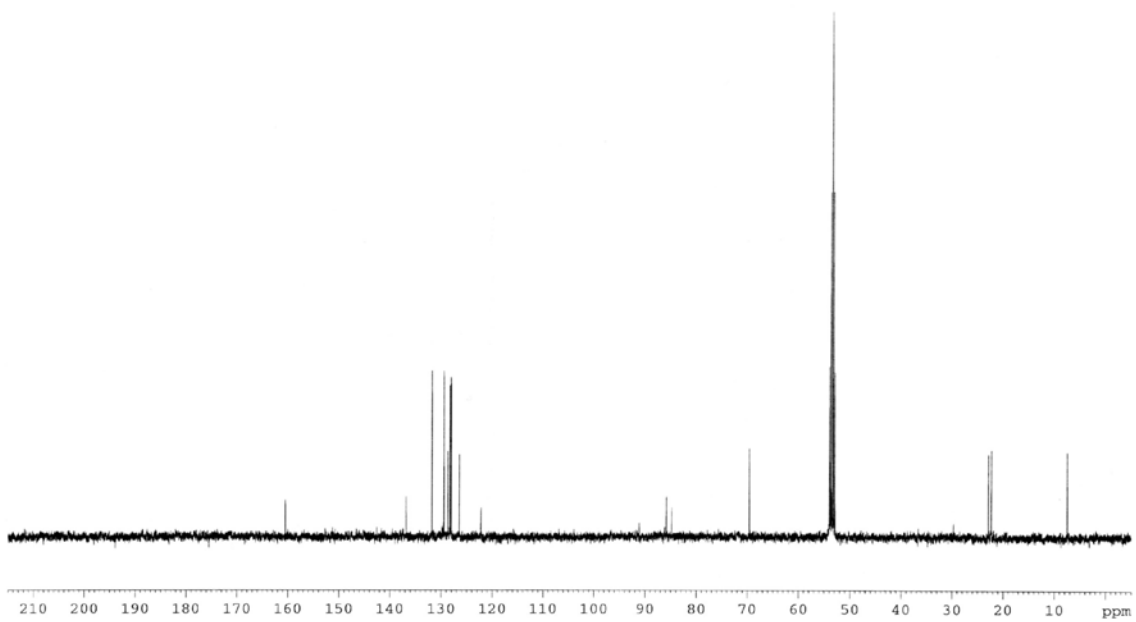



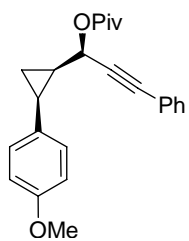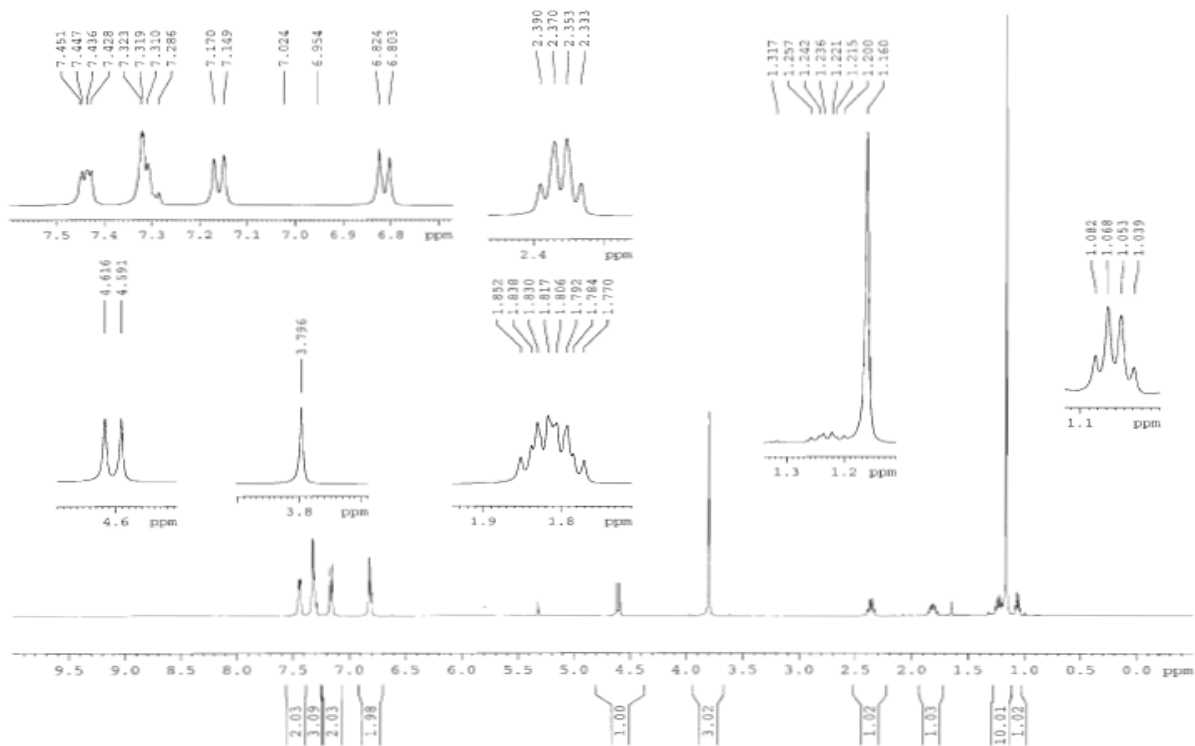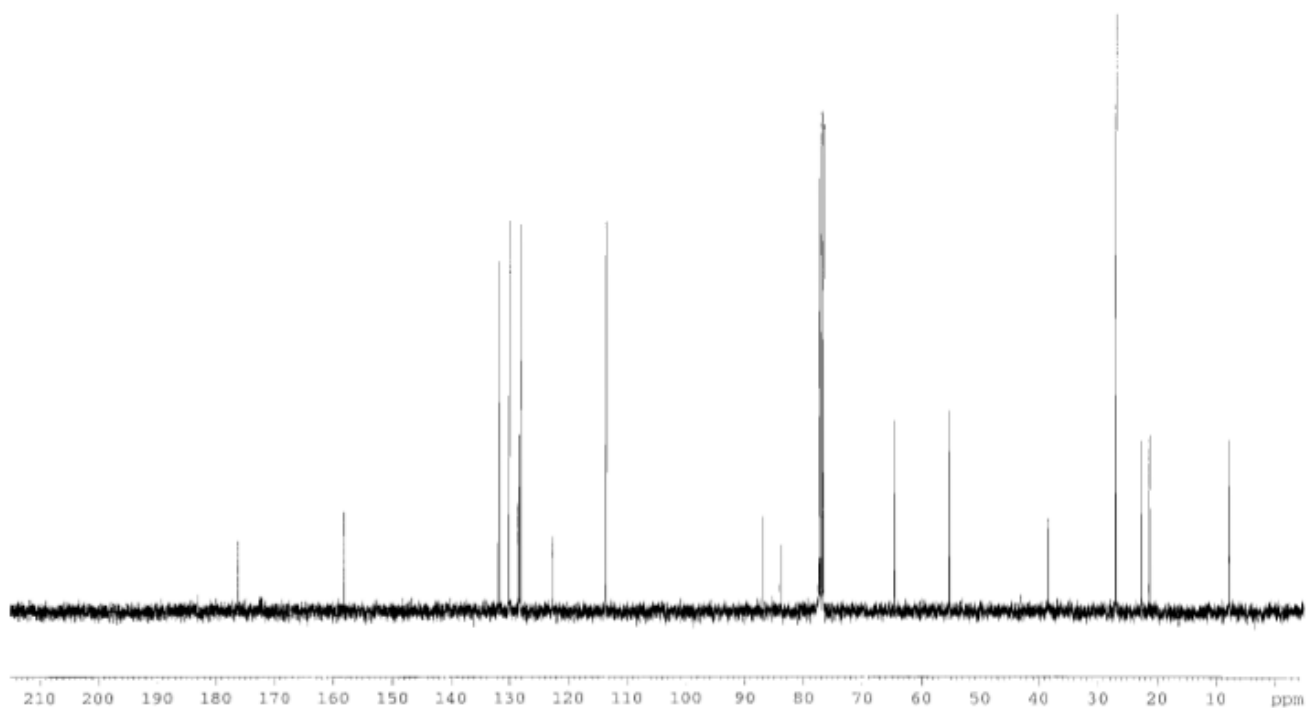

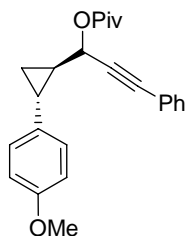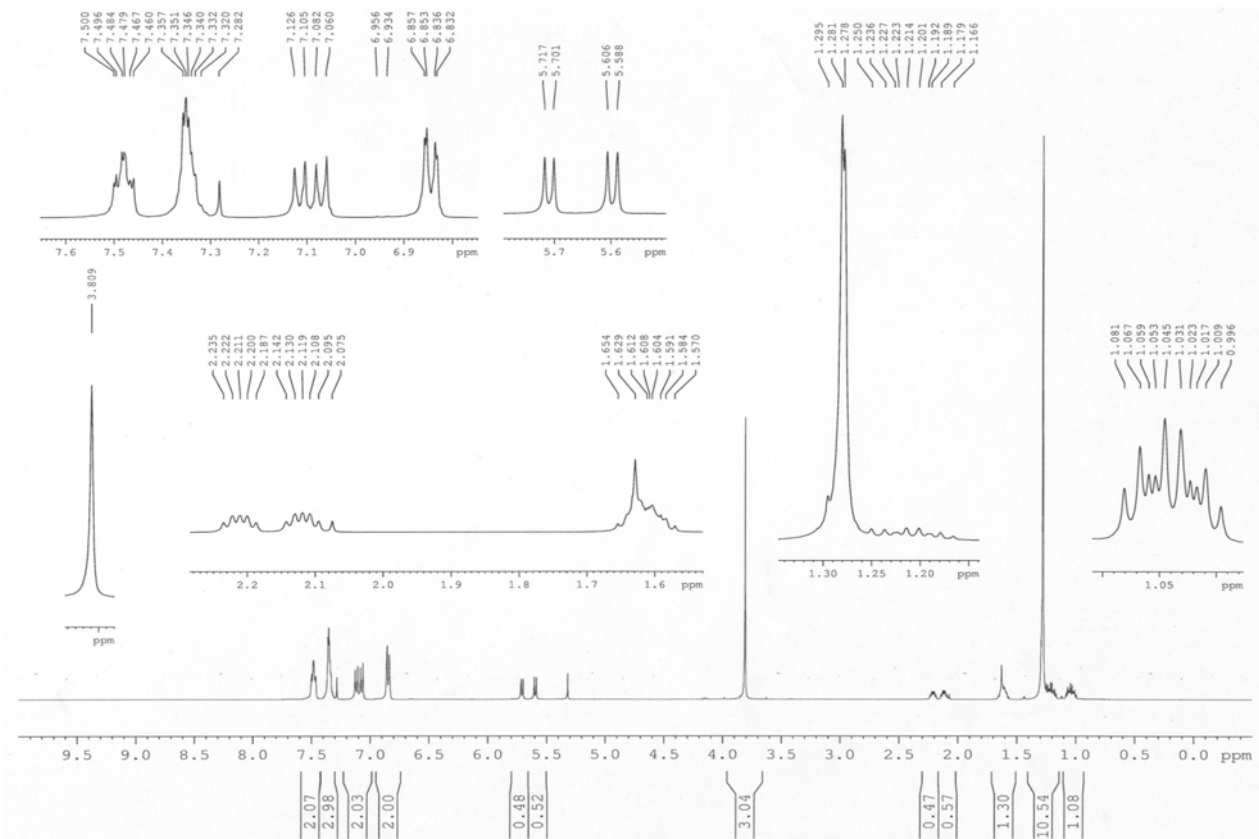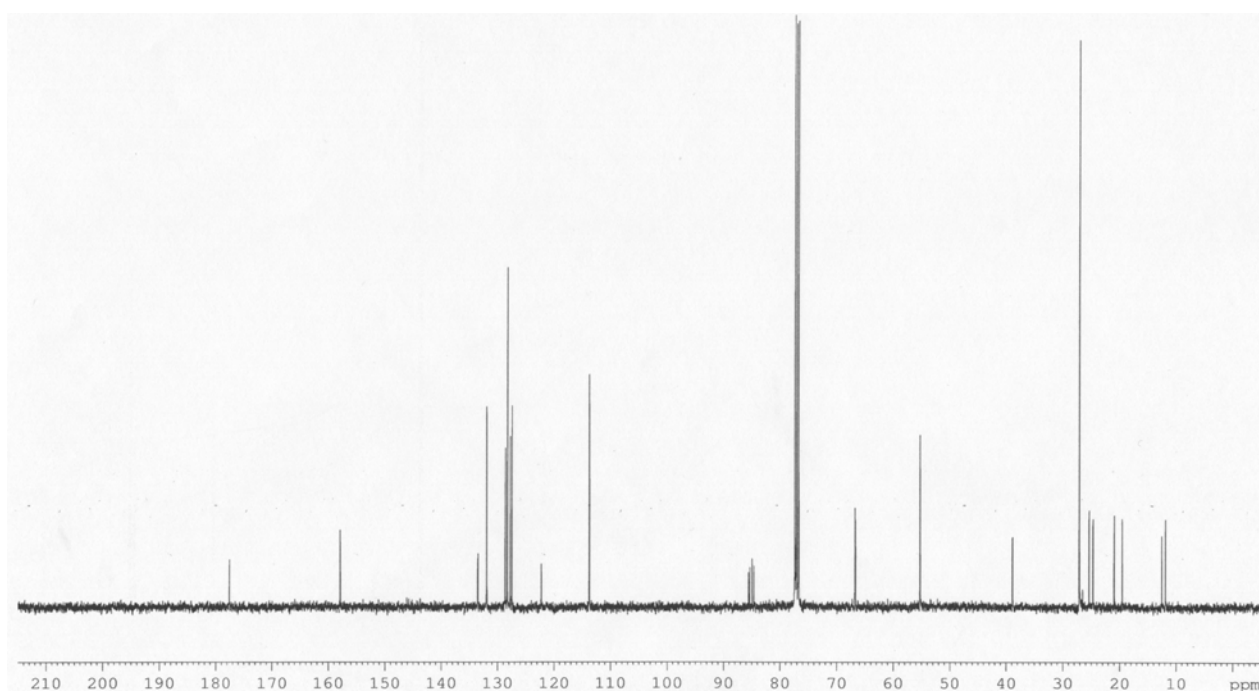

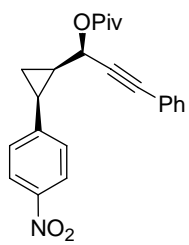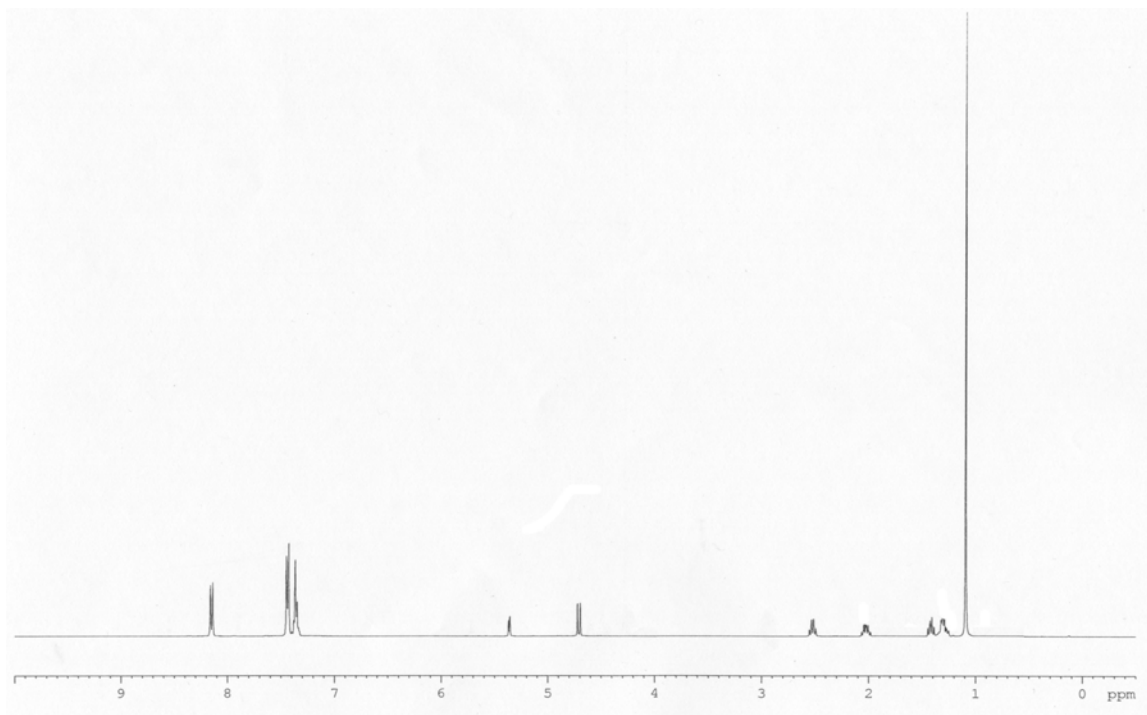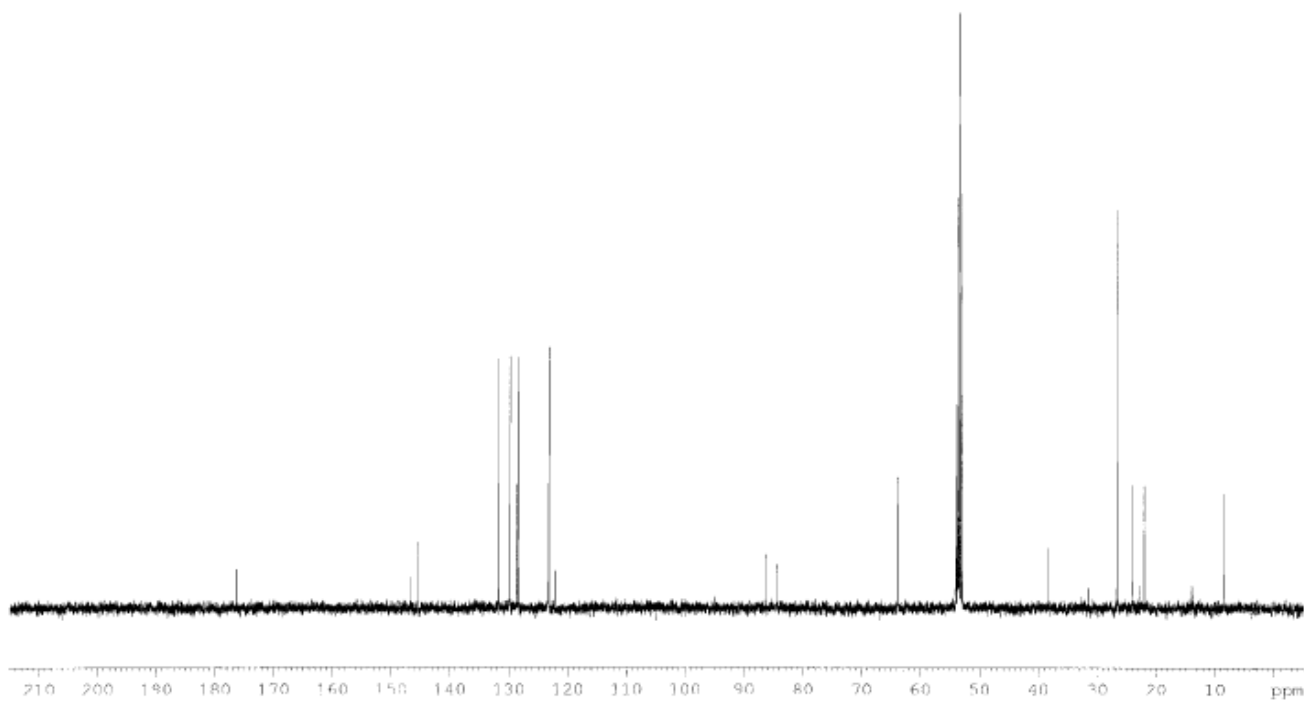

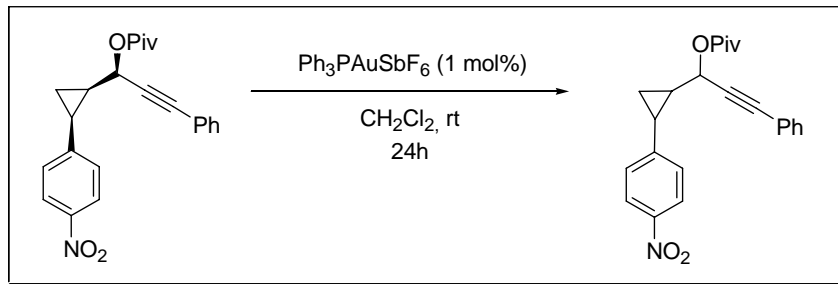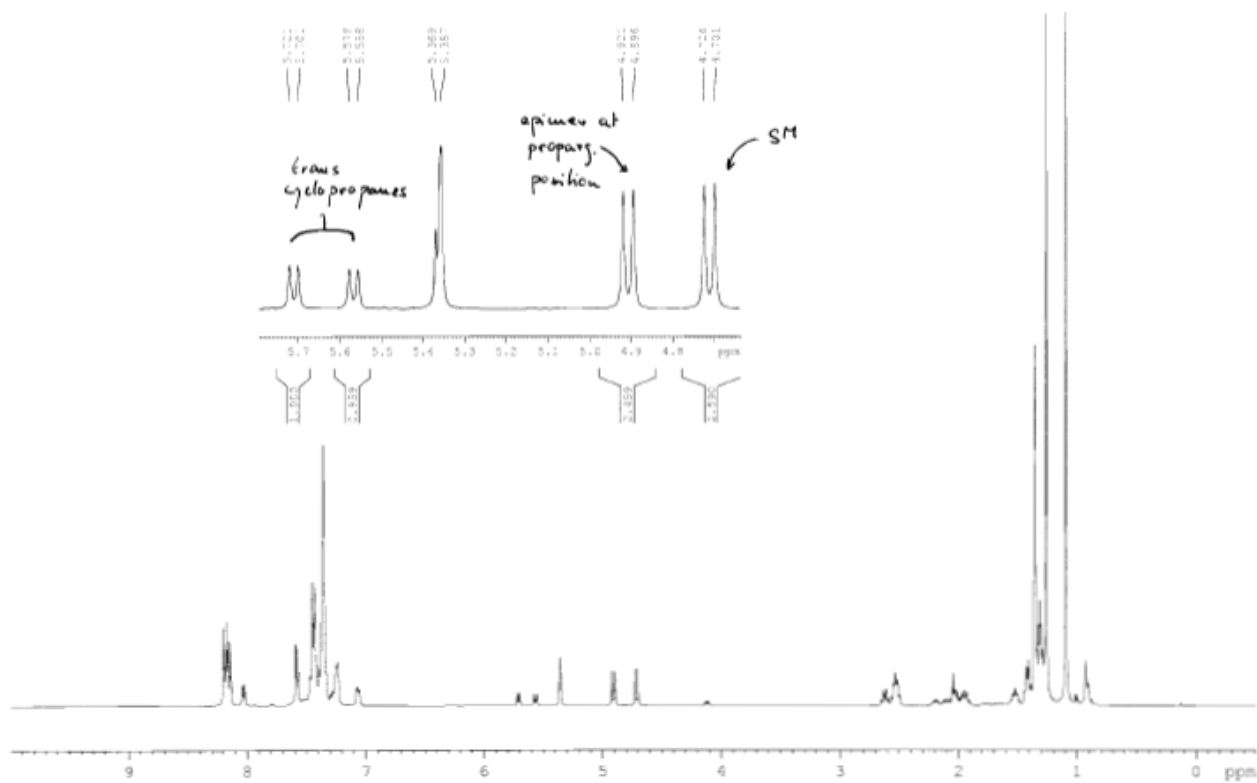

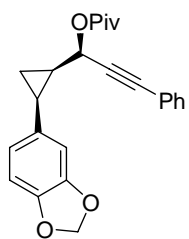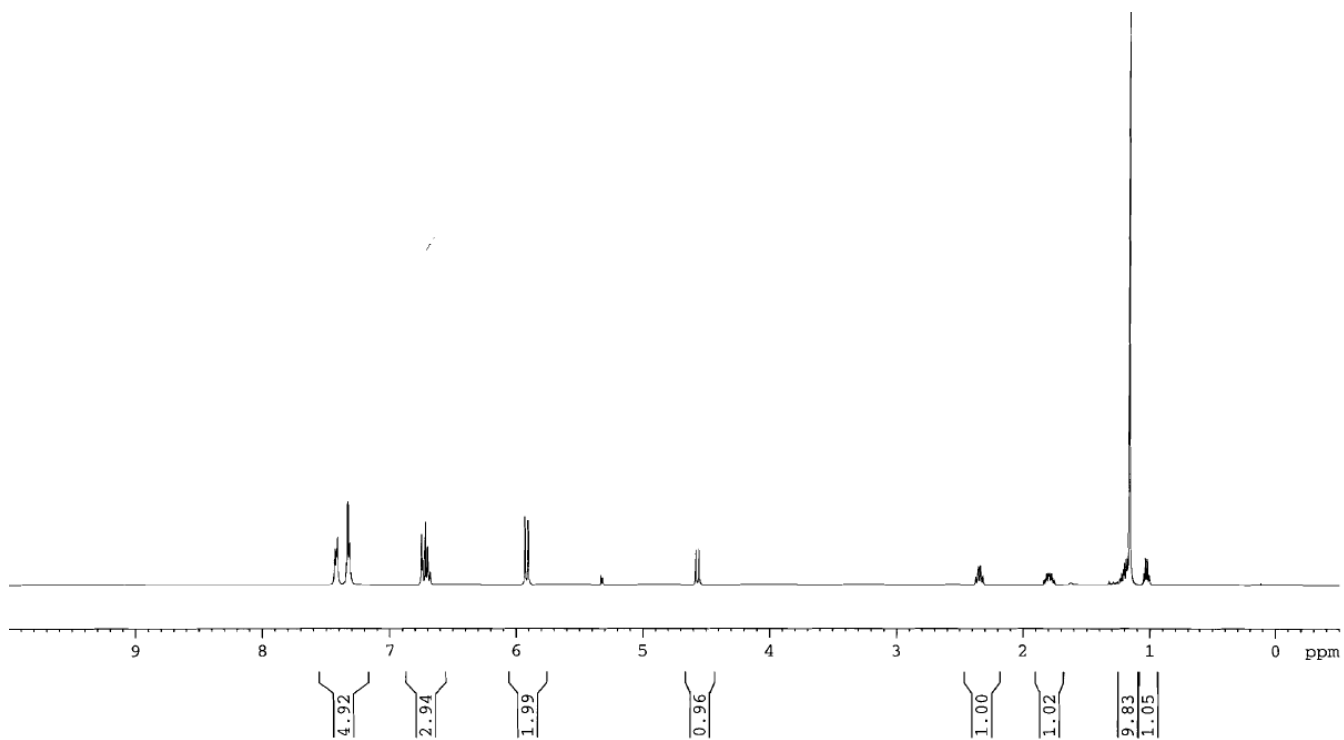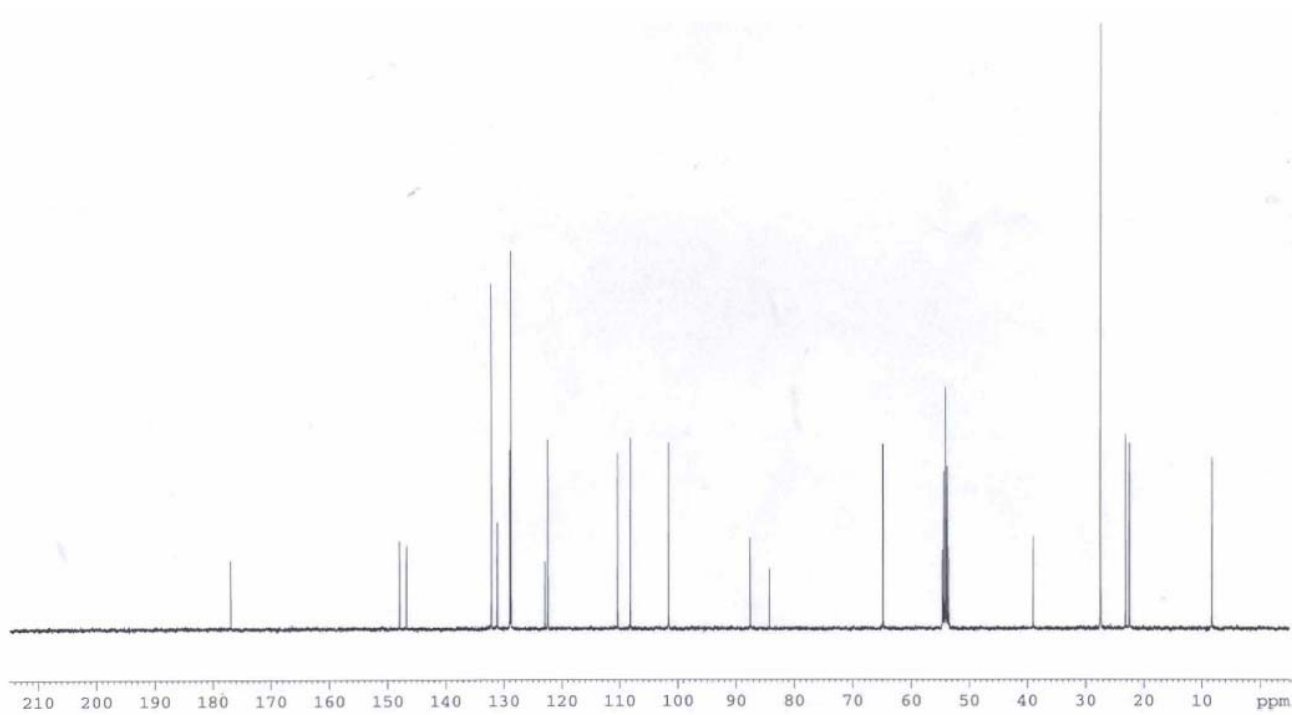

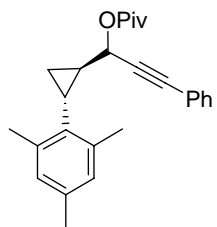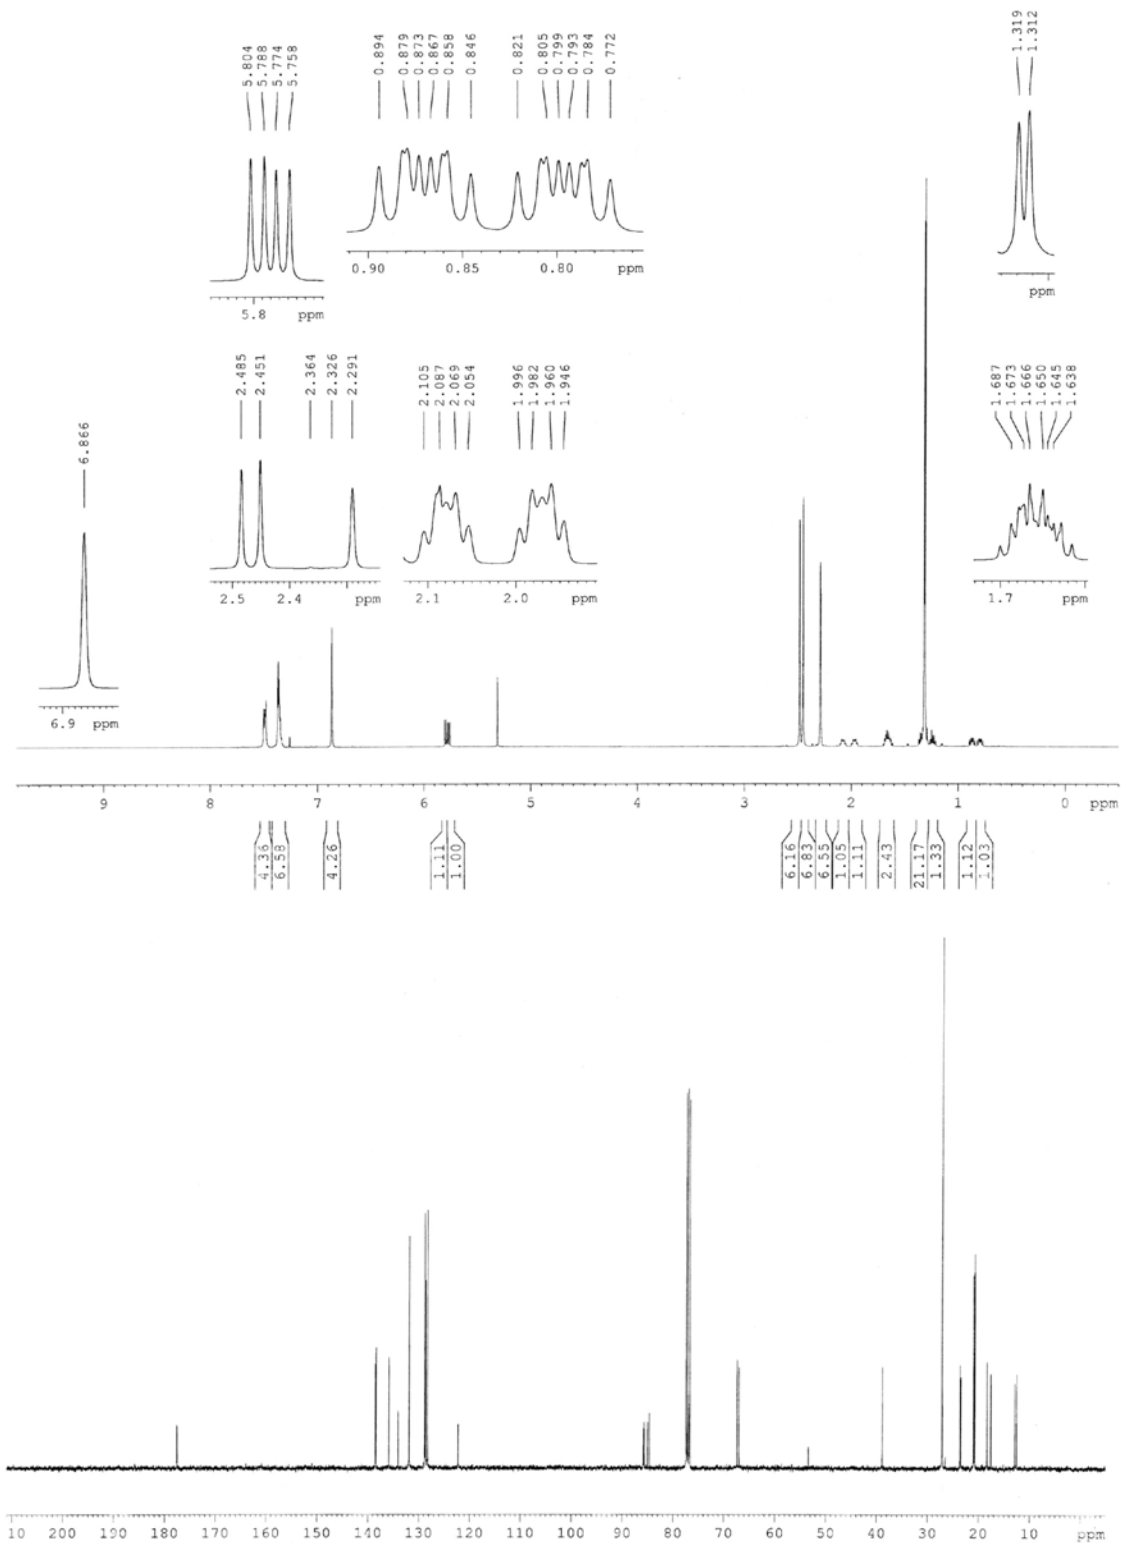

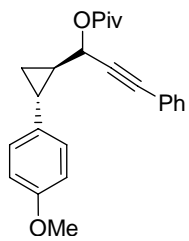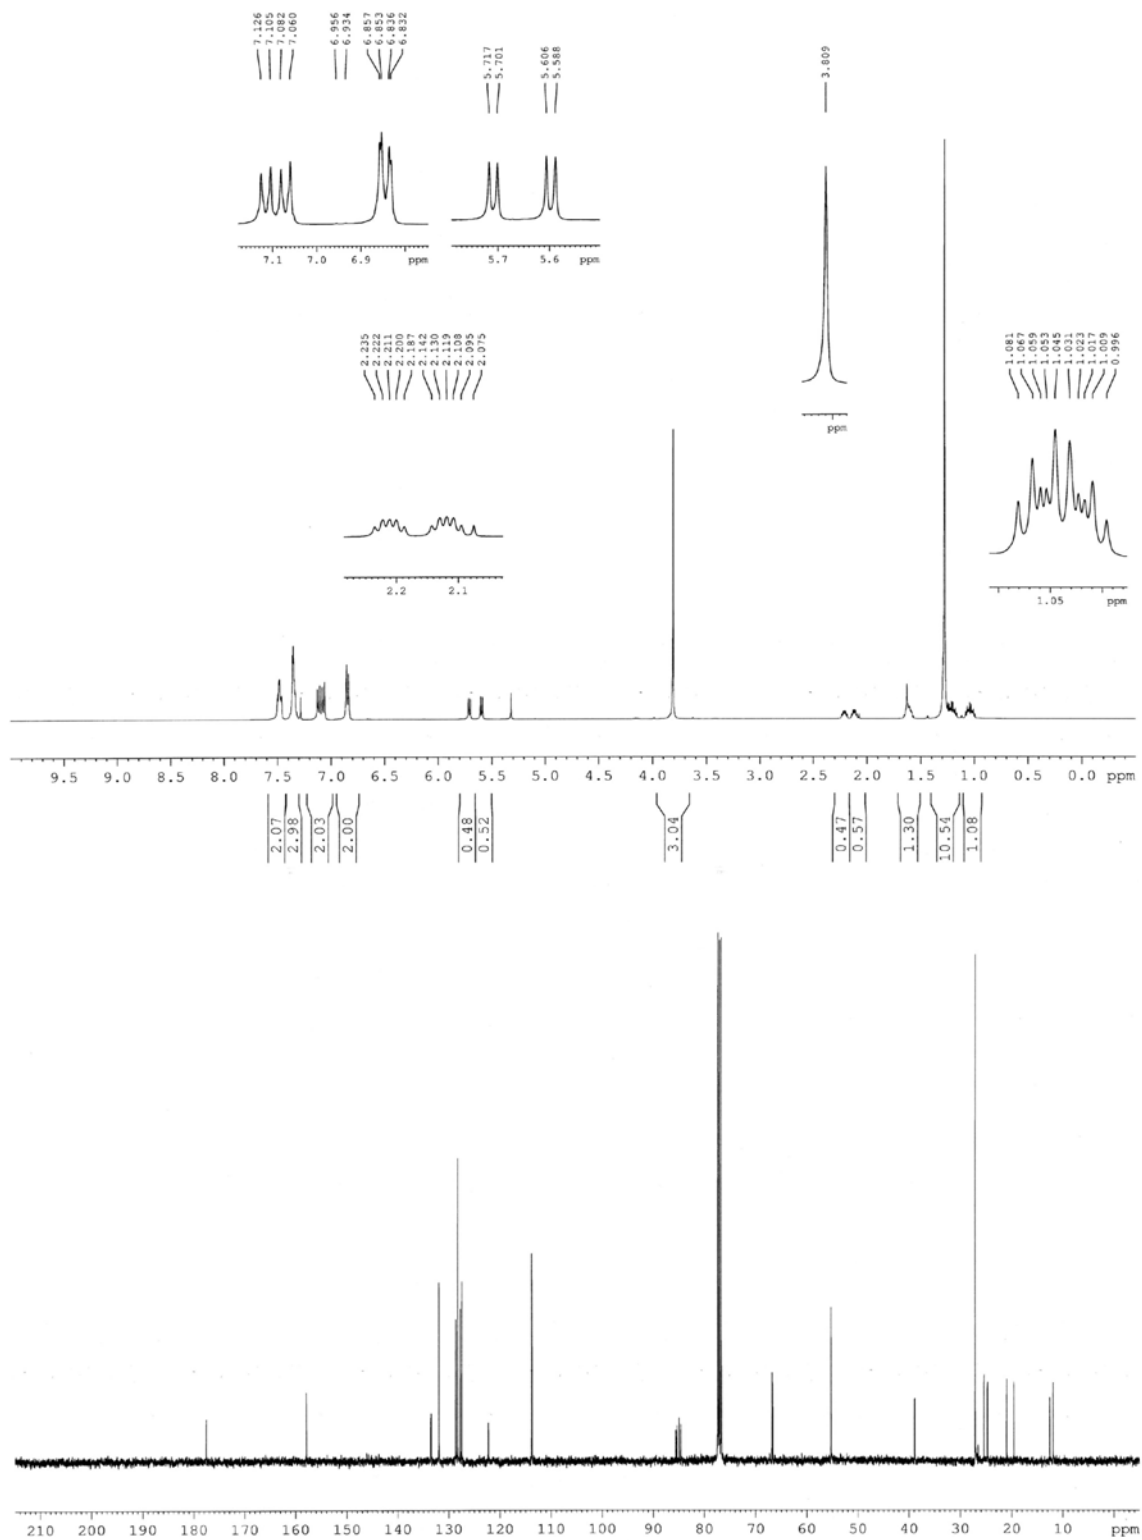

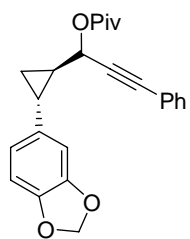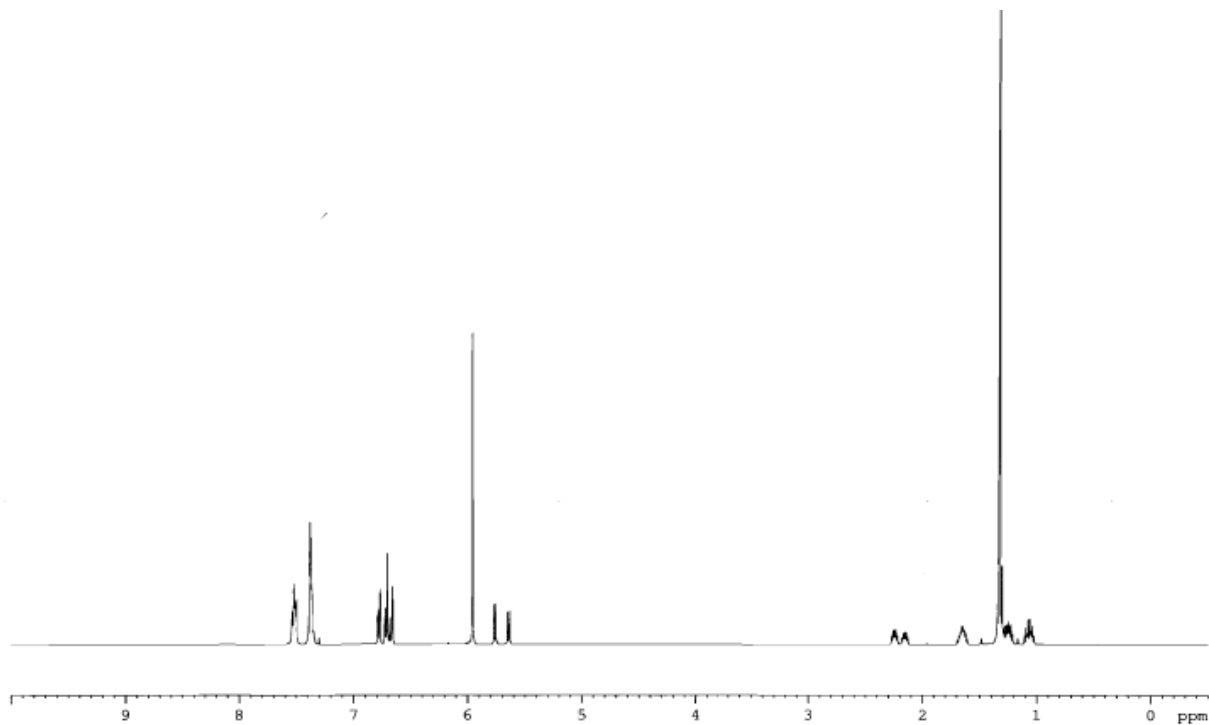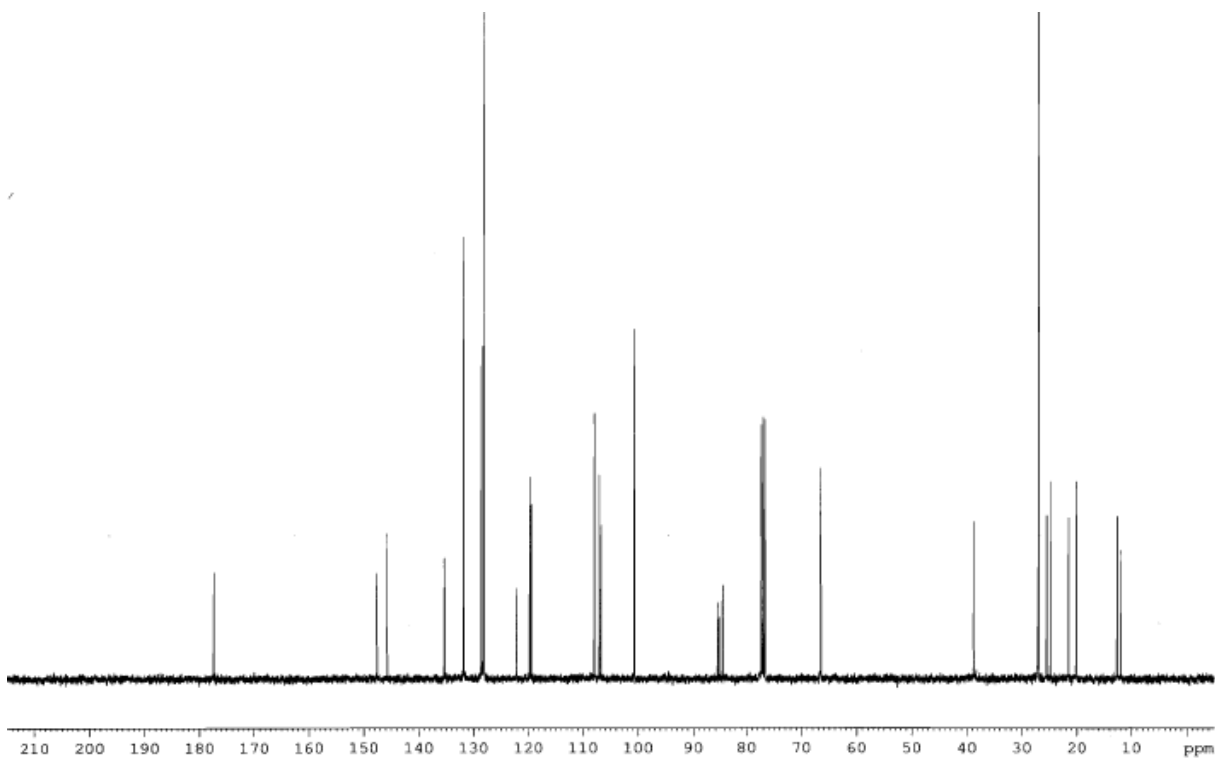



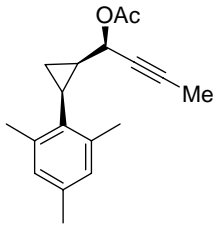

AVB-400 pa0707.252

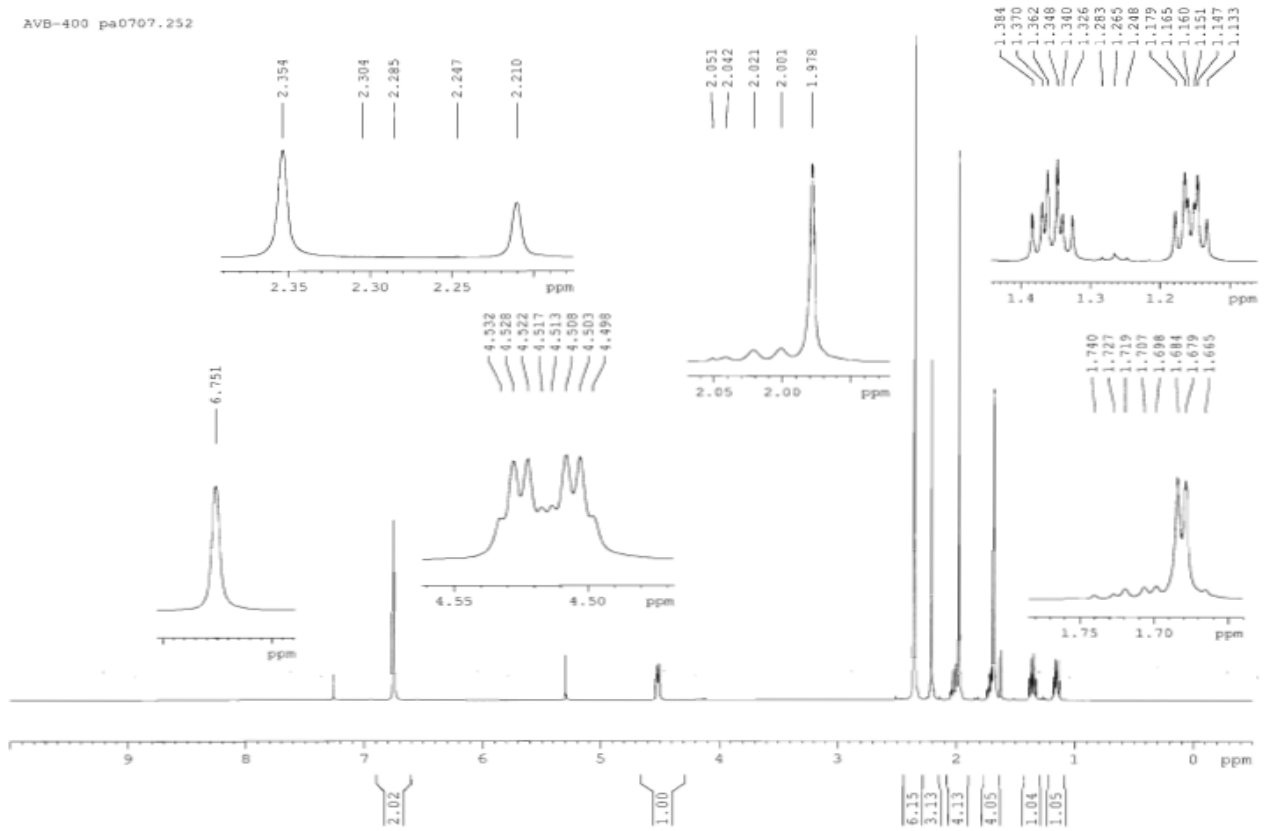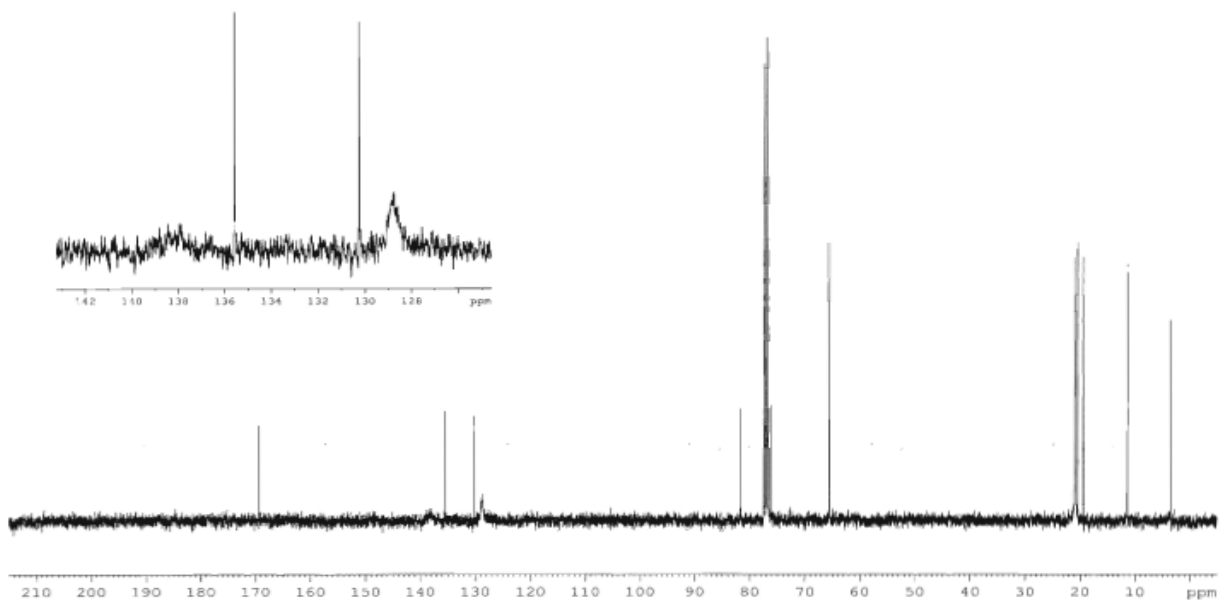

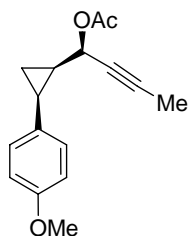

AVB-400 pa0707.251

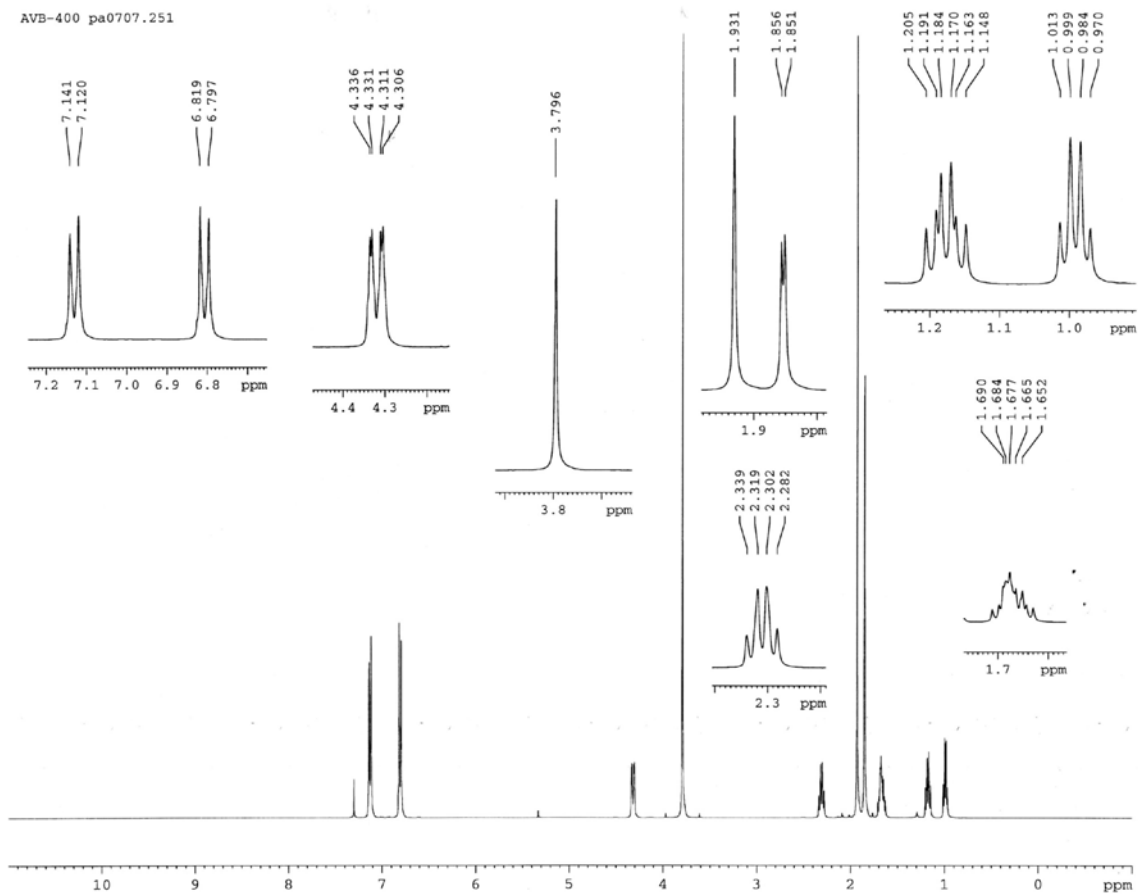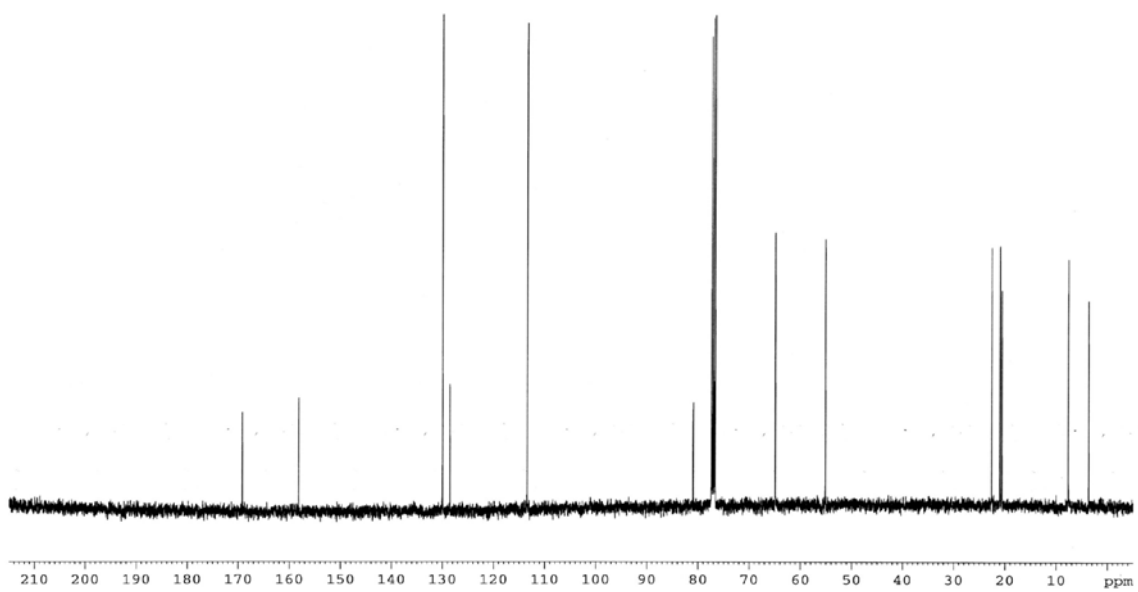

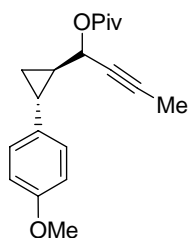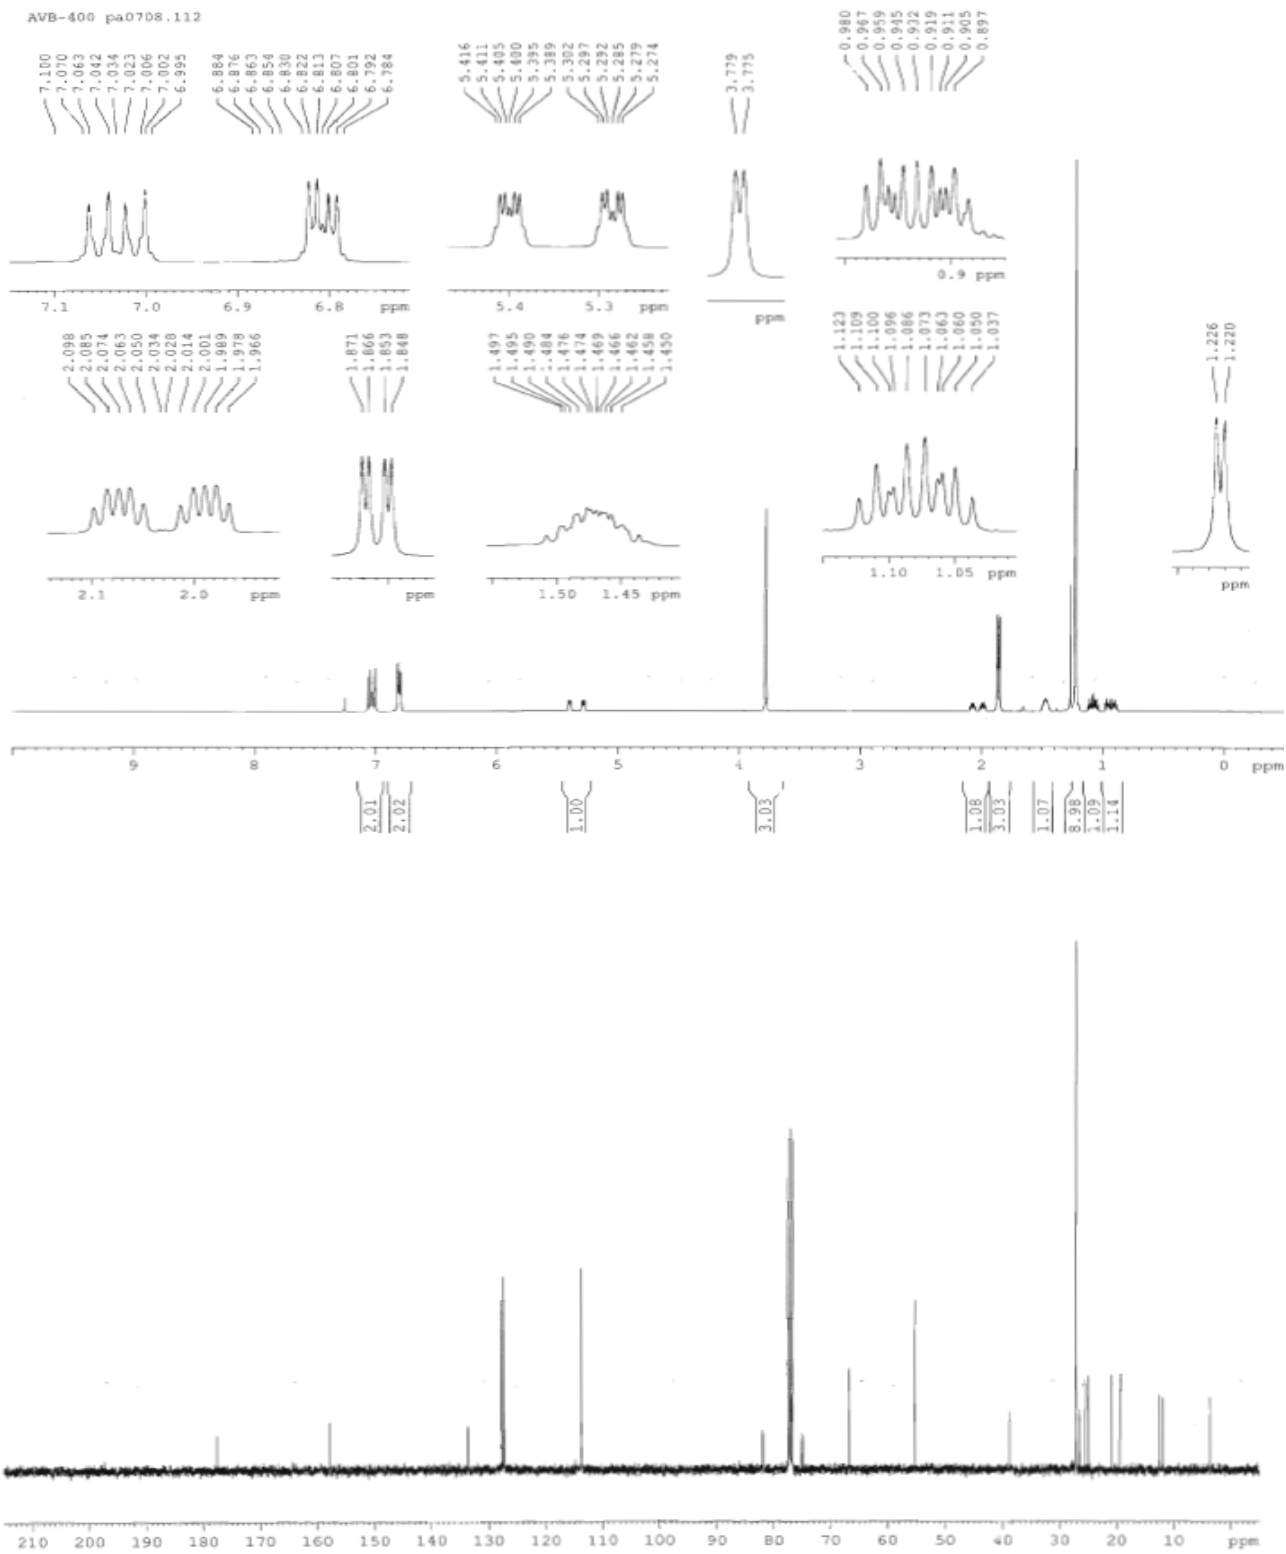

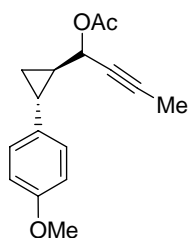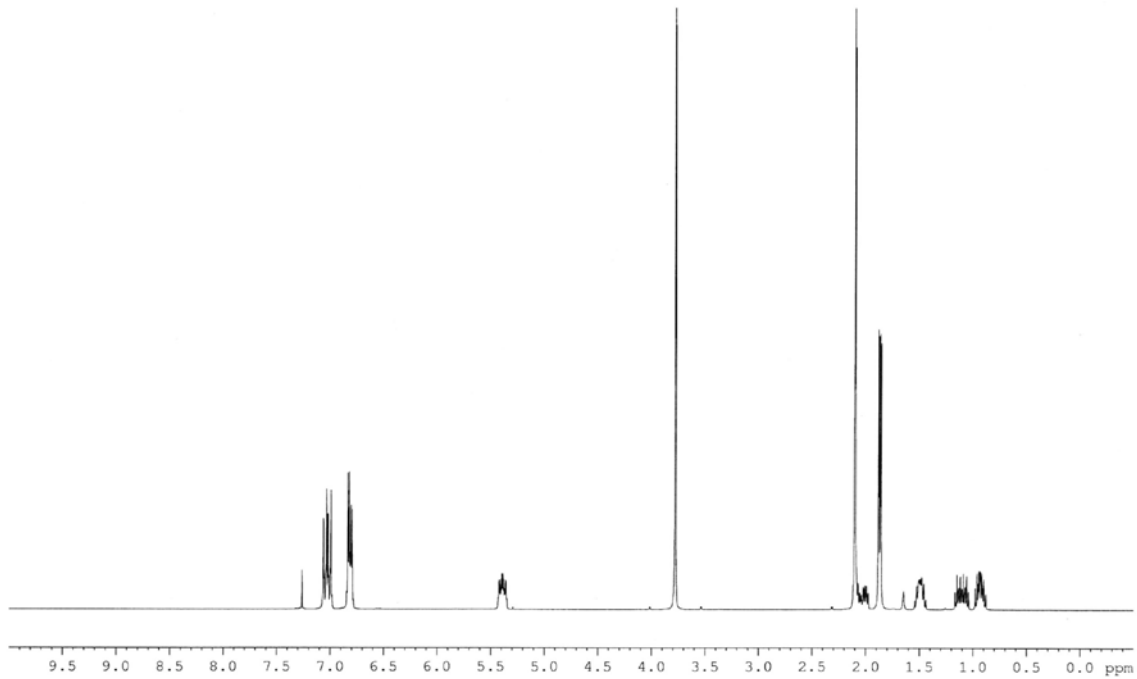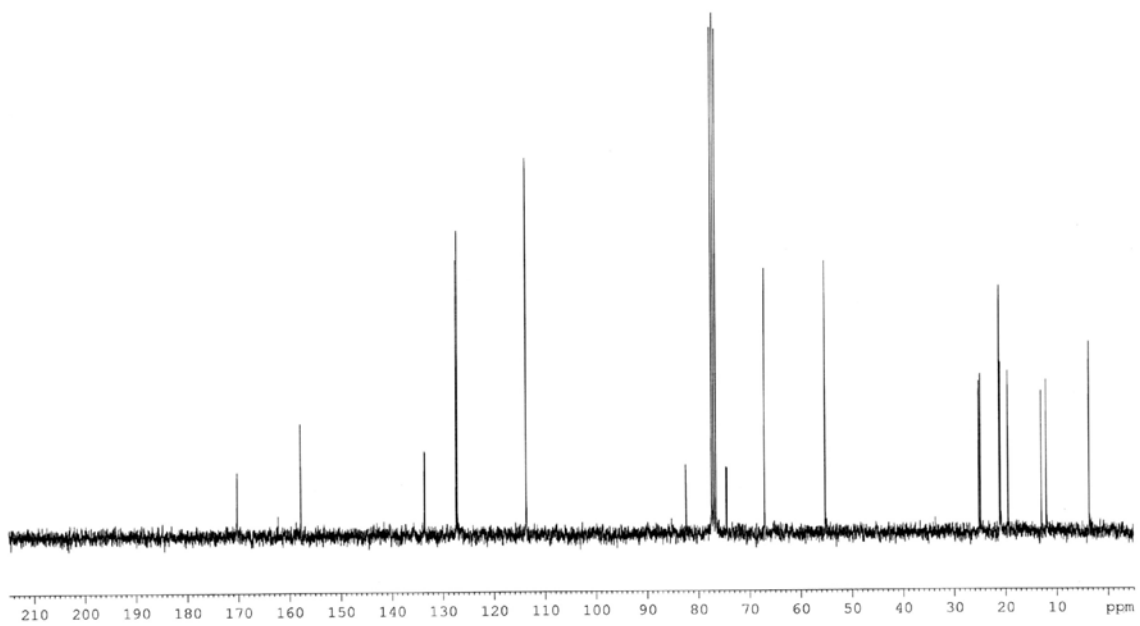

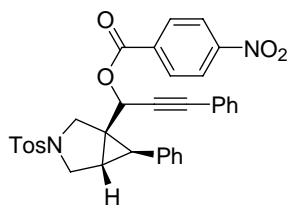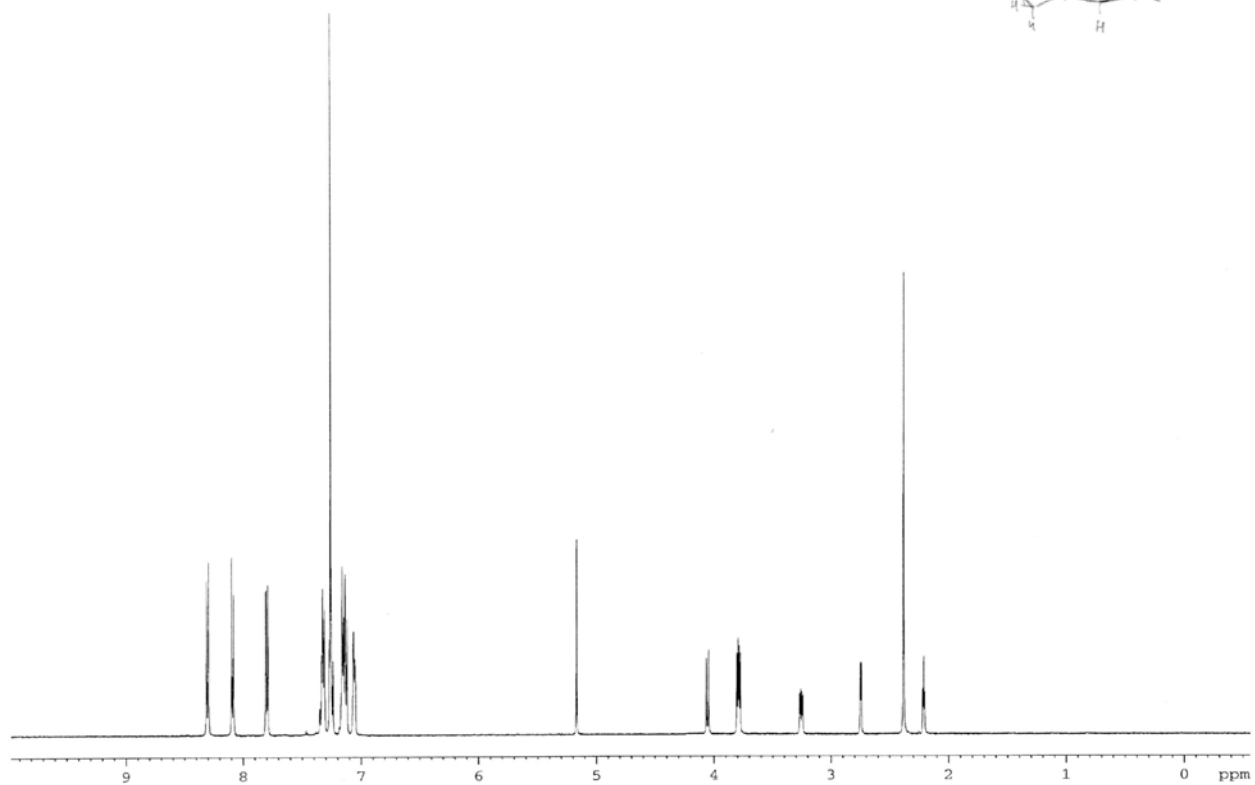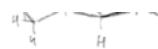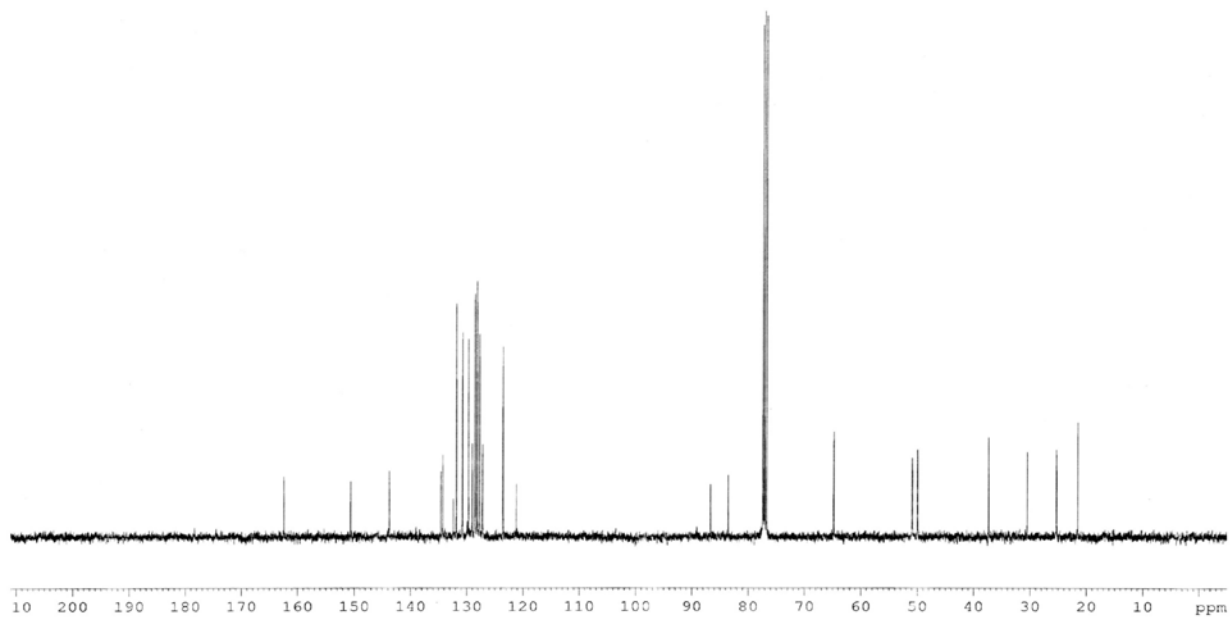

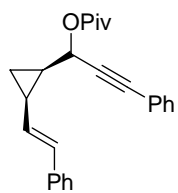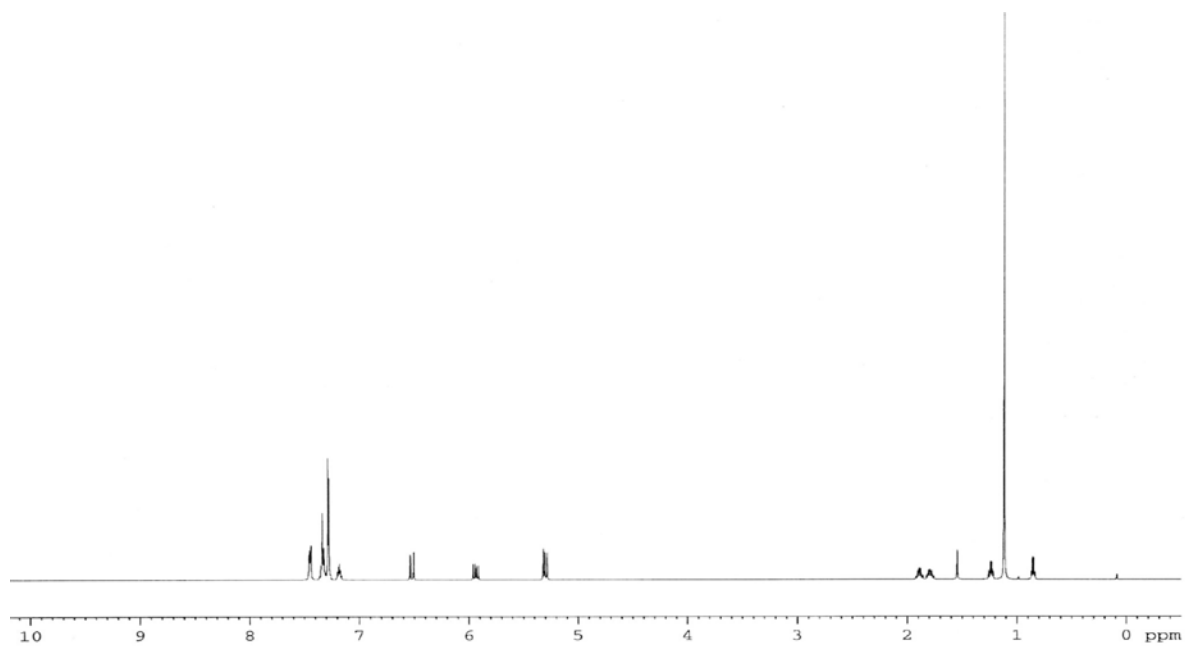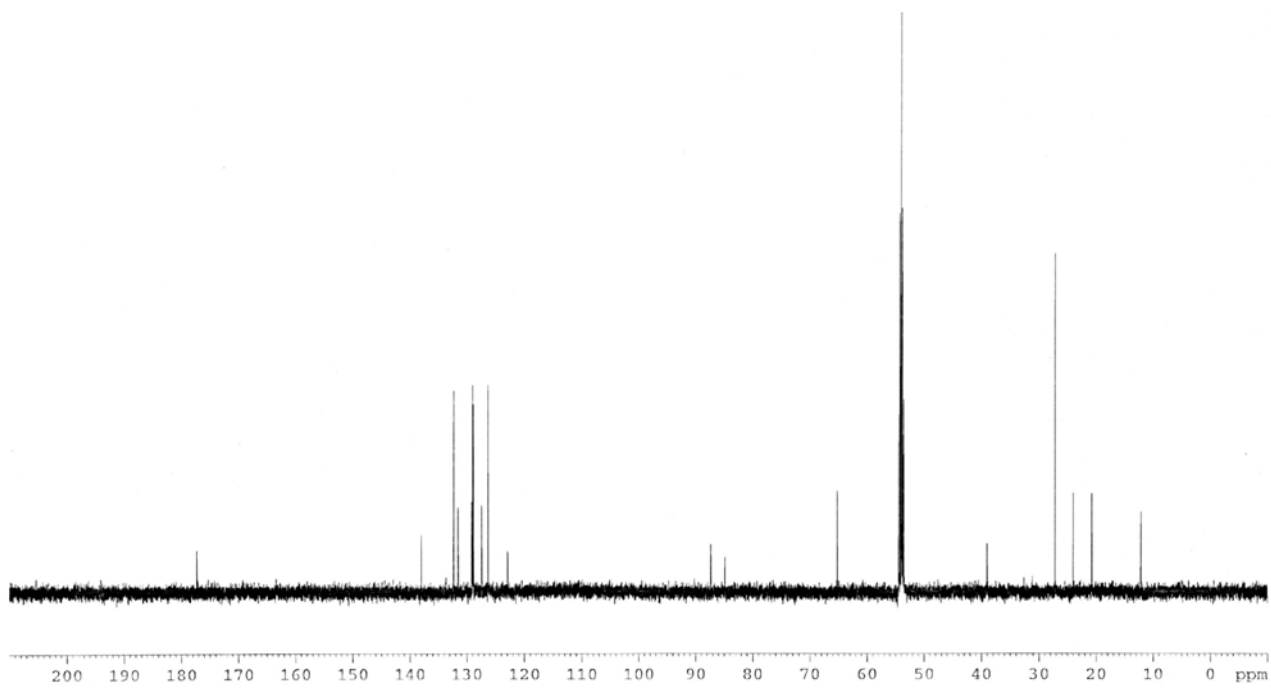

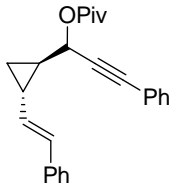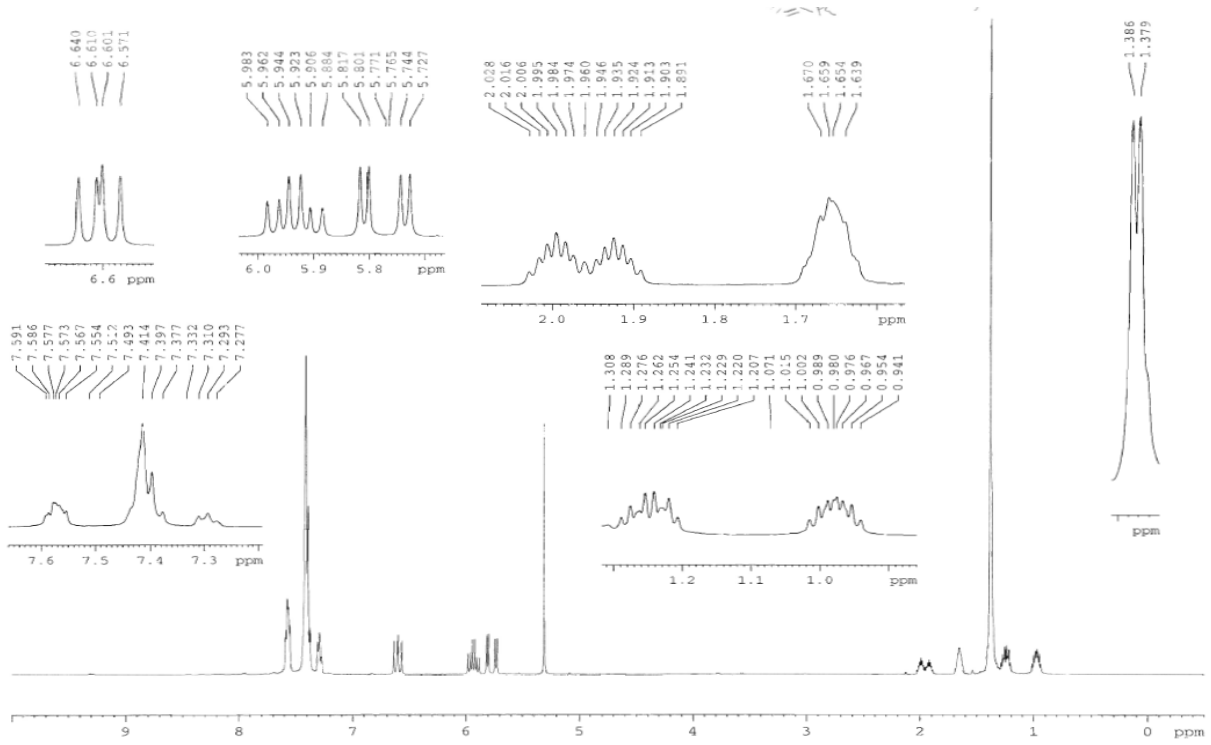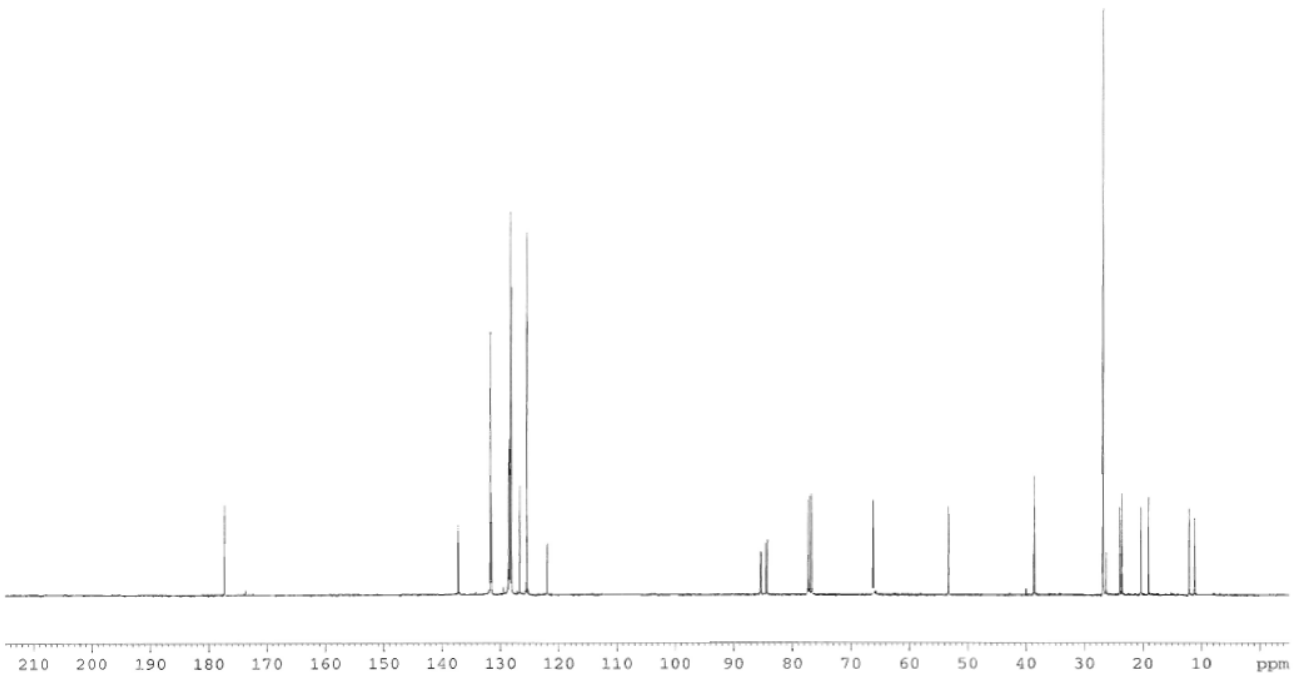

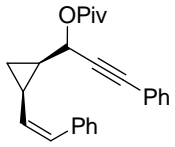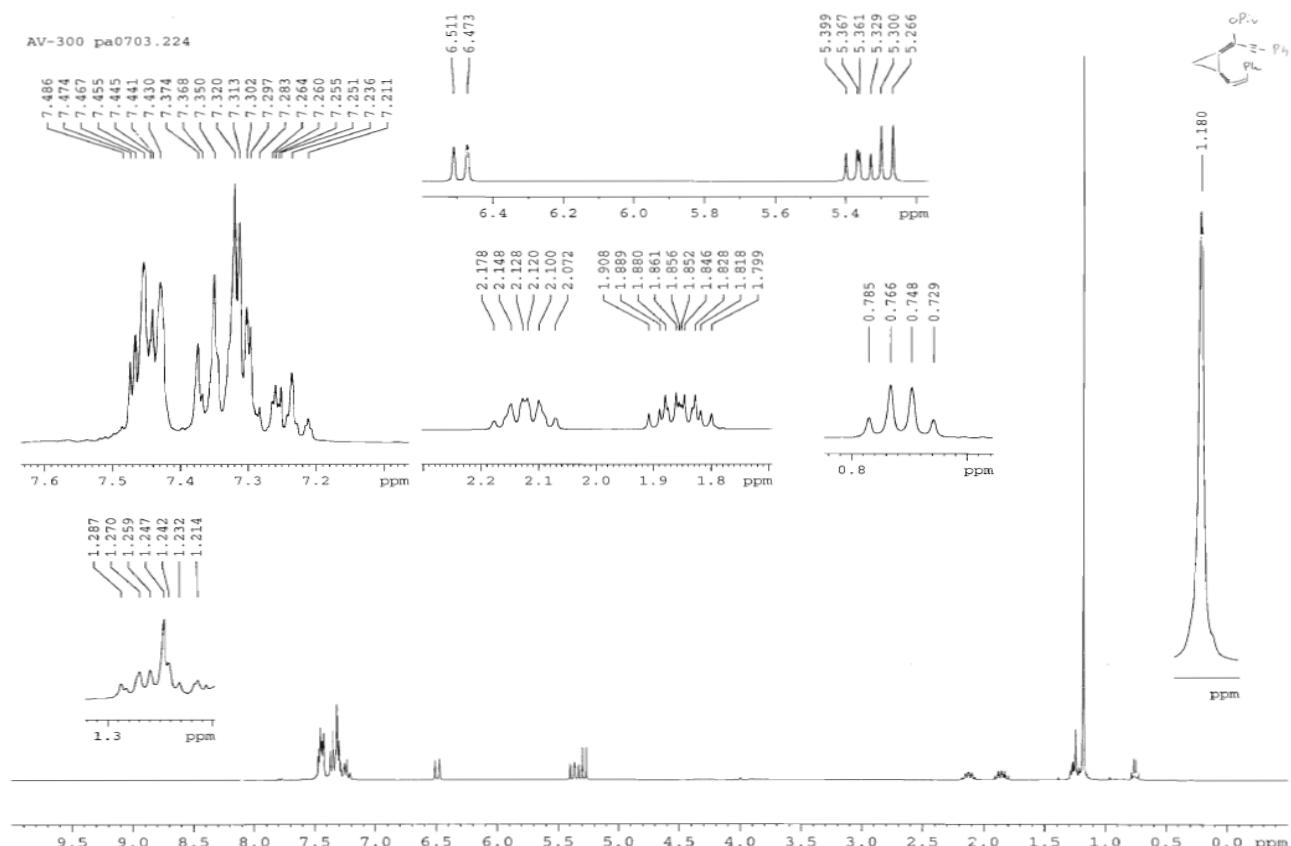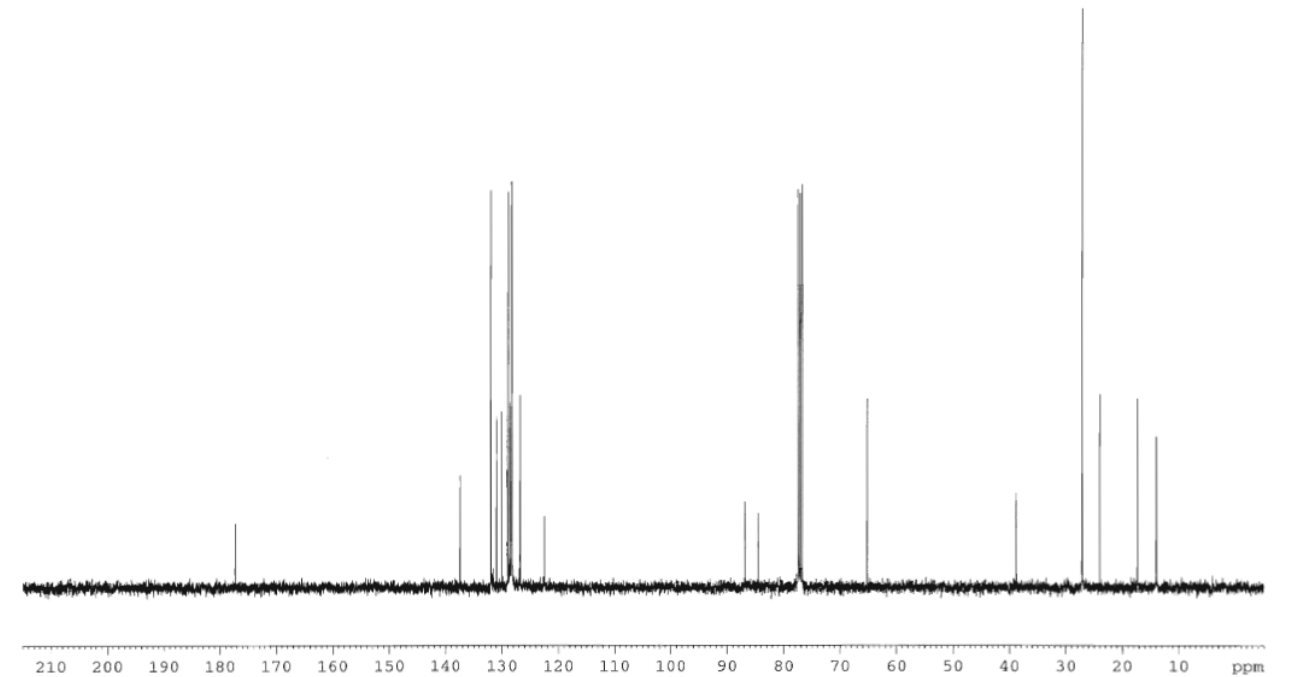



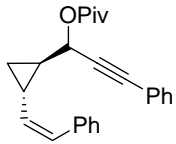

AVB-400 ps0703.223

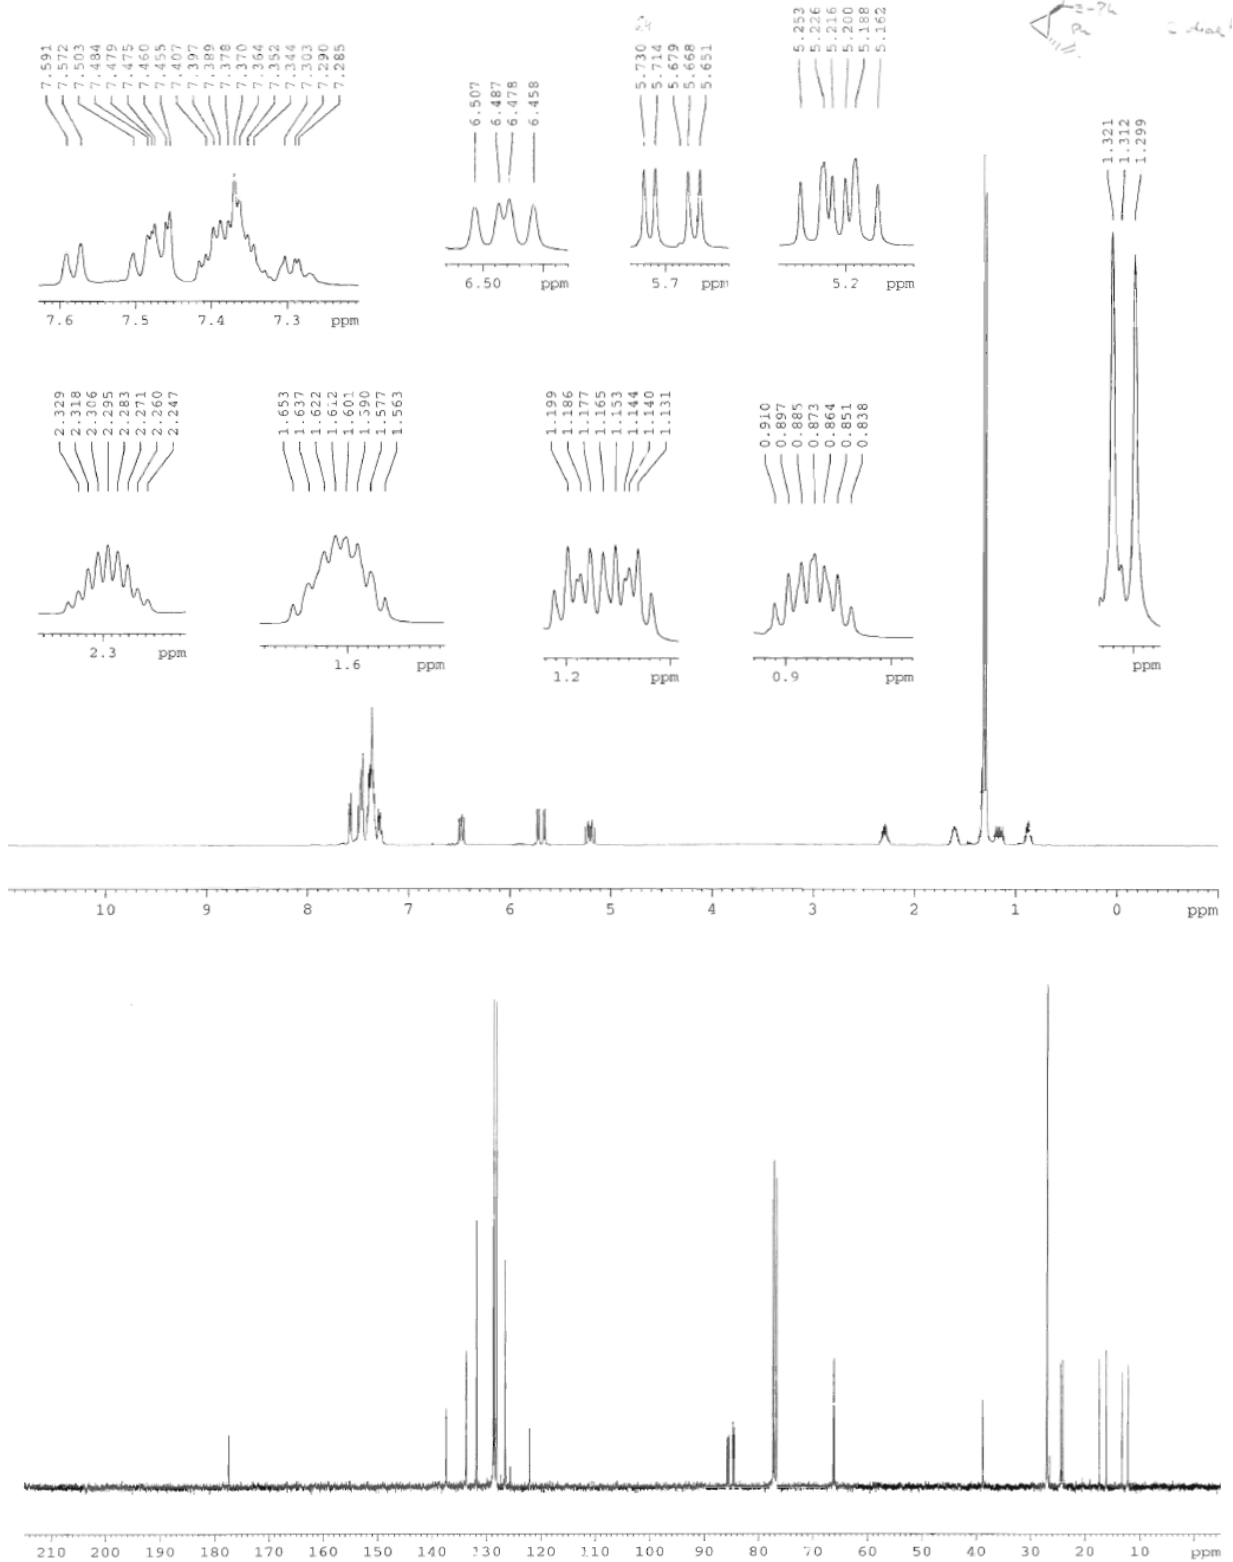

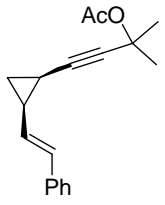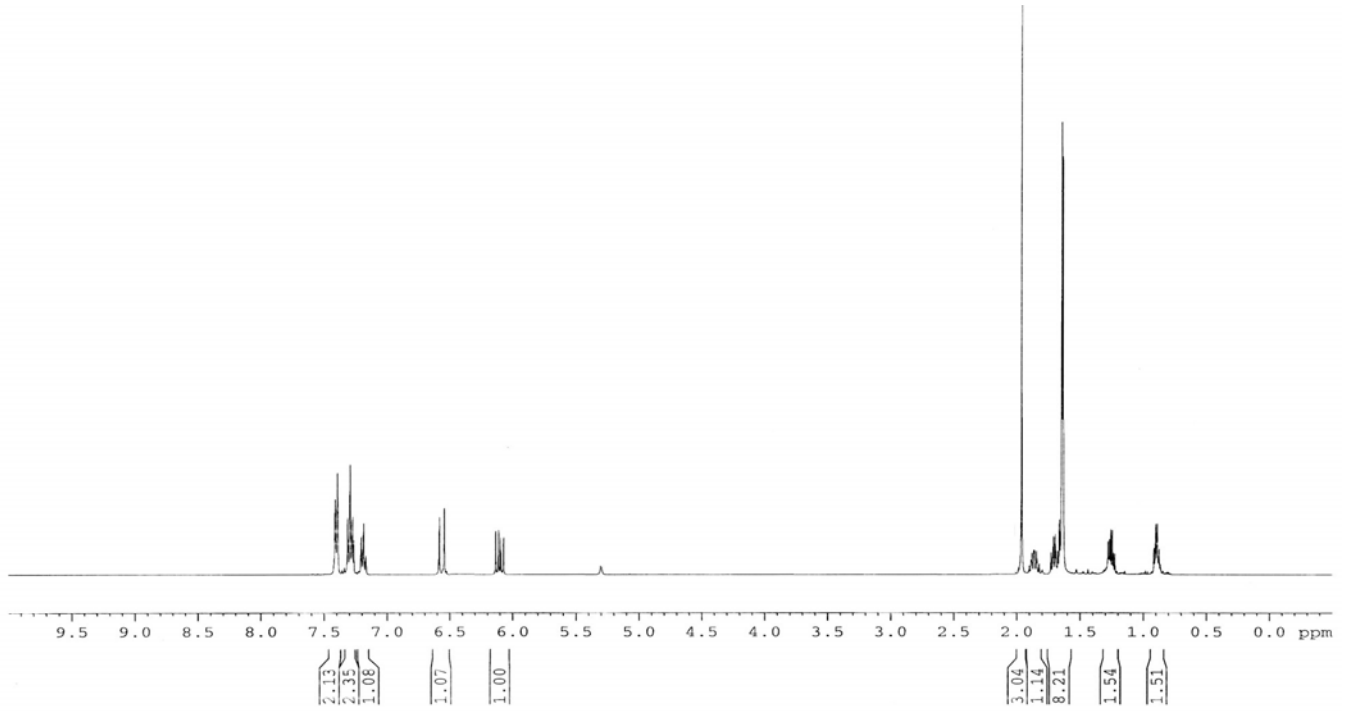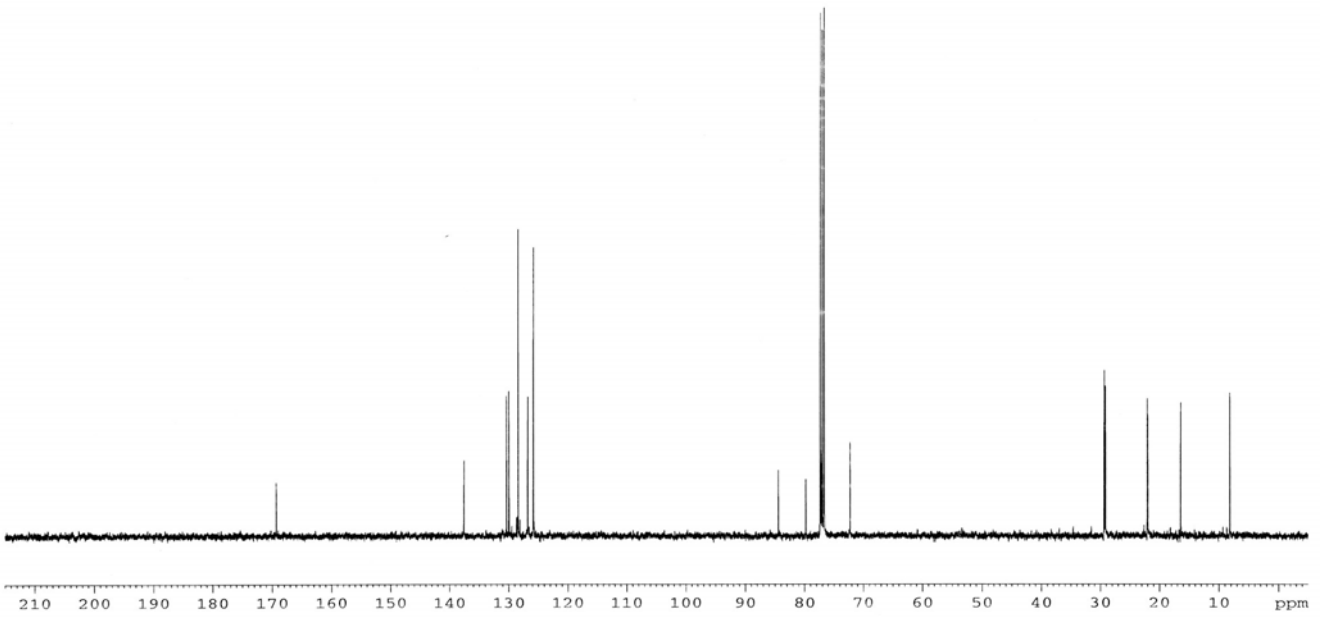

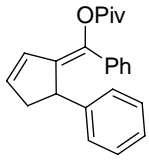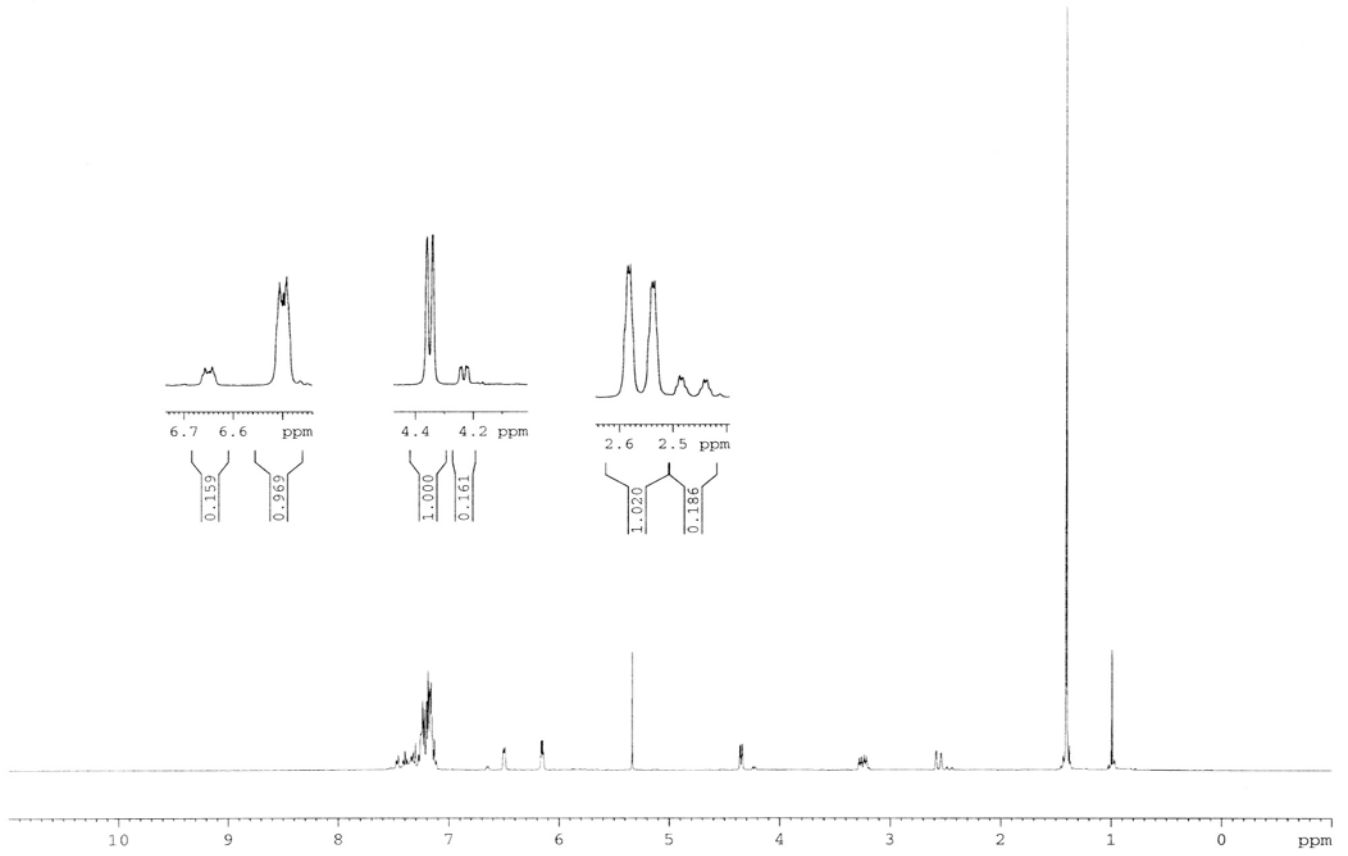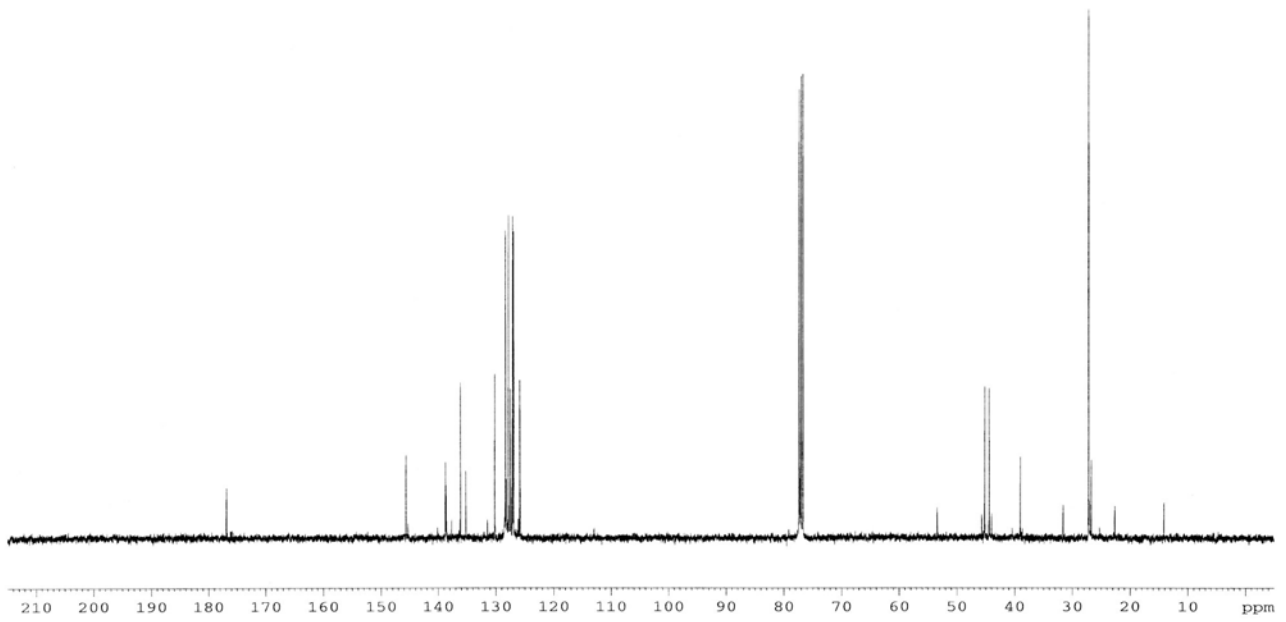

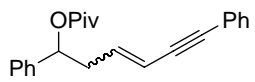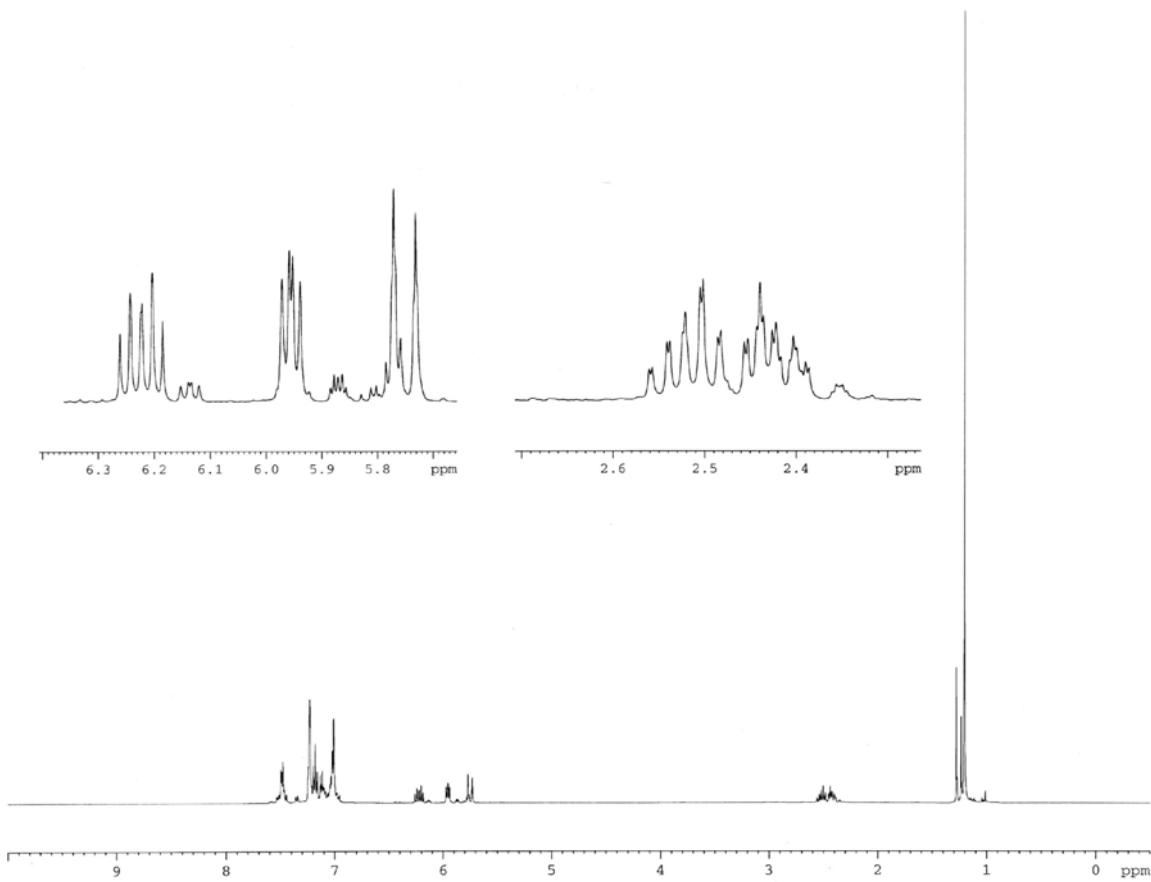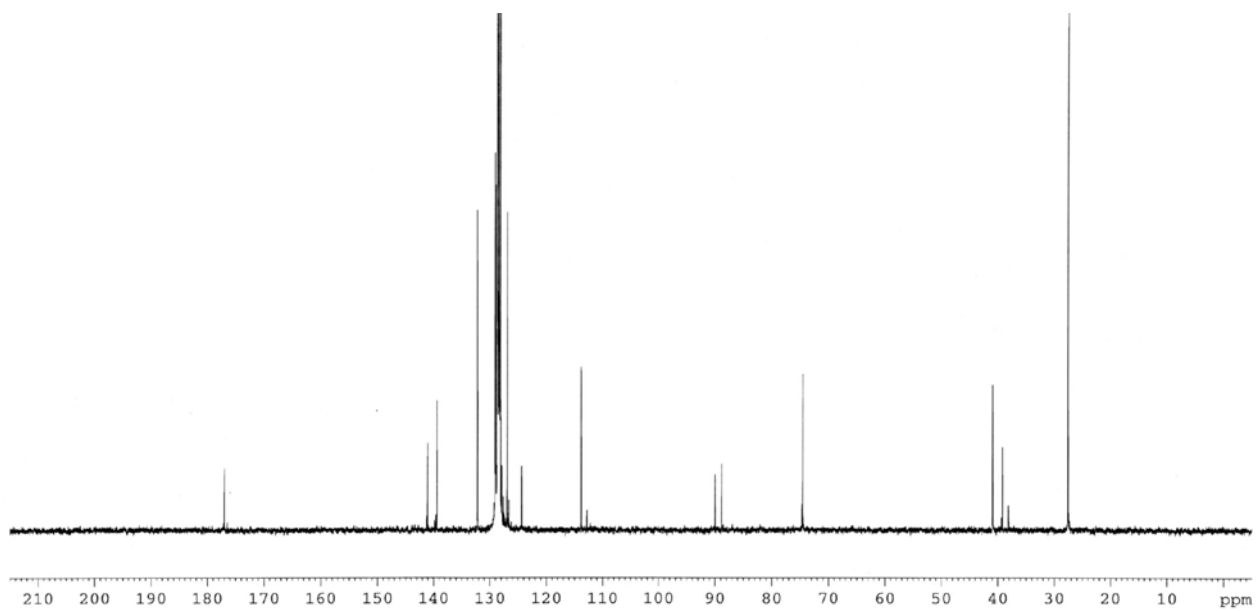

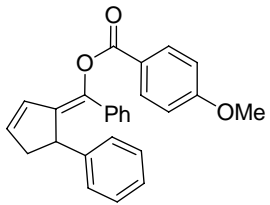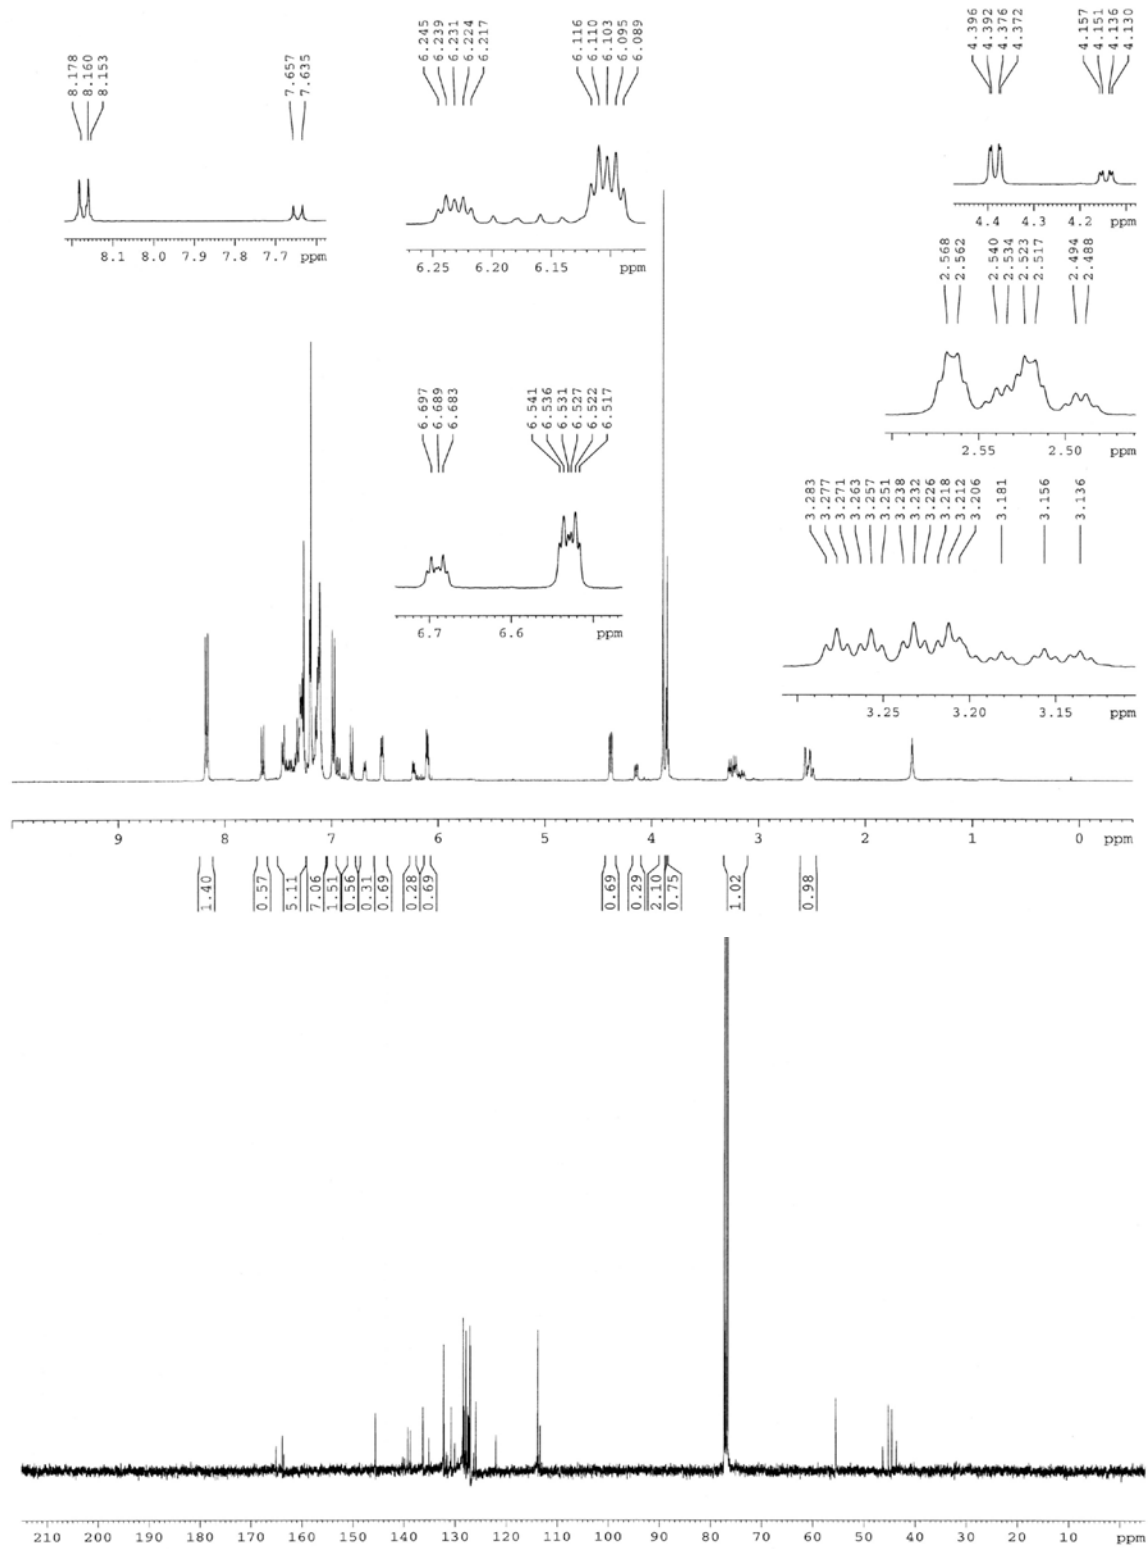

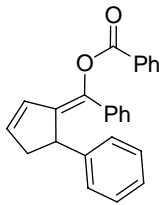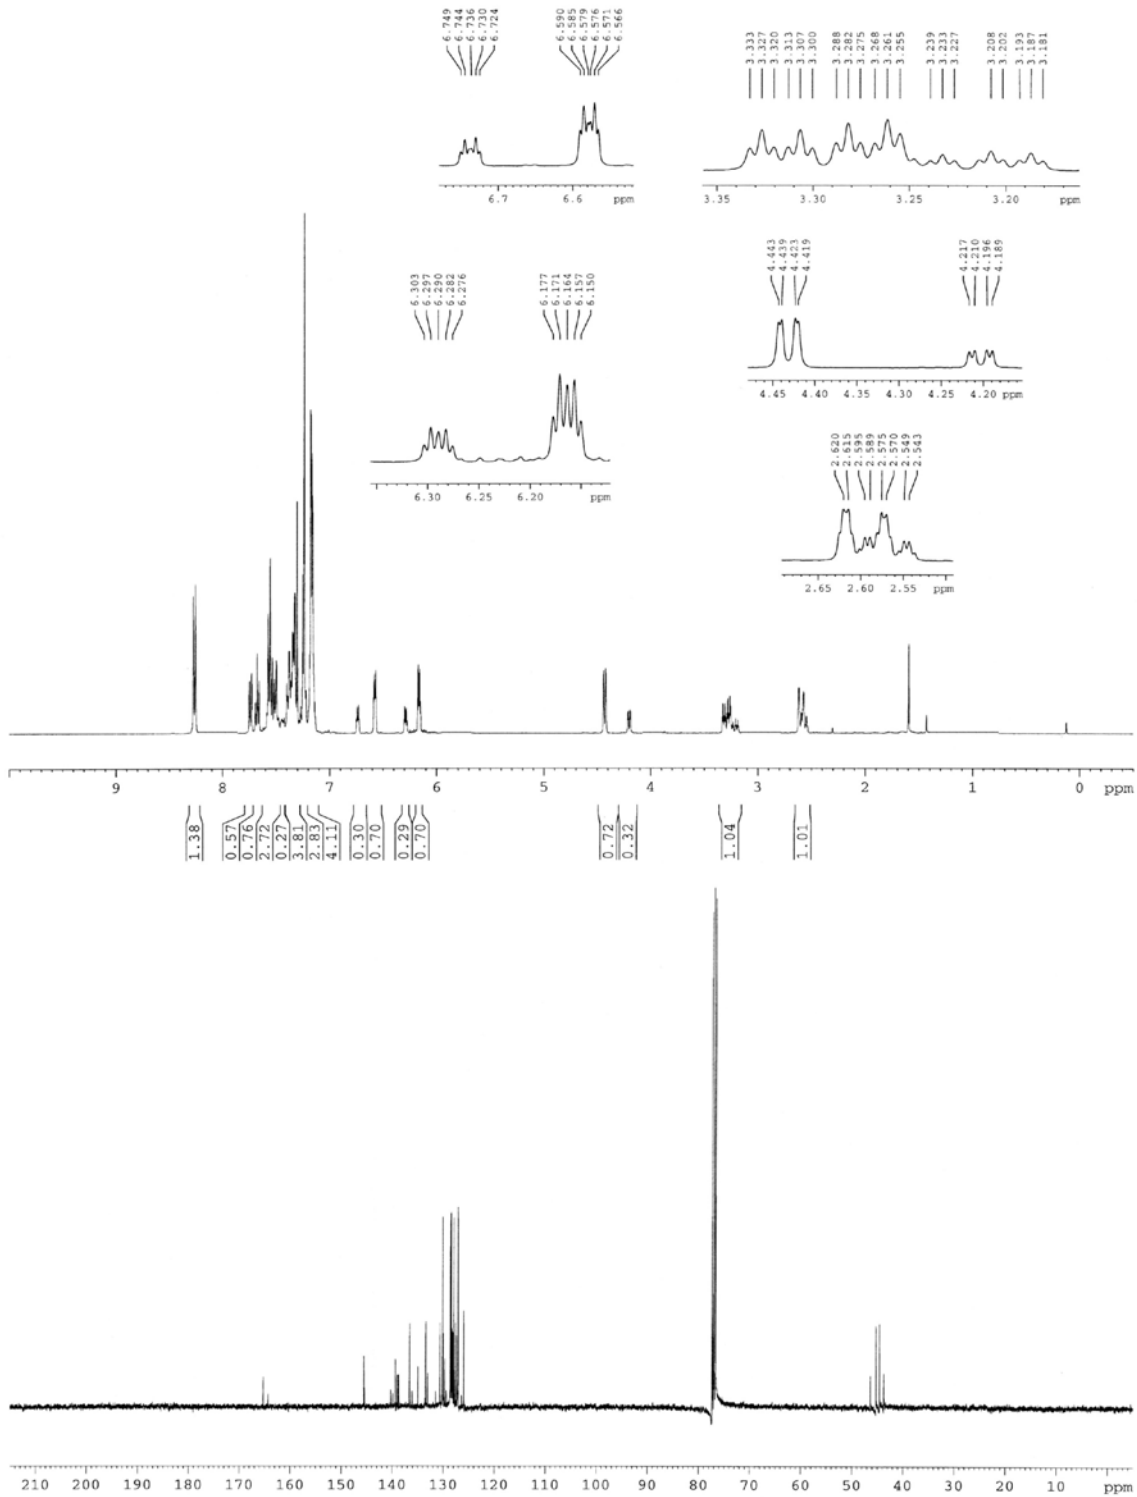

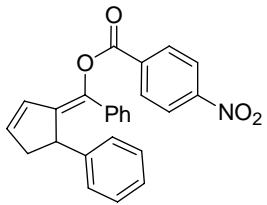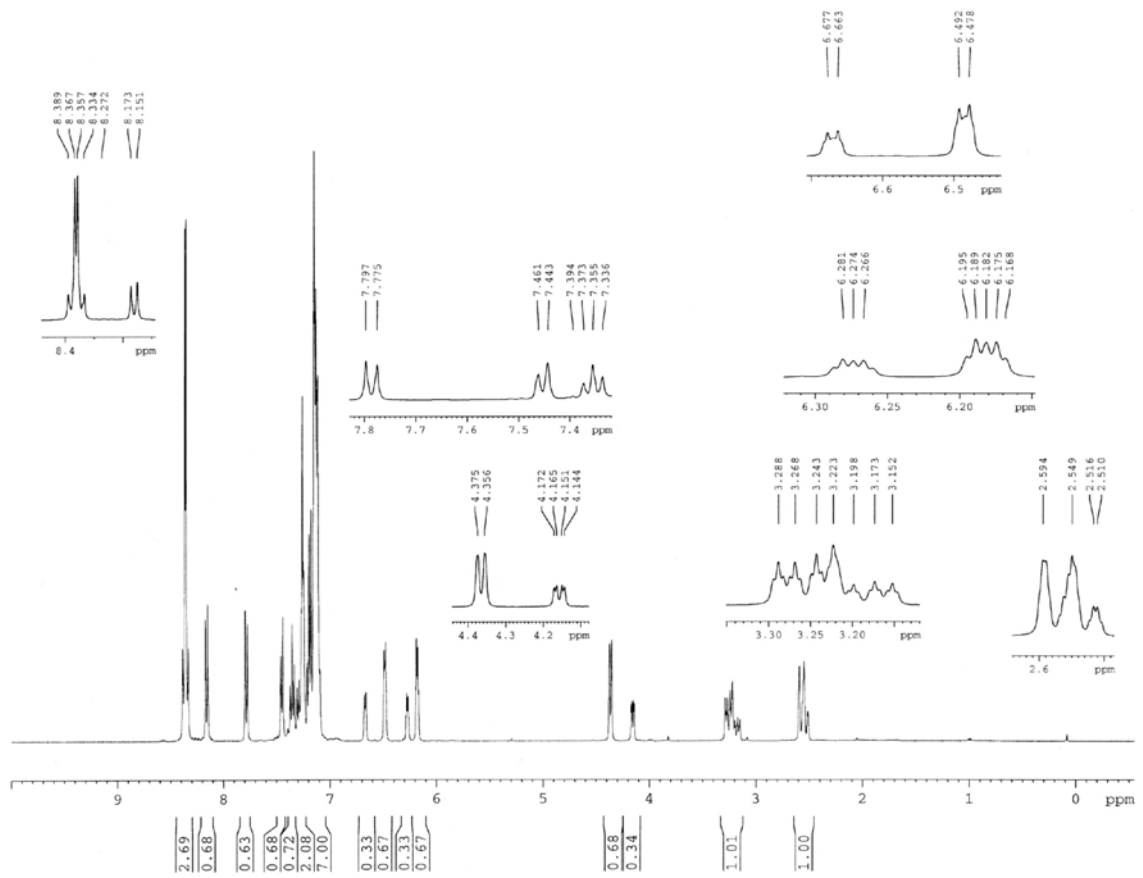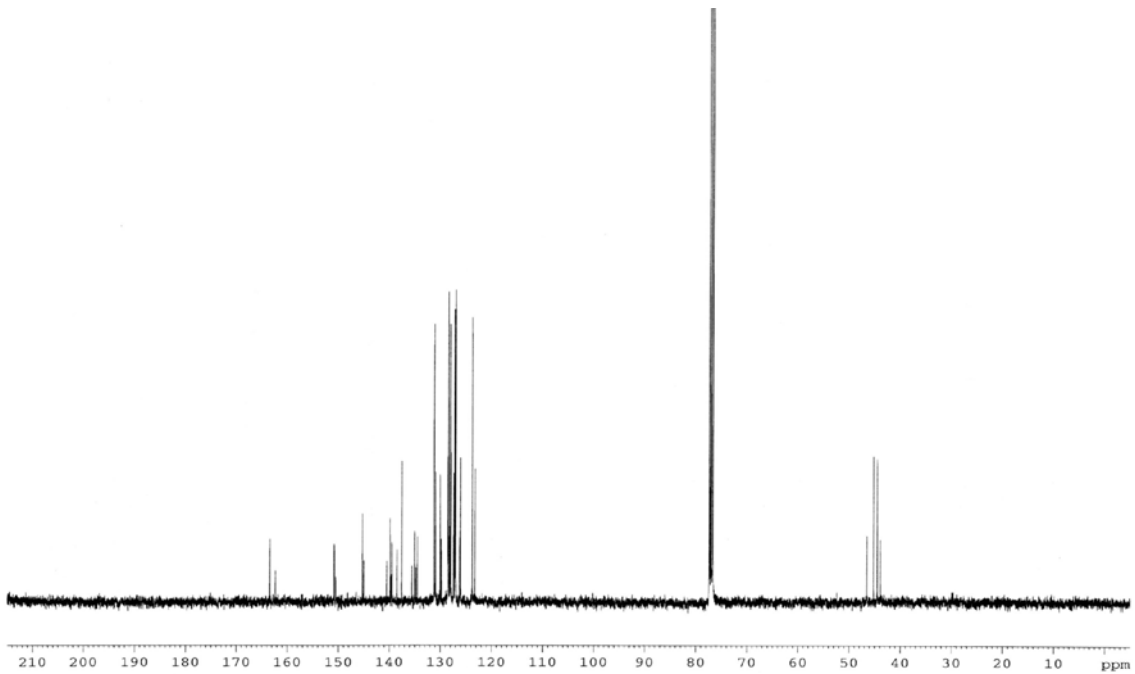

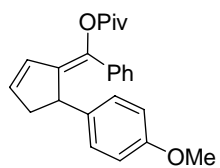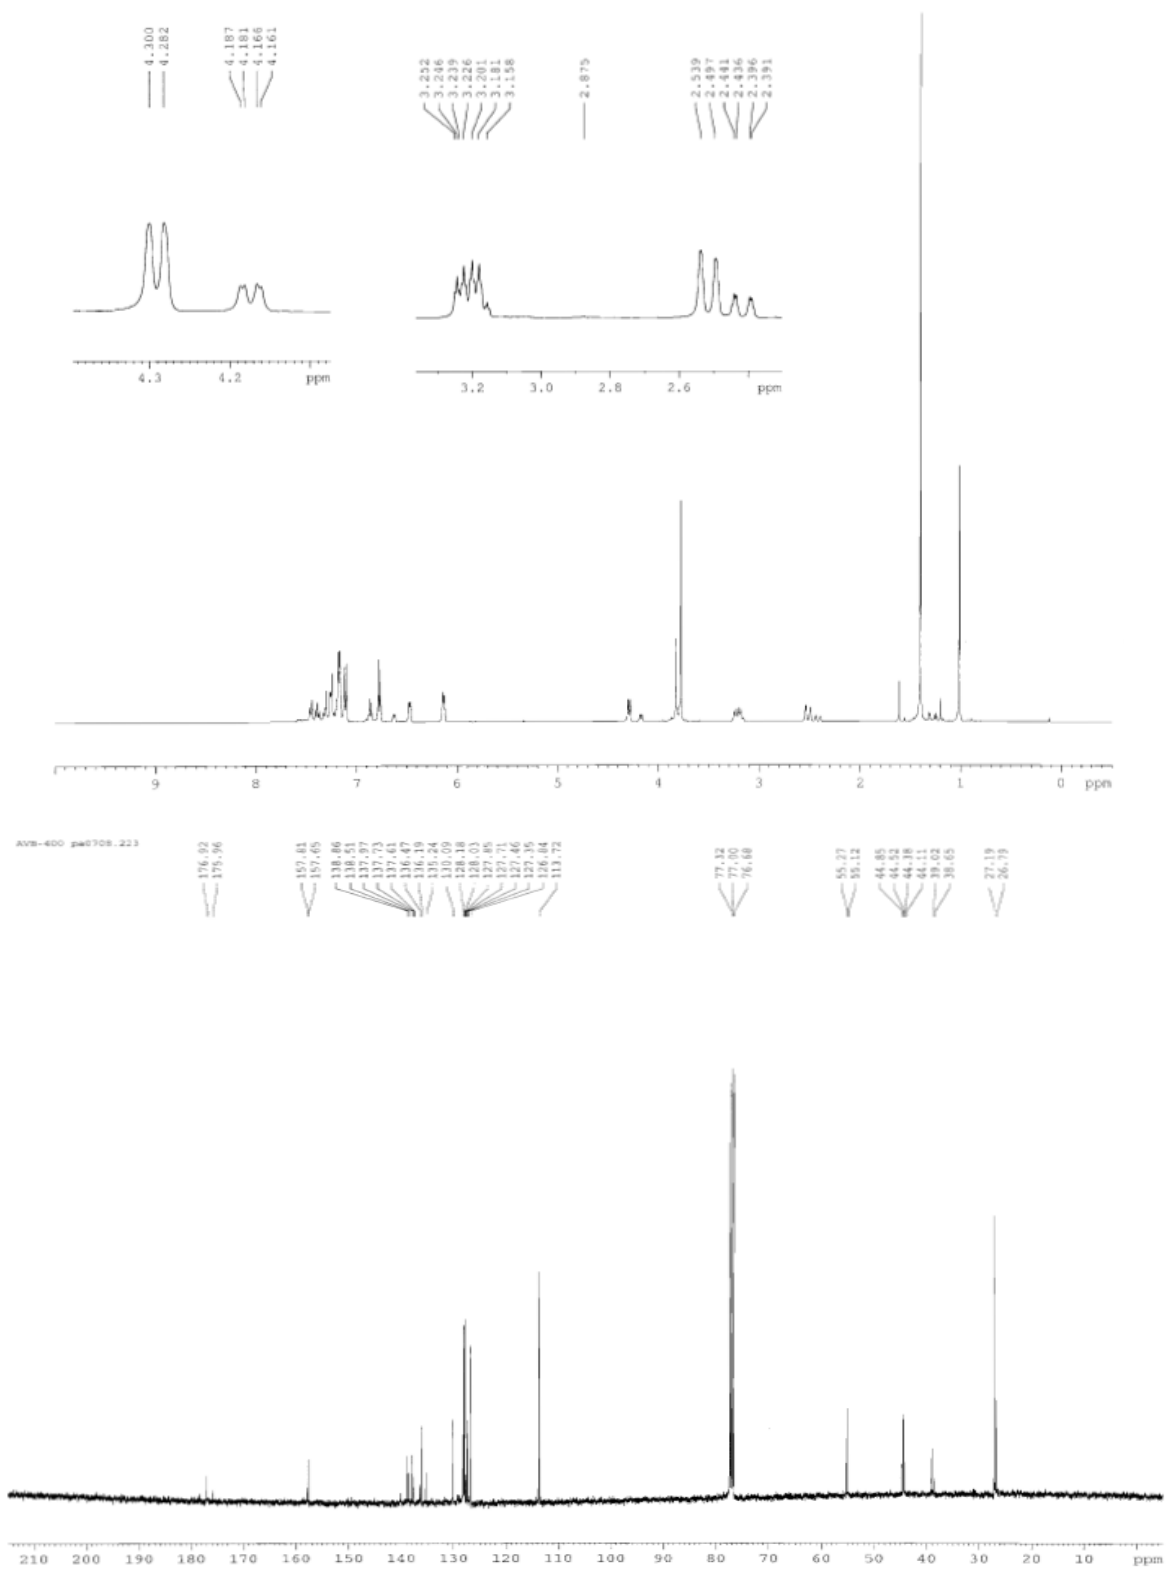

Supplement: NIHMS101866-supplement-2_si_002.pdf [file NIHMS101866-supplement-2_si_002.pdf]
